# Supplementary material for: Comparative genomics and transcriptomics of 4 Paragonimus species provide insights into lung fluke parasitism and pathogenesis
Source: PubMed Central journal article supplement (PMC7370270; doi:10.1093/gigascience/giaa073), 2020-07-20

## Comparative genomics and transcriptomics of four *Paragonimus* species provide insights into lung fluke parasitism and pathogenesis

--Manuscript Draft--

|                             |                                                                                                                                                                                                                                                                                                                                                                                                                                                                                                                                                                                                                                                                                                                                                                                                                                                                                                                                                                                                                                                                                                                                                                                                                                                                                                                                                                                                                                                                                                                                                                                                                                                                                                                                                                                                                                               |                       |
|-----------------------------|-----------------------------------------------------------------------------------------------------------------------------------------------------------------------------------------------------------------------------------------------------------------------------------------------------------------------------------------------------------------------------------------------------------------------------------------------------------------------------------------------------------------------------------------------------------------------------------------------------------------------------------------------------------------------------------------------------------------------------------------------------------------------------------------------------------------------------------------------------------------------------------------------------------------------------------------------------------------------------------------------------------------------------------------------------------------------------------------------------------------------------------------------------------------------------------------------------------------------------------------------------------------------------------------------------------------------------------------------------------------------------------------------------------------------------------------------------------------------------------------------------------------------------------------------------------------------------------------------------------------------------------------------------------------------------------------------------------------------------------------------------------------------------------------------------------------------------------------------|-----------------------|
| <b>Manuscript Number:</b>   | GIGA-D-19-00411R3                                                                                                                                                                                                                                                                                                                                                                                                                                                                                                                                                                                                                                                                                                                                                                                                                                                                                                                                                                                                                                                                                                                                                                                                                                                                                                                                                                                                                                                                                                                                                                                                                                                                                                                                                                                                                             |                       |
| <b>Full Title:</b>          | Comparative genomics and transcriptomics of four <i>Paragonimus</i> species provide insights into lung fluke parasitism and pathogenesis                                                                                                                                                                                                                                                                                                                                                                                                                                                                                                                                                                                                                                                                                                                                                                                                                                                                                                                                                                                                                                                                                                                                                                                                                                                                                                                                                                                                                                                                                                                                                                                                                                                                                                      |                       |
| <b>Article Type:</b>        | Research                                                                                                                                                                                                                                                                                                                                                                                                                                                                                                                                                                                                                                                                                                                                                                                                                                                                                                                                                                                                                                                                                                                                                                                                                                                                                                                                                                                                                                                                                                                                                                                                                                                                                                                                                                                                                                      |                       |
| <b>Funding Information:</b> | National Institutes of Health - National Human Genome Research Institute (U54HG003079)                                                                                                                                                                                                                                                                                                                                                                                                                                                                                                                                                                                                                                                                                                                                                                                                                                                                                                                                                                                                                                                                                                                                                                                                                                                                                                                                                                                                                                                                                                                                                                                                                                                                                                                                                        | Dr. Makedonka Mitreva |
|                             | National Institutes of Health - National Institute of Allergy and Infectious Diseases (AI081803)                                                                                                                                                                                                                                                                                                                                                                                                                                                                                                                                                                                                                                                                                                                                                                                                                                                                                                                                                                                                                                                                                                                                                                                                                                                                                                                                                                                                                                                                                                                                                                                                                                                                                                                                              | Dr. Makedonka Mitreva |
|                             | National Institutes of Health - National Institute of General Medical Sciences (GM097435)                                                                                                                                                                                                                                                                                                                                                                                                                                                                                                                                                                                                                                                                                                                                                                                                                                                                                                                                                                                                                                                                                                                                                                                                                                                                                                                                                                                                                                                                                                                                                                                                                                                                                                                                                     | Dr. Makedonka Mitreva |
|                             | Thailand Research Fund (TH) - Distinguished Research Professor Grant (DPG6280002)                                                                                                                                                                                                                                                                                                                                                                                                                                                                                                                                                                                                                                                                                                                                                                                                                                                                                                                                                                                                                                                                                                                                                                                                                                                                                                                                                                                                                                                                                                                                                                                                                                                                                                                                                             | Dr. Wanchai Maleewong |
| <b>Abstract:</b>            | <p><b>Background</b></p> <p><i>Paragonimus</i> spp. (lung flukes) are among the most injurious food-borne helminths, infecting ~23 million people, (~293 million with infection risk). Paragonimiasis is acquired from infected undercooked crustaceans and primarily affects the lungs, but often causes lesions elsewhere including the brain. The disease is easily mistaken for tuberculosis due to similar pulmonary symptoms, and accordingly, diagnostics are in demand.</p> <p><b>Results</b></p> <p>We assembled, annotated and compared draft genomes of four prevalent and distinct <i>Paragonimus</i> species: <i>P. miyazakii</i>, <i>P. westermani</i>, <i>P. kellicotti</i> and <i>P. heterotremus</i>. Genomes ranged from 697 to 923 Mb, included 12,072 to 12,853 genes, and were 71.6% to 90.1% complete according to BUSCO. Orthologous group (OG) analysis spanning 21 species (lung, liver and blood flukes, additional platyhelminths and hosts) provided insights into lung fluke biology, including identifying 256 lung fluke-specific and conserved OGs enriched for iron acquisition, immune modulation and other parasite functions. Transcriptome analysis identified consistent adult-stage <i>Paragonimus</i> expression profiles, and previously identified <i>Paragonimus</i> diagnostic antigens were matched to genes, providing an opportunity to optimize and ensure pan-<i>Paragonimus</i>-reactivity for diagnostic assays.</p> <p><b>Conclusions</b></p> <p>This report provides advances in molecular understanding of <i>Paragonimus</i> and underpins future studies into the biology, evolution and pathogenesis of <i>Paragonimus</i> and related food-borne flukes. We anticipate that these novel genomic and transcriptomic resources will be invaluable for future lung fluke research.</p> |                       |

|                                                      |                                                                                                                                                                                                                                                                                                                                                                                                                                                                                                                                                                                                                                                                                                                                                                                                                                                                                                                                                                                                                                                                                                                                                                                                                                    |
|------------------------------------------------------|------------------------------------------------------------------------------------------------------------------------------------------------------------------------------------------------------------------------------------------------------------------------------------------------------------------------------------------------------------------------------------------------------------------------------------------------------------------------------------------------------------------------------------------------------------------------------------------------------------------------------------------------------------------------------------------------------------------------------------------------------------------------------------------------------------------------------------------------------------------------------------------------------------------------------------------------------------------------------------------------------------------------------------------------------------------------------------------------------------------------------------------------------------------------------------------------------------------------------------|
| <b>Corresponding Author:</b>                         | Makedonka Mitreva<br>UNITED STATES                                                                                                                                                                                                                                                                                                                                                                                                                                                                                                                                                                                                                                                                                                                                                                                                                                                                                                                                                                                                                                                                                                                                                                                                 |
| <b>Corresponding Author Secondary Information:</b>   |                                                                                                                                                                                                                                                                                                                                                                                                                                                                                                                                                                                                                                                                                                                                                                                                                                                                                                                                                                                                                                                                                                                                                                                                                                    |
| <b>Corresponding Author's Institution:</b>           |                                                                                                                                                                                                                                                                                                                                                                                                                                                                                                                                                                                                                                                                                                                                                                                                                                                                                                                                                                                                                                                                                                                                                                                                                                    |
| <b>Corresponding Author's Secondary Institution:</b> |                                                                                                                                                                                                                                                                                                                                                                                                                                                                                                                                                                                                                                                                                                                                                                                                                                                                                                                                                                                                                                                                                                                                                                                                                                    |
| <b>First Author:</b>                                 | Bruce A Rosa                                                                                                                                                                                                                                                                                                                                                                                                                                                                                                                                                                                                                                                                                                                                                                                                                                                                                                                                                                                                                                                                                                                                                                                                                       |
| <b>First Author Secondary Information:</b>           |                                                                                                                                                                                                                                                                                                                                                                                                                                                                                                                                                                                                                                                                                                                                                                                                                                                                                                                                                                                                                                                                                                                                                                                                                                    |
| <b>Order of Authors:</b>                             | Bruce A Rosa<br>Young-Jun Choi<br>Samantha N McNulty<br>Hyeim Jung<br>John Martin<br>Takeshi Agatsuma<br>Hiromu Sugiyama<br>Thanh Hoa Le<br>Pham Ngoc Doanh<br>Wanchai Maleewong<br>David Blair<br>Paul J. Brindley<br>Peter U. Fischer<br>Makedonka Mitreva                                                                                                                                                                                                                                                                                                                                                                                                                                                                                                                                                                                                                                                                                                                                                                                                                                                                                                                                                                       |
| <b>Order of Authors Secondary Information:</b>       |                                                                                                                                                                                                                                                                                                                                                                                                                                                                                                                                                                                                                                                                                                                                                                                                                                                                                                                                                                                                                                                                                                                                                                                                                                    |
| <b>Response to Reviewers:</b>                        | GIGA-D-19-00411R2<br><br>Response to editor comments<br><br>>Your manuscript "Comparative genomics and transcriptomics of four Paragonimus species provide insights into lung fluke parasitism and pathogenesis" (GIGA-D-19-00411R2) has been assessed by our Editorial Board member. Based on their feedback and my own assessment as Editor, I am pleased to inform you that it is potentially acceptable for publication in GigaScience, as a Research paper, once you have carried out some essential revisions suggested by myself.<br><br>>There are some sections missing that need to be added to the manuscript as well as a lot of key information in the supplementary files that should be moved to the main paper. - in particular under the "Availability of Supporting Data". Please see my comments in the attached PDF.<br><br>Author Response<br><br>Thank you for your provisional acceptance of the manuscript! As requested, we have made the following requested corrections to the manuscript, as indicated in the PDF:<br><br>- The keywords list has been moved down to the appropriate location following the Abstract.<br><br>- A "Data Description" section has been added, according to instructions. |

|                                                                                                                                                                                                                                                                                                                                                                                                                                    |                                                                                                                                                                                                                                                                                                                                                                                                                                                                                                                                                                                                                                                                                                                                                                                                                                                                                                                                                                                                                                                                                                                                                                                                                                                                                                                                                                                                                                                                     |
|------------------------------------------------------------------------------------------------------------------------------------------------------------------------------------------------------------------------------------------------------------------------------------------------------------------------------------------------------------------------------------------------------------------------------------|---------------------------------------------------------------------------------------------------------------------------------------------------------------------------------------------------------------------------------------------------------------------------------------------------------------------------------------------------------------------------------------------------------------------------------------------------------------------------------------------------------------------------------------------------------------------------------------------------------------------------------------------------------------------------------------------------------------------------------------------------------------------------------------------------------------------------------------------------------------------------------------------------------------------------------------------------------------------------------------------------------------------------------------------------------------------------------------------------------------------------------------------------------------------------------------------------------------------------------------------------------------------------------------------------------------------------------------------------------------------------------------------------------------------------------------------------------------------|
|                                                                                                                                                                                                                                                                                                                                                                                                                                    | <p>- All supplementary figures have been moved into the manuscript as main figures, and the numbering has been fixed accordingly, both within the manuscript and on the system.</p> <p>- Supplementary Table 1 was moved into the manuscript as a main table, and the table numbering has been fixed accordingly.</p> <p>- However, due to the very large sizes of the remaining supplementary tables, it is impossible to provide these as tables within the text. These include:</p> <ul style="list-style-type: none"> <li>•Supplementary Table S2 (now numbered S1) is a 6.2MB database, with 4 spreadsheets of &gt;12,000 rows each, and up to 50 columns of data.</li> <li>•Supplementary Table S3 (now numbered S2) is a 5.1 MB database, with 4 spreadsheets of ~5000 rows x ~75 columns.</li> <li>•Supplementary Table S4 (now numbered as S3) is a 5.3MB database of ~20,000 rows x 36 columns.</li> </ul> <p>We hope that it is acceptable to simply upload these as supplementary tables in order to make the data easily accessible to readers.</p> <p>While not in your requested comment, we would also like to ask for your guidance in something that we are not able to do on the system. This MS has a co-shared first authorship and while this is correct in the MS file we could not find a way to make this distinction in the list of authors on the system. Can you please make sure this is filled out the correct way on the system.</p> |
| <b>Additional Information:</b>                                                                                                                                                                                                                                                                                                                                                                                                     |                                                                                                                                                                                                                                                                                                                                                                                                                                                                                                                                                                                                                                                                                                                                                                                                                                                                                                                                                                                                                                                                                                                                                                                                                                                                                                                                                                                                                                                                     |
| <b>Question</b>                                                                                                                                                                                                                                                                                                                                                                                                                    | <b>Response</b>                                                                                                                                                                                                                                                                                                                                                                                                                                                                                                                                                                                                                                                                                                                                                                                                                                                                                                                                                                                                                                                                                                                                                                                                                                                                                                                                                                                                                                                     |
| Are you submitting this manuscript to a special series or article collection?                                                                                                                                                                                                                                                                                                                                                      | No                                                                                                                                                                                                                                                                                                                                                                                                                                                                                                                                                                                                                                                                                                                                                                                                                                                                                                                                                                                                                                                                                                                                                                                                                                                                                                                                                                                                                                                                  |
| <p><b>Experimental design and statistics</b></p> <p>Full details of the experimental design and statistical methods used should be given in the Methods section, as detailed in our <a href="#">Minimum Standards Reporting Checklist</a>. Information essential to interpreting the data presented should be made available in the figure legends.</p> <p>Have you included all the information requested in your manuscript?</p> | Yes                                                                                                                                                                                                                                                                                                                                                                                                                                                                                                                                                                                                                                                                                                                                                                                                                                                                                                                                                                                                                                                                                                                                                                                                                                                                                                                                                                                                                                                                 |
| <p><b>Resources</b></p> <p>A description of all resources used, including antibodies, cell lines, animals and software tools, with enough information to allow them to be uniquely identified, should be included in the Methods section. Authors are strongly encouraged to cite <a href="#">Research Resource Identifiers</a> (RRIDs) for antibodies, model</p>                                                                  | Yes                                                                                                                                                                                                                                                                                                                                                                                                                                                                                                                                                                                                                                                                                                                                                                                                                                                                                                                                                                                                                                                                                                                                                                                                                                                                                                                                                                                                                                                                 |

|                                                                                                                                                                                                                                                                                                                                                                                                                                                                                                                                                         |     |
|---------------------------------------------------------------------------------------------------------------------------------------------------------------------------------------------------------------------------------------------------------------------------------------------------------------------------------------------------------------------------------------------------------------------------------------------------------------------------------------------------------------------------------------------------------|-----|
| <p>organisms and tools, where possible.</p> <p>Have you included the information requested as detailed in our <a href="#">Minimum Standards Reporting Checklist</a>?</p>                                                                                                                                                                                                                                                                                                                                                                                |     |
| <p><b>Availability of data and materials</b></p> <p>All datasets and code on which the conclusions of the paper rely must be either included in your submission or deposited in <a href="#">publicly available repositories</a> (where available and ethically appropriate), referencing such data using a unique identifier in the references and in the “Availability of Data and Materials” section of your manuscript.</p> <p>Have you have met the above requirement as detailed in our <a href="#">Minimum Standards Reporting Checklist</a>?</p> | Yes |

1 **Comparative genomics and transcriptomics of four *Paragonimus* species provide insights into lung**  
2 **fluke parasitism and pathogenesis**

3 Bruce A. Rosa<sup>1\*</sup>, Young-Jun Choi<sup>1\*</sup>, Samantha N. McNulty<sup>2</sup>, Hyeim Jung<sup>1</sup>, John Martin<sup>1</sup>, Takeshi Agatsuma<sup>3</sup>,  
4 Hiromu Sugiyama<sup>4</sup>, Thanh Hoa Le<sup>5</sup>, Pham Ngoc Doanh<sup>6,7</sup>, Wanchai Maleewong<sup>8</sup>, David Blair<sup>9</sup>, Paul J. Brindley<sup>10</sup>,  
5 Peter U. Fischer<sup>1</sup>, Makedonka Mitreva<sup>1,2†</sup>

6 <sup>1</sup>Department of Internal Medicine, Washington University School of Medicine, St. Louis, MO 63110, USA

7 <sup>2</sup>The McDonnell Genome Institute at Washington University, School of Medicine, St. Louis, MO 63108, USA

8 <sup>3</sup>Department of Environmental Health Sciences, Kochi Medical School, Oko, Nankoku City, Kochi 783-8505,  
9 Japan

10 <sup>4</sup>Laboratory of Helminthology, Department of Parasitology, National Institute of Infectious Diseases, Tokyo 162-  
11 8640, Japan

12 <sup>5</sup>Department of Immunology, Institute of Biotechnology, Vietnam Academy of Science and Technology, Hanoi,  
13 Vietnam

14 <sup>6</sup>Institute of Ecology and Biological Resources, Vietnam Academy of Science and Technology, Hanoi, Vietnam

15 <sup>7</sup>Graduate University of Science and Technology, Vietnam Academy of Science and Technology, Hanoi, Vietnam

16 <sup>8</sup>Research and Diagnostic Center for Emerging Infectious Diseases, Khon Kaen University, Khon Kaen,  
17 Thailand, Department of Parasitology, Faculty of Medicine, Khon Kaen University, Khon Kaen, Thailand

18 <sup>9</sup>College of Marine and Environmental Sciences, James Cook University, Townsville, Queensland 4811,  
19 Australia

20 <sup>10</sup>Departments of Microbiology, Immunology and Tropical Medicine, and Research Center for Neglected  
21 Diseases of Poverty, and Pathology School of Medicine & Health Sciences, George Washington University,  
22 Washington, DC 20037, USA

23 \*Authors contributed equally to this work

24 †Correspondence should be addressed to Makedonka Mitreva. Tel. +1-314-285-2005,

25 Fax +1-314-286-1800, Email: [mmitreva@wustl.edu](mailto:mmitreva@wustl.edu)

26

27

28 **Emails:**

29 Bruce A. Rosa: [barosa@wustl.edu](mailto:barosa@wustl.edu)

30 Young-Jun Choi: [choi.y@wustl.edu](mailto:choi.y@wustl.edu)

31 Samantha N. McNulty: [samantha.n.mcnulty@gmail.com](mailto:samantha.n.mcnulty@gmail.com)

32 Hyeim Jung: [jungh@wustl.edu](mailto:jungh@wustl.edu)

33 John Martin: [jmartin@wustl.edu](mailto:jmartin@wustl.edu)

34 Takeshi Agatsuma: [agatsuma@kochi-u.ac.jp](mailto:agatsuma@kochi-u.ac.jp)

35 Hiromu Sugiyama: [hsugi@niid.go.jp](mailto:hsugi@niid.go.jp)

36 Thanh Hoa Le: [imibtvn@gmail.com](mailto:imibtvn@gmail.com)

37 Pham Ngoc Doanh: [pndoanh@yahoo.com](mailto:pndoanh@yahoo.com)

38 Wanchai Maleewong: [wanch\\_ma@kku.ac.th](mailto:wanch_ma@kku.ac.th)

39 David Blair: [david.blair@jcu.edu.au](mailto:david.blair@jcu.edu.au)

40 Paul J. Brindley: [pbrindley@gwu.edu](mailto:pbrindley@gwu.edu)

41 Peter U. Fischer: [pufischer@wustl.edu](mailto:pufischer@wustl.edu)

42 Makedonka Mitreva: [mmitreva@wustl.edu](mailto:mmitreva@wustl.edu)

43

44 **Abstract**

45 Background

46 *Paragonimus* spp. (lung flukes) are among the most injurious food-borne helminths, infecting ~23 million people  
47 and ~292 million with infection risk. Paragonimiasis is acquired from infected undercooked crustaceans and  
48 primarily affects the lungs, but often causes lesions elsewhere including the brain. The disease is easily mistaken  
49 for tuberculosis due to similar pulmonary symptoms, and accordingly, diagnostics are in demand.

50 Results

51 We assembled, annotated and compared draft genomes of four prevalent and distinct *Paragonimus* species: *P.*  
52 *miyazakii*, *P. westermani*, *P. kellicotti* and *P. heterotremus*. Genomes ranged from 697 to 923 Mb, included  
53 12,072 to 12,853 genes, and were 71.6% to 90.1% complete according to BUSCO. Orthologous group (OG)  
54 analysis spanning 21 species (lung, liver and blood flukes, additional platyhelminths and hosts) provided insights  
55 into lung fluke biology. We identified 256 lung fluke-specific and conserved OGs with consistent transcriptional  
56 adult-stage *Paragonimus* expression profiles and enriched for iron acquisition, immune modulation and other  
57 parasite functions. Previously identified *Paragonimus* diagnostic antigens were matched to genes, providing an  
58 opportunity to optimize and ensure pan-*Paragonimus*-reactivity for diagnostic assays.

59 Conclusions

60 This report provides advances in molecular understanding of *Paragonimus* and underpins future studies into the  
61 biology, evolution and pathogenesis of *Paragonimus* and related food-borne flukes. We anticipate that these  
62 novel genomic and transcriptomic resources will be invaluable for future lung fluke research.

63

64 **Keywords**

65 Lung flukes, *Paragonimus*, genomics, transcriptomics, diagnostics, paragonimiasis, infectious disease, trematodes

66

## 67 **Background**

68 The trematode genus *Paragonimus*, the lung flukes, is among the most injurious taxon of food-borne  
69 helminths. About 23 million people are infected with lung flukes [1], an estimated 292 million people are at-risk,  
70 mainly in eastern Asia [2] , and billions of people live in areas where *Paragonimus* infections of animals are endemic.  
71 The life-cycle of *Paragonimus* species involves freshwater snails, crustacean intermediate hosts and mammals in  
72 Asia, parts of Africa, and the Americas [3]. Human paragonimiasis is acquired by consuming raw or undercooked  
73 shrimp and crabs containing the metacercaria, which is the infective stage. Although primarily affecting the lungs,  
74 lesions can occur at other sites, including the brain, and pulmonary paragonimiasis is frequently mistaken for  
75 tuberculosis due to similar respiratory symptoms [4].

76 Pathogenesis ensues because of the migration of the newly invading juveniles from the gut to the lungs  
77 and through not-infrequent ectopic migration to the brain, reproductive organs, and subcutaneous sites at the  
78 extremities, and because of toxins and other mediators released by the parasites during the larval migration [4,  
79 5]. The presence of the flukes in the lung causes hemorrhage, inflammation with leukocytic infiltration and  
80 necrosis of lung parenchyma that gradually proceeds to the development of fibrotic encapsulation except for a  
81 fistula from the evolving lesion to the respiratory tract. Eggs of the lung fluke exit the encapsulated lesion through  
82 the fistula to reach the sputum and/or feces of the host, where they pass to the external environment,  
83 accomplishing transmission of the parasite [6]. There are signs and symptoms that allow characterization of  
84 acute and chronic stages of paragonimiasis. In pulmonary paragonimiasis, for example, the most noticeable  
85 clinical symptom of an infected individual is a chronic cough with gelatinous, rusty brown, pneumonia-like, blood-  
86 streaked sputum [6]. Heavy work commonly induces hemoptysis. Pneumothorax, empyema from secondary  
87 bacterial infection and pleural effusion might also be presented. When symptoms include only a chronic cough,  
88 the disease may be misinterpreted as chronic bronchitis and bronchiectasis or bronchial asthma. Pulmonary  
89 paragonimiasis is frequently confused with pulmonary tuberculosis [4]. The symptoms of extra-pulmonary  
90 paragonimiasis vary depending on the location of the fluke, including cerebral [5] and abdominal paragonimiasis  
91 [6].

92 *Paragonimus* is a large genus that includes more than 50 nominal species [7]. Seven of these species or  
93 species complexes of *Paragonimus* are known to infect humans [3]. This is also an ancient genus, thought to have  
94 originated before the breakup of Gondwana [8], but possibly also dispersing as colonists from the original East



95 Asian clade, based on the distribution of host species [9]. To improve our understanding of pathogens across  
96 this genus at the molecular level, we have assembled, annotated and compared draft genomes of four of these,  
97 three from Asia (*P. westermani* from Japan, *P. heterotremus*, *P. miyazakii*) and one from North America (*P.*  
98 *kelllicotti*). Among them, *P. westermani* is the best-known species causing pulmonary paragonimiasis. This name  
99 has been applied to a genetically and geographically diverse complex of lung fluke populations differing widely in  
100 biological features including infectivity to humans [10]. The complex extends from India and Sri Lanka eastwards to  
101 Siberia, Korea and Japan, and southwards into Vietnam, Indonesia and the Philippines. However, human infections  
102 are reported primarily from China, Korea, Japan and the Philippines. Until this study, an Indian member of the *P.*  
103 *westermani* complex was the only lung fluke species for which a genome sequence was available [11].  
104 *Paragonimus heterotremus* is the most common cause of pulmonary paragonimiasis in southern China, Lao PDR,  
105 Vietnam, northeastern India and Thailand [6, 7]. *Paragonimus miyazakii* is a member of the *P. skrjabini* complex,  
106 to which Blair and co-workers accorded sub-specific status [12]. Flukes of this complex tend not to mature in  
107 humans but frequently cause ectopic disease at diverse sites, including the brain. In North America, infection with  
108 *P. kelllicotti* is primarily a disease of native, crayfish-eating mammals including the otter and mink. The occasional  
109 human infections can be severe, and thoracic involvement is typical [13, 14].

110 These four species represent a broad sampling of the phylogenetic diversity of the genus. Most of the  
111 known diversity, as revealed by DNA sequences from portions of the mitochondrial genome and the nuclear  
112 ribosomal genes, resides in Asia [15]. Analysis of the ITS2 marker by Blair et al [15] indicates that each of the  
113 species sequenced occupies a distinct clade within the phylogenetic tree.

114 In addition to a greater understanding of the genome contents of this group of food-borne trematodes,  
115 the findings presented here provide new information to assist development of diagnostic tools and recognition of  
116 potential drug targets. The data and findings facilitate evolutionary, zoogeographical and phylogenetic  
117 investigation of the genus *Paragonimus* and its host-parasite relationships through the comparative analysis of  
118 gene content relative to other sequenced platyhelminth and host species, and to known *Paragonimus* diagnostic  
119 antigen targets.

123  
124  
125  
126  
127  
128  
129  
130  
131  
132  
133  
134  
135  
136  
137  
138  
139  
140  
141  
142  
143  
144  
145  
146  
147  
148  
149  
150

## Data Description

Genomic sequence data were generated from DNA samples from four distinct *Paragonimus* species: three from Asia, *P. miyazakii* (Japan), *P. heterotremus* (LC strain, Vietnam), *Paragonimus westermani* (Japan) and one from North America, *P. kellicotti* (Missouri, USA). Illumina DNA sequencing produced short overlapping fragments and long insert size (3kb and 8kb) whole-genome shotgun libraries for all four species. Genome coverage per species is presented in **Table 1**. Due to the higher fragmentation rate of the *P. kellicotti* assembly, long read Pacific Biosciences reads were generated and used for assembly improvement (**Table 2**). To estimate the genetic divergence between geographically diverse samples, we compared our East Asian *P. westermani* sample from Japan with the previously published *P. westermani* genome from India by retrieving the Indian genome from the previous study [11]. To facilitate gene annotation in the newly generated assemblies and to provide transcriptomic data for analysis, adult-stage RNA-seq samples were also retrieved from our previous reports for *P. westermani* [16] and *P. kellicotti* [17]. We also collected adult-stage RNA samples for Illumina RNA-seq sequencing from young adult and adult samples for *P. heterotremus*, along with stages from the liver, peritoneal cavity, lung (adult) and pleural cavity for *P. miyazakii*.

Genomic raw reads, genome assemblies, genome annotations, and raw transcriptomic (RNA-Seq) fastq files were uploaded and are available for download from the NCBI Sequence Read Archive (SRA [18]), with all accession numbers and relevant metadata provided in **Table 1**. **Supplementary Table S1** provides, for each of the species, complete gene lists and gene expression levels for each of the RNA-Seq samples. All results of the genome-wide selection scan are provided in **Supplementary Table S2**. For each orthologous group identified, **Supplementary Table S3** provides complete gene lists, counts of genes per species, and average gene expression levels from each the *Paragonimus* transcriptome datasets described above. All relevant software versions, and commands specifying the parameters used are presented in **Supplementary Text S1**.

## Results and Discussion

### Genome features

The sizes of the four newly generated *Paragonimus* genomes range from 697 to 923 Mb, containing between 12,072 and 12,853 genes. These draft genomes are estimated to be between 71.6% and 90.1%

151 complete, according to the number of complete BUSCO eukaryote genes (single-copy or duplicate) [19], with  
152 the new *P. westermani* genome produced from a sample collected from Japan being more complete than the  
153 previously-sequenced genome produced from a sample collected from India [11] (90.1% vs 70.2%, respectively;  
154 **Table 2**). Here, statements about *P. westermani* apply to the new Japanese genome, unless otherwise stated.  
155 The total genome lengths of the *Paragonimus* spp. are larger than those of the Schistosomatidae and  
156 Opisthorchiidae, but smaller than those of Fasciolidae. However, the total numbers of protein-coding genes are  
157 comparable (**Table 2**; Complete gene lists for each species provided in **Supplementary Table S1**). Repetitive  
158 sequences occupy between 49% and 54% of the *Paragonimus* genomes (**Figure 1A**). The repeat landscapes,  
159 depicting the relative abundance of repeat classes in the genome, versus the Kimura divergence from the  
160 consensus, revealed that *P. kellicotti* in particular has a significant number of copies of transposable elements  
161 (TE) with high similarity to consensus (Kimura substitution level: 0-5), indicating recent and current TE activity  
162 (**Figure 1B**). In a recent study [20], TE activity in the Fasciolidae was found to be low. TEs are potent sources  
163 of mutation that can rapidly create genetic variance, especially following genetic bottlenecks and environmental  
164 changes, providing bursts of allelic and phenotypic diversity upon which selection can act [21, 22]. Therefore,  
165 changes in TE activity, modulated by environmentally induced physiological or genomic stress, may have a major  
166 effect on adaptation of populations and species facing novel habitats and large environmental perturbations [23].

167 Focusing on the gene content, *P. kellicotti* had the shortest average total gene length among the species,  
168 and the lung flukes overall had similar gene lengths to other flukes, while platyhelminth species other than  
169 trematodes have shorter genes overall (**Figure 2A**). The variability in gene lengths observed between species  
170 results from differences in both average intron lengths (**Figure 2B**) and the average number of exons per gene  
171 (**Figure 2C**) while the average coding sequence (CDS) lengths of the exons across all the platyhelminth species  
172 were similar to each other (**Figure 2D**). Whereas there was species-to-species variability in gene lengths and  
173 exon counts, consistent patterns among the types of flukes were not apparent. Some of this variability may have  
174 arisen due to the variation in quality of the assemblies, but these differences were minimized by only using  
175 complete gene models with a start and stop codon identified in the same frame.

176 Mitochondrial whole genome-based clustering was performed for the four *Paragonimus* species plus  
177 some additional existing previously-sequenced mitochondrial genome assemblies for *P. ohirai* and four for *P.*  
178 *westermani* (**Figure 3A**). This indicated that our Japanese *P. westermani* sample clustered with the existing

179 known *P. westermani* samples from eastern Asia, and that all the other three newly sequenced species were  
180 distinct from *P. ohirai*.

181 We generated a PacBio long-read based mitochondrial assembly for *P. kellicotti*. The fully circularized  
182 complete genome was 17.3 kb in length, including a 3.7 kb non-coding repeat region between *tRNA<sup>Gly</sup>* and *cox3*  
183 (**Figure 3B**). There are seven copies of long repeats (378 bp) and 9.5 copies of short repeats (111 bp). The long  
184 repeats overlap with six copies of *tRNA<sup>Glu</sup>*. This structural organization of repeat sequences does not resemble  
185 those found in previous comparison of *Paragonimus ohirai* and *P. westermani* [11] where the non-coding region  
186 is partitioned by *tRNA<sup>Glu</sup>* into two parts.

187 Clustering based on nuclear genomes single member orthologous protein families (OPFs) of the four  
188 new lung flukes, four liver flukes, three blood flukes, five other platyhelminthes, four host species and a yeast  
189 outgroup was performed based on the shared phylogeny among orthoOPF groups. These findings mirrored the  
190 mitochondrial clustering results for the lung fluke species (**Figure 4**), indicating that *P. westermani* is the earlier-  
191 diverging taxon, as previously suggested based on ribosomal RNA [24].

192 Our *P. westermani* reference genome was assembled using samples collected from Japan (Amakusa,  
193 Kyusyu). We compared the genomic sequences of our East Asian *P. westermani* to the recently published *P.*  
194 *westermani* genome from India (Changlang, Arunachal Pradesh) [11] to estimate the genetic divergence  
195 between geographically diverse samples. This analysis identified an average nucleotide sequence identity of  
196 87.6%.

### 197 Gene-family dynamics identify expanded functions distinguishing lung fluke species

199 We investigated large-scale differences in gene complements among families of digenetic trematodes  
200 (**Figure 5A**) and modeled gene gain and loss while accounting for the phylogenetic history of species [25]. Gene  
201 families of interest that displayed pronounced differential expansion or contraction (**Figure 5B**) included the  
202 papain-family cysteine proteases, cathepsins L, B and F, dynein heavy chain, spectrin/dystrophin, heat shock  
203 70 kDa protein, major vault protein, and multidrug resistance protein. Total protease and protease inhibitor  
204 counts are shown in **Figure 5C**. Cathepsin F genes may have roles in nutrient digestion and remodeling of other  
205 physiologically active molecules, and Ahn et al. [26] reported differential expression of cathepsin F genes during  
206 development of *P. westermani*, and showed that most are highly immunogenic. This flagged them as prospective

207 diagnostic targets. The importance of cathepsin F for *Paragonimus* contrasts with its function in the fasciolids,  
208 where cathepsin L genes are expanded and are thought to play a more critical role in host invasion [20, 27].

209 Differential expansion of cytoskeletal molecules is of interest in the context of tegument physiology [28].  
210 Dynein is a microtubule motor protein, which transports intracellular cargo. Spectrin is an actin-binding protein,  
211 with a key role in maintenance of integrity of the plasma membrane. Dystrophin links microfilaments with  
212 extracellular matrix. The syncytial tegument of the surface of flatworms is a complex structure and a major  
213 adaptation to parasitism, and plays critical roles in nutrient uptake, immune response modulation and evasion,  
214 and other processes [28].

215 In *Paragonimus* spp., expanded gene families included heat shock proteins (HSPs), major vault proteins,  
216 and multidrug resistance proteins that play roles in maintaining cellular homeostasis under stress conditions.  
217 HSPs of flatworm parasites play a key role as molecular chaperones in the maintenance of protein homeostasis.  
218 They also are immunogenic and immunomodulatory. HSP is the most abundant family of proteins in the immature  
219 and mature egg of *Schistosoma mansoni*, and in the miracidium [29] and is highly abundant in the tegument of  
220 the adult schistosome [30]. In addition, HSP is abundant in the excretory/secretory products of the adult  
221 *Schistosoma japonicum* blood fluke [31]. HSP stimulates diverse immune cells, eliciting release of pro- and anti-  
222 inflammatory cytokines [32], binds human LDL (the purpose of which is unknown but may be associated with  
223 transport of apoprotein B or in lipid trafficking [33]) and, given these properties, HSP represents a promising  
224 vaccine and diagnostic candidate [34]. Vaults, ribonucleoprotein complexes, are highly conserved in eukaryotes.  
225 Although their exact function remains unclear, it may be associated with multidrug resistance phenotypes and  
226 with signal transduction. In *S. mansoni*, up-regulation of major vault protein has been observed during the  
227 transition from cercaria to schistosomulum and in praziquantel-resistant adult worms [35]. ATP-binding cassette  
228 transporters (ABC transporters) are essential components of cellular physiological machinery, and some ABC  
229 transporters, including P-glycoproteins, pump toxins and xenobiotics out of the cell. Overexpression of P-  
230 glycoprotein has been reported in a praziquantel-resistant *S. mansoni* [36].

### 232 Tetraspanin sequence evolution in *P. kellicotti*

233 We searched for genes that evolved under positive selection in the four *Paragonimus* spp. based on the  
234 non-synonymous to synonymous substitution rate ratio ( $d_N/d_S$ ). We conducted the branch-site test of positive

235 selection to identify adaptive gene variants that became fixed in each species [37] (**Supplementary Table S2**).

236 A tetraspanin from *P. kellicotti* (PKEL\_00573) reached statistical significance after correction for multiple testing

237 ( $d_N/d_S = 9.9$ , FDR = 0.018). Tetraspanins are small integral proteins bearing four transmembrane domains which

238 form two extracellular loops [38]. In trematodes, they are major components of the tegument at the host-parasite

239 interface [39], are highly immunogenic vaccine antigens [40, 41], and may play a role in immune evasion [42]. In

240 the tetraspanin sequence of *P. kellicotti*, we detected six amino acid sites under positive selection (**Figure 6**).

241 Five of the six sites were predicted to be located within the extracellular loops believed to interact with the

242 immune system of the host. A similar pattern of positive selection within regions that code for extracellular loops

243 has been reported in tetraspanin-23 from African *Schistosoma* species [43].

#### 244

#### 245 Gene phylogeny analysis identifies functions conserved and specific to fluke groups

246 We classified orthologous groups (OGs) based on phelogenetic distribution of proteins from each of the

247 21 species (**Figure 4**). Complete gene counts and lists per species and per OG are provided in **Supplementary**

248 **Table S3**. These results were parsed to identify the OGs containing members among the platyhelminth species,

249 and those that were conserved across all members of each group (lung, liver, and blood flukes, and other

250 platyhelminth species (**Figure 7A**). This analysis identified 256 OGs that were conserved among, and exclusive

251 to, the lung flukes (**Figures 7A and 7B**). The lung fluke-conserved and -specific genes were significantly

252 enriched for several gene ontology (GO) terms (**Table 3**; using *P. miyazakii* genes to test significance), most of

253 which were related to peptidase activity (including serine proteases which are involved in host tissue invasion,

254 anticoagulation, and immune evasion [44]), as well as “iron binding” (which may be related to novel iron

255 acquisition mechanisms from host tissue, which is not well understood in most metazoan parasites, but has been

256 described in schistosomes [45]). Lung (adult) stage RNA-Seq datasets were collected for each of the four lung

257 fluke species (accessions in **Table 1**), and reads were mapped to each of their respective genomes. Based on

258 the 1:1 gene orthologs (as defined by the previously described OG dataset), the orthologous genes across the

259 lung flukes had consistent adult-stage gene expression levels, with Pearson correlations ranging from 0.72 to

260 0.85 (**Figure 8A, 8B**).

261 Expansion of unique aspartic proteases (including those predicted to be retropepsins) and other

262 peptidases in the lung flukes may be associated with digestion of ingested blood, given the key role of this

263 category of hydrolases and their inhibitors in nutrition and digestion of hemoglobin by schistosomes, and indeed  
264 other blood-feeding worms including hookworms [46, 47]. Given that pulmonary hemorrhage and hemoptysis  
265 are cardinal signs of lung fluke infection, it can be anticipated that the lung flukes ingest host blood when localized  
266 at the ulcerous lesion induced in the pulmonary parenchyma by infection. Overall, protease counts across  
267 species were similar (**Figure 5C**) although *P. kellicotti* had substantially fewer protease inhibitors compared to  
268 the other *Paragonimus* species (34 vs 57, 62 and 66), *F. hepatica* (61) and *S. mansoni* (55). Protease inhibitors  
269 in flukes are thought to be important for creating a safe environment for the parasite inside the host by inhibiting  
270 and regulating protease activity and immunomodulation [91], so this may suggest a novel host interaction  
271 strategy by *P. kellicotti*.

272 Analysis of the adult-stage gene expression levels of the discrete protease classes (**Figure 9**) did not  
273 identify substantial differences among the *Paragonimus* species, except for a lower expression of threonine  
274 proteases in *P. kellicotti*. During the adult stage, cysteine proteases in all *Paragonimus* species exhibited  
275 significantly higher expression overall compared to *F. hepatica*, but similar expression levels to *S. mansoni*. A  
276 previous study identified immunodominant excretory-secretory cysteine proteases of adult *Paragonimus*  
277 *westermani* involved in immune evasion [48] and another study identified critical roles for excretory-secretory  
278 cysteine proteases during tissue invasion by newly excysted metacercariae of *P. westermani* [49]. The rapid  
279 diversification and critical host-interaction functions of the proteases highlights their importance, both in terms of  
280 understanding *Paragonimus* biology and in terms of identifying targets for control.

281 Functional enrichment analysis among the lung, liver and blood fluke conserved-and-exclusive OGs  
282 (**Figure 7C**) indicated that each family of fluke has evolved a distinct set of aspartic peptidases, trematode  
283 eggshell synthesis genes and saposin-like genes (which interact with lipids and are strongly immunogenic during  
284 fascioliasis [50]). The lung flukes, meanwhile, have uniquely expanded sets of serine proteases, as well as other  
285 genes families with functions including FAR1 DNA binding (a class of proteins which are important secreted  
286 host-interacting proteins in some parasitic nematodes [51]), fatty-acid binding, and ferritin-like functions  
287 (intracellular proteins involved in iron metabolism, localized in vitelline follicles and eggs [52]).

288  
289 Treatments, vaccine targets and diagnostics

290 The World Health Organization (WHO) currently recommends the use of praziquantel or, as a backup,  
291 triclabendazole for the treatment of paragonimiasis; both are highly effective for curing infections [53]. However,  
292 there are concerns about the development of resistance to these drugs; triclabendazole resistance of *P.*  
293 *westermani* was reported in a human case from Korea [54]. Furthermore, there is widespread resistance to  
294 triclabendazole in liver flukes in cattle in Australia and South America [55], and praziquantel resistance is  
295 anticipated in the future due to its widespread use as a single treatment for schistosomiasis, a worrisome  
296 situation which has encouraged the search for novel drugs [56]. The comparative analysis presented here  
297 identifies valuable putative protein targets for drug development, including *Paragonimus*-specific proteins and  
298 trematode-conserved proteins which do not share orthology to human proteins. The protein annotation data  
299 available in **Supplementary Table S1** also will enable prioritization including biological functional annotations  
300 [57, 58], protein weight and pI predictions [59], predictions of signal peptides and transmembrane domains [60]  
301 and cellular compartment localization [57], and sequence similarity matches to targets in the ChEMBL database  
302 [61]. This information can provide a starting point for future bioinformatic prioritization and drug testing.

303 Vaccination to prevent future infections would offer an attractive alternative to treatment, but development  
304 of vaccine protection against trematode infection has so far been unsuccessful and is unlikely to be practical for  
305 paragonimiasis in the near future [62]. However, the complete genome sequences and comparative analysis of  
306 the gene sets presented here provide valuable resources for future vaccine target development.

307 Pulmonary paragonimiasis is frequently mistaken for tuberculosis or pneumonia, and often patients do  
308 not shed eggs, which leads to false positive diagnoses of other conditions such as malaria or pneumonia [4, 63,  
309 64]. This highlights a pressing need for accurate, rapid and affordable diagnostic approaches for paragonimiasis,  
310 a topic which has been the focus of numerous reports. We performed BLAST sequence similarity searches of  
311 previously identified *Paragonimus* diagnostic antigen targets among the four species (**Figure 10**). These  
312 included: (i) *P. westermani* and *P. pseudoheterotremus* cysteine proteases identified in two previous studies [65,  
313 66] (matching to the same protein targets from both studies in *P. heterotremus* and *P. kellycotti*), one of which  
314 had high adult-stage expression levels in all four species [65]; (ii) three different tyrosine kinases (one of which  
315 was identified in two different studies, in *Clonorchis sinensis* and in *P. westermani* [67, 68]), all of which had  
316 relatively low gene expression levels in adult stages; (iii) a previously unannotated *P. heterotremus* ELISA  
317 antigen [69] with low expression across life cycle stages, which we now annotate as a saposin protein (which



we found to rapidly evolve among flukes [Figure 7C], and which is strongly immunogenic in fascioliasis [50]); (iv) eggshell proteins of *P. westermani* [70], for which we now provide full-length sequences. We observed that this gene was conserved across and specific to the lung flukes, with lower gene expression in the young adult stage (*P. heterotremus*), but higher expression in the adult stages of all species; (v) among serodiagnostic *P. kellicotti* antigens based on a transcriptome assembly and proteomic evidence [16], we identified the top 10 of the 25 prioritized transcripts that best matched between the transcript sequence and the newly annotated draft genome of *P. kellicotti*. Thereafter, the full-length gene sequence in *P. kellicotti* was employed to query the other species. Several of these were highly expressed in the adult stage of all four species, including one that is fluke specific (PKEL\_05597). However, not all of these had high sequence conservation across all species, with two only having weak hits in *P. heterotremus* (PKEL\_00171 and PKEL\_01872).

As a result of this newly developed genomic resource for the lung flukes, previously identified diagnostic targets were identified with full gene sequences across all four species. The complete gene sequences, conservation information and transcriptomic gene expression data for these target proteins can allow for optimization of the targets for diagnostic testing that is effective on species spanning the genus (Figure 10). This is noteworthy given the absence of a standardized, commercially-available test for serodiagnosis for human paragonimiasis.

## Conclusion

To substantially improve our understanding of the lung flukes at the molecular level, we sequenced, assembled, annotated and compared draft genomes of four species of *Paragonimus*, three from Asia (*P. miyazakii*, *P. westermani* from Japan, *P. heterotremus*) and one from North America (*P. kellicotti*), thereby providing novel and valuable genomic resources across these important parasites for the first time. We have utilized these new resources to compare and analyze phylogenies, to identify gene sets and biological functions associated with parasitism in lung flukes, and to contribute a key resource for future investigation into host-parasite interactions for these poorly-understood agents of neglected tropical disease. Our identification of previously prioritized *Paragonimus* diagnostic markers in each of the four lung fluke species revealed that the same protein targets were identified in multiple studies, and hence the availability of full gene sequences now should facilitate diagnostic assays aiming for reactivity across all species of lung fluke. Overall, the novel genomic and

346 transcriptomic resources developed here will be invaluable for research on paragonimiasis, guiding experimental  
347 design and generation of novel hypotheses.

## 349 **Methods**

### 350 Parasite specimens

351 Samples of DNA and RNA of *Paragonimus westermani* were sourced in Japan. *Paragonimus*  
352 *heterotremus* (LC strain, Vietnam) were recovered from a cat experimentally infected with metacercariae from  
353 Lai Chau province, northern Vietnam (70% ethanol preserved; whole worm). *Paragonimus miyazakii*  
354 metacercariae were recovered from freshwater crabs (*Geothelphusa dehaani*), collected in Shizuoka Prefecture,  
355 central Japan [15], and were raised to adulthood in rats. DNA and RNA samples were prepared for each of the  
356 (pre-)adult flukes recovered from the lungs and from the pleural and peritoneal cavities of experimentally infected  
357 rats. *Paragonimus kellicotti* adult worms for genome sequencing were recovered from the lungs of Mongolian  
358 gerbils infected in the laboratory with metacercariae recovered from Missouri crayfish [71].

### 360 Genome sequencing, assembly and annotation

361 DNA and RNA samples were collected from parasites of four distinct *Paragonimus* species: *P. miyazakii*  
362 (Japan), *P. heterotremus* (LC strain, Vietnam), *P. kellicotti* (Missouri, USA) and *Paragonimus westermani*  
363 (Japan). Illumina DNA sequencing produced fragments, 3kb- and 8kb-insert whole-genome shotgun libraries,  
364 and PacBio reads were generated for *P. kellicotti*. The sequences were generated on the Illumina platform and  
365 assembled using Allpaths\_LG [72]. Scaffolding was improved using an in-house tool called Pygap (gap closure  
366 tool), the Pyramid assembler with Illumina paired reads to close gaps and extend contigs, and L\_RNA\_scaffolder  
367 [73] which uses transcript alignments to improve contiguity. For *P. kellicotti*, Nanocorr [74] was used to perform  
368 error correction on the PacBio data and PBJelly was used to fill gaps and improve the Illumina allpaths assembly  
369 using the PacBio reads [75]. The nuclear genomes were annotated using the MAKER pipeline v2.31.8 [76].  
370 Repetitive elements were softmasked with RepeatMasker v4.0.6 using a species-specific repeat library created  
371 by RepeatModeler v1.0.8, RepBase repeat libraries [77], and a list of known transposable elements provided by  
372 MAKER [76]. RNA-seq reads were aligned to their respective genome assemblies and assembled using  
373 StringTie v1.2.4 [78] (*P. miyazakii* samples collected from stages in the liver, peritoneal cavity [2 replicates], lung

374 (adult) and pleural cavity; *P. heterotremus* samples from adults and young adults [2 replicates]; *P. westermani*  
375 [16] and *P. kellicotti* [17] adult-stage transcriptomic reads were retrieved from published reports). The resulting  
376 alignments and transcript assemblies were used by BRAKER [79] and MAKER pipelines, respectively, as  
377 extrinsic evidence. In addition, mRNA and EST sequences for each species were retrieved from NCBI, and were  
378 provided to MAKER as protein homology evidence along with protein sequences from UniRef100 [80]  
379 (Trematoda-specific, n=205,161) and WormBase ParaSite WBPS7 [81]. *Ab initio* gene predictions from BRAKER  
380 v2 [79] and AUGUSTUS v3.2.2 (trained by BRAKER and run within MAKER) were refined using the transcript  
381 and protein evidence. Previously unpredicted exons and UTRs were added, and split models were merged. The  
382 best-supported gene models were chosen based on Annotation Edit Distance (AED) [82]. To reduce false  
383 positives, gene predictions without supporting evidence were excluded in the final annotation build, with the  
384 exception of those encoding Pfam domains, as detected by InterProScan v5.19 [57]. These Pfam encoding  
385 domains were rescued in order to improve the annotation accuracy overall by balancing sensitivity and specificity  
386 [76, 83]. Gene products were named using PANNZER2 [84] and sma3s v2 [85]. **Table 1** provides details of  
387 database accessions for the genomes. The completeness of annotated gene sets was assessed using BUSCO  
388 v3.0, eukaryota\_odb9 [19]. Gene Ontology (GO), KEGG and protease annotations were performed using  
389 InterProScan v5.19 [57], GhostKOALA [58], and MEROPS [86], respectively. ExPASy was used to perform  
390 protein weight and pi predictions [59], SignalP was used to predict predictions signal peptides and  
391 transmembrane domains [60], and gene product localization was predicted using the “cellular component” Gene  
392 Ontology annotations provided by InterProScan [57].

393 Functional enrichment testing was performed using GOSTATS [87] for GO enrichment and negative  
394 binomial distribution tests for InterPro domain enrichment (minimum 3 annotated genes required for significant  
395 enrichment). Ribosomal RNAs and tRNAs were annotated using RNAmmer v1.2.1 [88] and tRNAscan-SE v1.23  
396 [89], respectively. Genome characteristics and statistics including CDS, numbers and lengths of genes, exons  
397 and introns were defined using the longest complete mRNA (with start and stop codon) for each gene. Across  
398 the four species of *Paragonimus*, complete mRNAs were found for an average of 86.2% of all annotated genes.

399 Assembly of the mitochondrial genome of *P. kellicotti* was achieved using CANU [90] to align PacBio  
400 long-reads, followed by error-correction using Pilon [91].

401 MUMmer v4.0 [92] was used to estimate the level of genetic divergence between *P. westermanni* samples  
402 from Japan and India. Nucmer was run first to generate genome alignments using draft assembly sequences.  
403 Dnadiff was then used to calculate the average sequence identity between the genomes considering only 1-to-  
404 1 alignments.

#### 406 Transcriptome datasets and gene functional annotations

407 RNA-seq datasets were trimmed for adapters [93] and aligned [94] to their respective genome  
408 assemblies, and gene expression levels (FPKM) were quantified per gene per sample in each of the four species  
409 [95]. Interpro domains and Gene Ontology (GO) terms [57], KEGG enzymes [58], and protease [86] annotations  
410 of the genes were used to identify putative functions of genes of interest and perform pathway enrichment [87].  
411 All raw RNA-Seq fastq files were uploaded to the NCBI Sequence Read Archive (SRA [18]), and complete  
412 sample metadata and accession information are provided in **Table 1. Supplementary Table S1** provides, for  
413 each of the species, complete gene lists and gene expression levels for each of the RNA-Seq samples. Complete  
414 functional annotations for every gene are also provided for *P. miyazakii* in this table.

#### 416 Repeat analysis

417 RepeatModeler v1.0.8 (with WU-BLAST as its search engine) was used to build, refine and classify  
418 consensus models of putative interspersed repeats for each species. With the resulting repeat libraries, genomic  
419 sequences were screened using RepeatMasker v4.0.6 in “slow search” mode to generate a detailed annotation  
420 of the interspersed and simple repeats. Per-copy distances to consensus were calculated (Kimura 2-parameter  
421 model, excluding CpG sites) and were plotted as repeat landscapes where divergence distribution reflected the  
422 activity of transposable elements (TE) on a relative time scale per genome using the calcDivergenceFromAlign.pl  
423 and createRepeatLandscape.pl scripts included in the RepeatMasker package.

#### 425 Gene family evolution

426 Orthologous groups (OG) of genes of 21 species were inferred with OrthoFinder v1.1.4 [96] using the longest  
427 isoform for each gene (*Paragonimus* genome source information in **Table 1**; Worm gene sets were retrieved  
428 from WormBase ParaSite in June 2017 [81]; Outgroup species gene sets were retrieved from Ensembl in June

2017 [97]). CAFE method [25] was employed to model gene gain and loss while accounting for the species' phylogenetic history based on an ultrametric species tree and the number of gene copies found in each species for each gene family. Birth-death ( $\lambda$ ) parameters were estimated and the statistical significance of the observed family size differences among taxa were assessed. Results from OrthoFinder [96] were parsed to identify the OGs of interest based on conservation, including the lung fluke-conserved, liver fluke-conserved and blood fluke-conserved OGs and gene sets per species. **Supplementary Table S3** provides details of full OG counts per species and gene membership.

We used PosiGene [98] to search genome-wide for genes that evolved under positive selection based on the non-synonymous to synonymous substitution ratio. TMMOD [99] and Protter [100] were used for transmembrane helical topology prediction and visualization, respectively. We searched for genes that evolved under positive selection in the four *Paragonimus* spp. based on the non-synonymous to synonymous substitution rate ratio ( $d_N/d_S$ ). We conducted the branch-site test of positive selection to identify adaptive gene variants that became fixed in each species [37].

#### Previously identified *Paragonimus* diagnostic antigen search

Nucleotide sequences (or, if unavailable, amino acid sequences) were retrieved from each of the cited publications (**Figure 10**). Diamond blastx (nucleotides; v0.9.9.110) or Diamond blastp (amino acids; v0.9.9.110) were used to identify the top hit gene in each *Paragonimus* genome annotation (default settings). The best BLAST E-value was used to identify the top match, followed by top bitscore, length and % ID in the case of ties. For the top 25 *P. kellicotti* immunodominant antigen transcripts identified in McNulty et al, 2014 [17], matches were identified between the assembled transcript and the annotated gene. For the other three species, the BLAST searches are performed against the identified *P. kellicotti* gene, and not the original transcript sequence.

#### RNAseq-based gene expression profiling

After adapter trimming using Trimmomatic v0.36 [93], RNA-seq reads were aligned to their respective genome assemblies using the STAR aligner [94] (2-pass mode, basic). All raw RNA-Seq fastq files were uploaded to the NCBI Sequence Read Archive (SRA [18]), and complete sample metadata and accession information are provided in **Table 1**. Read fragments (read pairs or single reads) were quantified per gene per

457 sample using featureCounts (version 1.5.1) [95]. FPKM (fragments per kilobase of gene length per million reads  
458 mapped) normalization was also performed. Pearson correlation-based RNA-Seq sample clustering was  
459 performed in R (using the hclust package, complete linkage).

## 461 Statistics

462 ANOVA analysis followed by Tukey's HSD post-hoc testing was performed to compare genome statistics  
463 and protease expression between species (**Figure 2, Figure 9**). Because comparisons for the genome statistics  
464 by *t* tests involved large numbers of values, which can falsely indicate positive statistical significance, a random  
465 selection of 100 values from each species was used (excluding the upper and lower 1% of data to avoid outliers).  
466 Letter labels above the species indicate statistical groups, i.e., if two species share the same letter then they  
467 were not statistically significant from each other.

## 469 **Availability of Supporting Data**

470 Genomic raw reads, genome assemblies, genome annotations, and raw transcriptomic (RNA-Seq) fastq files  
471 were uploaded and are available for download from the NCBI Sequence Read Archive (SRA [18]), with all  
472 accession numbers and relevant metadata provided in **Table 1. Supplementary Table S1** provides, for each of  
473 the species, complete gene lists and gene expression levels for each of the RNA-Seq samples. Other data  
474 further supporting this work are openly available in the GigaScience repository, GigaDB [101].

## 476 **Declarations**

### 478 List of Abbreviations

479 FPKM - Fragments Per Kilobase of gene length per Million reads mapped (gene expression level)

480 OG - Orthologous Group

481 TE – Transposable Elements

### 483 Consent for Publication

484 Not Applicable.

485  
486  
487  
488  
489  
490  
491  
492  
493  
494  
495  
496  
497  
498  
499  
500  
501  
502  
503  
504  
505  
506  
507  
508  
509  
510  
511

## Competing Interests

The authors declare that they have no competing interests.

## Funding

Sequencing of the genomes was supported by the ‘Sequencing the etiological agents of the Food-Borne Trematodiasis’ project (National Institutes of Health - National Human Genome Research Institute award number U54HG003079). Comparative genome analysis was funded by grants National Institutes of Health - National Institute of Allergy and Infectious Diseases AI081803 and National Institutes of Health - National Institute of General Medical Sciences GM097435 to M.M. Parasite material from Thailand was supported by Distinguished Research Professor Grant (WM), Thailand Research Fund (Grant no. DPG6280002).

## Author’s Contributions

1. **Conceptualization:** MM PJB.
2. **Formal analysis:** BAR YJC SNM HJ JM.
3. **Funding acquisition:** PJB MM.
4. **Methodology:** PJB PUF DB MM.
5. **Resources:** MM TA HS THL PND WM DB PUF.
6. **Visualization:** BAR YJC.
7. **Writing – original draft:** BAR YJC MM.
8. **Writing – review & editing:** DB PJB PUF MM.

## Acknowledgements

We gratefully acknowledge assistance provided by Xu Zhang and Kymberlie Pepin with genome assembly and annotation and by Rahul Tyagi for figure graphics. We thank Kurt Curtis for his help generating *P. kellicotti* parasite material.

- 514 1. Furst T, Keiser J and Utzinger J. Global burden of human food-borne trematodiasis: a systematic  
515 review and meta-analysis. *Lancet Infect Dis.* 2012;12 3:210-21. doi:10.1016/S1473-3099(11)70294-8.
- 516 2. Utzinger J, Becker SL, Knopp S, Blum J, Neumayr AL, Keiser J, et al. Neglected tropical diseases:  
517 diagnosis, clinical management, treatment and control. *Swiss Med Wkly.* 2012;142:w13727.  
518 doi:10.4414/smw.2012.13727.
- 519 3. Blair D. Paragonimiasis. *Adv Exp Med Biol.* 2014;766:115-52. doi:10.1007/978-1-4939-0915-5\_5.
- 520 4. Furst T, Sayasone S, Odermatt P, Keiser J and Utzinger J. Manifestation, diagnosis, and management  
521 of foodborne trematodiasis. *BMJ.* 2012;344:e4093. doi:10.1136/bmj.e4093.
- 522 5. Lv S, Zhang Y, Steinmann P, Zhou XN and Utzinger J. Helminth infections of the central nervous  
523 system occurring in Southeast Asia and the Far East. *Adv Parasitol.* 2010;72:351-408. doi:S0065-  
524 308X(10)72012-1 [pii]
- 525 6. Sripa B, Kaewkes S, Intapan PM, Maleewong W and Brindley PJ. Food-borne trematodiasis in  
526 Southeast Asia epidemiology, pathology, clinical manifestation and control. *Adv Parasitol.* 2010;72:305-  
527 50. doi:S0065-308X(10)72011-X [pii]
- 528 7. Blair D, Xu ZB and Agatsuma T. Paragonimiasis and the genus *Paragonimus*. *Adv Parasitol.*  
529 1999;42:113-222.
- 530 8. Blair D, Davis GM and Wu B. Evolutionary relationships between trematodes and snails emphasizing  
531 schistosomes and paragonimids. *Parasitology.* 2001;123:S229-S43. doi:Doi  
532 10.1017/S003118200100837x.
- 533 9. Attwood SW, Upatham ES, Meng XH, Qiu DC and Southgate VR. The phylogeography of Asian  
534 *Schistosoma* (Trematoda: Schistosomatidae). *Parasitology.* 2002;125 Pt 2:99-112.  
535 doi:10.1017/s0031182002001981.
- 536 10. Doanh NP, Tu AL, Bui TD, Loan TH, Nonaka N, Horii Y, et al. Molecular and morphological variation of  
537 *Paragonimus westermani* in Vietnam with records of new second intermediate crab hosts and a new  
538 locality in a northern province. *Parasitology.* 2016;143 12:1639-46. doi:10.1017/S0031182016001219.
- 539 11. Oey H, Zakrzewski M, Narain K, Devi KR, Agatsuma T, Nawaratna S, et al. Whole-genome sequence  
540 of the oriental lung fluke *Paragonimus westermani*. *Gigascience.* 2019;8 1  
541 doi:10.1093/gigascience/giy146.
- 542 12. Blair D, Chang Z, Chen M, Cui A, Wu B, Agatsuma T, et al. *Paragonimus skrjabini* Chen, 1959  
543 (Digenea: Paragonimidae) and related species in eastern Asia: a combined molecular and  
544 morphological approach to identification and taxonomy. *Syst Parasitol.* 2005;60 1:1-21.  
545 doi:10.1007/s11230-004-1378-5.
- 546 13. Lane MA, Marcos LA, Onen NF, Demertzis LM, Hayes EV, Davila SZ, et al. *Paragonimus kellicotti*  
547 flukes in Missouri, USA. *Emerg Infect Dis.* 2012;18 8:1263-7. doi:10.3201/eid1808.120335.
- 548 14. Fischer PU and Weil GJ. North American paragonimiasis: epidemiology and diagnostic strategies.  
549 *Expert Rev Anti-Infe.* 2015;13 6:779-86. doi:10.1586/14787210.2015.1031745.
- 550 15. Blair D, Nawa Y, Mitreva M and Doanh PN. Gene diversity and genetic variation in lung flukes (genus  
551 *Paragonimus*). *Trans R Soc Trop Med Hyg.* 2016;110 1:6-12. doi:10.1093/trstmh/trv101.
- 552 16. Li BW, McNulty SN, Rosa BA, Tyagi R, Zeng QR, Gu KZ, et al. Conservation and diversification of the  
553 transcriptomes of adult *Paragonimus westermani* and *P. skrjabini*. *Parasit Vectors.* 2016;9:497.  
554 doi:10.1186/s13071-016-1785-x.
- 555 17. McNulty SN, Fischer PU, Townsend RR, Curtis KC, Weil GJ and Mitreva M. Systems biology studies of  
556 adult paragonimus lung flukes facilitate the identification of immunodominant parasite antigens. *PLoS  
557 Negl Trop Dis.* 2014;8 10:e3242. doi:10.1371/journal.pntd.0003242.
- 558 18. Leinonen R, Sugawara H, Shumway M and on behalf of the International Nucleotide Sequence  
559 Database C. The Sequence Read Archive. *Nucleic Acids Res.* 2011;39 Database issue:D19-D21.  
560 doi:10.1093/nar/gkq1019.
- 561 19. Waterhouse RM, Seppey M, Simao FA, Manni M, Ioannidis P, Klioutchnikov G, et al. BUSCO  
562 applications from quality assessments to gene prediction and phylogenomics. *Mol Biol Evol.* 2017;  
563 doi:10.1093/molbev/msx319.



- 564 20. Choi YJ, Fontenla S, Fischer PU, Le TH, Costabile A, Blair D, et al. Adaptive Radiation of the Flukes of  
565 the Family Fasciolidae Inferred from Genome-Wide Comparisons of Key Species. *Mol Biol Evol.*  
566 2020;37 1:84-99. doi:10.1093/molbev/msz204.
- 567 21. Stapley J, Santure AW and Dennis SR. Transposable elements as agents of rapid adaptation may  
568 explain the genetic paradox of invasive species. *Mol Ecol.* 2015;24 9:2241-52. doi:10.1111/mec.13089.
- 569 22. Schrader L and Schmitz J. The impact of transposable elements in adaptive evolution. *Mol Ecol.* 2018;  
570 doi:10.1111/mec.14794.
- 571 23. Chenais B, Caruso A, Hiard S and Casse N. The impact of transposable elements on eukaryotic  
572 genomes: from genome size increase to genetic adaptation to stressful environments. *Gene.* 2012;509  
573 1:7-15. doi:10.1016/j.gene.2012.07.042.
- 574 24. Prasad PK, Tandon V, Biswal DK, Goswami LM and Chatterjee A. Phylogenetic reconstruction using  
575 secondary structures and sequence motifs of ITS2 rDNA of *Paragonimus westermani* (Kerbert, 1878)  
576 Braun, 1899 (Digenea: Paragonimidae) and related species. *BMC Genomics.* 2009;10 Suppl 3:S25.  
577 doi:10.1186/1471-2164-10-S3-S25.
- 578 25. Han MV, Thomas GW, Lugo-Martinez J and Hahn MW. Estimating gene gain and loss rates in the  
579 presence of error in genome assembly and annotation using CAFE 3. *Mol Biol Evol.* 2013;30 8:1987-  
580 97. doi:10.1093/molbev/mst100.
- 581 26. Ahn CS, Na BK, Chung DL, Kim JG, Kim JT and Kong Y. Expression characteristics and specific  
582 antibody reactivity of diverse cathepsin F members of *Paragonimus westermani*. *Parasitol Int.* 2015;64  
583 1:37-42. doi:10.1016/j.parint.2014.09.012.
- 584 27. McNulty SN, Tort JF, Rinaldi G, Fischer K, Rosa BA, Smircich P, et al. Genomes of *Fasciola hepatica*  
585 from the Americas Reveal Colonization with *Neorickettsia* Endobacteria Related to the Agents of  
586 Potomac Horse and Human Sennetsu Fevers. *PLoS Genet.* 2017;13 1:e1006537.  
587 doi:10.1371/journal.pgen.1006537.
- 588 28. Jones MK, Gobert GN, Zhang L, Sunderland P and McManus DP. The cytoskeleton and motor proteins  
589 of human schistosomes and their roles in surface maintenance and host-parasite interactions.  
590 *Bioessays.* 2004;26 7:752-65. doi:10.1002/bies.20058.
- 591 29. Mathieson W and Wilson RA. A comparative proteomic study of the undeveloped and developed  
592 *Schistosoma mansoni* egg and its contents: the miracidium, hatch fluid and secretions. *Int J Parasitol.*  
593 2010;40 5:617-28. doi:10.1016/j.ijpara.2009.10.014.
- 594 30. Sotillo J, Pearson M, Becker L, Mulvenna J and Loukas A. A quantitative proteomic analysis of the  
595 tegumental proteins from *Schistosoma mansoni* schistosomula reveals novel potential therapeutic  
596 targets. *Int J Parasitol.* 2015;45 8:505-16. doi:10.1016/j.ijpara.2015.03.004.
- 597 31. Liu F, Cui SJ, Hu W, Feng Z, Wang ZQ and Han ZG. Excretory/secretory proteome of the adult  
598 developmental stage of human blood fluke, *Schistosoma japonicum*. *Mol Cell Proteomics.* 2009;8  
599 6:1236-51. doi:10.1074/mcp.M800538-MCP200.
- 600 32. Kolinski T, Marek-Trzonkowska N, Trzonkowski P and Siebert J. Heat shock proteins (HSPs) in the  
601 homeostasis of regulatory T cells (Tregs). *Cent Eur J Immunol.* 2016;41 3:317-23.  
602 doi:10.5114/ceji.2016.63133.
- 603 33. Pereira AS, Cavalcanti MG, Zingali RB, Lima-Filho JL and Chaves ME. Isoforms of Hsp70-binding  
604 human LDL in adult *Schistosoma mansoni* worms. *Parasitol Res.* 2015;114 3:1145-52.  
605 doi:10.1007/s00436-014-4292-z.
- 606 34. He S, Yang L, Lv Z, Hu W, Cao J, Wei J, et al. Molecular and functional characterization of a mortalin-  
607 like protein from *Schistosoma japonicum* (SjMLP/hsp70) as a member of the HSP70 family. *Parasitol*  
608 *Res.* 2010;107 4:955-66. doi:10.1007/s00436-010-1960-5.
- 609 35. Reis EV, Pereira RV, Gomes M, Jannotti-Passos LK, Baba EH, Coelho PM, et al. Characterisation of  
610 major vault protein during the life cycle of the human parasite *Schistosoma mansoni*. *Parasitol Int.*  
611 2014;63 1:120-6. doi:10.1016/j.parint.2013.10.005.
- 612 36. Messerli SM, Kasinathan RS, Morgan W, Spranger S and Greenberg RM. *Schistosoma mansoni* P-  
613 glycoprotein levels increase in response to praziquantel exposure and correlate with reduced  
614 praziquantel susceptibility. *Mol Biochem Parasitol.* 2009;167 1:54-9.  
615 doi:10.1016/j.molbiopara.2009.04.007.
- 616 37. Yang Z. PAML 4: phylogenetic analysis by maximum likelihood. *Mol Biol Evol.* 2007;24 8:1586-91.  
617 doi:10.1093/molbev/msm088.

- 618 38. Huang S, Yuan S, Dong M, Su J, Yu C, Shen Y, et al. The phylogenetic analysis of tetraspanins  
619 projects the evolution of cell-cell interactions from unicellular to multicellular organisms. *Genomics*.  
620 2005;86 6:674-84. doi:10.1016/j.ygeno.2005.08.004.
- 621 39. Chaiyadet S, Krueajampa W, Hipkaeo W, Plosan Y, Piratae S, Sotillo J, et al. Suppression of mRNAs  
622 encoding CD63 family tetraspanins from the carcinogenic liver fluke *Opisthorchis viverrini* results in  
623 distinct tegument phenotypes. *Sci Rep*. 2017;7 1:14342. doi:10.1038/s41598-017-13527-5.
- 624 40. Krautz-Peterson G, Debatis M, Tremblay JM, Oliveira SC, Da'dara AA, Skelly PJ, et al. *Schistosoma*  
625 *mansoni* Infection of Mice, Rats and Humans Elicits a Strong Antibody Response to a Limited Number  
626 of Reduction-Sensitive Epitopes on Five Major Tegumental Membrane Proteins. *PLoS Negl Trop Dis*.  
627 2017;11 1:e0005306. doi:10.1371/journal.pntd.0005306.
- 628 41. Tran MH, Pearson MS, Bethony JM, Smyth DJ, Jones MK, Duke M, et al. Tetraspanins on the surface  
629 of *Schistosoma mansoni* are protective antigens against schistosomiasis. *Nat Med*. 2006;12 7:835-40.  
630 doi:10.1038/nm1430.
- 631 42. Wu C, Cai P, Chang Q, Hao L, Peng S, Sun X, et al. Mapping the binding between the tetraspanin  
632 molecule (Sjc23) of *Schistosoma japonicum* and human non-immune IgG. *PLoS One*. 2011;6  
633 4:e19112. doi:10.1371/journal.pone.0019112.
- 634 43. Sealey KL, Kirk RS, Walker AJ, Rollinson D and Lawton SP. Adaptive radiation within the vaccine  
635 target tetraspanin-23 across nine *Schistosoma* species from Africa. *Int J Parasitol*. 2013;43 1:95-103.  
636 doi:10.1016/j.ijpara.2012.11.007.
- 637 44. Yang Y, Wen Y, Cai YN, Vallee I, Boireau P, Liu MY, et al. Serine proteases of parasitic helminths.  
638 *Korean J Parasitol*. 2015;53 1:1-11. doi:10.3347/kjp.2015.53.1.1.
- 639 45. Glanfield A, McManus DP, Anderson GJ and Jones MK. Pumping iron: a potential target for novel  
640 therapeutics against schistosomes. *Trends Parasitol*. 2007;23 12:583-8. doi:10.1016/j.pt.2007.08.018.
- 641 46. Brindley PJ, Kalinna BH, Wong JY, Bogitsh BJ, King LT, Smyth DJ, et al. Proteolysis of human  
642 hemoglobin by schistosome cathepsin D. *Mol Biochem Parasitol*. 2001;112 1:103-12.
- 643 47. Williamson AL, Brindley PJ, Abbenante G, Prociv P, Berry C, Girdwood K, et al. Cleavage of  
644 hemoglobin by hookworm cathepsin D aspartic proteases and its potential contribution to host  
645 specificity. *FASEB J*. 2002;16 11:1458-60. doi:10.1096/fj.02-0181fje.
- 646 48. Lee EG, Na BK, Bae YA, Kim SH, Je EY, Ju JW, et al. Identification of immunodominant excretory-  
647 secretory cysteine proteases of adult *Paragonimus westermani* by proteome analysis. *Proteomics*.  
648 2006;6 4:1290-300. doi:10.1002/pmic.200500399.
- 649 49. Na BK, Kim SH, Lee EG, Kim TS, Bae YA, Kang I, et al. Critical roles for excretory-secretory cysteine  
650 proteases during tissue invasion of *Paragonimus westermani* newly excysted metacercariae. *Cell*  
651 *Microbiol*. 2006;8 6:1034-46. doi:10.1111/j.1462-5822.2006.00685.x.
- 652 50. Caban-Hernandez K and Espino AM. Differential expression and localization of saposin-like protein 2 of  
653 *Fasciola hepatica*. *Acta Trop*. 2013;128 3:591-7. doi:10.1016/j.actatropica.2013.08.012.
- 654 51. Basavaraju SV, Zhan B, Kennedy MW, Liu Y, Hawdon J and Hotez PJ. Ac-FAR-1, a 20 kDa fatty acid-  
655 and retinol-binding protein secreted by adult *Ancylostoma caninum* hookworms: gene transcription  
656 pattern, ligand binding properties and structural characterisation. *Mol Biochem Parasitol*. 2003;126  
657 1:63-71.
- 658 52. Jones MK, McManus DP, Sivadorai P, Glanfield A, Moertel L, Belli SI, et al. Tracking the fate of iron in  
659 early development of human blood flukes. *Int J Biochem Cell Biol*. 2007;39 9:1646-58.  
660 doi:10.1016/j.biocel.2007.04.017.
- 661 53. World Health Organization. 2019. Accessed August 25, 2019.
- 662 54. Kyung SY, Cho YK, Kim YJ, Park JW, Jeong SH, Lee JI, et al. A paragonimiasis patient with allergic  
663 reaction to praziquantel and resistance to triclabendazole: successful treatment after desensitization to  
664 praziquantel. *Korean J Parasitol*. 2011;49 1:73-7. doi:10.3347/kjp.2011.49.1.73.
- 665 55. Kelley JM, Elliott TP, Beddoe T, Anderson G, Skuce P and Spithill TW. Current Threat of  
666 Triclabendazole Resistance in *Fasciola hepatica*. *Trends Parasitol*. 2016; doi:10.1016/j.pt.2016.03.002.
- 667 56. Mader P, Rennar GA, Ventura AMP, Grevelding CG and Schlitzer M. Chemotherapy for Fighting  
668 Schistosomiasis: Past, Present and Future. *ChemMedChem*. 2018;13 22:2374-89.  
669 doi:10.1002/cmdc.201800572.
- 670 57. Jones P, Binns D, Chang HY, Fraser M, Li W, McAnulla C, et al. InterProScan 5: genome-scale protein  
671 function classification. *Bioinformatics*. 2014;30 9:1236-40. doi:10.1093/bioinformatics/btu031

- 672 58. Kanehisa M, Sato Y and Morishima K. BlastKOALA and GhostKOALA: KEGG Tools for Functional  
673 Characterization of Genome and Metagenome Sequences. *J Mol Biol.* 2016;428 4:726-31.  
674 doi:10.1016/j.jmb.2015.11.006.
- 675 59. Artimo P, Jonnalagedda M, Arnold K, Baratin D, Csardi G, de Castro E, et al. ExPASy: SIB  
676 bioinformatics resource portal. *Nucleic Acids Res.* 2012;40 Web Server issue:W597-603.  
677 doi:10.1093/nar/gks400.
- 678 60. Almagro Armenteros JJ, Tsirigos KD, Sonderby CK, Petersen TN, Winther O, Brunak S, et al. SignalP  
679 5.0 improves signal peptide predictions using deep neural networks. *Nat Biotechnol.* 2019;37 4:420-3.  
680 doi:10.1038/s41587-019-0036-z.
- 681 61. Mendez D, Gaulton A, Bento AP, Chambers J, De Veij M, Félix E, et al. ChEMBL: towards direct  
682 deposition of bioassay data. *Nucleic Acids Res.* 2019;47 D1:D930-D40. doi:10.1093/nar/gky1075.
- 683 62. Stutzer C, Richards SA, Ferreira M, Baron S and Maritz-Olivier C. Metazoan Parasite Vaccines:  
684 Present Status and Future Prospects. *Front Cell Infect Microbiol.* 2018;8:67.  
685 doi:10.3389/fcimb.2018.00067.
- 686 63. Radzikowska E, Chabowski M and Bestry I. Tuberculosis mimicry. *Eur Respir J.* 2006;27 3:652; author  
687 reply doi:10.1183/09031936.06.00121205.
- 688 64. Eapen S, Espinal E and Firstenberg M. Delayed diagnosis of paragonimiasis in Southeast Asian  
689 immigrants: A need for global awareness. 2018;4 2:173-7. doi:10.4103/ijam.ljam\_2\_18.
- 690 65. Yang SH, Park JO, Lee JH, Jeon BH, Kim WS, Kim SI, et al. Cloning and characterization of a new  
691 cysteine proteinase secreted by *Paragonimus westermani* adult worms. *Am J Trop Med Hyg.* 2004;71  
692 1:87-92.
- 693 66. Yoonuan T, Nuamtanong S, Dekumyoy P, Phuphisut O and Adisakwattana P. Molecular and  
694 immunological characterization of cathepsin L-like cysteine protease of *Paragonimus*  
695 *pseudoheterotremus*. *Parasitol Res.* 2016;115 12:4457-70. doi:10.1007/s00436-016-5232-x.
- 696 67. Kim SH and Bae YA. Lineage-specific expansion and loss of tyrosinase genes across platyhelminths  
697 and their induction profiles in the carcinogenic oriental liver fluke, *Clonorchis sinensis*. *Parasitology.*  
698 2017;144 10:1316-27. doi:10.1017/S003118201700083X.
- 699 68. Bae YA, Kim SH, Ahn CS, Kim JG and Kong Y. Molecular and biochemical characterization of  
700 *Paragonimus westermani* tyrosinase. *Parasitology.* 2015;142 6:807-15.  
701 doi:10.1017/S0031182014001942.
- 702 69. Pothong K, Komalamisra C, Kalambaheti T, Watthanakulpanich D, Yoshino TP and Dekumyoy P.  
703 ELISA based on a recombinant *Paragonimus heterotremus* protein for serodiagnosis of human  
704 paragonimiasis in Thailand. *Parasit Vectors.* 2018;11 1:322. doi:10.1186/s13071-018-2878-5.
- 705 70. Bae YA, Kim SH, Cai GB, Lee EG, Kim TS, Agatsuma T, et al. Differential expression of *Paragonimus*  
706 *westermani* eggshell proteins during the developmental stages. *Int J Parasitol.* 2007;37 3-4:295-305.  
707 doi:10.1016/j.ijpara.2006.10.006.
- 708 71. Fischer PU, Curtis KC, Marcos LA and Weil GJ. Molecular characterization of the North American lung  
709 fluke *Paragonimus kellicotti* in Missouri and its development in Mongolian gerbils. *Am J Trop Med Hyg.*  
710 2011;84 6:1005-11. doi:10.4269/ajtmh.2011.11-0027.
- 711 72. Gnerre S, Maccallum I, Przybylski D, Ribeiro FJ, Burton JN, Walker BJ, et al. High-quality draft  
712 assemblies of mammalian genomes from massively parallel sequence data. *Proc Natl Acad Sci U S A.*  
713 2011;108 4:1513-8. doi:10.1073/pnas.1017351108.
- 714 73. Xue W, Li JT, Zhu YP, Hou GY, Kong XF, Kuang YY, et al. L\_RNA\_scaffolder: scaffolding genomes  
715 with transcripts. *BMC Genomics.* 2013;14:604. doi:10.1186/1471-2164-14-604.
- 716 74. Goodwin S, Gurtowski J, Ethe-Sayers S, Deshpande P, Schatz MC and McCombie WR. Oxford  
717 Nanopore sequencing, hybrid error correction, and de novo assembly of a eukaryotic genome. *Genome*  
718 *Res.* 2015;25 11:1750-6. doi:10.1101/gr.191395.115.
- 719 75. English AC, Richards S, Han Y, Wang M, Vee V, Qu J, et al. Mind the gap: upgrading genomes with  
720 Pacific Biosciences RS long-read sequencing technology. *PLoS One.* 2012;7 11:e47768.  
721 doi:10.1371/journal.pone.0047768.
- 722 76. Holt C and Yandell M. MAKER2: an annotation pipeline and genome-database management tool for  
723 second-generation genome projects. *BMC Bioinformatics.* 2011;12:491. doi:10.1186/1471-2105-12-  
724 491.
- 725 77. Bao W, Kojima KK and Kohany O. Repbase Update, a database of repetitive elements in eukaryotic  
726 genomes. *Mob DNA.* 2015;6:11. doi:10.1186/s13100-015-0041-9.

- 727 78. Perteua M, Perteua GM, Antonescu CM, Chang TC, Mendell JT and Salzberg SL. StringTie enables  
728 improved reconstruction of a transcriptome from RNA-seq reads. *Nat Biotechnol.* 2015;33 3:290-5.  
729 doi:10.1038/nbt.3122.
- 730 79. Hoff KJ, Lange S, Lomsadze A, Borodovsky M and Stanke M. BRAKER1: Unsupervised RNA-Seq-  
731 Based Genome Annotation with GeneMark-ET and AUGUSTUS. *Bioinformatics.* 2016;32 5:767-9.  
732 doi:10.1093/bioinformatics/btv661.
- 733 80. The UniProt C. UniProt: the universal protein knowledgebase. *Nucleic Acids Res.* 2017;45 D1:D158-  
734 D69. doi:10.1093/nar/gkw1099.
- 735 81. Howe KL, Bolt BJ, Shafie M, Kersey P and Berriman M. WormBase ParaSite - a comprehensive  
736 resource for helminth genomics. *Mol Biochem Parasitol.* 2017;215:2-10.  
737 doi:10.1016/j.molbiopara.2016.11.005.
- 738 82. Eilbeck K, Moore B, Holt C and Yandell M. Quantitative measures for the management and comparison  
739 of annotated genomes. *BMC Bioinformatics.* 2009;10:67. doi:10.1186/1471-2105-10-67.
- 740 83. Campbell MS, Law M, Holt C, Stein JC, Moghe GD, Hufnagel DE, et al. MAKER-P: a tool kit for the  
741 rapid creation, management, and quality control of plant genome annotations. *Plant Physiol.* 2014;164  
742 2:513-24. doi:10.1104/pp.113.230144.
- 743 84. Koskinen P, Toronen P, Nokso-Koivisto J and Holm L. PANNZER: high-throughput functional  
744 annotation of uncharacterized proteins in an error-prone environment. *Bioinformatics.* 2015;31 10:1544-  
745 52. doi:10.1093/bioinformatics/btu851.
- 746 85. Casimiro-Soriguer CS, Munoz-Merida A and Perez-Pulido AJ. Sma3s: A universal tool for easy  
747 functional annotation of proteomes and transcriptomes. *Proteomics.* 2017;17 12  
748 doi:10.1002/pmic.201700071.
- 749 86. Rawlings ND, Barrett AJ and Finn R. Twenty years of the MEROPS database of proteolytic enzymes,  
750 their substrates and inhibitors. *Nucleic Acids Res.* 2016;44 D1:D343-50. doi:10.1093/nar/gkv1118.
- 751 87. Falcon S and Gentleman R. Using GOstats to test gene lists for GO term association. *Bioinformatics.*  
752 2007;23 2:257-8. doi:10.1093/bioinformatics/btl567.
- 753 88. Lagesen K, Hallin P, Rodland EA, Staerfeldt HH, Rognes T and Ussery DW. RNAmmer: consistent and  
754 rapid annotation of ribosomal RNA genes. *Nucleic Acids Res.* 2007;35 9:3100-8.  
755 doi:10.1093/nar/gkm160.
- 756 89. Lowe TM and Eddy SR. tRNAscan-SE: a program for improved detection of transfer RNA genes in  
757 genomic sequence. *Nucleic Acids Res.* 1997;25 5:955-64.
- 758 90. Koren S, Walenz BP, Berlin K, Miller JR, Bergman NH and Phillippy AM. Canu: scalable and accurate  
759 long-read assembly via adaptive k-mer weighting and repeat separation. *Genome Res.* 2017;27 5:722-  
760 36. doi:10.1101/gr.215087.116.
- 761 91. Walker BJ, Abeel T, Shea T, Priest M, Abouelliel A, Sakthikumar S, et al. Pilon: an integrated tool for  
762 comprehensive microbial variant detection and genome assembly improvement. *PLoS One.* 2014;9  
763 11:e112963. doi:10.1371/journal.pone.0112963.
- 764 92. Marcais G, Delcher AL, Phillippy AM, Coston R, Salzberg SL and Zimin A. MUMmer4: A fast and  
765 versatile genome alignment system. *PLoS Comput Biol.* 2018;14 1:e1005944.  
766 doi:10.1371/journal.pcbi.1005944.
- 767 93. Bolger AM, Lohse M and Usadel B. Trimmomatic: a flexible trimmer for Illumina sequence data.  
768 *Bioinformatics.* 2014;30 15:2114-20. doi:10.1093/bioinformatics/btu170.
- 769 94. Dobin A, Davis CA, Schlesinger F, Drenkow J, Zaleski C, Jha S, et al. STAR: ultrafast universal RNA-  
770 seq aligner. *Bioinformatics.* 2013;29 1:15-21. doi:10.1093/bioinformatics/bts635.
- 771 95. Liao Y, Smyth GK and Shi W. featureCounts: an efficient general purpose program for assigning  
772 sequence reads to genomic features. *Bioinformatics.* 2014;30 7:923-30.  
773 doi:10.1093/bioinformatics/btt656.
- 774 96. Emms DM and Kelly S. OrthoFinder: solving fundamental biases in whole genome comparisons  
775 dramatically improves orthogroup inference accuracy. *Genome Biol.* 2015;16:157. doi:10.1186/s13059-  
776 015-0721-2.
- 777 97. Zerbino DR, Achuthan P, Akanni W, Amode MR, Barrell D, Bhai J, et al. Ensembl 2018. *Nucleic Acids*  
778 *Res.* 2018;46 D1:D754-D61. doi:10.1093/nar/gkx1098.
- 779 98. Sahm A, Bens M, Platzer M and Szafranski K. PosiGene: automated and easy-to-use pipeline for  
780 genome-wide detection of positively selected genes. *Nucleic Acids Res.* 2017;45 11:e100.  
781 doi:10.1093/nar/gkx179.

- 782 99. Kahsay RY, Gao G and Liao L. An improved hidden Markov model for transmembrane protein  
783 detection and topology prediction and its applications to complete genomes. *Bioinformatics*. 2005;21  
784 9:1853-8. doi:10.1093/bioinformatics/bti303.
- 785 100. Omasits U, Ahrens CH, Muller S and Wollscheid B. Protter: interactive protein feature visualization and  
786 integration with experimental proteomic data. *Bioinformatics*. 2014;30 6:884-6.  
787 doi:10.1093/bioinformatics/btt607.
- 788 101. Rosa BA; Choi YJ; McNulty SN; Jung H; Martin J; Agatsuma T; Sugiyama H; Le TH; Doanh PN;  
789 Maleewong W; Blair D; Brindley PJ; Fischer PU; Mitreva M: Supporting data for "Comparative  
790 genomics and transcriptomics of four *Paragonimus* species provide insights into lung fluke parasitism  
791 and pathogenesis" GigaScience Database. 2020. <http://dx.doi.org/10.5524/100757>.  
792

793

## 794 **Figure Captions**

795  
796 **Figure 1.** Comparisons of the overall content of the assembled *Paragonimus* genome assemblies. Comparisons  
797 are based on **(A)** length (including statistics for other sequenced trematode genomes) and **(B)** Repeat  
798 landscapes, measured using the Kimura substitution level, which indicates how much a repeat sequence has  
799 degenerated since its incorporation into the genome (i.e., how recently the repeat sequence was added). The  
800 high peak at the far left of *P. kellicotti* indicates a recent incorporation or active transposable element activity.

801  
802 **Figure 2:** Comparison of genome annotation characteristics and attributes among several species of flatworms.  
803 Attributes characterized included **(A)** Full gene lengths, including coding and noncoding sequences, **(B)** Average  
804 intron lengths per gene, **(C)** Number of exons per gene, and **(D)** Coding sequence (CDS) length per exon. *P*  
805 values and letter groupings indicating significant differences among species, as calculated using ANOVA with  
806 Tukey's HSD post-hoc test.

807  
808 **Figure 3.** Clustering of *Paragonimus* species. **(A)** Mitochondrial whole genome-based phylogeny, including  
809 previously-sequenced *Paragonimus* mitochondrial genomes (with accessions indicated). **(B)** *Paragonimus*  
810 *kellicotti* mitogenome gene structure.

811  
812 **Figure 4.** Species clustering based on single-member OPF sequences. 262,720 genes (85% of all genes across  
813 the species) were assigned to 17,953 OPFs; 2,493 genes are in 326 species-specific OPFs.

814  
815 **Figure 5.** Gene-family dynamics among platyhelminth species. **(A)** Rapidly evolving families of interest are  
816 quantified at each stage of the phylogeny, including genes gained (blue) and lost (red) relative to other species.  
817 The number of rapidly evolving genes are indicated in parentheses. **(B)** Functionally annotated gene families of  
818 interest that displayed most pronounced differential expansions or contractions. **(C)** Overall protease and  
819 protease inhibitor abundance per species.

821 **Figure 6.** Predicted transmembrane helical topology of *Paragonimus kellicotti* tetraspanin (PKEL\_00573).  
822 Amino acid sites under positive selection (red) and conserved motifs (CCG, PXSC and GC motifs in green,  
823 blue and purple, respectively). The “PXSC” motif here is represented by the “PASC” sequence.

824  
825 **Figure 7.** Orthologous Group (OG) distribution analysis. **(A)** OGs identified among groups of flukes. The OGs  
826 conserved in at least one of the species from each group are indicated in black, and the OGs conserved among  
827 all the species in the overlapping groups are indicated in red. **(B)** Counts of OGs among the four *Paragonimus*  
828 species, with *Paragonimus*-specific gene sets indicated in red text. The 256 *Paragonimus* conserved-and-  
829 specific genes are indicated with highlight. **(C)** Significant functional enrichment (Interpro domains) among the  
830 gene sets conserved among, and specific to, each major group of flukes (256, 758 and 270 OPFs in lung, liver  
831 and blood flukes, respectively), relative to the functions in the complete gene sets.

832  
833 **Figure 8.** Analysis of gene expression data for species of lung flukes of the genus *Paragonimus*. **(A)** Comparison  
834 of adult-stage gene expression levels among 1:1 orthologs shared by *P. westermani* and *P. miyazakii*. Pearson  
835 correlation = 0.79. **(B)** Pearson correlation values between all lung fluke species for the adult-stage expression  
836 levels of all 1:1 orthologous genes.

837  
838 **Figure 9.** A comparison of adult-stage protease gene expression levels in the four *Paragonimus* species, *F.*  
839 *hepatica* and *S. mansoni*.

840  
841 **Figure 10.** Gene matches, expression level and orthology for previously identified *Paragonimus* antigens. Top  
842 gene matches in each species (Diamond blastp) are shown, and the percent identity and percentage of the query  
843 sequence covered with the match are shown. Gene expression data corresponds to the matched gene for each  
844 species, and orthology data indicates the conservation of the matched proteins according to the Orthologous  
845 Group analysis (dark grey = ortholog present in at least 1 species in group). \*Query sequence was an amino  
846 acid sequence instead of a nucleotide sequence. \*\*Of the top 25 *P. kellicotti* immunodominant antigen transcripts  
847 identified by McNulty and co-workers [17], the 10 best matches are presented (in terms of % identity between

848 the assembled transcript and the annotated gene. For the other three species, the BLAST searches were  
849 performed against the orthologous gene in *P. kellicotti*, not the original transcript sequence.

850



851 **Tables**852 **Table 1.** *Paragonimus spp.* genome and RNA-Seq data accessions.**Genome assemblies, annotations and raw reads**

| Species                           | NCBI accession | Bioproject ID | Genome coverage (x) /<br>body location / stage |
|-----------------------------------|----------------|---------------|------------------------------------------------|
| <i>Paragonimus miyazakii</i>      | JTDE00000000   | PRJNA245325   | 162                                            |
| <i>Paragonimus heterotremus</i>   | LUCH00000000   | PRJNA284523   | 81                                             |
| <i>Paragonimus kellicotti</i>     | LOND00000000   | PRJNA179523   | 77 (43*)                                       |
| <i>Paragonimus westermani</i>     | JTDF00000000   | PRJNA219632   | 152                                            |
| <b>RNA-Seq dataset accessions</b> |                |               |                                                |
| <i>Paragonimus miyazakii</i>      | SRX1100074     | PRJNA245325   | Pleural cavity                                 |
|                                   | SRX1100062     | PRJNA245325   | Lung                                           |
|                                   | SRX1037170     | PRJNA245325   | Peritoneal cavity                              |
|                                   | SRX1037172     | PRJNA245325   | Peritoneal cavity                              |
|                                   | SRX1037171     | PRJNA245325   | Liver                                          |
| <i>Paragonimus heterotremus</i>   | SRX3713099     | PRJNA284523   | Adult (technical rep 1)                        |
|                                   | SRX3713100     | PRJNA284523   | Adult (technical rep 2)                        |
|                                   | SRX3713101     | PRJNA284523   | Young Adult                                    |
|                                   | SRX3713102     | PRJNA284523   | Young Adult                                    |
| <i>Paragonimus kellicotti</i>     | SRX3718311     | PRJNA179523   | Adult                                          |
|                                   | SRX3718310     | PRJNA179523   | Adult                                          |
| <i>Paragonimus westermani</i>     | SRX1507710     | PRJNA219632   | Adult                                          |

\*Pacbio dataset coverage

853

854

**Table 2:** The draft genome of *Paragonimus*: assembly, size and annotation characteristics.

| Statistic                                            | <i>Paragonimus miyazakii</i> | <i>Paragonimus heterotremus</i> | <i>Paragonimus kelicotti</i> | <i>Paragonimus westermani</i> (Japan) | <i>Paragonimus westermani</i> (India) |
|------------------------------------------------------|------------------------------|---------------------------------|------------------------------|---------------------------------------|---------------------------------------|
| <b>Assembly statistics</b>                           |                              |                                 |                              |                                       |                                       |
| Total genome length (Mb)                             | 915.8                        | 841.2                           | 696.5                        | 923.3                                 | 922.8                                 |
| Number of contigs                                    | 22,318                       | 27,557                          | 29,377                       | 22,477                                | 30,455                                |
| Mean contig size (kb)                                | 41                           | 30.5                            | 23.7                         | 41.1                                  | 30.3                                  |
| Median contig size (kb)                              | 15.1                         | 9.3                             | 10.2                         | 17.2                                  | 4.8                                   |
| Max. contig size (kb)                                | 919.8                        | 715.6                           | 826                          | 829                                   | 809.4                                 |
| N50 length (kb)                                      | 108.8                        | 92.5                            | 56.0                         | 100.8                                 | 135.2                                 |
| N50 number                                           | 2,320                        | 2,506                           | 3,316                        | 2,664                                 | 1,943                                 |
| <b>BUSCO completeness (303 genes, eukarota_odb9)</b> |                              |                                 |                              |                                       |                                       |
| Complete, single copy                                | 84.5%                        | 82.5%                           | 70.3%                        | 88.78%                                | 76.90%                                |
| Complete, duplicated                                 | 1.3%                         | 0.0%                            | 1.3%                         | 1.32%                                 | 2.31%                                 |
| Fragmented                                           | 7.6%                         | 10.9%                           | 15.2%                        | 6.27%                                 | 14.85%                                |
| Missing                                              | 6.6%                         | 6.6%                            | 13.2%                        | 3.63%                                 | 5.94%                                 |
| <b>Gene statistics</b>                               |                              |                                 |                              |                                       |                                       |
| Number of genes                                      | 12,652                       | 12,490                          | 12,853                       | 12,072                                | 12,771                                |
| Avg gene length (kb)                                 | 25.9                         | 22.6                            | 17.6                         | 24.1                                  | 18.0                                  |
| Avg CDS length (kb)                                  | 1.5                          | 1.4                             | 1.1                          | 1.4                                   | 1.4                                   |
| Avg intron length (kb)                               | 4.2                          | 4                               | 3.6                          | 4.2                                   | 4.0                                   |
| Avg # exons per gene                                 | 6.7                          | 6.2                             | 5.3                          | 6.3                                   | 5.2                                   |
| % annotated InterPro                                 | 82%                          | 85%                             | 81%                          | 87%                                   | 82%                                   |
| % annotated KEGG                                     | 40%                          | 41%                             | 34%                          | 43%                                   | 43%                                   |

**Table 3.** "Molecular Function" Gene Ontology terms enriched among *P. miyazakii* genes that are conserved among and exclusive to lung flukes.

| GO ID      | GO term name                                        | P value | # Conserved and Specific | Total # in genome |
|------------|-----------------------------------------------------|---------|--------------------------|-------------------|
| GO:0004175 | endopeptidase activity                              | 5.2E-05 | 8                        | 132               |
| GO:0008236 | serine-type peptidase activity                      | 5.6E-05 | 6                        | 67                |
| GO:0017171 | serine hydrolase activity                           | 5.6E-05 | 6                        | 67                |
| GO:0004252 | serine-type endopeptidase activity                  | 1.6E-04 | 5                        | 51                |
| GO:0070011 | peptidase activity, acting on L-amino acid peptides | 6.1E-04 | 9                        | 237               |
| GO:0008233 | peptidase activity                                  | 8.7E-04 | 9                        | 249               |
| GO:0004568 | chitinase activity                                  | 2.1E-03 | 2                        | 7                 |
| GO:0004190 | aspartic-type endopeptidase activity                | 1.1E-02 | 2                        | 16                |
| GO:0070001 | aspartic-type peptidase activity                    | 1.1E-02 | 2                        | 16                |
| GO:0008199 | ferric iron binding                                 | 1.1E-02 | 2                        | 16                |

861 **Additional Supplementary Files**

862

863 **Supplementary Table S1:** Gene expression and orthologous group data for each gene, for the four  
864 *Paragonimus* species: (A) *P. miyazakii*, (B) *P. heterotremus*, (C) *P. kellicotti*, (D) *P. westermani* (Provided as a  
865 separate MS Excel database).

866

867 **Supplementary Table S2:** Genome-wide selection scan results for all *Paragonimus* species (Provided as a  
868 separate MS Excel database).

869

870 **Supplementary Table S3:** Complete Orthologous Group (OG) counts per species, gene membership and  
871 average *Paragonimus* gene expression levels per RNA-Seq sample (Provided as a separate MS Excel  
872 database).

873

874 **Supplementary Text S1.** Commands and parameters for analyses (Provided as a separate MS Word file).

875

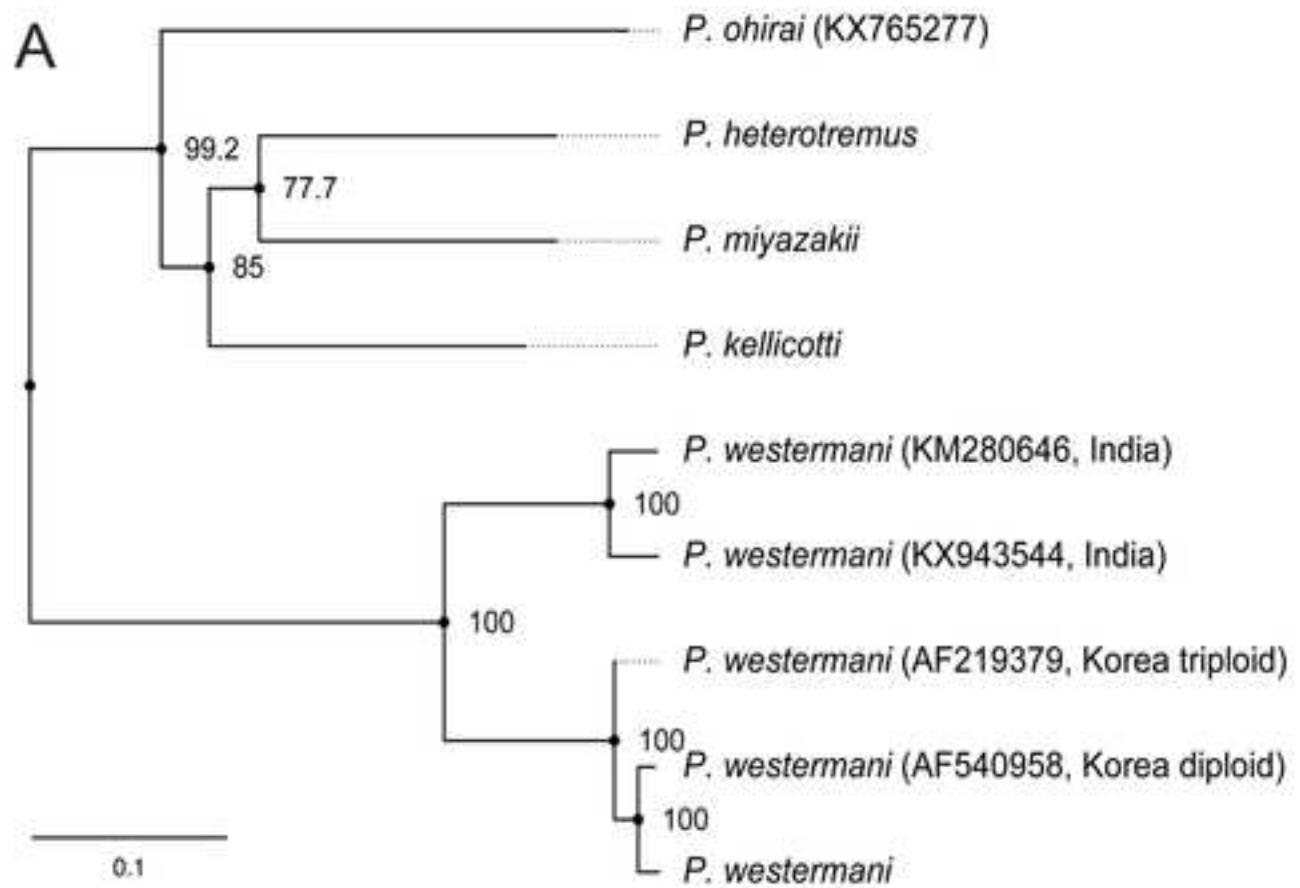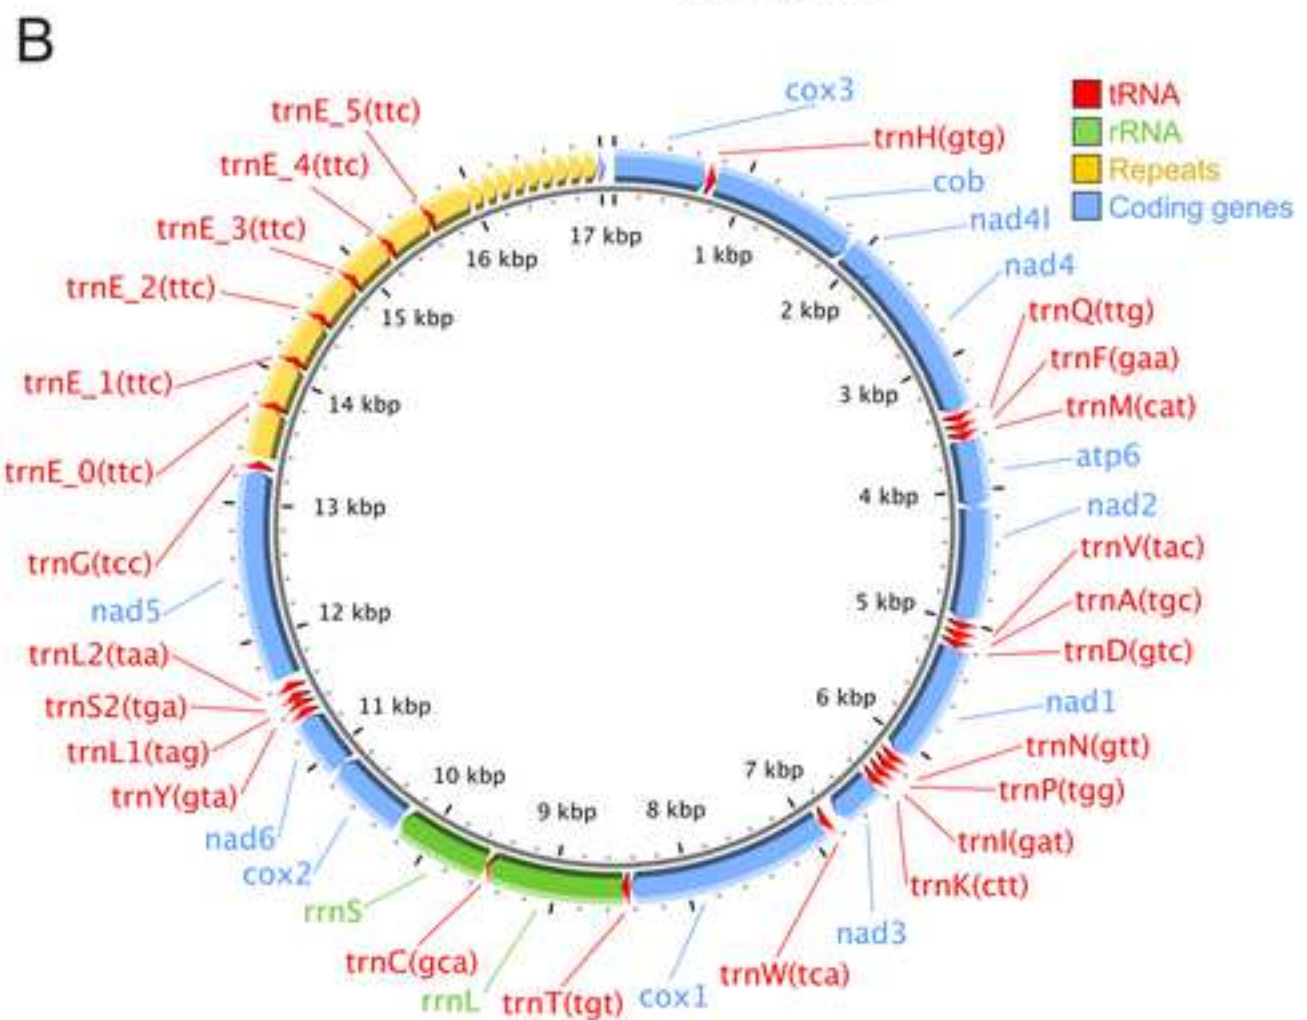

Figure 4

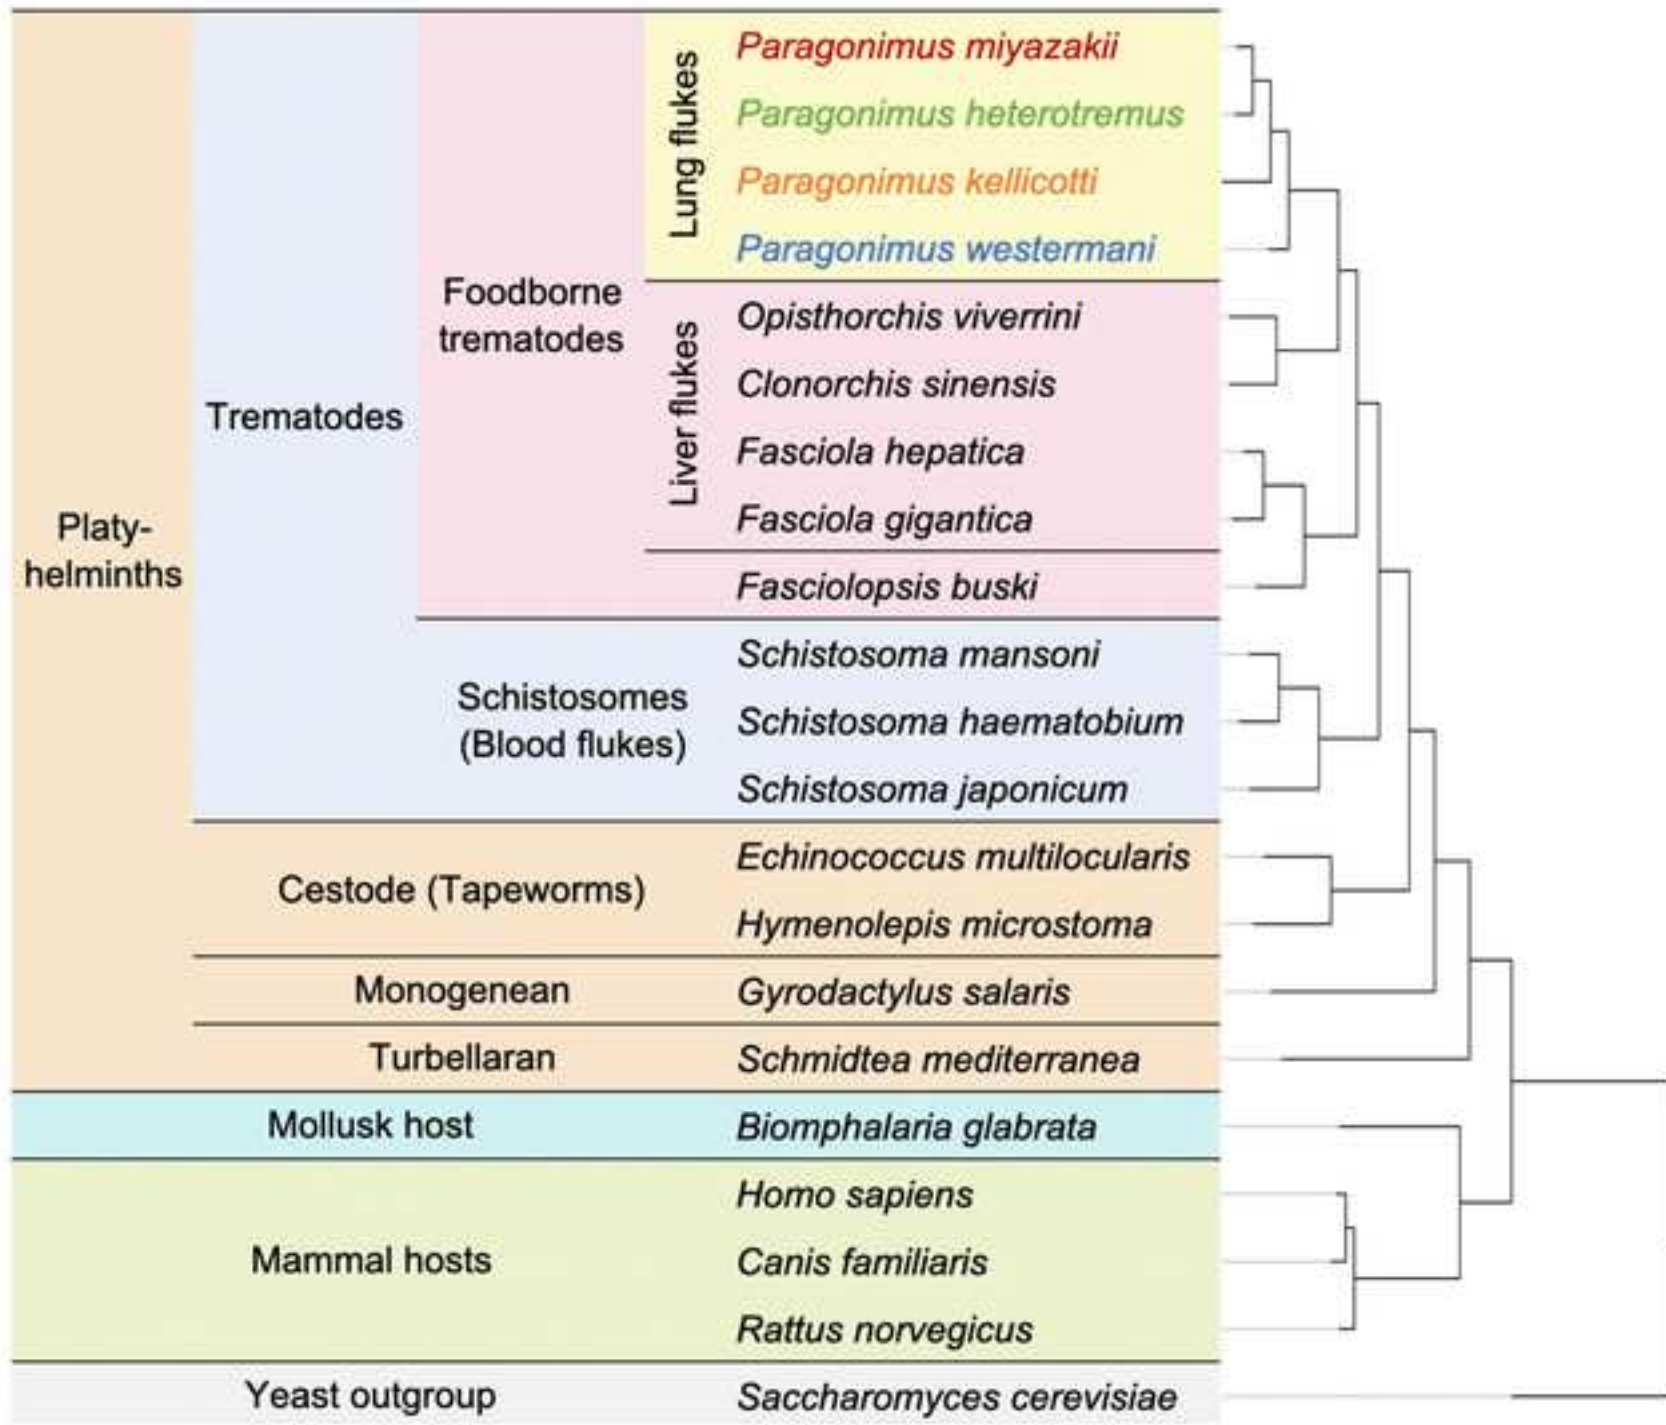

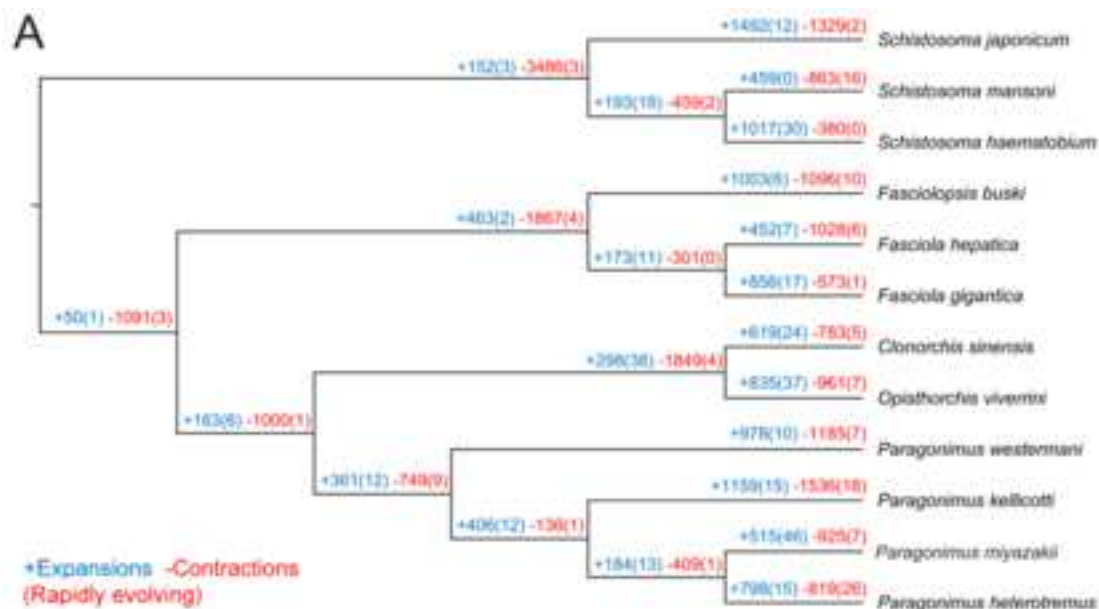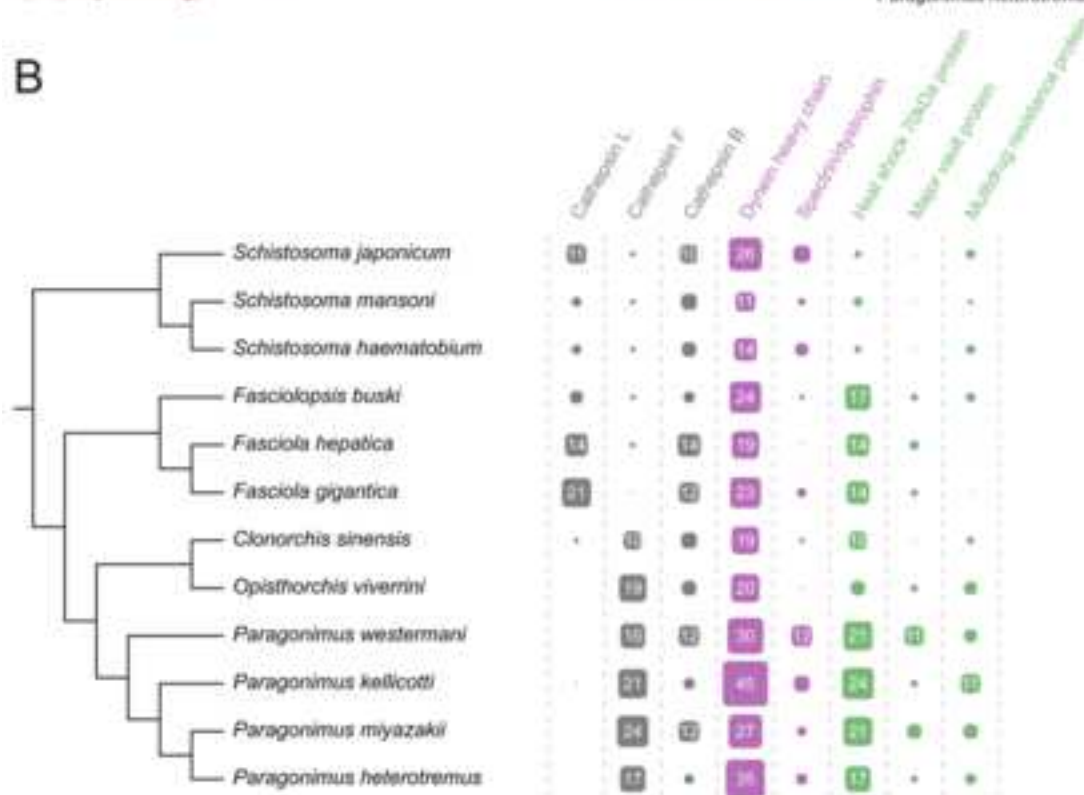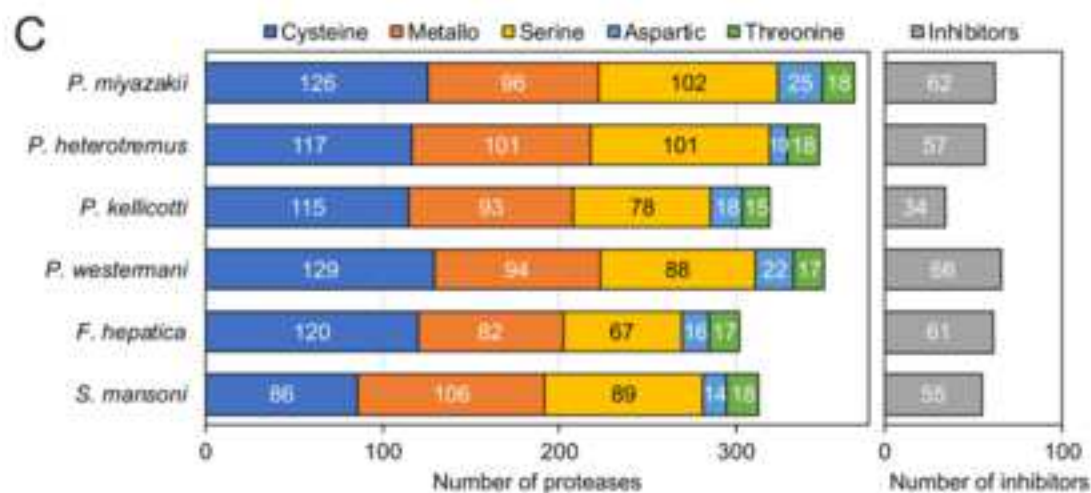



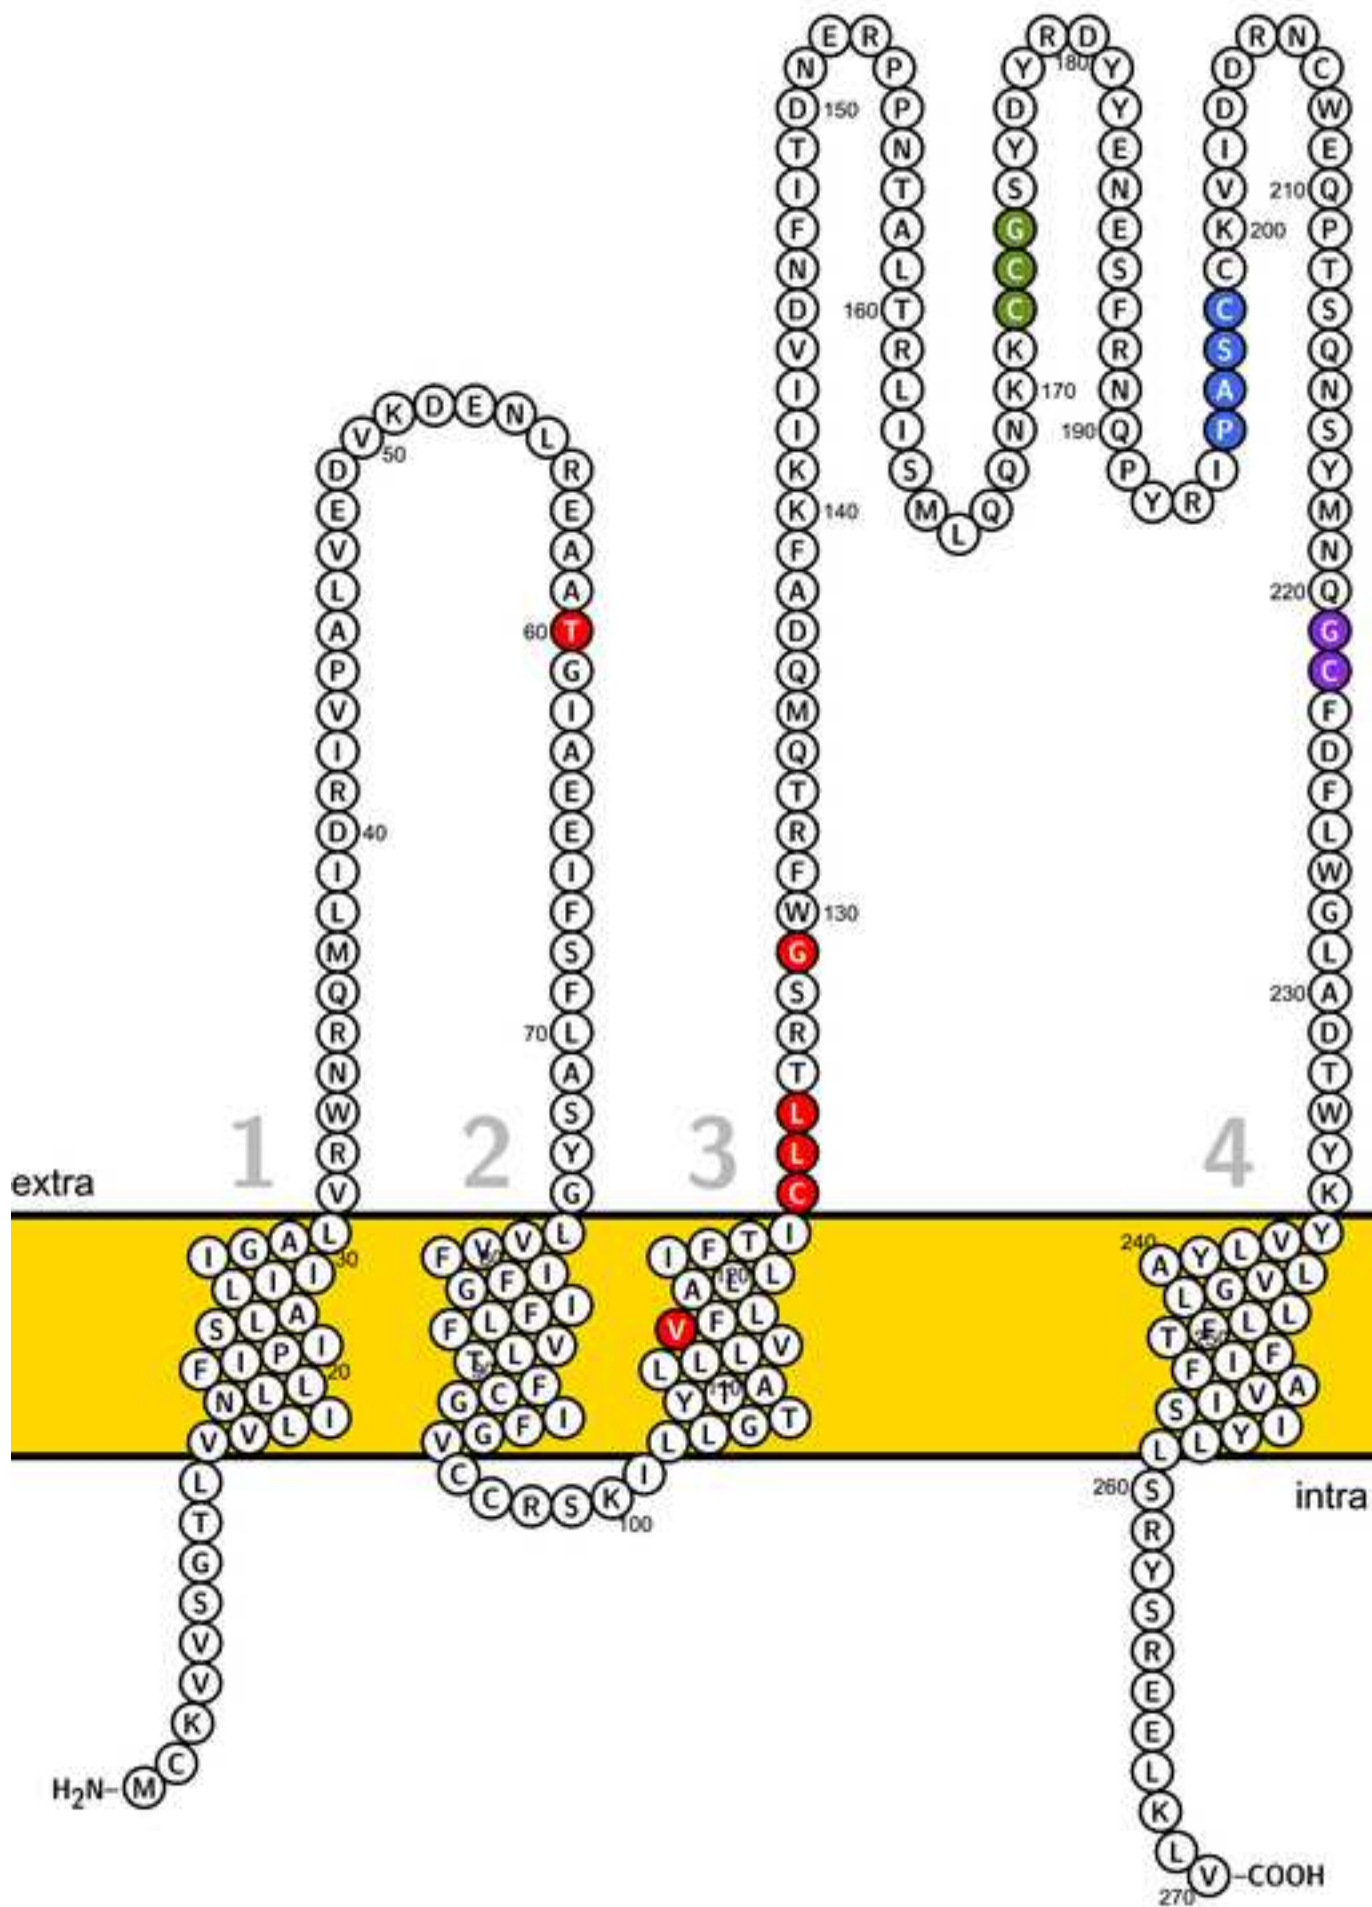



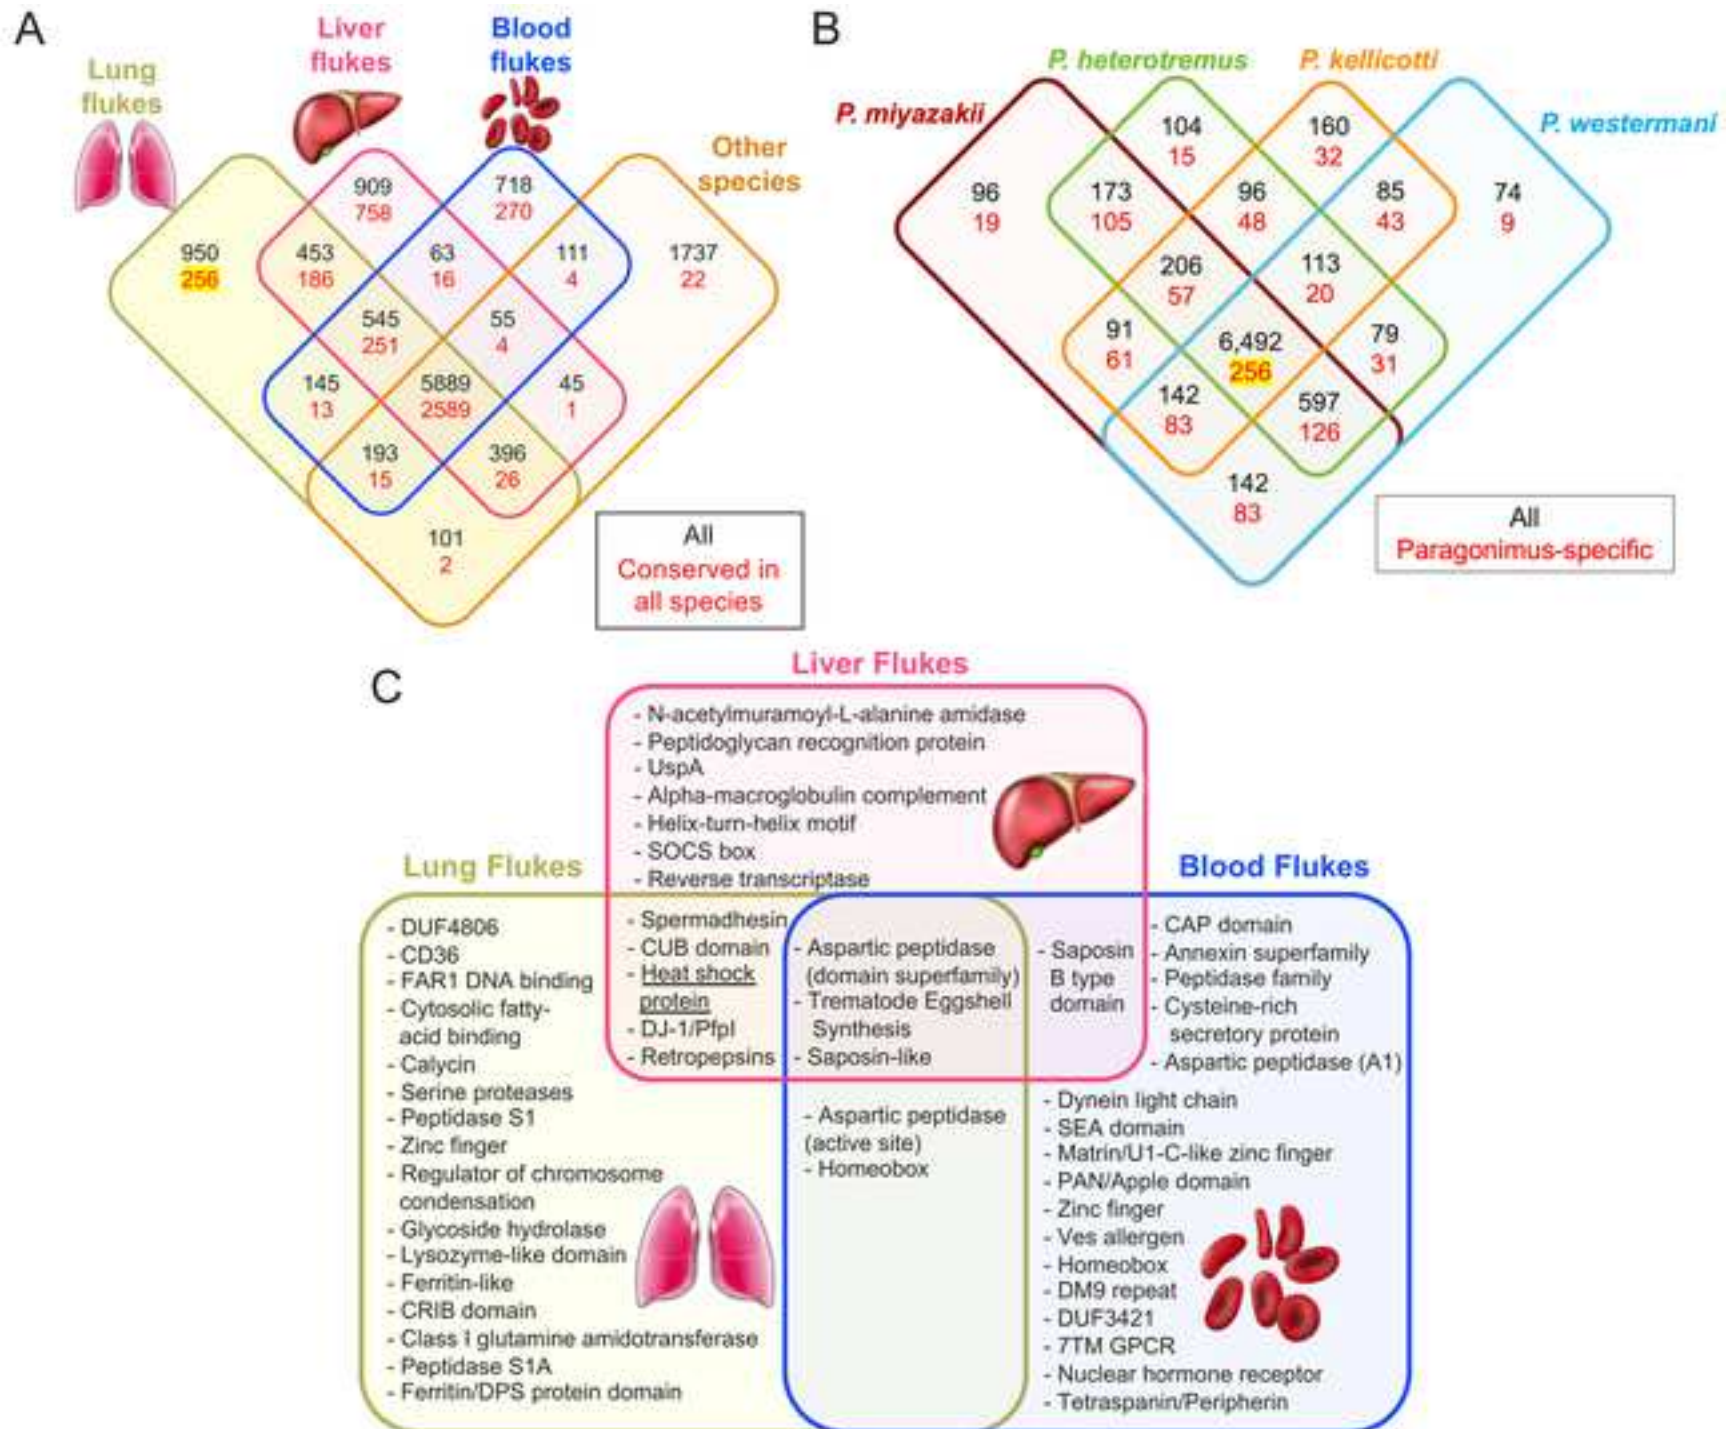

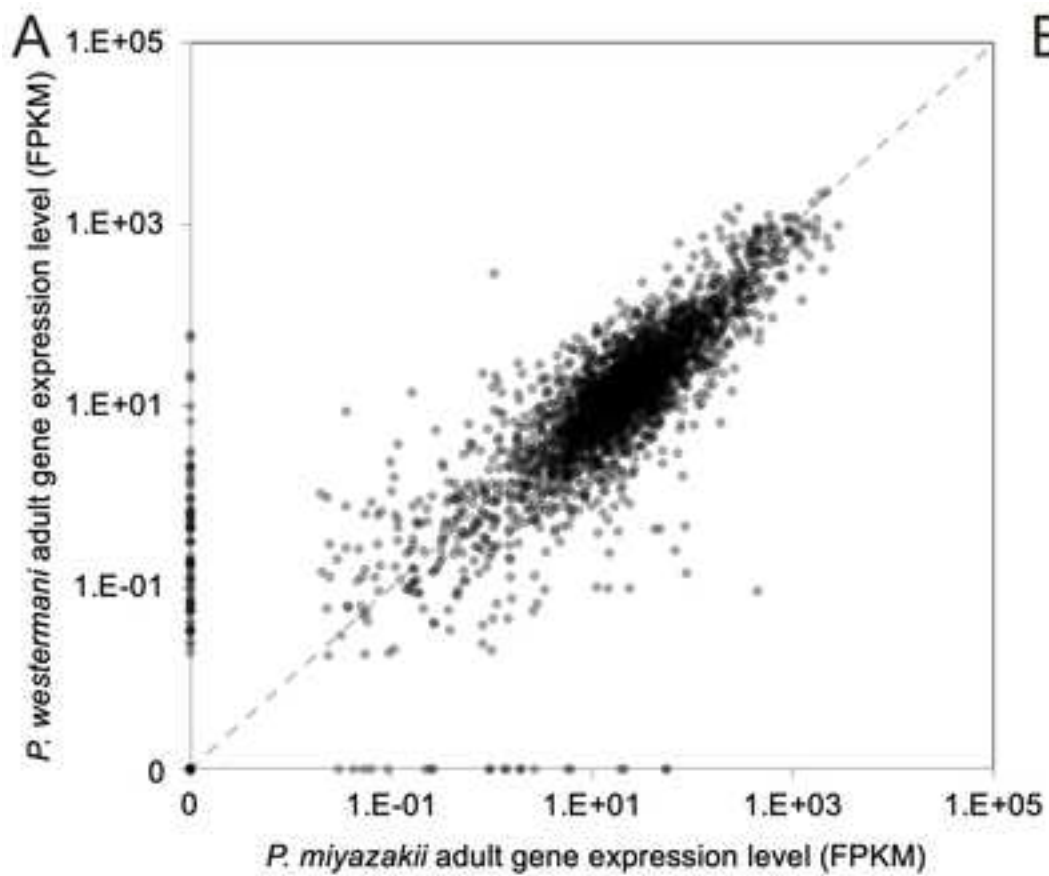**B****Adult stage 1:1 gene correlation**

|                        | <i>P. miyazakii</i> | <i>P. heterotremus</i> | <i>P. kellicotti</i> | <i>P. westermani</i> |
|------------------------|---------------------|------------------------|----------------------|----------------------|
| <i>P. miyazakii</i>    |                     |                        |                      |                      |
| <i>P. heterotremus</i> | 0.76                |                        |                      |                      |
| <i>P. kellicotti</i>   | 0.72                | 0.75                   |                      |                      |
| <i>P. westermani</i>   | 0.79                | 0.85                   | 0.76                 |                      |

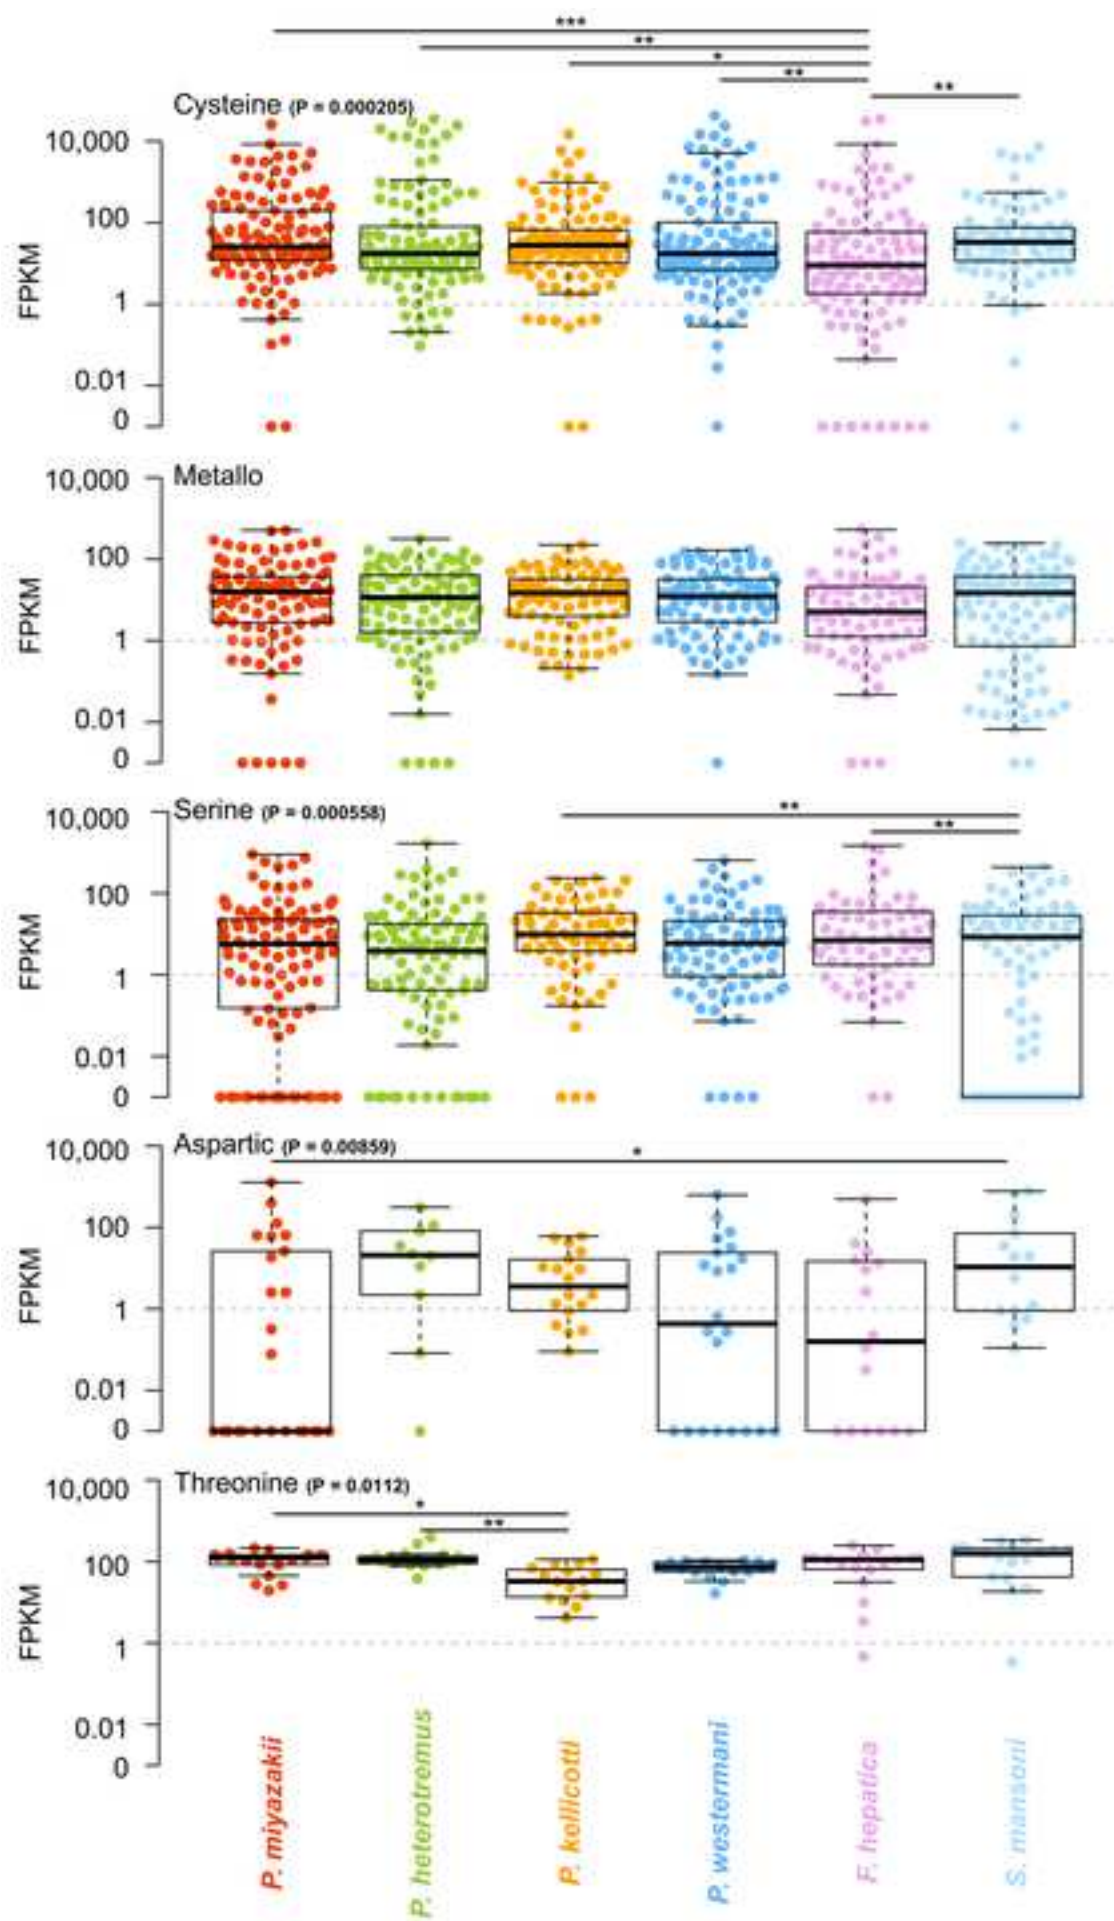





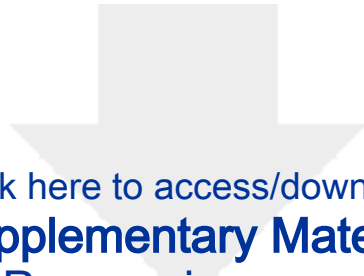

[Click here to access/download](#)

**Supplementary Material**

Supp Table S1 - Paragonimus expression data.xlsx

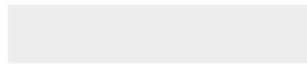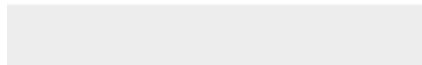

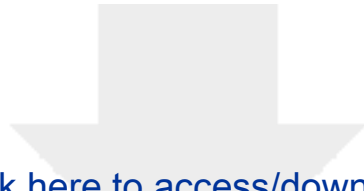

[Click here to access/download](#)

**Supplementary Material**

Supp Table S2 - Genome-wide selection scan\_MM.xlsx





Click here to access/download  
**Supplementary Material**  
Supp Table S3 - OGs and FPKM.xlsx

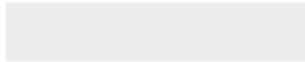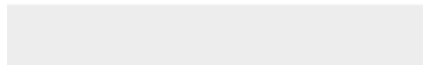



Click here to access/download  
**Supplementary Material**  
Supplementary Text S1.docx



Supplement: giaa073_giga-d-19-00411_revision_3.pdf [file giaa073_giga-d-19-00411_revision_3.pdf]
