# Supplementary material for: Comparative genomics and transcriptomics of 4 Paragonimus species provide insights into lung fluke parasitism and pathogenesis
Source: PubMed Central journal article supplement (PMC7370270; doi:10.1093/gigascience/giaa073), 2020-07-20
Supplement: giaa073_giga-d-19-00411_original_submission.pdf [file giaa073_giga-d-19-00411_original_submission.pdf]

# GigaScience

## Comparative genomics and transcriptomics of four *Paragonimus* species provide insights into lung fluke parasitism and pathogenesis

--Manuscript Draft--

|                                                      |                                                                                                                                                                                                                                                                                                                                                                                                                                                                                                                                                                                                                                                                                                                                                                                                                                                                                                                                                                                                                                                                                                                                                                                                                                                                                                                                                                                                                                                                                                                                                                                                                                                                                                                                                                                                                                                                                                                                                                                                                                                                                                   |                       |
|------------------------------------------------------|---------------------------------------------------------------------------------------------------------------------------------------------------------------------------------------------------------------------------------------------------------------------------------------------------------------------------------------------------------------------------------------------------------------------------------------------------------------------------------------------------------------------------------------------------------------------------------------------------------------------------------------------------------------------------------------------------------------------------------------------------------------------------------------------------------------------------------------------------------------------------------------------------------------------------------------------------------------------------------------------------------------------------------------------------------------------------------------------------------------------------------------------------------------------------------------------------------------------------------------------------------------------------------------------------------------------------------------------------------------------------------------------------------------------------------------------------------------------------------------------------------------------------------------------------------------------------------------------------------------------------------------------------------------------------------------------------------------------------------------------------------------------------------------------------------------------------------------------------------------------------------------------------------------------------------------------------------------------------------------------------------------------------------------------------------------------------------------------------|-----------------------|
| <b>Manuscript Number:</b>                            | GIGA-D-19-00411                                                                                                                                                                                                                                                                                                                                                                                                                                                                                                                                                                                                                                                                                                                                                                                                                                                                                                                                                                                                                                                                                                                                                                                                                                                                                                                                                                                                                                                                                                                                                                                                                                                                                                                                                                                                                                                                                                                                                                                                                                                                                   |                       |
| <b>Full Title:</b>                                   | Comparative genomics and transcriptomics of four <i>Paragonimus</i> species provide insights into lung fluke parasitism and pathogenesis                                                                                                                                                                                                                                                                                                                                                                                                                                                                                                                                                                                                                                                                                                                                                                                                                                                                                                                                                                                                                                                                                                                                                                                                                                                                                                                                                                                                                                                                                                                                                                                                                                                                                                                                                                                                                                                                                                                                                          |                       |
| <b>Article Type:</b>                                 | Research                                                                                                                                                                                                                                                                                                                                                                                                                                                                                                                                                                                                                                                                                                                                                                                                                                                                                                                                                                                                                                                                                                                                                                                                                                                                                                                                                                                                                                                                                                                                                                                                                                                                                                                                                                                                                                                                                                                                                                                                                                                                                          |                       |
| <b>Funding Information:</b>                          | National Institutes of Health - National Institute of Allergy and Infectious Diseases (AI081803)                                                                                                                                                                                                                                                                                                                                                                                                                                                                                                                                                                                                                                                                                                                                                                                                                                                                                                                                                                                                                                                                                                                                                                                                                                                                                                                                                                                                                                                                                                                                                                                                                                                                                                                                                                                                                                                                                                                                                                                                  | Dr. Makedonka Mitreva |
|                                                      | National Institutes of Health - National Human Genome Research Institute (U54HG003079)                                                                                                                                                                                                                                                                                                                                                                                                                                                                                                                                                                                                                                                                                                                                                                                                                                                                                                                                                                                                                                                                                                                                                                                                                                                                                                                                                                                                                                                                                                                                                                                                                                                                                                                                                                                                                                                                                                                                                                                                            | Dr. Makedonka Mitreva |
|                                                      | National Institutes of Health - National Institute of General Medical Sciences (GM097435)                                                                                                                                                                                                                                                                                                                                                                                                                                                                                                                                                                                                                                                                                                                                                                                                                                                                                                                                                                                                                                                                                                                                                                                                                                                                                                                                                                                                                                                                                                                                                                                                                                                                                                                                                                                                                                                                                                                                                                                                         | Dr. Makedonka Mitreva |
|                                                      | Thailand Research Fund (TH) - Distinguished Research Professor Grant (DPG6280002)                                                                                                                                                                                                                                                                                                                                                                                                                                                                                                                                                                                                                                                                                                                                                                                                                                                                                                                                                                                                                                                                                                                                                                                                                                                                                                                                                                                                                                                                                                                                                                                                                                                                                                                                                                                                                                                                                                                                                                                                                 | Dr. Wanchai Maleewong |
| <b>Abstract:</b>                                     | <p><b>Background</b><br/> <i>Paragonimus</i> spp. (lung flukes) are among the most injurious food-borne helminths, infecting ~23 million people, (~293 million with infection risk). Paragonimiasis is acquired from infected undercooked crustaceans and primarily affects the lungs, but often causes lesions elsewhere including the brain. The disease is easily mistaken for tuberculosis due to similar pulmonary symptoms, so diagnostics are in demand.</p> <p><b>Results</b><br/>           We assembled, annotated and compared draft genomes of four prevalent and distinct <i>Paragonimus</i> species: <i>P. miyazakii</i>, <i>P. westermani</i>, <i>P. kellicotti</i> and <i>P. heterotremus</i>. Genomes ranged from 697 to 923 Mb, included 12,072 to 12,853 genes, and were 87% to 96% complete. Orthologous group (OG) analysis spanning 21 species (lung, liver and blood flukes, additional platyhelminths and hosts) provided insights into lung fluke biology, including identifying 256 lung fluke-specific and conserved OGs enriched for iron acquisition, immune modulation and other parasitic functions, and eight "host mimic" OGs including a STOX1 ortholog (proliferation of pulmonary artery cells). Transcriptome analysis identified consistent adult-stage <i>Paragonimus</i> expression profiles, and 388 genes differentially expressed between host body cavities and tissues, enriched for functions including proteolysis, nutrient transport and iron acquisition. Previously identified <i>Paragonimus</i> diagnostic antigens were matched to genes, providing an opportunity to optimize and ensure consistent cross-reactivity for diagnostic assays.</p> <p><b>Conclusions</b><br/>           We anticipate that these novel genomic and transcriptomic resources will be invaluable for future lung fluke research. This report represents a major contribution to ongoing trematode genome sequencing efforts and bootstraps future studies into the biology, evolution and pathogenesis of <i>Paragonimus</i> and related food-borne flukes.</p> |                       |
| <b>Corresponding Author:</b>                         | Makedonka Mitreva<br><br>UNITED STATES                                                                                                                                                                                                                                                                                                                                                                                                                                                                                                                                                                                                                                                                                                                                                                                                                                                                                                                                                                                                                                                                                                                                                                                                                                                                                                                                                                                                                                                                                                                                                                                                                                                                                                                                                                                                                                                                                                                                                                                                                                                            |                       |
| <b>Corresponding Author Secondary Information:</b>   |                                                                                                                                                                                                                                                                                                                                                                                                                                                                                                                                                                                                                                                                                                                                                                                                                                                                                                                                                                                                                                                                                                                                                                                                                                                                                                                                                                                                                                                                                                                                                                                                                                                                                                                                                                                                                                                                                                                                                                                                                                                                                                   |                       |
| <b>Corresponding Author's Institution:</b>           |                                                                                                                                                                                                                                                                                                                                                                                                                                                                                                                                                                                                                                                                                                                                                                                                                                                                                                                                                                                                                                                                                                                                                                                                                                                                                                                                                                                                                                                                                                                                                                                                                                                                                                                                                                                                                                                                                                                                                                                                                                                                                                   |                       |
| <b>Corresponding Author's Secondary Institution:</b> |                                                                                                                                                                                                                                                                                                                                                                                                                                                                                                                                                                                                                                                                                                                                                                                                                                                                                                                                                                                                                                                                                                                                                                                                                                                                                                                                                                                                                                                                                                                                                                                                                                                                                                                                                                                                                                                                                                                                                                                                                                                                                                   |                       |
| <b>First Author:</b>                                 | Bruce A Rosa                                                                                                                                                                                                                                                                                                                                                                                                                                                                                                                                                                                                                                                                                                                                                                                                                                                                                                                                                                                                                                                                                                                                                                                                                                                                                                                                                                                                                                                                                                                                                                                                                                                                                                                                                                                                                                                                                                                                                                                                                                                                                      |                       |
| <b>First Author Secondary Information:</b>           |                                                                                                                                                                                                                                                                                                                                                                                                                                                                                                                                                                                                                                                                                                                                                                                                                                                                                                                                                                                                                                                                                                                                                                                                                                                                                                                                                                                                                                                                                                                                                                                                                                                                                                                                                                                                                                                                                                                                                                                                                                                                                                   |                       |

|                                                                                                                                                                                                                                                                                                                                                                                                                              |                    |
|------------------------------------------------------------------------------------------------------------------------------------------------------------------------------------------------------------------------------------------------------------------------------------------------------------------------------------------------------------------------------------------------------------------------------|--------------------|
| <b>Order of Authors:</b>                                                                                                                                                                                                                                                                                                                                                                                                     | Bruce A Rosa       |
|                                                                                                                                                                                                                                                                                                                                                                                                                              | Young-Jun Choi     |
|                                                                                                                                                                                                                                                                                                                                                                                                                              | Samantha N McNulty |
|                                                                                                                                                                                                                                                                                                                                                                                                                              | Hyeim Jung         |
|                                                                                                                                                                                                                                                                                                                                                                                                                              | John Martin        |
|                                                                                                                                                                                                                                                                                                                                                                                                                              | Takeshi Agatsuma   |
|                                                                                                                                                                                                                                                                                                                                                                                                                              | Hironu Sugiyama    |
|                                                                                                                                                                                                                                                                                                                                                                                                                              | Thanh Le Hoa       |
|                                                                                                                                                                                                                                                                                                                                                                                                                              | Pham Ngoc Doanh    |
|                                                                                                                                                                                                                                                                                                                                                                                                                              | Wanchai Maleewong  |
|                                                                                                                                                                                                                                                                                                                                                                                                                              | David Blair        |
|                                                                                                                                                                                                                                                                                                                                                                                                                              | Paul J. Brindley   |
|                                                                                                                                                                                                                                                                                                                                                                                                                              | Peter U. Fischer   |
|                                                                                                                                                                                                                                                                                                                                                                                                                              | Makedonka Mitreva  |
| <b>Order of Authors Secondary Information:</b>                                                                                                                                                                                                                                                                                                                                                                               |                    |
| <b>Additional Information:</b>                                                                                                                                                                                                                                                                                                                                                                                               |                    |
| <b>Question</b>                                                                                                                                                                                                                                                                                                                                                                                                              | <b>Response</b>    |
| Are you submitting this manuscript to a special series or article collection?                                                                                                                                                                                                                                                                                                                                                | No                 |
| <b>Experimental design and statistics</b><br><br>Full details of the experimental design and statistical methods used should be given in the Methods section, as detailed in our <a href="#">Minimum Standards Reporting Checklist</a> . Information essential to interpreting the data presented should be made available in the figure legends.<br><br>Have you included all the information requested in your manuscript? | Yes                |
| <b>Resources</b><br><br>A description of all resources used, including antibodies, cell lines, animals and software tools, with enough information to allow them to be uniquely identified, should be included in the Methods section. Authors are strongly encouraged to cite <a href="#">Research Resource Identifiers</a> (RRIDs) for antibodies, model organisms and tools, where possible.                              | Yes                |

|                                                                                                                                                                                                                                                                                                                                                                                                                                                                                                                                                         |            |
|---------------------------------------------------------------------------------------------------------------------------------------------------------------------------------------------------------------------------------------------------------------------------------------------------------------------------------------------------------------------------------------------------------------------------------------------------------------------------------------------------------------------------------------------------------|------------|
| <p>Have you included the information requested as detailed in our <a href="#">Minimum Standards Reporting Checklist</a>?</p>                                                                                                                                                                                                                                                                                                                                                                                                                            |            |
| <p><b>Availability of data and materials</b></p> <p>All datasets and code on which the conclusions of the paper rely must be either included in your submission or deposited in <a href="#">publicly available repositories</a> (where available and ethically appropriate), referencing such data using a unique identifier in the references and in the “Availability of Data and Materials” section of your manuscript.</p> <p>Have you have met the above requirement as detailed in our <a href="#">Minimum Standards Reporting Checklist</a>?</p> | <p>Yes</p> |

1 **Comparative genomics and transcriptomics of four *Paragonimus* species provide insights into lung**  
2 **fluke parasitism and pathogenesis**

3 Bruce A. Rosa<sup>1</sup>, Young-Jun Choi<sup>2</sup>, Samantha N. McNulty<sup>2</sup>, Hyeim Jung<sup>2</sup>, John Martin<sup>2</sup>, Takeshi Agatsuma<sup>3</sup>,  
4 Hiromu Sugiyama<sup>4</sup>, Thanh Le Hoa<sup>5</sup>, Pham Ngoc Doanh<sup>6,7</sup>, Wanchai Maleewong<sup>8</sup>, David Blair<sup>9</sup>, Paul J. Brindley<sup>10</sup>,  
5 Peter U. Fischer<sup>1</sup>, Makedonka Mitreva<sup>1,2\*</sup>

6 <sup>1</sup>Department of Internal Medicine, Washington University School of Medicine, St. Louis, MO 63110, USA

7 <sup>2</sup>The McDonnell Genome Institute at Washington University, School of Medicine, St. Louis, MO 63108, USA

8 <sup>3</sup>Department of Environmental Health Sciences, Kochi Medical School, Oko, Nankoku City, Kochi 783-8505,  
9 Japan

10 <sup>4</sup>Laboratory of Helminthology, Department of Parasitology, National Institute of Infectious Diseases, Tokyo 162-  
11 8640, Japan

12 <sup>5</sup>Department of Immunology, Institute of Biotechnology, Vietnam Academy of Science and Technology, Hanoi,  
13 Vietnam

14 <sup>6</sup>Institute of Ecology and Biological Resources, Vietnam Academy of Science and Technology, Hanoi, Vietnam

15 <sup>7</sup>Graduate University of Science and Technology, Vietnam Academy of Science and Technology, Hanoi, Vietnam

16 <sup>8</sup>Research and Diagnostic Center for Emerging Infectious Diseases, Khon Kaen University, Khon Kaen,  
17 Thailand, Department of Parasitology, Faculty of Medicine, Khon Kaen University, Khon Kaen, Thailand

18 <sup>9</sup>College of Marine and Environmental Sciences, James Cook University, Townsville, Queensland 4811,  
19 Australia

20 <sup>10</sup>Departments of Microbiology, Immunology and Tropical Medicine, and Research Center for Neglected  
21 Diseases of Poverty, and Pathology School of Medicine & Health Sciences, George Washington University,  
22 Washington, DC 20037, USA

23

24 \* Correspondence should be addressed to Makedonka Mitreva. Tel. +1-314-285-2005,

25 Fax +1-314-286-1800, Email: [mmitreva@wustl.edu](mailto:mmitreva@wustl.edu)

26

27

28 **Emails:**

29 Bruce A. Rosa: [barosa@wustl.edu](mailto:barosa@wustl.edu)

30 Young-Jun Choi: [choi.y@wustl.edu](mailto:choi.y@wustl.edu)

31 Samantha N. McNulty: [samantha.n.mcnulty@gmail.com](mailto:samantha.n.mcnulty@gmail.com)

32 Hyeim Jung: [jungh@wustl.edu](mailto:jungh@wustl.edu)

33 John Martin: [jmartin@wustl.edu](mailto:jmartin@wustl.edu)

34 Takeshi Agatsuma: [agatsuma@kochi-u.ac.jp](mailto:agatsuma@kochi-u.ac.jp)

35 Hiromu Sugiyama: [hsugi@niid.go.jp](mailto:hsugi@niid.go.jp)

36 Thanh Le Hoa: [imibtvn@gmail.com](mailto:imibtvn@gmail.com)

37 Pham Ngoc Doanh: [pndoanh@yahoo.com](mailto:pndoanh@yahoo.com)

38 Wanchai Maleewong: [wanch\\_ma@kku.ac.th](mailto:wanch_ma@kku.ac.th)

39 David Blair: [david.blair@jcu.edu.au](mailto:david.blair@jcu.edu.au)

40 Paul J. Brindley: [pbrindley@gwu.edu](mailto:pbrindley@gwu.edu)

41 Peter U. Fischer: [pufischer@wustl.edu](mailto:pufischer@wustl.edu)

42 Makedonka Mitreva: [mmitreva@wustl.edu](mailto:mmitreva@wustl.edu)

43

44 **Keywords**

45 Lung flukes, genomics, transcriptomics, paragonimiasis, infectious disease, trematodes

46

47

48

49

50

51

52

53

54

55

56 **Abstract**

57 Background

58 *Paragonimus* spp. (lung flukes) are among the most injurious food-borne helminths, infecting ~23 million people,  
59 (~293 million with infection risk). Paragonimiasis is acquired from infected undercooked crustaceans and  
60 primarily affects the lungs, but often causes lesions elsewhere including the brain. The disease is easily mistaken  
61 for tuberculosis due to similar pulmonary symptoms, so diagnostics are in demand.

62 Results

63 We assembled, annotated and compared draft genomes of four prevalent and distinct *Paragonimus* species: *P.*  
64 *miyazakii*, *P. westermani*, *P. kellicotti* and *P. heterotremus*. Genomes ranged from 697 to 923 Mb, included  
65 12,072 to 12,853 genes, and were 87% to 96% complete. Orthologous group (OG) analysis spanning 21 species  
66 (lung, liver and blood flukes, additional platyhelminths and hosts) provided insights into lung fluke biology,  
67 including identifying 256 lung fluke-specific and conserved OGs enriched for iron acquisition, immune modulation  
68 and other parasitic functions, and eight “host mimic” OGs including a STOX1 ortholog (proliferation of pulmonary  
69 artery cells). Transcriptome analysis identified consistent adult-stage *Paragonimus* expression profiles, and 388  
70 genes differentially expressed between host body cavities and tissues, enriched for functions including  
71 proteolysis, nutrient transport and iron acquisition. Previously identified *Paragonimus* diagnostic antigens were  
72 matched to genes, providing an opportunity to optimize and ensure consistent cross-reactivity for diagnostic assays.

73 Conclusions

74 We anticipate that these novel genomic and transcriptomic resources will be invaluable for future lung fluke research.  
75 This report represents a major contribution to ongoing trematode genome sequencing efforts and bootstraps  
76 future studies into the biology, evolution and pathogenesis of *Paragonimus* and related food-borne flukes.

77

78

79

80

81

## 82 **Background**

83 The trematode genus *Paragonimus*, the lung flukes, is among the most injurious taxon of food-borne  
84 helminths. About 23 million people are infected with lung flukes [1], an estimated 292 million people are at-risk,  
85 mainly in eastern Asia [2] , and billions of people live in areas where *Paragonimus* infections of animals are endemic.  
86 The life-cycle of *Paragonimus* species involves freshwater snails, crustacean intermediate hosts and mammals in  
87 Asia, parts of West Africa, and the Americas [3]. Human paragonimiasis is acquired by consuming raw or  
88 undercooked shrimp and crabs containing the metacercaria, which is the infective stage. Although primarily  
89 affecting the lungs, lesions can occur at other sites, including the brain [4], and pulmonary paragonimiasis is  
90 frequently mistaken for tuberculosis due to similar respiratory symptoms [4].

91 Pathogenesis ensues because of the migration of the newly invading juveniles from the gut to the lungs  
92 and through not-infrequent ectopic migration to the brain, reproductive organs, and subcutaneous sites at the  
93 extremities, and because of toxins and other mediators released by the parasites during the larval migration [4,  
94 5]. The presence of the flukes in the lung causes hemorrhage, inflammation with leukocytic infiltration and  
95 necrosis of lung parenchyma that gradually proceeds to the development of fibrotic encapsulation except for a  
96 fistula from the evolving lesion to the respiratory tract. Eggs of the lung fluke exit the encapsulated lesion through  
97 the fistula to reach the sputum and/or feces of the host, where they pass to the external environment,  
98 accomplishing transmission of the parasite [6]. There are signs and symptoms that allow characterization of  
99 acute and chronic stages of paragonimiasis. In pulmonary paragonimiasis, for example, the most noticeable  
100 clinical symptom of an infected individual is a chronic cough with gelatinous, rusty brown, pneumonia-like, blood-  
101 streaked sputum [6]. Heavy work commonly induces hemoptysis. Pneumothorax, empyema from secondary  
102 bacterial infection and pleural effusion might also be presented. When symptoms include only a chronic cough,  
103 the disease may be misinterpreted as chronic bronchitis and bronchiectasis or bronchial asthma. Pulmonary  
104 paragonimiasis is frequently confused with pulmonary tuberculosis [7]. The symptoms of extra-pulmonary  
105 paragonimiasis vary depending on the location of the fluke, including cerebral [5] and abdominal paragonimiasis  
106 [6].

107 *Paragonimus* is a large genus that includes more than 50 nominal species [8]. Seven of these species or  
108 species complexes of *Paragonimus* are known to infect humans [3]. This is also an ancient genus, thought to have  
109 originated before the breakup of Gondwana [9], but possibly also distributing as colonists from the original East

Asian clade, based on the distribution of host species [10]. To improve our understanding of pathogens across this genus at the molecular level, we have assembled, annotated and compared draft genomes of four of these, three from Asia (*P. westermani* from Japan, *P. heterotremus*, *P. miyazakii*) and one from North America (*P. kellicotti*). Among them, *P. westermani* is the best-known species causing pulmonary paragonimiasis. This name has been applied to a genetically and geographically diverse complex of lung fluke populations differing widely in biological features including infectivity to humans [11]. The complex extends from India and Sri Lanka eastwards to Siberia, Korea and Japan, and southwards into Vietnam, Indonesia and the Philippines. However, human infections are reported primarily from China, Korea, Japan and the Philippines. Until this study, an Indian member of the *P. westermani* complex was the only lung fluke species for which a genome sequence was available [12]. *Paragonimus heterotremus* is the most common cause of pulmonary paragonimiasis in southern China, Lao PDR, Vietnam, northeastern India and Thailand [6, 8]. *Paragonimus miyazakii* is a member of the *P. skrjabini* complex, to which Blair and co-workers accorded sub-specific status [13]. Flukes of this complex tend not to mature in humans but frequently cause ectopic disease at diverse sites, including the brain. In North America, infection with *P. kellicotti* is primarily a disease of native, crayfish-eating mammals including the otter and mink. The occasional human infections can be severe, and thoracic involvement is typical [14, 15].

These four species represent a broad sampling of the phylogenetic diversity of the genus. Most of the known diversity, as revealed by DNA sequences from portions of the mitochondrial genome and the nuclear ribosomal genes, resides in Asia [16]. Analysis of the ITS2 marker by Blair et al [16] indicates that each of the species sequenced occupies a distinct clade within the phylogenetic tree.

In addition to a greater understanding of the genome contents of this group of food-borne trematodes, the findings presented here provide new information to assist development of diagnostic tools and recognition of potential drug targets. The findings will facilitate evolutionary, zoogeographical and phylogenetic investigation of the genus *Paragonimus* and its host-parasite relationships through the comparative analysis of gene content relative to other sequenced platyhelminth and host species, as well as through a comparative transcriptomic analysis.



## 138 **Data Description**

### 139 Genome assemblies and annotations

140 DNA and RNA samples were collected from adult-stage parasites of four distinct *Paragonimus* species:  
141 *P. miyazakii* (Japan), *P. heterotremus* (LC strain, Vietnam), *P. kellicotti* (Missouri, USA) and *Paragonimus*  
142 *westermani* (Japan). Illumina DNA sequencing produced fragments, 3kb- and 8kb-insert whole-genome shotgun  
143 libraries, as well as PacBio reads being generated for *P. kellicotti*, which were used to produce genomic  
144 assemblies using assemblers [17, 18] and scaffolders [19]. Transcriptome datasets utilizing RNA-Seq from the  
145 adult stages of each species were mapped and assembled using Stringtie [20], and included: *P. miyazakii*  
146 samples collected from stages in the liver, peritoneal cavity (2 replicates), lung (adult) and pleural cavity; *P.*  
147 *heterotremus* samples from adults and young adults (2 replicates), and previously published adult-stage  
148 transcriptomic samples for *P. westermani* [21] and *P. kellicotti* [22]. These transcript assemblies, in addition to  
149 available trematode protein sequence information [23, 24] were used as evidence to perform genome annotation  
150 using BRAKER [25] and MAKER [26], after masking for repetitive elements [27], transposable elements [26]  
151 ribosomal RNA and tRNA [28, 29]. Gene models were refined using transcript and protein evidence, including  
152 selection based on Annotation Edit Distance (AED) [30], InterProScan functional annotations [31], and by  
153 balancing sensitivity and specificity [26, 32]. Gene products were named using PANNZER2 [33] and sma3s v2  
154 [34]. Genome assemblies, annotations and raw reads are available for download from the NCBI Sequence Read  
155 Archive (SRA [35]), with accession numbers provided in **Supplementary Table S1**.

### 157 Transcriptome datasets and gene functional annotations

158 RNA-seq datasets were trimmed for adapters [36] and aligned [37] to their respective genome  
159 assemblies, and gene expression levels (FPKM) were quantified per gene per sample in each of the four species  
160 [38]. For *P. miyazakii*, differential gene expression analysis [39] identified genes significantly differentially  
161 expressed between the cavity and tissue samples. Interpro domains and Gene Ontology (GO) terms [31], KEGG  
162 enzymes [40], and protease [41] annotations of the genes were used to identify putative functions of genes of  
163 interest and perform pathway enrichment [42]. All raw RNA-Seq fastq files were uploaded to the NCBI Sequence  
164 Read Archive (SRA [35]), and complete sample metadata and accession information are provided in  
165 **Supplementary Table S1. Supplementary Table S2** provides, for each of the species, complete gene lists and

166 gene expression levels for each of the RNA-Seq samples. Complete functional annotations for every gene and  
167 the differential gene expression dataset are also provided for *P. miyazakii* in this table.

### 168 Gene family conservation dataset

169 Orthologous groups (OG) of genes from 21 species (including the four new *Paragonimus* gene sets) were  
170 inferred with OrthoFinder v1.1.4 [43] (Worm gene sets retrieved from WormBase ParaSite [24]; Outgroup species  
171 gene sets retrieved from Ensembl [44]). For each orthologous group identified in the analysis, **Supplementary**  
172 **Table S3** provides complete gene lists, counts of genes per species, and average gene expression levels from  
173 each the *Paragonimus* transcriptome datasets described above. As an additional gene-level functional  
174 annotation, OG membership information is provided for each of the *P. miyazakii* genes **in Supplementary Table**  
175 **S2** (for example, identifying if a gene is *Paragonimus*-specific, or conserved across all species).

176 The methods section provides detailed descriptions of the data generation described here, as well as the  
177 downstream analyses providing insights into *Paragonimus* biology. All raw and processed data are available in  
178 the supplementary tables, and represent an invaluable resource for future *Paragonimus* research, providing  
179 previously unavailable genome assemblies, gene identifications, functional annotations and expression levels,  
180 as well as conservation information spanning trematode and host species.

## 181 **Analyses**

### 182 Genome features

183 The sizes of the four novel *Paragonimus* genomes range from 697 to 923 Mb, containing between 12,072  
184 and 12,853 genes. These draft genomes are estimated to be between 87% and 96% complete, with the new *P.*  
185 *westermani* genome produced from a sample collected from Japan being slightly more complete than the  
186 previously-sequenced genome produced from a sample collected from India [12] (96.4% vs 94.1%, respectively;  
187 **Table 1**). Here, statements about *P. westermani* apply to the new Japanese genome, unless otherwise stated.  
188 The total genome lengths of the *Paragonimus* spp. are larger than those of the Schistosomatidae and  
189 Opisthorchiidae, but smaller than those of Fasciolidae. However, the total numbers of protein-coding genes are  
190 comparable (**Figure 1A**). Repetitive sequences occupy between 49% and 54% of the *Paragonimus* genomes.  
191 The repeat landscapes, depicting the relative abundance of repeat classes in the genome, versus the Kimura  
192

194 divergence from the consensus, revealed that *P. kellicotti* in particular has a significant number of copies of  
195 transposable elements (TE) with high similarity to consensus (Kimura substitution level: 0-5), indicating recent  
196 and current TE activity (**Figure 1B**). In a recent study [45], TE activity in the Fasciolidae was found to be low.  
197 TEs are potent sources of mutation that can rapidly create genetic variance, especially following genetic  
198 bottlenecks and environmental changes, providing bursts of allelic and phenotypic diversity upon which selection  
199 can act [46, 47]. Therefore, changes in TE activity, modulated by environmentally induced physiological or  
200 genomic stress, may have a major effect on adaptation of populations and species facing novel habitats and  
201 large environmental perturbations [48].

202 Focusing on the gene content, *P. kellicotti* had the shortest average total gene length among the species,  
203 and the lung flukes overall had similar gene lengths compared to other flukes, while platyhelminth species other  
204 than trematodes had shorter genes overall (**Figure 2A**). The variability in gene lengths observed between  
205 species is explained by differences in both average intron lengths (**Figure 2B**) and the average number of exons  
206 per gene (**Figure 2C**) while the average coding sequence (CDS) lengths of the exons across all the platyhelminth  
207 species were similar to each other (**Figure 2D**). Whereas there was species-to-species variability in gene lengths  
208 and exon counts, consistent patterns among the types of flukes were not apparent.

209 Mitochondrial whole genome-based clustering was performed for the four *Paragonimus* species plus  
210 some additional existing mitochondrial genome assemblies for *P. ohirai* and four for *P. westermani*, including  
211 previously-sequenced mitochondrial genomes of *Paragonimus* (**Figure 3A**). This clustering indicated that our *P.*  
212 *westermani* sample clustered with the existing known *P. westermani* samples from eastern Asia, and that all the  
213 other three newly sequenced species were distinct from *P. ohirai*.

214 We generated a PacBio long-read based mitochondrial assembly for *P. kellicotti*. The fully circularized  
215 complete genome was 17.3 kb in length, including a 3.7 kb non-coding repeat region between *tRNA<sup>Gly</sup>* and *cox3*  
216 (**Supplementary Figure S1**). There are seven copies of long repeats (378 bp) and 9.5 copies of short repeats  
217 (111 bp). The long repeats overlap with 6 copies of *tRNA<sup>Glu</sup>*. This structural organization of repeat sequences  
218 does not resemble those found in *Paragonimus ohirai* [12] and *P. westermani* [12] where the non-coding region  
219 is partitioned by *tRNA<sup>Glu</sup>* into two parts.

220 Clustering of the four new lung fluke genomes, four liver fluke genomes, three blood fluke genomes, five  
221 other platyhelminth species, four host species and a yeast outgroup was performed based on the shared

222 phylogeny among orthologous protein groups (using OrthoFinder [43]). These findings mirrored the mitochondrial  
223 clustering results for the lung fluke species (**Figure 3B**), indicating that *P. westermani* is the earlier-diverging  
224 taxon, as previously suggested based on ribosomal RNA [49]. p

225 Although our *P. westermani* reference genome was assembled using samples collected from Japan  
226 (Amakusa, Kyusyu), we also generated additional sequence data using samples from China (Hunan province).  
227 We compared the genomic sequences of our East Asian *P. westermani* to the recently published *P. westermani*  
228 genome from India (Changlang, Arunachal Pradesh) [12] to estimate the genetic divergence between  
229 geographically diverse samples. The average sequence identity between the genomic samples from Japan and  
230 China was 98.3%. The isolate from India was genetically more distant from the East Asian *P. westermani* with  
231 the average sequence identity of 87.6% and 87.9% for the Japanese vs. Indian and the Chinese vs. Indian  
232 comparisons, respectively. Overall, the average degree of identity between strains was 91.3%.

#### 233 Gene-family dynamics identify expanded functions distinguishing lung fluke species

235 We investigated large-scale differences in gene complements among families of digenetic trematodes  
236 (**Figure 4A**) and modeled gene gain and loss while accounting for the phylogenetic history of species [50]. Gene  
237 families of interest that displayed pronounced differential expansion or contraction (**Figure 4B**) included the  
238 papain-family cysteine proteases, cathepsins L, B and F, dynein heavy chain, spectrin/dystrophin, heat shock  
239 70 kDa protein, major vault protein, and multidrug resistance protein. Total protease counts are shown in **Figure**  
240 **4C**.

241 Lineage-specific expansion was observed in cathepsin F genes in *Paragonimus* spp. *Paragonimus*  
242 *miyazakii* RNA-seq reads showed that nine cathepsin F genes (out of 24 total) were differentially expressed, with  
243 expression levels in (peritoneal and pleural) cavity stage parasites significantly higher than in the tissue (lung  
244 and liver) developmental stages. This suggested that (1) these enzymes are highly expressed during parasite  
245 penetration of the intestinal wall and invasion and migration through the abdominal and thoracic cavities (1- to  
246 7-week-old immature stages), and (2) they might participate in metacercarial excystment, tissue  
247 invasion/migration and immune evasion. The remaining 15 constitutively expressed cathepsin F genes might be  
248 involved in nutrient digestion and remodeling of other physiologically active molecules. Ahn et al. [51] also  
249 reported differential expression of cathepsin F genes during development of *P. westermani*, and showed that

250 most are highly immunogenic. This flagged them as prospective diagnostic targets. The importance of cathepsin  
251 F for *Paragonimus* contrasts with its function in the fasciolids, where cathepsin L genes are expanded and are  
252 thought to play a more critical role in host invasion [45, 52].

253 Differential expansion of cytoskeletal molecules is of interest in the context of tegument physiology [53].  
254 Dynein is a microtubule motor protein, which transports intracellular cargo. Spectrin is an actin-binding protein,  
255 with a key role in maintenance of integrity of the plasma membrane. Dystrophin links microfilaments with  
256 extracellular matrix. The syncytial tegument is a complex structure on the surface of flatworms, is a major  
257 adaptation to parasitism, and plays critical roles in nutrient uptake, immune response modulation and evasion,  
258 and other processes [53].

259 In *Paragonimus* spp., expanded gene families included heat shock proteins, major vault proteins, and  
260 multidrug resistance proteins that play roles in maintaining cellular homeostasis under stress conditions.  
261 Flatworm heat shock proteins (HSPs) play a key role as molecular chaperones in the maintenance of protein  
262 homeostasis. They also are immunogenic and immunomodulatory. HSP is the most abundant family of proteins  
263 in the immature and mature egg of *Schistosoma mansoni*, and in the miracidium [54] and is highly abundant in  
264 the tegument of the adult schistosome [55]. In addition, HSP is abundant in the excretory/secretory products of  
265 the adult *Schistosoma japonicum* blood fluke [56]. HSP stimulates diverse immune cells, eliciting release of pro-  
266 and anti-inflammatory cytokines [57], binds human LDL (the purpose of which is unknown but may be associated  
267 with transport of apoprotein B or in lipid trafficking [58]), and given these properties represents a promising  
268 vaccine and diagnostic candidate [59]. Vaults, ribonucleoprotein complexes, are highly conserved in eukaryotes.  
269 Although their exact function remains unclear, it may be associated with multidrug resistance phenotypes and  
270 with signal transduction. In *S. mansoni*, up-regulation of major vault protein has been observed during the  
271 transition from cercaria to schistosomulum and in praziquantel-resistant adult worms [60]. ATP-binding cassette  
272 transporters (ABC transporters) are essential components of cellular physiological machinery, and some ABC  
273 transporters, including P-glycoproteins, pump toxins and xenobiotics out of the cell. Overexpression of P-  
274 glycoprotein has been reported in a praziquantel-resistant *S. mansoni* [61].

275  
276 Tetraspanin sequence evolution in *P. kellicotti*

277 We searched for genes that evolved under positive selection in the four *Paragonimus* spp. based on  
278 the non-synonymous to synonymous substitution rate ratio ( $d_N/d_S$ ). We conducted the branch-site test of  
279 positive selection to identify adaptive gene variants that became fixed in each species [62] (**Supplementary**  
280 **Table S4**). A tetraspanin from *P. kellicotti* (PKEL\_00573) reached statistical significance after correction for  
281 multiple testing ( $d_N/d_S = 9.9$ , FDR = 0.018). Tetraspanins are small integral proteins bearing four  
282 transmembrane domains which form two extracellular loops [63]. In trematodes, they are major components of  
283 the tegument at the host-parasite interface [64], are highly immunogenic vaccine antigens [65, 66], and may  
284 play a role in immune evasion [67]. In the tetraspanin sequence of *P. kellicotti*, we detected six amino acid  
285 sites under positive selection (**Supplementary Figure S2**). Five of the six sites were predicted to be located  
286 within the extracellular loops believed to interact with the immune system of the host. A similar pattern of  
287 positive selection within regions that code for extracellular loops has been reported in tetraspanin-23 from  
288 African *Schistosoma* species [68].

#### 289 Gene phylogeny analysis identifies functions conserved and specific to fluke groups

290 OrthoFinder [43] was used to determine the conservation of orthologous groups (OGs) containing one or  
291 more orthologs from each of the 21 species indicated in **Figure 3B**. Complete gene counts and lists per species  
292 and per OG are provided in **Supplementary Table S3**. These results were parsed to identify the OGs containing  
293 members among the platyhelminth species, and those that were conserved across all members of each group  
294 (lung, liver, and blood flukes, and other platyhelminth species (**Figure 5A**). This analysis identified 256 OGs that  
295 were conserved among, and exclusive to, the lung flukes (**Figures 5A and 5B**). The lung fluke-conserved and -  
296 specific genes were significantly enriched for several gene ontology (GO) terms (**Table 2**; using *P. miyazakii*  
297 genes to test significance), most of which were related to peptidase activity (including serine proteases which  
298 are involved in host tissue invasion, anticoagulation, and immune evasion [69]), as well as “iron binding” (which  
299 may be related to novel iron acquisition mechanisms from host tissue, which is not well understood in most  
300 metazoan parasites, but has been described in schistosomes [70]).

301 Expansion of unique aspartic proteases (including those predicted to be retropepsins) and other  
302 peptidases in the lung flukes may be associated with digestion of ingested blood, given the key role of this  
303 category of hydrolases and their inhibitors in nutrition and digestion of hemoglobin by schistosomes, and indeed  
304

305 other blood-feeding worms including hookworms [71, 72]. Given that pulmonary hemorrhage and hemoptysis  
306 are cardinal signs of lung fluke infection, it can be anticipated that the lung flukes ingest host blood when localized  
307 at the ulcerous lesion induced in the pulmonary parenchyma by infection. Overall, protease counts across  
308 species were similar (**Figure 4C**) although *P. kellicotti* had substantially fewer protease inhibitors compared to  
309 the other *Paragonimus* species (34 vs 57, 62 and 66), *F. hepatica* (61) and *S. mansoni* (55). Protease inhibitors  
310 in flukes are thought to be important for creating a safe environment for the parasite inside the host by inhibiting  
311 and regulating protease activity and immunomodulation [91], so this may suggest a novel host interaction  
312 strategy by *P. kellicotti*.

313 Analysis of the adult-stage gene expression levels of the various protease classes (**Supplementary**  
314 **Figure S3**) did not identify substantial differences among the *Paragonimus* species, except for a lower  
315 expression of threonine proteases in *P. kellicotti*. During the adult stage, cysteine proteases in all *Paragonimus*  
316 species exhibited significantly higher expression overall compared to *F. hepatica*, but similar expression levels  
317 to *S. mansoni*. A previous study identified immunodominant excretory-secretory cysteine proteases of adult  
318 *Paragonimus westermani* involved in immune evasion [73] and another study identified critical roles for  
319 excretory-secretory cysteine proteases during tissue invasion by newly excysted metacercariae of *P. westermani*  
320 [74]. The rapid diversification and critical host-interaction functions of the proteases highlights their importance,  
321 both in terms of understanding *Paragonimus* biology and in terms of identifying targets for control.

322 Focusing on the more specific functional data provided by InterPro domain analysis, functional  
323 enrichment among the lung, liver and blood fluke conserved-and-exclusive OGs (**Figure 5C**) indicated that each  
324 class of fluke has evolved a distinct set of aspartic peptidases, trematode eggshell synthesis genes and saposin-  
325 like genes (which interact with lipids and are strongly immunogenic during fascioliasis [75]). The lung flukes,  
326 meanwhile, have uniquely expanded sets of serine proteases, as well as other gene functions including FAR1  
327 DNA binding (a class of proteins which are important secreted host-interacting proteins in some parasitic  
328 nematodes [76]), fatty-acid binding, and ferritin-like functions (intracellular proteins involved in iron metabolism,  
329 localized in vitelline follicles and eggs [77]).

330 We also identified OGs that are exclusive only to one or more of the lung flukes and one or more of the  
331 mollusk and mammal host species (**Figure 5D**; full species list in **Figure 3B**). Since these OGs are not found in  
332 any of the other platyhelminth species but are conserved with the host of the lung fluke, these are informative

333 candidates for potential host-interacting proteins that may have evolved uniquely in lung flukes to mimic host  
334 factors specific to their environmental niche. The four “host mimic” proteins conserved among all *Paragonimus*  
335 species and both mammalian and molluskan species (**Table 3**) include orthologs of human STOX1 (which  
336 induces the proliferation of artery smooth-muscle cells [78]), and a glutaredoxin-like protein (C5orf63; a class of  
337 proteins that impair bacterial clearance from the lungs in pneumonia [79]), both of which have functional  
338 relevance to the survival of adult-stage *Paragonimus* in the lungs. Similarly, host-mimic proteins only conserved  
339 among mammalian species include Zip67 (a transcriptional repressor of genes including PPARG, which is  
340 involved in inflammation reduction and is highly expressed in alveolar macrophages [80]) and a PAC domain-  
341 containing protein (may function in oxygen detection [81]), both of which have potential function in survival in the  
342 mammalian lungs. Host-mimic proteins conserved only with the mollusk host species included a Zinc-finger  
343 transcription factor of unknown function, and a protein containing Ankyrin repeats, which have previously been  
344 shown to be involved in host-parasite interactions by intracellular bacteria [82]. Overall, this analysis of broad  
345 and specific orthologous group conservation among platyhelminth species and their hosts identifies gene sets  
346 that have uniquely evolved in lung flukes, primarily for survival in their distinct niche in host tissues including  
347 functions such as iron acquisition, host environment oxygen level detection and immune cell modulation.

#### 348 Gene expression analysis identifies stage-specific lung fluke functions

349 Lung (adult) stage RNA-Seq datasets were collected for each of the four lung fluke species (accessions  
350 in **Supplementary Table S1**), and reads were mapped to each of their respective genomes. Based on the 1:1  
351 gene orthologs (as defined by the previously described OG dataset), the orthologous genes across the lung  
352 flukes had consistent adult-stage gene expression levels, with Pearson correlations ranging from 0.72 to 0.85  
353 (**Figure 6A, 6B**). Worms from additional life cycle stages were collected for *P. miyazakii*, with samples  
354 sequenced from cavities (peritoneal and pleural cavities) and tissues (lung and liver). DESeq2 [39] differential  
355 expression analysis comparing tissue and cavity stages identified 216 genes significantly overexpressed in the  
356 cavities relative to the tissues, and 172 genes significantly overexpressed in the tissues relative to the cavities  
357 (**Figure 6C**). Functional enrichment among these gene sets (**Table 4**) indicates that within the tissues, *P.*  
358 *miyazakii* overexpresses genes related to cytoskeleton and microtubules, lyases and phosphatases, carbon-  
359 oxygen lyase and ribonucleotide binding. Within the cavities, *P. miyazakii* overexpresses genes related to



361 cysteine peptidase activity (critical for larval migration through host tissues [83]), iron ion binding (related to  
362 oxygen scavenging), and sulfotransferase (responsible for anthelmintic resistance in *S. mansoni* [84]).

363 The *P. miyazakii* genes belonging to the lung fluke-conserved and -exclusive OGs (described above) on  
364 average had significantly higher expression levels in the liver stage compared to the pleural cavity and lung  
365 stages, and significantly lower expression in the lung stage compared to all of the other stages. These results  
366 suggest that most of these OGs contain genes that are actively expressed during the transit through the host  
367 mammal, en route to the lungs (**Figure 6D**). However, some were more highly expressed in the lung stage  
368 relative to the other stages (**Table 5**), and these genes had annotated functions including serine and aspartic  
369 peptidases and an MFS transporter gene (transports nutrients and ions between cells and the environment [85]).  
370 Gene expression levels and orthologous group identifiers for each gene in each of the four species are provided  
371 in **Supplementary Table S2**, along with detailed functional annotations for each of the *P. miyazakii* genes.

372 This stage-specific gene expression offers insight into known and novel biological functions of lung flukes  
373 at different developmental stages and within different organs and tissues of the mammalian host, and represents  
374 a sophisticated new resource for study of specific genes of the lung fluke.

### 375 Treatments, vaccine targets and diagnostics

377 The World Health Organization (WHO) currently recommends the use of praziquantel or triclabendazole  
378 (considered a backup) for the treatment of paragonimiasis, both of which are highly effective for curing infections  
379 [86]. However, there are concerns about the development of resistance to these drugs; triclabendazole  
380 resistance of *P. westermani* was reported in a human case from Korea [87]. Furthermore, there is widespread  
381 resistance to triclabendazole in liver flukes in cattle in Australia and South America [88], and praziquantel  
382 resistance is anticipated in the future due to its widespread use as a single treatment for schistosomiasis, a  
383 problematic situation which has encouraged the search for novel drugs [89]. The comparative analysis presented  
384 here identifies valuable protein targets for drug treatments, including *Paragonimus*-specific proteins and  
385 trematode-conserved proteins which do not share orthology to human proteins. These can provide a starting  
386 point for future bioinformatic prioritization and drug testing (**Supplementary Tables S2 and S3**).

387 Vaccination to prevent future infections would offer an attractive alternative to treatment, but vaccine  
388 protection against trematode infection has so far been unsuccessful and is unlikely to be practical for

389 paragonimiasis in the near future [90]. However, the complete genome sequences and comparative analysis of  
390 the gene sets presented here provides a valuable resource for potential future vaccine target development.

391 Pulmonary paragonimiasis is frequently mistaken for tuberculosis or pneumonia, and often patients do  
392 not shed eggs, which leads to false positive diagnoses of other conditions such as malaria or pneumonia [4, 91,  
393 92]. This highlights a pressing need for accurate, rapid and affordable diagnostic approaches for paragonimiasis,  
394 a topic which has been the focus of many previous studies. We performed BLAST sequence similarity searches  
395 of previously identified *Paragonimus* diagnostic antigen targets among the four species (**Supplementary Figure**  
396 **S4**). These included: (i) *P. westermani* and *P. pseudoheterotremus* cysteine proteases identified in two previous  
397 studies [93, 94] (matching to the same protein targets from both studies in *P. heterotremus* and *P. kellicotti*), one  
398 of which had high adult-stage expression levels in all four species [93]; (ii) three different tyrosine kinases (one  
399 of which was identified in two different studies, in *Clonorchis sinensis* and in *P. westermani* [95, 96]), all of which  
400 had relatively low gene expression levels in adult stages; (iii) a previously unannotated *P. heterotremus* ELISA  
401 antigen [97] with low expression across life cycle stages, which we now annotate as a saposin protein (which  
402 we found to rapidly evolve among flukes [**Figure 5C**], and which is strongly immunogenic in fascioliasis [75]);  
403 (iv) eggshell proteins of *P. westermani* [98], for which we now provide full-length sequences. We observed that  
404 this gene was conserved across and specific to the lung flukes, with lower gene expression in the young adult  
405 stage (*P. heterotremus*), but higher expression in the adult stages of all species; (v) among serodiagnostic *P.*  
406 *kellicotti* antigens based on a transcriptome assembly and proteomic evidence [21], we identified the top 10 of  
407 the 25 prioritized transcripts that best matched between the transcript sequence and the newly annotated draft  
408 genome of *P. kellicotti*. Thereafter, the full-length gene sequence in *P. kellicotti* was employed to query the other  
409 species. Several of these were highly expressed in the adult stage of all four species, including one that is fluke  
410 specific (PKEL\_05597). However, not all of these had high sequence conservation across all species, with two  
411 only having weak hits in *P. heterotremus* (PKEL\_00171 and PKEL\_01872).

412 As a result of this newly developed genomic resource for the lung flukes, previously identified diagnostic  
413 targets were identified with full gene sequences across all four species. The complete gene sequences,  
414 conservation information and transcriptomic gene expression data for these target proteins can allow for  
415 optimization of the targets for diagnostic testing that is effective on species spanning the genera

(Supplementary Figure S4). This is noteworthy given the absence of a standardized, commercially-available test for serodiagnosis for human paragonimiasis.

## Discussion

To substantially improve our understanding of the lung flukes at the molecular level, we assembled, annotated and compared draft genomes of four species of *Paragonimus*, three from Asia (*P. miyazakii*, *P. westermani* from Japan, *P. heterotremus*) and one from North America (*P. kellicotti*), thereby providing novel and hopefully valuable genomic resources across these important parasites for the first time. We have utilized these new resources to compare and analyze phylogenies, to identify gene sets and biological functions associated with parasitism in lung flukes, and to provide a valuable resource for future investigation into host-parasite interactions for these poorly-understood agents of neglected tropical disease. Our identification of previously prioritized *Paragonimus* diagnostic markers in each of the four lung fluke species revealed that the same protein targets were identified in multiple studies, and hence the availability of full gene sequences now should enable the optimization of diagnostic assays aiming for reactivity across all species of lung fluke. Overall, we hope that the novel genomic and transcriptomic resources developed here will be invaluable for future research on paragonimiasis, and to underpin sequence information to guide experimental design and generate novel hypotheses.

## Methods

### Parasite specimens

Samples of DNA and RNA of *Paragonimus westermani* were sourced in Japan. *Paragonimus heterotremus* (LC strain, Vietnam) were recovered from a cat experimentally infected with metacercariae from Lai Chau province, northern Vietnam (70% ethanol preserved; whole worm). *P. miyazakii* Metacercariae were recovered from freshwater crabs (*Geothelphusa dehaani*), collected in Shizuoka Prefecture, central Japan [15], and were raised to adulthood in rats. DNA and RNA samples were prepared for each of the (pre-)adult flukes recovered from the lungs and from the pleural and peritoneal cavities of experimentally infected rats. *Paragonimus kellicotti* adult worms for genome sequencing were recovered from the lungs of Mongolian gerbils infected in the laboratory with metacercariae recovered from Missouri crayfish [99].

444  
445  
446  
447  
448  
449  
450  
451  
452  
453  
454  
455  
456  
457  
458  
459  
460  
461  
462  
463  
464  
465  
466  
467  
468  
469  
470  
471

## Genome sequencing, assembly and annotation

The assemblies consist of fragments, 3kb- and 8kb-insert whole-genome shotgun libraries. The sequences were generated on the Illumina platform and assembled using Allpaths\_LG [17]. Scaffolding was improved using an in-house tool called Pygap (gap closure tool), the Pyramid assembler with Illumina paired reads to close gaps and extend contigs, and L\_RNA\_scaffolder [19] which uses transcript alignments to improve contiguity. For *P. kellicotti*, PacBio reads were assembled using PBJelly [18], utilizing the Illumina allpaths assembly as the reference. Nanocorr was used to perform error correction on the PacBio data. The nuclear genomes were annotated using the MAKER pipeline v2.31.8 [26]. Repetitive elements were softmasked with RepeatMasker v4.0.6 using a species-specific repeat library created by RepeatModeler v1.0.8, RepBase repeat libraries [27], and a list of known transposable elements provided by MAKER [26]. RNA-seq reads were aligned to their respective genome assemblies and assembled using StringTie v1.2.4 [20] (*P. westermani* [21] and *P. kellicotti* [22] transcriptomic reads were retrieved from published reports). The resulting alignments and transcript assembly were used by BRAKER [25] and MAKER pipelines, respectively, as extrinsic evidence. In addition, for each species, mRNA and EST sequences were retrieved from NCBI and passed to MAKER as transcript evidence. Protein sequences from UniRef100 [23] (Trematoda-specific, n=205,161) and WormBase ParaSite WBPS7 [24] were provided to MAKER as protein homology evidence. *Ab initio* gene predictions from BRAKER v2 [25] and AUGUSTUS v3.2.2 (trained by BRAKER and run within MAKER) were refined using the transcript and protein evidence. Previously unpredicted exons and UTRs were added, and split models were merged. The best-supported gene models were chosen based on Annotation Edit Distance (AED) [30]. To reduce false positives, gene predictions without supporting evidence were excluded in the final annotation build, with the exception of those encoding Pfam domains, as detected by InterProScan v5.19 [31]. These Pfam encoding domains were rescued in order to improve the annotation accuracy overall by balancing sensitivity and specificity [26, 32]. Gene products were named using PANNZER2 [33] and sma3s v2 [34]. **Supplementary Table S1** provides details of database accessions for the genomes. The completeness of annotated gene sets was assessed using BUSCO v3.0 [100]. Gene Ontology (GO), KEGG and protease annotations were performed using InterProScan v5.19 [31], GhostKOALA [40], and MEROPS [41], respectively. Functional enrichment testing was performed using GOSTATS [42] for GO enrichment and negative binomial distribution tests for InterPro

472 domain enrichment (minimum 3 annotated genes required for significant enrichment). Ribosomal RNA and tRNA  
473 were annotated using RNAmmer v1.2.1 [28] and tRNAscan-SE v1.23 [29], respectively. Genome characteristics  
474 and statistics including CDS, numbers and lengths of genes, exons, introns were defined using the longest  
475 complete mRNA (with start and stop codon) for each gene. Across the four species of *Paragonimus*, complete  
476 mRNAs were found for an average of 86.2% of all annotated genes.

477 Assembly of the mitochondrial genome of *P. kellicotti* was achieved using CANU [101] to align PacBio  
478 long-reads, followed by error-correction using Pilon [102].

#### 480 Repeat analysis

481 RepeatModeler v1.0.8 (with WU-BLAST as its search engine) was used to build, refine and classify  
482 consensus models of putative interspersed repeats for each species. With the resulting repeat libraries, genomic  
483 sequences were screened using RepeatMasker v4.0.6 in “slow search” mode to generate a detailed annotation  
484 of the interspersed and simple repeats. Per-copy distances to consensus were calculated (Kimura 2-parameter  
485 model, excluding CpG sites) and were plotted as repeat landscapes where divergence distribution reflected the  
486 activity of transposable elements (TE) on a relative time scale per genome using the calcDivergenceFromAlign.pl  
487 and createRepeatLandscape.pl scripts included in the RepeatMasker package.

#### 489 Gene family evolution

490 Orthologous groups (OG) of genes of 21 species were inferred with OrthoFinder v1.1.4 [43] using the longest  
491 isoform for each gene (*Paragonimus* genome source information in **Supplementary Table S1**; Worm gene sets  
492 were retrieved from WormBase ParaSite in June 2017 [24]; Outgroup species gene sets were retrieved from  
493 Ensembl in June 2017 [44]). CAFE method [50] was employed to model gene gain and loss while accounting for  
494 the species’ phylogenetic history based on an ultrametric species tree and the number of gene copies found in  
495 each species for each gene family. Birth-death ( $\lambda$ ) parameters were estimated and the statistical significance of  
496 the observed family size differences among taxa were assessed. Results from OrthoFinder [43] were parsed to  
497 identify the OGs of interest based on conservation, including the lung fluke-conserved, liver fluke-conserved and  
498 blood fluke-conserved OGs and gene sets per species. **Supplementary Table S3** provides details of full OG  
499 counts per species and gene membership.

500 We used PosiGene [103] to search genome-wide for genes that evolved under positive selection based  
501 on the non-synonymous to synonymous substitution ratio. TMMOD [104] and Protter [105] were used for  
502 transmembrane helical topology prediction and visualization, respectively. We searched for genes that evolved  
503 under positive selection in the four *Paragonimus* spp. based on the non-synonymous to synonymous substitution  
504 rate ratio ( $d_N/d_S$ ). We conducted the branch-site test of positive selection to identify adaptive gene variants that  
505 became fixed in each species [62].  
506

#### 507 Previously identified *Paragonimus* diagnostic antigen search

508 Nucleotide sequences (or, if unavailable, amino acid sequences) were retrieved from each of the cited  
509 publications (**Supplementary Figure S4**). Diamond blastx (nucleotides; v0.9.9.110) or Diamond blastp (amino  
510 acids; v0.9.9.110) were used to identify the top hit gene in each *Paragonimus* genome annotation (default  
511 settings). The best BLAST E-value was used to identify the top match, followed by top bitscore, length and % ID  
512 in the case of ties. For the top 25 *P. kellycotti* immunodominant antigen transcripts identified in McNulty et al,  
513 2014 [22], matches were identified between the assembled transcript and the annotated gene. For the other 3  
514 species, the BLAST searches are performed against the identified *P. kellycotti* gene, and not the original transcript  
515 sequence.  
516

#### 517 RNAseq-based gene expression profiling

518 After adapter trimming using Trimmomatic v0.36 [36], RNA-seq reads were aligned to their respective  
519 genome assemblies using the STAR aligner [37] (2-pass mode, basic). All raw RNA-Seq fastq files were  
520 uploaded to the NCBI Sequence Read Archive (SRA [35]), and complete sample metadata and accession  
521 information are provided in **Supplementary Table S1**. Read fragments (read pairs or single reads) were  
522 quantified per gene per sample using featureCounts (version 1.5.1) [38]. FPKM (fragments per kilobase of gene  
523 length per million reads mapped) normalization was also performed. For *P. miyazakii*, significantly differentially  
524 expressed genes between the cavity and tissue sample sets were identified using DESeq2 (version 1.4.5) [39]  
525 with default settings, and a minimum *P*-value significance threshold of 0.05 (after False Discovery Rate [FDR  
526 [106]] correction for the number of tests). Pearson correlation-based RNA-Seq sample clustering was performed  
527 in R (using the hclust package, complete linkage).

528  
529  
530  
531  
532  
533  
534  
535  
536  
537  
538  
539  
540  
541  
542  
543  
544  
545  
546  
547  
548  
549  
550  
551  
552  
553  
554  
555

## Statistics

To compare genome statistics and protease expression between species (**Figure 2, Supplementary Figure S3**), ANOVA analysis followed by Tukey's HSD post-hoc testing was performed. Because there was a very large number of values being compared for the genome statistics, which can lead to false positive significance in a *t*-test, a random selection of 100 values from each species was used (excluding the upper and lower 1% of data to exclude outliers). Letter labels above the species indicate statistical groups, i.e., if two species share the same letter then they are not statistically significant from each other.

## **Availability of supporting data and materials**

Genomic raw reads, genome assemblies, genome annotations, and raw transcriptomic (RNA-Seq) fastq files were uploaded and are available for download from the NCBI Sequence Read Archive (SRA [35]), with all accession numbers and relevant metadata provided in **Supplementary Table S1. Supplementary Table S2** provides, for each of the species, complete gene lists and gene expression levels for each of the RNA-Seq samples. Complete functional annotations for every gene and the differential gene expression dataset are also provided for *P. miyazakii* in this table. For each orthologous group identified, **Supplementary Table S3** provides complete gene lists, counts of genes per species, and average gene expression levels from each the *Paragonimus* transcriptome datasets described above. All results of the genome-wide selection scan are provided in **Supplementary Table S4**.

## **Declarations**

### List of Abbreviations

FPKM - Fragments Per Kilobase of gene length per Million reads mapped (gene expression level)

OG - Orthologous Group

TE – Transposable Elements

556 Consent for Publication

557 Not Applicable.

558

559 Competing Interests

560 The authors declare that they have no competing interests.

561

562 Funding

563 Sequencing of the genomes was supported by the 'Sequencing the etiological agents of the Food-Borne  
564 Trematodiasis' project (National Institutes of Health - National Human Genome Research Institute award  
565 number U54HG003079). Comparative genome analysis was funded by grants National Institutes of Health -  
566 National Institute of Allergy and Infectious Diseases AI081803 and National Institutes of Health - National  
567 Institute of General Medical Sciences GM097435 to M.M. Parasite material from Thailand was supported by  
568 Distinguished Research Professor Grant (WM), Thailand Research Fund (Grant no. DPG6280002).

569

570 Author's Contributions

- 571 1. **Conceptualization:** MM PJB.
- 572 2. **Formal analysis:** BAR YJC SNM HJ JM.
- 573 3. **Funding acquisition:** PJB MM.
- 574 4. **Methodology:** PJB PUF DB MM.
- 575 5. **Resources:** MM TA HS TLH PND WM DB PUF.
- 576 6. **Visualization:** BAR YJC.
- 577 7. **Writing – original draft:** BAR YJC MM.
- 578 8. **Writing – review & editing:** DB PJB PUF MM.

579

580 Acknowledgements

581 We gratefully acknowledge assistance provided by Xu Zhang and Kymberlie Pepin with genome assembly and  
582 annotation and by Rahul Tyagi for figure graphics. We thank Kurt Curtis for his help generating *P. kellycotti*  
583 parasite material.

584

585

586



587 **References**

- 588
- 589 1. Furst T, Keiser J and Utzinger J. Global burden of human food-borne trematodiasis: a systematic  
590 review and meta-analysis. *Lancet Infect Dis.* 2012;12 3:210-21. doi:10.1016/S1473-3099(11)70294-8.
- 591 2. Utzinger J, Becker SL, Knopp S, Blum J, Neumayr AL, Keiser J, et al. Neglected tropical diseases:  
592 diagnosis, clinical management, treatment and control. *Swiss Med Wkly.* 2012;142:w13727.  
593 doi:10.4414/smw.2012.13727.
- 594 3. Blair D. Paragonimiasis. *Adv Exp Med Biol.* 2014;766:115-52. doi:10.1007/978-1-4939-0915-5\_5.
- 595 4. Furst T, Sayasone S, Odermatt P, Keiser J and Utzinger J. Manifestation, diagnosis, and management  
596 of foodborne trematodiasis. *BMJ.* 2012;344:e4093. doi:10.1136/bmj.e4093.
- 597 5. Lv S, Zhang Y, Steinmann P, Zhou XN and Utzinger J. Helminth infections of the central nervous  
598 system occurring in Southeast Asia and the Far East. *Adv Parasitol.* 2010;72:351-408. doi:S0065-  
599 308X(10)72012-1 [pii] 10.1016/S0065-308X(10)72012-1.
- 600 6. Sripa B, Kaewkes S, Intapan PM, Maleewong W and Brindley PJ. Food-borne trematodiasis in  
601 Southeast Asia epidemiology, pathology, clinical manifestation and control. *Adv Parasitol.* 2010;72:305-  
602 50. doi:S0065-308X(10)72011-X [pii] 10.1016/S0065-308X(10)72011-X.
- 603 7. Liu Q, Wei F, Liu W, Yang S and Zhang X. Paragonimiasis: an important food-borne zoonosis in China.  
604 *Trends Parasitol.* 2008;24 7:318-23. doi:S1471-4922(08)00137-2 [pii] 10.1016/j.pt.2008.03.014.
- 605 8. Blair D, Xu ZB and Agatsuma T. Paragonimiasis and the genus *Paragonimus*. *Adv Parasitol.*  
606 1999;42:113-222.
- 607 9. Blair D, Davis GM and Wu B. Evolutionary relationships between trematodes and snails emphasizing  
608 schistosomes and paragonimids. *Parasitology.* 2001;123:S229-S43. doi:Doi  
609 10.1017/S003118200100837x.
- 610 10. Attwood SW, Upatham ES, Meng XH, Qiu DC and Southgate VR. The phylogeography of Asian  
611 *Schistosoma* (Trematoda: Schistosomatidae). *Parasitology.* 2002;125 Pt 2:99-112.  
612 doi:10.1017/s0031182002001981.

- 613 11. Doanh NP, Tu AL, Bui TD, Loan TH, Nonaka N, Horii Y, et al. Molecular and morphological variation of  
614 *Paragonimus westermani* in Vietnam with records of new second intermediate crab hosts and a new  
615 locality in a northern province. *Parasitology*. 2016;143 12:1639-46. doi:10.1017/S0031182016001219.
- 616 12. Oey H, Zakrzewski M, Narain K, Devi KR, Agatsuma T, Nawaratna S, et al. Whole-genome sequence  
617 of the oriental lung fluke *Paragonimus westermani*. *Gigascience*. 2019;8 1  
618 doi:10.1093/gigascience/giy146.
- 619 13. Blair D, Chang Z, Chen M, Cui A, Wu B, Agatsuma T, et al. *Paragonimus skrjabini* Chen, 1959  
620 (Digenea: Paragonimidae) and related species in eastern Asia: a combined molecular and  
621 morphological approach to identification and taxonomy. *Syst Parasitol*. 2005;60 1:1-21.  
622 doi:10.1007/s11230-004-1378-5.
- 623 14. Lane MA, Marcos LA, Onen NF, Demertzis LM, Hayes EV, Davila SZ, et al. *Paragonimus kellicotti*  
624 flukes in Missouri, USA. *Emerg Infect Dis*. 2012;18 8:1263-7. doi:10.3201/eid1808.120335.
- 625 15. Fischer PU and Weil GJ. North American paragonimiasis: epidemiology and diagnostic strategies.  
626 *Expert Rev Anti-Infe*. 2015;13 6:779-86. doi:10.1586/14787210.2015.1031745.
- 627 16. Blair D, Nawa Y, Mitreva M and Doanh PN. Gene diversity and genetic variation in lung flukes (genus  
628 *Paragonimus*). *Trans R Soc Trop Med Hyg*. 2016;110 1:6-12. doi:10.1093/trstmh/trv101.
- 629 17. Gnerre S, Maccallum I, Przybylski D, Ribeiro FJ, Burton JN, Walker BJ, et al. High-quality draft  
630 assemblies of mammalian genomes from massively parallel sequence data. *Proc Natl Acad Sci U S A*.  
631 2011;108 4:1513-8. doi:10.1073/pnas.1017351108.
- 632 18. English AC, Richards S, Han Y, Wang M, Vee V, Qu J, et al. Mind the gap: upgrading genomes with  
633 Pacific Biosciences RS long-read sequencing technology. *PLoS One*. 2012;7 11:e47768.  
634 doi:10.1371/journal.pone.0047768.
- 635 19. Xue W, Li JT, Zhu YP, Hou GY, Kong XF, Kuang YY, et al. L\_RNA\_scaffolder: scaffolding genomes  
636 with transcripts. *BMC Genomics*. 2013;14:604. doi:10.1186/1471-2164-14-604.
- 637 20. Pertea M, Pertea GM, Antonescu CM, Chang TC, Mendell JT and Salzberg SL. StringTie enables  
638 improved reconstruction of a transcriptome from RNA-seq reads. *Nat Biotechnol*. 2015;33 3:290-5.  
639 doi:10.1038/nbt.3122.

- 640 21. Li BW, McNulty SN, Rosa BA, Tyagi R, Zeng QR, Gu KZ, et al. Conservation and diversification of the  
641 transcriptomes of adult *Paragonimus westermani* and *P. skrjabini*. *Parasit Vectors*. 2016;9:497.  
642 doi:10.1186/s13071-016-1785-x.
- 643 22. McNulty SN, Fischer PU, Townsend RR, Curtis KC, Weil GJ and Mitreva M. Systems biology studies of  
644 adult *paragonimus* lung flukes facilitate the identification of immunodominant parasite antigens. *PLoS*  
645 *Negl Trop Dis*. 2014;8 10:e3242. doi:10.1371/journal.pntd.0003242.
- 646 23. The UniProt C. UniProt: the universal protein knowledgebase. *Nucleic Acids Res*. 2017;45 D1:D158-  
647 D69. doi:10.1093/nar/gkw1099.
- 648 24. Howe KL, Bolt BJ, Shafie M, Kersey P and Berriman M. WormBase ParaSite - a comprehensive  
649 resource for helminth genomics. *Mol Biochem Parasitol*. 2017;215:2-10.  
650 doi:10.1016/j.molbiopara.2016.11.005.
- 651 25. Hoff KJ, Lange S, Lomsadze A, Borodovsky M and Stanke M. BRAKER1: Unsupervised RNA-Seq-  
652 Based Genome Annotation with GeneMark-ET and AUGUSTUS. *Bioinformatics*. 2016;32 5:767-9.  
653 doi:10.1093/bioinformatics/btv661.
- 654 26. Holt C and Yandell M. MAKER2: an annotation pipeline and genome-database management tool for  
655 second-generation genome projects. *BMC Bioinformatics*. 2011;12:491. doi:10.1186/1471-2105-12-  
656 491.
- 657 27. Bao W, Kojima KK and Kohany O. Repbase Update, a database of repetitive elements in eukaryotic  
658 genomes. *Mob DNA*. 2015;6:11. doi:10.1186/s13100-015-0041-9.
- 659 28. Lagesen K, Hallin P, Rodland EA, Staerfeldt HH, Rognes T and Ussery DW. RNAmmer: consistent and  
660 rapid annotation of ribosomal RNA genes. *Nucleic Acids Res*. 2007;35 9:3100-8.  
661 doi:10.1093/nar/gkm160.
- 662 29. Lowe TM and Eddy SR. tRNAscan-SE: a program for improved detection of transfer RNA genes in  
663 genomic sequence. *Nucleic Acids Res*. 1997;25 5:955-64.
- 664 30. Eilbeck K, Moore B, Holt C and Yandell M. Quantitative measures for the management and comparison  
665 of annotated genomes. *BMC Bioinformatics*. 2009;10:67. doi:10.1186/1471-2105-10-67.
- 666 31. Jones P, Binns D, Chang HY, Fraser M, Li W, McAnulla C, et al. InterProScan 5: genome-scale protein  
667 function classification. *Bioinformatics*. 2014;30 9:1236-40. doi:10.1093/bioinformatics/btu031.

- 668 32. Campbell MS, Law M, Holt C, Stein JC, Moghe GD, Hufnagel DE, et al. MAKER-P: a tool kit for the  
669 rapid creation, management, and quality control of plant genome annotations. *Plant Physiol.* 2014;164  
670 2:513-24. doi:10.1104/pp.113.230144.
- 671 33. Koskinen P, Toronen P, Nokso-Koivisto J and Holm L. PANNZER: high-throughput functional  
672 annotation of uncharacterized proteins in an error-prone environment. *Bioinformatics.* 2015;31 10:1544-  
673 52. doi:10.1093/bioinformatics/btu851.
- 674 34. Casimiro-Soriguer CS, Munoz-Merida A and Perez-Pulido AJ. Sma3s: A universal tool for easy  
675 functional annotation of proteomes and transcriptomes. *Proteomics.* 2017;17 12  
676 doi:10.1002/pmic.201700071.
- 677 35. Leinonen R, Sugawara H, Shumway M and on behalf of the International Nucleotide Sequence  
678 Database C. The Sequence Read Archive. *Nucleic Acids Res.* 2011;39 Database issue:D19-D21.  
679 doi:10.1093/nar/gkq1019.
- 680 36. Bolger AM, Lohse M and Usadel B. Trimmomatic: a flexible trimmer for Illumina sequence data.  
681 *Bioinformatics.* 2014;30 15:2114-20. doi:10.1093/bioinformatics/btu170.
- 682 37. Dobin A, Davis CA, Schlesinger F, Drenkow J, Zaleski C, Jha S, et al. STAR: ultrafast universal RNA-  
683 seq aligner. *Bioinformatics.* 2013;29 1:15-21. doi:10.1093/bioinformatics/bts635.
- 684 38. Liao Y, Smyth GK and Shi W. featureCounts: an efficient general purpose program for assigning  
685 sequence reads to genomic features. *Bioinformatics.* 2014;30 7:923-30.  
686 doi:10.1093/bioinformatics/btt656.
- 687 39. Anders S and Huber W. Differential expression analysis for sequence count data. *Genome Biol.*  
688 2010;11 10:R106. doi:10.1186/gb-2010-11-10-r106.
- 689 40. Kanehisa M, Sato Y and Morishima K. BlastKOALA and GhostKOALA: KEGG Tools for Functional  
690 Characterization of Genome and Metagenome Sequences. *J Mol Biol.* 2016;428 4:726-31.  
691 doi:10.1016/j.jmb.2015.11.006.
- 692 41. Rawlings ND, Barrett AJ and Finn R. Twenty years of the MEROPS database of proteolytic enzymes,  
693 their substrates and inhibitors. *Nucleic Acids Res.* 2016;44 D1:D343-50. doi:10.1093/nar/gkv1118.
- 694 42. Falcon S and Gentleman R. Using GOstats to test gene lists for GO term association. *Bioinformatics.*  
695 2007;23 2:257-8. doi:10.1093/bioinformatics/btl567.

- 696 43. Emms DM and Kelly S. OrthoFinder: solving fundamental biases in whole genome comparisons  
697 dramatically improves orthogroup inference accuracy. *Genome Biol.* 2015;16:157. doi:10.1186/s13059-  
698 015-0721-2.
- 699 44. Zerbino DR, Achuthan P, Akanni W, Amode MR, Barrell D, Bhai J, et al. Ensembl 2018. *Nucleic Acids*  
700 *Res.* 2018;46 D1:D754-D61. doi:10.1093/nar/gkx1098.
- 701 45. Choi Y-JC, Fontenla S, Fischer PU, Le TH, Costábile A, Blair D, et al. Adaptive radiation of the flukes of  
702 the family Fasciolidae inferred from genome-wide comparisons of key species. *Molecular Biology and*  
703 *Evolution.* 2019;In Press.
- 704 46. Stapley J, Santure AW and Dennis SR. Transposable elements as agents of rapid adaptation may  
705 explain the genetic paradox of invasive species. *Mol Ecol.* 2015;24 9:2241-52. doi:10.1111/mec.13089.
- 706 47. Schrader L and Schmitz J. The impact of transposable elements in adaptive evolution. *Mol Ecol.* 2018;  
707 doi:10.1111/mec.14794.
- 708 48. Chenais B, Caruso A, Hiard S and Casse N. The impact of transposable elements on eukaryotic  
709 genomes: from genome size increase to genetic adaptation to stressful environments. *Gene.* 2012;509  
710 1:7-15. doi:10.1016/j.gene.2012.07.042.
- 711 49. Prasad PK, Tandon V, Biswal DK, Goswami LM and Chatterjee A. Phylogenetic reconstruction using  
712 secondary structures and sequence motifs of ITS2 rDNA of *Paragonimus westermani* (Kerbert, 1878)  
713 Braun, 1899 (Digenea: Paragonimidae) and related species. *BMC Genomics.* 2009;10 Suppl 3:S25.  
714 doi:10.1186/1471-2164-10-S3-S25.
- 715 50. Han MV, Thomas GW, Lugo-Martinez J and Hahn MW. Estimating gene gain and loss rates in the  
716 presence of error in genome assembly and annotation using CAFE 3. *Mol Biol Evol.* 2013;30 8:1987-  
717 97. doi:10.1093/molbev/mst100.
- 718 51. Ahn CS, Na BK, Chung DL, Kim JG, Kim JT and Kong Y. Expression characteristics and specific  
719 antibody reactivity of diverse cathepsin F members of *Paragonimus westermani*. *Parasitol Int.* 2015;64  
720 1:37-42. doi:10.1016/j.parint.2014.09.012.
- 721 52. McNulty SN, Tort JF, Rinaldi G, Fischer K, Rosa BA, Smircich P, et al. Genomes of *Fasciola hepatica*  
722 from the Americas Reveal Colonization with *Neorickettsia* Endobacteria Related to the Agents of

- 723 Potomac Horse and Human Sennetsu Fevers. PLoS Genet. 2017;13 1:e1006537.  
724 doi:10.1371/journal.pgen.1006537.
- 725 53. Jones MK, Gobert GN, Zhang L, Sunderland P and McManus DP. The cytoskeleton and motor proteins  
726 of human schistosomes and their roles in surface maintenance and host-parasite interactions.  
727 Bioessays. 2004;26 7:752-65. doi:10.1002/bies.20058.
- 728 54. Mathieson W and Wilson RA. A comparative proteomic study of the undeveloped and developed  
729 Schistosoma mansoni egg and its contents: the miracidium, hatch fluid and secretions. Int J Parasitol.  
730 2010;40 5:617-28. doi:10.1016/j.ijpara.2009.10.014.
- 731 55. Sotillo J, Pearson M, Becker L, Mulvenna J and Loukas A. A quantitative proteomic analysis of the  
732 tegumental proteins from Schistosoma mansoni schistosomula reveals novel potential therapeutic  
733 targets. Int J Parasitol. 2015;45 8:505-16. doi:10.1016/j.ijpara.2015.03.004.
- 734 56. Liu F, Cui SJ, Hu W, Feng Z, Wang ZQ and Han ZG. Excretory/secretory proteome of the adult  
735 developmental stage of human blood fluke, Schistosoma japonicum. Mol Cell Proteomics. 2009;8  
736 6:1236-51. doi:10.1074/mcp.M800538-MCP200.
- 737 57. Kolinski T, Marek-Trzonkowska N, Trzonkowski P and Siebert J. Heat shock proteins (HSPs) in the  
738 homeostasis of regulatory T cells (Tregs). Cent Eur J Immunol. 2016;41 3:317-23.  
739 doi:10.5114/ceji.2016.63133.
- 740 58. Pereira AS, Cavalcanti MG, Zingali RB, Lima-Filho JL and Chaves ME. Isoforms of Hsp70-binding  
741 human LDL in adult Schistosoma mansoni worms. Parasitol Res. 2015;114 3:1145-52.  
742 doi:10.1007/s00436-014-4292-z.
- 743 59. He S, Yang L, Lv Z, Hu W, Cao J, Wei J, et al. Molecular and functional characterization of a mortalin-  
744 like protein from Schistosoma japonicum (SjMLP/hsp70) as a member of the HSP70 family. Parasitol  
745 Res. 2010;107 4:955-66. doi:10.1007/s00436-010-1960-5.
- 746 60. Reis EV, Pereira RV, Gomes M, Jannotti-Passos LK, Baba EH, Coelho PM, et al. Characterisation of  
747 major vault protein during the life cycle of the human parasite Schistosoma mansoni. Parasitol Int.  
748 2014;63 1:120-6. doi:10.1016/j.parint.2013.10.005.
- 749 61. Messerli SM, Kasinathan RS, Morgan W, Spranger S and Greenberg RM. Schistosoma mansoni P-  
750 glycoprotein levels increase in response to praziquantel exposure and correlate with reduced

- 751 praziquantel susceptibility. *Mol Biochem Parasitol.* 2009;167 1:54-9.  
752 doi:10.1016/j.molbiopara.2009.04.007.
- 753 62. Yang Z. PAML 4: phylogenetic analysis by maximum likelihood. *Mol Biol Evol.* 2007;24 8:1586-91.  
754 doi:10.1093/molbev/msm088.
- 755 63. Huang S, Yuan S, Dong M, Su J, Yu C, Shen Y, et al. The phylogenetic analysis of tetraspanins  
756 projects the evolution of cell-cell interactions from unicellular to multicellular organisms. *Genomics.*  
757 2005;86 6:674-84. doi:10.1016/j.ygeno.2005.08.004.
- 758 64. Chaiyadet S, Krueajampa W, Hipkaeo W, Plosan Y, Piratae S, Sotillo J, et al. Suppression of mRNAs  
759 encoding CD63 family tetraspanins from the carcinogenic liver fluke *Opisthorchis viverrini* results in  
760 distinct tegument phenotypes. *Sci Rep.* 2017;7 1:14342. doi:10.1038/s41598-017-13527-5.
- 761 65. Krautz-Peterson G, Debatis M, Tremblay JM, Oliveira SC, Da'dara AA, Skelly PJ, et al. *Schistosoma*  
762 *mansoni* Infection of Mice, Rats and Humans Elicits a Strong Antibody Response to a Limited Number  
763 of Reduction-Sensitive Epitopes on Five Major Tegumental Membrane Proteins. *PLoS Negl Trop Dis.*  
764 2017;11 1:e0005306. doi:10.1371/journal.pntd.0005306.
- 765 66. Tran MH, Pearson MS, Bethony JM, Smyth DJ, Jones MK, Duke M, et al. Tetraspanins on the surface  
766 of *Schistosoma mansoni* are protective antigens against schistosomiasis. *Nat Med.* 2006;12 7:835-40.  
767 doi:10.1038/nm1430.
- 768 67. Wu C, Cai P, Chang Q, Hao L, Peng S, Sun X, et al. Mapping the binding between the tetraspanin  
769 molecule (Sjc23) of *Schistosoma japonicum* and human non-immune IgG. *PLoS One.* 2011;6  
770 4:e19112. doi:10.1371/journal.pone.0019112.
- 771 68. Sealey KL, Kirk RS, Walker AJ, Rollinson D and Lawton SP. Adaptive radiation within the vaccine  
772 target tetraspanin-23 across nine *Schistosoma* species from Africa. *Int J Parasitol.* 2013;43 1:95-103.  
773 doi:10.1016/j.ijpara.2012.11.007.
- 774 69. Yang Y, Wen Y, Cai YN, Vallee I, Boireau P, Liu MY, et al. Serine proteases of parasitic helminths.  
775 *Korean J Parasitol.* 2015;53 1:1-11. doi:10.3347/kjp.2015.53.1.1.
- 776 70. Glanfield A, McManus DP, Anderson GJ and Jones MK. Pumping iron: a potential target for novel  
777 therapeutics against schistosomes. *Trends Parasitol.* 2007;23 12:583-8. doi:10.1016/j.pt.2007.08.018.

- 778 71. Brindley PJ, Kalinna BH, Wong JY, Bogitsh BJ, King LT, Smyth DJ, et al. Proteolysis of human  
779 hemoglobin by schistosome cathepsin D. *Mol Biochem Parasitol.* 2001;112 1:103-12.
- 780 72. Williamson AL, Brindley PJ, Abbenante G, Prociv P, Berry C, Girdwood K, et al. Cleavage of  
781 hemoglobin by hookworm cathepsin D aspartic proteases and its potential contribution to host  
782 specificity. *FASEB J.* 2002;16 11:1458-60. doi:10.1096/fj.02-0181fje.
- 783 73. Lee EG, Na BK, Bae YA, Kim SH, Je EY, Ju JW, et al. Identification of immunodominant excretory-  
784 secretory cysteine proteases of adult *Paragonimus westermani* by proteome analysis. *Proteomics.*  
785 2006;6 4:1290-300. doi:10.1002/pmic.200500399.
- 786 74. Na BK, Kim SH, Lee EG, Kim TS, Bae YA, Kang I, et al. Critical roles for excretory-secretory cysteine  
787 proteases during tissue invasion of *Paragonimus westermani* newly excysted metacercariae. *Cell*  
788 *Microbiol.* 2006;8 6:1034-46. doi:10.1111/j.1462-5822.2006.00685.x.
- 789 75. Caban-Hernandez K and Espino AM. Differential expression and localization of saposin-like protein 2 of  
790 *Fasciola hepatica*. *Acta Trop.* 2013;128 3:591-7. doi:10.1016/j.actatropica.2013.08.012.
- 791 76. Basavaraju SV, Zhan B, Kennedy MW, Liu Y, Hawdon J and Hotez PJ. Ac-FAR-1, a 20 kDa fatty acid-  
792 and retinol-binding protein secreted by adult *Ancylostoma caninum* hookworms: gene transcription  
793 pattern, ligand binding properties and structural characterisation. *Mol Biochem Parasitol.* 2003;126  
794 1:63-71.
- 795 77. Jones MK, McManus DP, Sivadorai P, Glanfield A, Moertel L, Belli SI, et al. Tracking the fate of iron in  
796 early development of human blood flukes. *Int J Biochem Cell Biol.* 2007;39 9:1646-58.  
797 doi:10.1016/j.biocel.2007.04.017.
- 798 78. Xu Y, Sun Z, Wang Q, Wang T, Liu Y and Yu F. Stox1 induced the proliferation and cell cycle arrest in  
799 pulmonary artery smooth muscle cells via AKT signaling pathway. *Vascul Pharmacol.*  
800 2019;120:106568. doi:10.1016/j.vph.2019.106568.
- 801 79. Janssen-Heininger Y. P3 - Glutathione, Glutaredoxin And S-Glutathionylation In Lung Disease. *Free*  
802 *Radical Biology and Medicine.* 2017;112:3. doi:<https://doi.org/10.1016/j.freeradbiomed.2017.10.350>.
- 803 80. Børud B, Mellgren G, Lund J and Bakke M. Cloning and Characterization of a Novel Zinc Finger Protein  
804 that Modulates the Transcriptional Activity of Nuclear Receptors. *Mol Endocrinol.* 2003;17 11:2303-19.  
805 doi:10.1210/me.2003-0158 %J Molecular Endocrinology.



- 806 81. Taylor BL and Zhulin IB. PAS domains: internal sensors of oxygen, redox potential, and light.  
807 Microbiology and molecular biology reviews : MMBR. 1999;63 2:479-506.
- 808 82. Jernigan KK and Bordenstein SR. Ankyrin domains across the Tree of Life. PeerJ. 2014;2:e264.  
809 doi:10.7717/peerj.264.
- 810 83. Grote A, Caffrey CR, Rebello KM, Smith D, Dalton JP and Lustigman S. Cysteine proteases during  
811 larval migration and development of helminths in their final host. PLoS Negl Trop Dis. 2018;12  
812 8:e0005919. doi:10.1371/journal.pntd.0005919.
- 813 84. Taylor AB, Roberts KM, Cao X, Clark NE, Holloway SP, Donati E, et al. Structural and Enzymatic  
814 Insights into Species-specific Resistance to Schistosome Parasite Drug Therapy. 2017;  
815 doi:10.1074/jbc.M116.766527.
- 816 85. Pao SS, Paulsen IT and Saier MH, Jr. Major facilitator superfamily. Microbiol Mol Biol Rev. 1998;62  
817 1:1-34.
- 818 86. World Health Organization. 2019. Accessed August 25, 2019.
- 819 87. Kyung SY, Cho YK, Kim YJ, Park JW, Jeong SH, Lee JI, et al. A paragonimiasis patient with allergic  
820 reaction to praziquantel and resistance to triclabendazole: successful treatment after desensitization to  
821 praziquantel. Korean J Parasitol. 2011;49 1:73-7. doi:10.3347/kjp.2011.49.1.73.
- 822 88. Kelley JM, Elliott TP, Beddoe T, Anderson G, Skuce P and Spithill TW. Current Threat of  
823 Triclabendazole Resistance in Fasciola hepatica. Trends Parasitol. 2016; doi:10.1016/j.pt.2016.03.002.
- 824 89. Mader P, Rennar GA, Ventura AMP, Grevelding CG and Schlitzer M. Chemotherapy for Fighting  
825 Schistosomiasis: Past, Present and Future. ChemMedChem. 2018;13 22:2374-89.  
826 doi:10.1002/cmdc.201800572.
- 827 90. Stutzer C, Richards SA, Ferreira M, Baron S and Maritz-Olivier C. Metazoan Parasite Vaccines:  
828 Present Status and Future Prospects. Front Cell Infect Microbiol. 2018;8:67.  
829 doi:10.3389/fcimb.2018.00067.
- 830 91. Radzikowska E, Chabowski M and Bestry I. Tuberculosis mimicry. Eur Respir J. 2006;27 3:652; author  
831 reply doi:10.1183/09031936.06.00121205.
- 832 92. Eapen S, Espinal E and Firstenberg M. Delayed diagnosis of paragonimiasis in Southeast Asian  
833 immigrants: A need for global awareness. 2018;4 2:173-7. doi:10.4103/ijam.ljam\_2\_18.

- 834 93. Yang SH, Park JO, Lee JH, Jeon BH, Kim WS, Kim SI, et al. Cloning and characterization of a new  
835 cysteine proteinase secreted by *Paragonimus westermani* adult worms. *Am J Trop Med Hyg.* 2004;71  
836 1:87-92.
- 837 94. Yoonuan T, Nuamtanong S, Dekumyoy P, Phuphisut O and Adisakwattana P. Molecular and  
838 immunological characterization of cathepsin L-like cysteine protease of *Paragonimus*  
839 *pseudoheterotremus*. *Parasitol Res.* 2016;115 12:4457-70. doi:10.1007/s00436-016-5232-x.
- 840 95. Kim SH and Bae YA. Lineage-specific expansion and loss of tyrosinase genes across platyhelminths  
841 and their induction profiles in the carcinogenic oriental liver fluke, *Clonorchis sinensis*. *Parasitology.*  
842 2017;144 10:1316-27. doi:10.1017/S003118201700083X.
- 843 96. Bae YA, Kim SH, Ahn CS, Kim JG and Kong Y. Molecular and biochemical characterization of  
844 *Paragonimus westermani* tyrosinase. *Parasitology.* 2015;142 6:807-15.  
845 doi:10.1017/S0031182014001942.
- 846 97. Pothong K, Komalamisra C, Kalambaheti T, Watthanakulpanich D, Yoshino TP and Dekumyoy P.  
847 ELISA based on a recombinant *Paragonimus heterotremus* protein for serodiagnosis of human  
848 paragonimiasis in Thailand. *Parasit Vectors.* 2018;11 1:322. doi:10.1186/s13071-018-2878-5.
- 849 98. Bae YA, Kim SH, Cai GB, Lee EG, Kim TS, Agatsuma T, et al. Differential expression of *Paragonimus*  
850 *westermani* eggshell proteins during the developmental stages. *Int J Parasitol.* 2007;37 3-4:295-305.  
851 doi:10.1016/j.ijpara.2006.10.006.
- 852 99. Fischer PU, Curtis KC, Marcos LA and Weil GJ. Molecular characterization of the North American lung  
853 fluke *Paragonimus kellicotti* in Missouri and its development in Mongolian gerbils. *Am J Trop Med Hyg.*  
854 2011;84 6:1005-11. doi:10.4269/ajtmh.2011.11-0027.
- 855 100. Waterhouse RM, Seppey M, Simao FA, Manni M, Ioannidis P, Klioutchnikov G, et al. BUSCO  
856 applications from quality assessments to gene prediction and phylogenomics. *Mol Biol Evol.* 2017;  
857 doi:10.1093/molbev/msx319.
- 858 101. Koren S, Walenz BP, Berlin K, Miller JR, Bergman NH and Phillippy AM. Canu: scalable and accurate  
859 long-read assembly via adaptive k-mer weighting and repeat separation. *Genome Res.* 2017;27 5:722-  
860 36. doi:10.1101/gr.215087.116.

- 861 102. Walker BJ, Abeel T, Shea T, Priest M, Abouelliel A, Sakthikumar S, et al. Pilon: an integrated tool for  
862 comprehensive microbial variant detection and genome assembly improvement. PLoS One. 2014;9  
863 11:e112963. doi:10.1371/journal.pone.0112963.
- 864 103. Sahm A, Bens M, Platzer M and Szafranski K. PosiGene: automated and easy-to-use pipeline for  
865 genome-wide detection of positively selected genes. Nucleic Acids Res. 2017;45 11:e100.  
866 doi:10.1093/nar/gkx179.
- 867 104. Kahsay RY, Gao G and Liao L. An improved hidden Markov model for transmembrane protein  
868 detection and topology prediction and its applications to complete genomes. Bioinformatics. 2005;21  
869 9:1853-8. doi:10.1093/bioinformatics/bti303.
- 870 105. Omasits U, Ahrens CH, Muller S and Wollscheid B. Protter: interactive protein feature visualization and  
871 integration with experimental proteomic data. Bioinformatics. 2014;30 6:884-6.  
872 doi:10.1093/bioinformatics/btt607.
- 873 106. Benjamini Y and Hochberg Y. Controlling the False Discovery Rate: A Practical and Powerful Approach  
874 to Multiple Testing. Journal of the Royal Statistical Society Series B (Methodological). 1995;57 1:289-  
875 300. doi:10.2307/2346101.
- 876 107. Shield AJ, Murray TP, Cappello JY, Coggan M and Board PG. Polymorphisms in the human glutathione  
877 transferase Kappa (GSTK1) promoter alter gene expression. Genomics. 2010;95 5:299-305.  
878 doi:<https://doi.org/10.1016/j.ygeno.2010.02.007>.
- 879  
880  
881  
882  
883  
884  
885  
886  
887  
888

## Figure Captions

**Figure 1.** Comparisons of the overall content of the assembled *Paragonimus* genome assemblies. Comparisons are based on **(A)** length (including statistics for other sequenced trematode genomes) and **(B)** Repeat landscapes, measured using the Kimura substitution level, which indicates how much a repeat sequence has degenerated since its incorporation into the genome (i.e., how recently the repeat sequence was added). The high peak at the far left of *P. kellicotti* indicates a recent incorporation or active transposable element activity.

**Figure 2:** Comparison of genome annotation characteristics and attributes among several species of flatworms. Attributes characterized included **(A)** Full gene lengths, including coding and noncoding sequences, **(B)** Average intron lengths per gene, **(C)** Number of exons per gene, and **(D)** Coding sequence (CDS) length per exon. *P* values and letter groupings indicating significant differences among species, as calculated using ANOVA with Tukey's HSD post-hoc test.

**Figure 3.** Clustering of *Paragonimus* species. **(A)** Mitochondrial whole genome-based phylogeny, including previously-sequenced *Paragonimus* mitochondrial genomes (with accessions indicated). **(B)** Species clustering based on single-member OPF sequences. 262,720 genes (85% of all genes across the species) were assigned to 17,953 OPFs; 2,493 genes are in 326 species-specific OPFs.

**Figure 4.** Gene-family dynamics among platyhelminth species. **(A)** Rapidly evolving families of interest are quantified at each stage of the phylogeny, including genes gained (blue) and lost (red) relative to other species. The number of rapidly evolving genes are indicated in parentheses. **(B)** Functionally annotated gene families of interest that displayed most pronounced differential expansions or contractions. **(C)** Overall protease and protease inhibitor abundance per species.

**Figure 5.** Orthologous Group (OG) distribution analysis. **(A)** OGs identified among groups of flukes. The OGs conserved in at least one of the species from each group are indicated in black, and the OGs conserved among all the species in the overlapping groups are indicated in red. **(B)** Counts of OGs among the four *Paragonimus*

917 species, with *Paragonimus*-specific gene sets indicated in red text. The 256 *Paragonimus* conserved-and-  
918 specific genes are indicated with highlight (Table 5). **(C)** Significant functional enrichment (Interpro domains)  
919 among the gene sets conserved among, and specific to each major group of flukes (256, 758 and 270 OPFs in  
920 lung, liver and blood flukes, respectively), relative to the functions in the complete gene sets. **(D)** Counts of OGs  
921 only shared between the *Paragonimus* species and one or more of the host mammal and mollusk species, but  
922 not the other platyhelminth species (potential host-interacting OGs). The potential host-interacting OGs  
923 conserved among all four *Paragonimus* species are highlighted.

924  
925 **Figure 6:** Analysis of gene expression data for species of lung flukes of the genus *Paragonimus*. **(A)** Comparison  
926 of adult-stage gene expression levels among 1:1 orthologs shared by *P. westermani* and *P. miyazakii*. Pearson  
927 correlation = 0.79. **(B)** Pearson correlation values between all lung fluke species for the adult-stage expression  
928 levels of all 1:1 orthologous genes. **(C)** Differential gene expression between cavities (blue) and tissues (orange)  
929 in *P. miyazakii*. Clustering based on FPKM value across all genes is indicated in the bottom right (Pearson  
930 clustering, complete linkage). **(D)** A comparison of the average relative expression of the lung fluke-specific and  
931 -conserved genes in each *P. miyazakii* tissue type. \*\* P < 0.01, \*\*\* P < 0.001, according to an ANOVA test of all  
932 Z-score values.

945

946 **Tables**947 **Table 1:** The draft genome of *Paragonimus*: assembly, size and annotation characteristics  
948

| Statistic                | <i>Paragonimus miyazakii</i> | <i>Paragonimus heterotremus</i> | <i>Paragonimus kellicotti</i> | <i>Paragonimus westermani</i> (Japan) | <i>Paragonimus westermani</i> (India) [12] |
|--------------------------|------------------------------|---------------------------------|-------------------------------|---------------------------------------|--------------------------------------------|
| Total genome length (Mb) | 915.8                        | 841.2                           | 696.5                         | 923.3                                 | 922.8                                      |
| Number of contigs        | 22,318                       | 27,557                          | 29,377                        | 22,477                                | 30,455                                     |
| Mean contig size (kb)    | 41                           | 30.5                            | 23.7                          | 41.1                                  | 30.3                                       |
| Median contig size (kb)  | 15.1                         | 9.3                             | 10.2                          | 17.2                                  | 4.8                                        |
| Max. contig size (kb)    | 919.8                        | 715.6                           | 826                           | 829                                   | 809.4                                      |
| N50 length (kb)          | 108.8                        | 92.5                            | 56.0                          | 100.8                                 | 135.2                                      |
| N50 number               | 2,320                        | 2,506                           | 3,316                         | 2,664                                 | 1,943                                      |
| Number of genes          | 12,652                       | 12,490                          | 12,853                        | 12,072                                | 12,771                                     |
| Avg gene length (kb)     | 25.9                         | 22.6                            | 17.6                          | 24.1                                  | 18.0                                       |
| Avg CDS length (kb)      | 1.5                          | 1.4                             | 1.1                           | 1.4                                   | 1.4                                        |
| Avg intron length (kb)   | 4.2                          | 4                               | 3.6                           | 4.2                                   | 4.0                                        |
| Avg # exons per gene     | 6.7                          | 6.2                             | 5.3                           | 6.3                                   | 5.2                                        |
| BUSCO completeness       | 93.4%                        | 93.4%                           | 86.8%                         | 96.4%                                 | 94.1%                                      |
| % annotated InterPro     | 82%                          | 85%                             | 81%                           | 87%                                   | 82%                                        |
| % annotated KEGG         | 40%                          | 41%                             | 34%                           | 43%                                   | 43%                                        |

949

950

951

952

**Table 2.** "Molecular Function" Gene Ontology terms enriched among *P. miyazakii* genes that are conserved among and exclusive to lung flukes.

| GO ID      | GO term name                                        | P value | # Conserved and Specific | Total # in genome |
|------------|-----------------------------------------------------|---------|--------------------------|-------------------|
| GO:0004175 | endopeptidase activity                              | 5.2E-05 | 8                        | 132               |
| GO:0008236 | serine-type peptidase activity                      | 5.6E-05 | 6                        | 67                |
| GO:0017171 | serine hydrolase activity                           | 5.6E-05 | 6                        | 67                |
| GO:0004252 | serine-type endopeptidase activity                  | 1.6E-04 | 5                        | 51                |
| GO:0070011 | peptidase activity, acting on L-amino acid peptides | 6.1E-04 | 9                        | 237               |
| GO:0008233 | peptidase activity                                  | 8.7E-04 | 9                        | 249               |
| GO:0004568 | chitinase activity                                  | 2.1E-03 | 2                        | 7                 |
| GO:0004190 | aspartic-type endopeptidase activity                | 1.1E-02 | 2                        | 16                |
| GO:0070001 | aspartic-type peptidase activity                    | 1.1E-02 | 2                        | 16                |
| GO:0008199 | ferric iron binding                                 | 1.1E-02 | 2                        | 16                |

953

954

955

956  
957**Table 3:** Annotations of “host-mimic” orthologous groups that are conserved among the four *Paragonimus* species and one or more of their host taxa, but no other platyhelminth species.

| Host conservation       | OPF       | Annotated genes in OPF |                                                                                             | Known function                                                                                                                         |
|-------------------------|-----------|------------------------|---------------------------------------------------------------------------------------------|----------------------------------------------------------------------------------------------------------------------------------------|
|                         |           | Species                | Gene                                                                                        |                                                                                                                                        |
| Both mammal and mollusk | OG0008088 | Human                  | STOX1                                                                                       | Induces proliferation of pulmonary artery smooth muscle cells [78]                                                                     |
|                         | OG0007415 | Human                  | C5orf63 (Glutaredoxin-like protein)                                                         | Another Glutaredoxin gene (Grx1) impairs bacterial clearance from the lungs and increases severity of pneumonia [79]                   |
|                         | OG0007990 | Human                  | GSTK1                                                                                       | Associated with insulin secretion and fat deposition [107]                                                                             |
|                         | OG0008725 | Human                  | LRRC58                                                                                      | Leucine rich repeats - No annotated function specific to this protein                                                                  |
| Mammal                  | OG0005049 | Human                  | Zip67                                                                                       | Transcriptional repressor of genes including PPARG - involved in inflammation reduction, highly expressed in alveolar macrophages [80] |
|                         | OG0006588 | Human                  | PAC domain-containing protein                                                               | Voltage-gated potassium channel; Possibly involved in oxygen detection [81]                                                            |
| Mollusk                 | OG0008337 | <i>P. miyazakii</i>    | IPR domain: Zinc finger C2H2-type                                                           | Common transcription factor domain                                                                                                     |
|                         | OG0008914 | <i>P. miyazakii</i>    | KEGG: euchromatic histone-lysine N-methyltransferase (EHMT1)<br>IPR: Ankyrin repeat domains | EHMT1: Histone modification<br>Ankyrin repeat: host-parasite interactions by intracellular bacteria [82]                               |

958

959

960

961

962

963

964

965

966

967

968

969

970

971

972

973  
974  
975**Table 4.** "Molecular Function" Gene Ontology terms enriched among the 216 *P. miyazakii* genes that are overexpressed in cavities (peritoneal, pleural) relative to tissues (lung, liver), and among the 172 overexpressed in tissues relative to cavities.

| Sample group | GO term    | Term                                                        | FDR-corrected P value | Number of genes over-expressed |
|--------------|------------|-------------------------------------------------------------|-----------------------|--------------------------------|
| Cavities     | GO:0008234 | cysteine-type peptidase activity                            | 1.0E-05               | 8                              |
|              | GO:0005509 | calcium ion binding                                         | 1.1E-05               | 13                             |
|              | GO:0008233 | peptidase activity                                          | 3.0E-04               | 11                             |
|              | GO:0046872 | metal ion binding                                           | 6.6E-04               | 17                             |
|              | GO:0043169 | cation binding                                              | 7.6E-04               | 17                             |
|              | GO:0070011 | peptidase activity, acting on L-amino acid peptides         | 8.3E-04               | 10                             |
|              | GO:0008375 | acetylglucosaminyltransferase activity                      | 8.4E-04               | 3                              |
|              | GO:0008194 | UDP-glycosyltransferase activity                            | 1.5E-03               | 3                              |
|              | GO:0008146 | sulfotransferase activity                                   | 2.4E-03               | 2                              |
|              | GO:0016787 | hydrolase activity                                          | 2.4E-03               | 21                             |
|              | GO:0005544 | calcium-dependent phospholipid binding                      | 5.6E-03               | 2                              |
|              | GO:0016782 | transferase activity, transferring sulfur-containing groups | 6.9E-03               | 2                              |
|              | GO:0005506 | iron ion binding                                            | 7.2E-03               | 3                              |
| Tissues      | GO:0005200 | structural constituent of cytoskeleton                      | 1.1E-07               | 8                              |
|              | GO:0016829 | lyase activity                                              | 2.7E-04               | 6                              |
|              | GO:0017111 | nucleoside-triphosphatase activity                          | 5.5E-04               | 14                             |
|              | GO:0016462 | pyrophosphatase activity                                    | 6.9E-04               | 14                             |
|              | GO:0016818 | hydrolase activity, acting on acid anhydrides...            | 7.6E-04               | 14                             |
|              | GO:0004634 | phosphopyruvate hydratase activity                          | 8.2E-04               | 2                              |
|              | GO:0016817 | hydrolase activity, acting on acid anhydrides               | 8.3E-04               | 14                             |
|              | GO:0003924 | GTPase activity                                             | 1.6E-03               | 8                              |
|              | GO:0003824 | catalytic activity                                          | 2.0E-03               | 48                             |
|              | GO:0016836 | hydro-lyase activity                                        | 2.1E-03               | 3                              |
|              | GO:0016835 | carbon-oxygen lyase activity                                | 2.6E-03               | 3                              |
|              | GO:0003777 | microtubule motor activity                                  | 3.1E-03               | 5                              |
|              | GO:0016830 | carbon-carbon lyase activity                                | 3.6E-03               | 3                              |
|              | GO:0016491 | oxidoreductase activity                                     | 3.6E-03               | 10                             |
|              | GO:0003774 | motor activity                                              | 4.6E-03               | 5                              |
|              | GO:0005198 | structural molecule activity                                | 6.6E-03               | 8                              |
|              | GO:0032561 | guanyl ribonucleotide binding                               | 6.8E-03               | 8                              |
|              | GO:0032550 | purine ribonucleoside binding                               | 6.8E-03               | 8                              |
|              | GO:0001883 | purine nucleoside binding                                   | 6.8E-03               | 8                              |
|              | GO:0005525 | GTP binding                                                 | 6.8E-03               | 8                              |
|              | GO:0032549 | ribonucleoside binding                                      | 7.3E-03               | 8                              |
|              | GO:0001882 | nucleoside binding                                          | 7.6E-03               | 8                              |
|              | GO:0019001 | guanyl nucleotide binding                                   | 8.1E-03               | 8                              |
|              | GO:0008017 | microtubule binding                                         | 9.9E-03               | 4                              |

976



977  
978  
979**Table 5:** *Paragonimus*-conserved and specific genes with relatively high expression levels in the *P. miyazakii* lung (adult) stage relative to other stages (minimum 1.5-fold expression difference compared to all other stages).

| Gene       | Gene function (InterPro)                           | Expression level (FPKM) |         |       |       |
|------------|----------------------------------------------------|-------------------------|---------|-------|-------|
|            |                                                    | Peritoneal              | Pleural | Liver | Lung  |
| PMIY_10706 | -                                                  | 0                       | 0       | 0     | 1.00  |
| PMIY_04932 | -                                                  | 0                       | 0       | 0     | 0.50  |
| PMIY_04199 | -                                                  | 0                       | 0       | 0     | 0.23  |
| PMIY_05623 | IPR009003: Peptidase S1, PA clan (Serine protease) | 0                       | 0       | 0     | 0.03  |
| PMIY_05645 | -                                                  | 0.03                    | 0       | 0     | 1.08  |
| PMIY_10421 | -                                                  | 0                       | 0       | 0     | 0.03  |
| PMIY_10154 | -                                                  | 0.03                    | 0.17    | 0.25  | 2.10  |
| PMIY_10315 | -                                                  | 0.30                    | 0.26    | 0     | 1.67  |
| PMIY_07404 | IPR028089: Domain of unknown function DUF4455      | 0.05                    | 0       | 0     | 0.22  |
| PMIY_06071 | IPR035914: Spermadhesin, CUB domain superfamily    | 0.16                    | 0.11    | 0.20  | 0.80  |
| PMIY_09494 | -                                                  | 1.61                    | 1.76    | 0.08  | 5.88  |
| PMIY_01683 | -                                                  | 0.24                    | 0.18    | 0.05  | 0.79  |
| PMIY_12118 | IPR021109: Aspartic peptidase domain superfamily   | 0.02                    | 0       | 0     | 0.04  |
| PMIY_06957 | -                                                  | 0.87                    | 1.68    | 1.65  | 3.55  |
| PMIY_00756 | -                                                  | 14.75                   | 20.66   | 16.12 | 43.07 |
| PMIY_01507 | -                                                  | 0.23                    | 0.38    | 0.39  | 0.79  |
| PMIY_11874 | -                                                  | 0.05                    | 0.05    | 0     | 0.10  |
| PMIY_05793 | -                                                  | 0.03                    | 0.06    | 0.26  | 0.47  |
| PMIY_05272 | -                                                  | 5.44                    | 4.20    | 4.22  | 9.67  |
| PMIY_12189 | IPR036259: MFS transporter superfamily             | 1.84                    | 1.72    | 1.73  | 3.25  |
| PMIY_12491 | -                                                  | 0.63                    | 0       | 0.18  | 1.08  |
| PMIY_08946 | -                                                  | 0                       | 0.06    | 0.00  | 0.10  |
| PMIY_12111 | -                                                  | 1.23                    | 0.35    | 1.04  | 2.04  |
| PMIY_02371 | IPR016024: Armadillo-type fold                     | 10.30                   | 9.68    | 12.40 | 20.06 |
| PMIY_11682 | -                                                  | 4.36                    | 6.64    | 5.66  | 10.58 |
| PMIY_12247 | IPR036236: Zinc finger C2H2 superfamily            | 2.84                    | 3.22    | 4.16  | 6.60  |
| PMIY_06566 | -                                                  | 0.63                    | 1.02    | 1.04  | 1.64  |
| PMIY_02942 | -                                                  | 5.32                    | 5.71    | 8.45  | 13.11 |
| PMIY_11404 | -                                                  | 2.40                    | 2.82    | 2.58  | 4.36  |
| PMIY_07606 | IPR009060: UBA-like superfamily                    | 1.33                    | 0.12    | 0.49  | 2.03  |

980

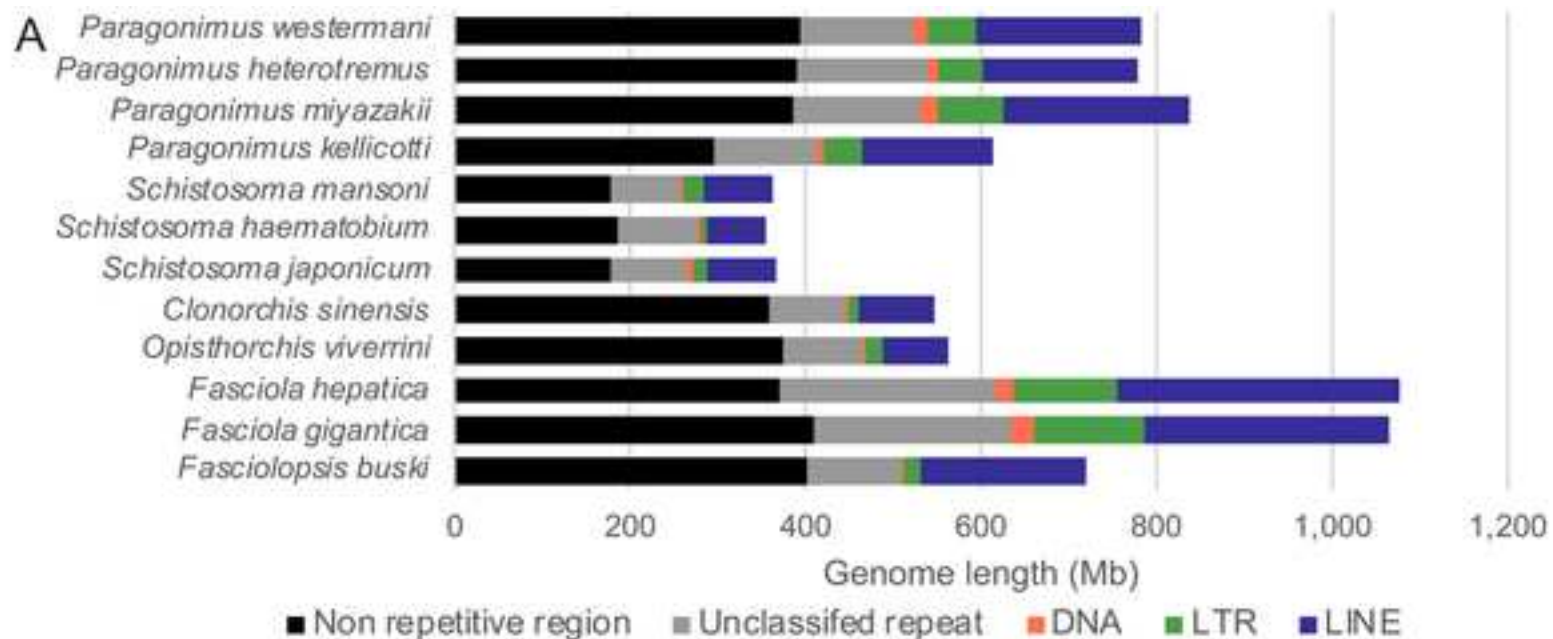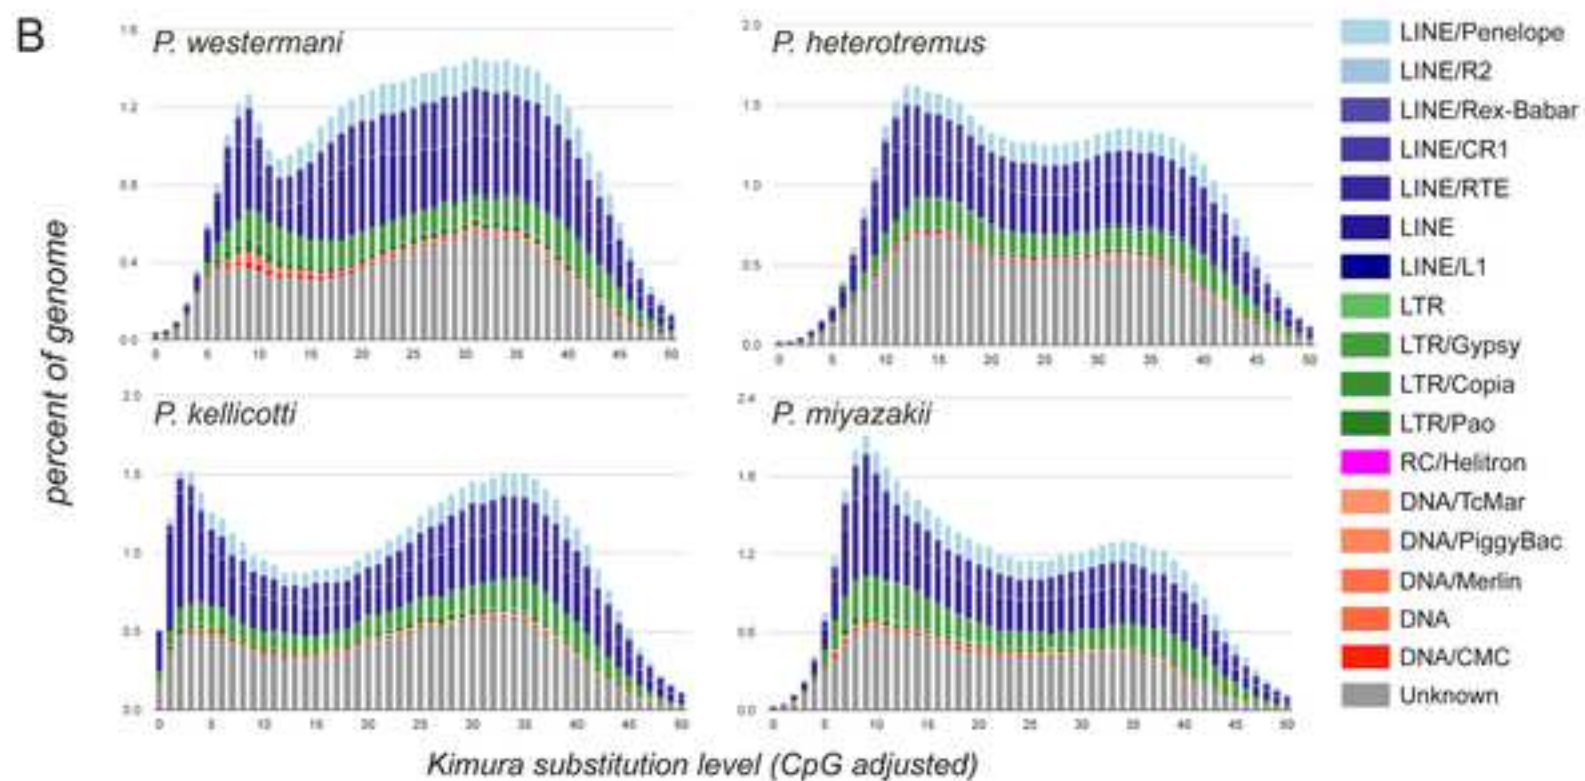

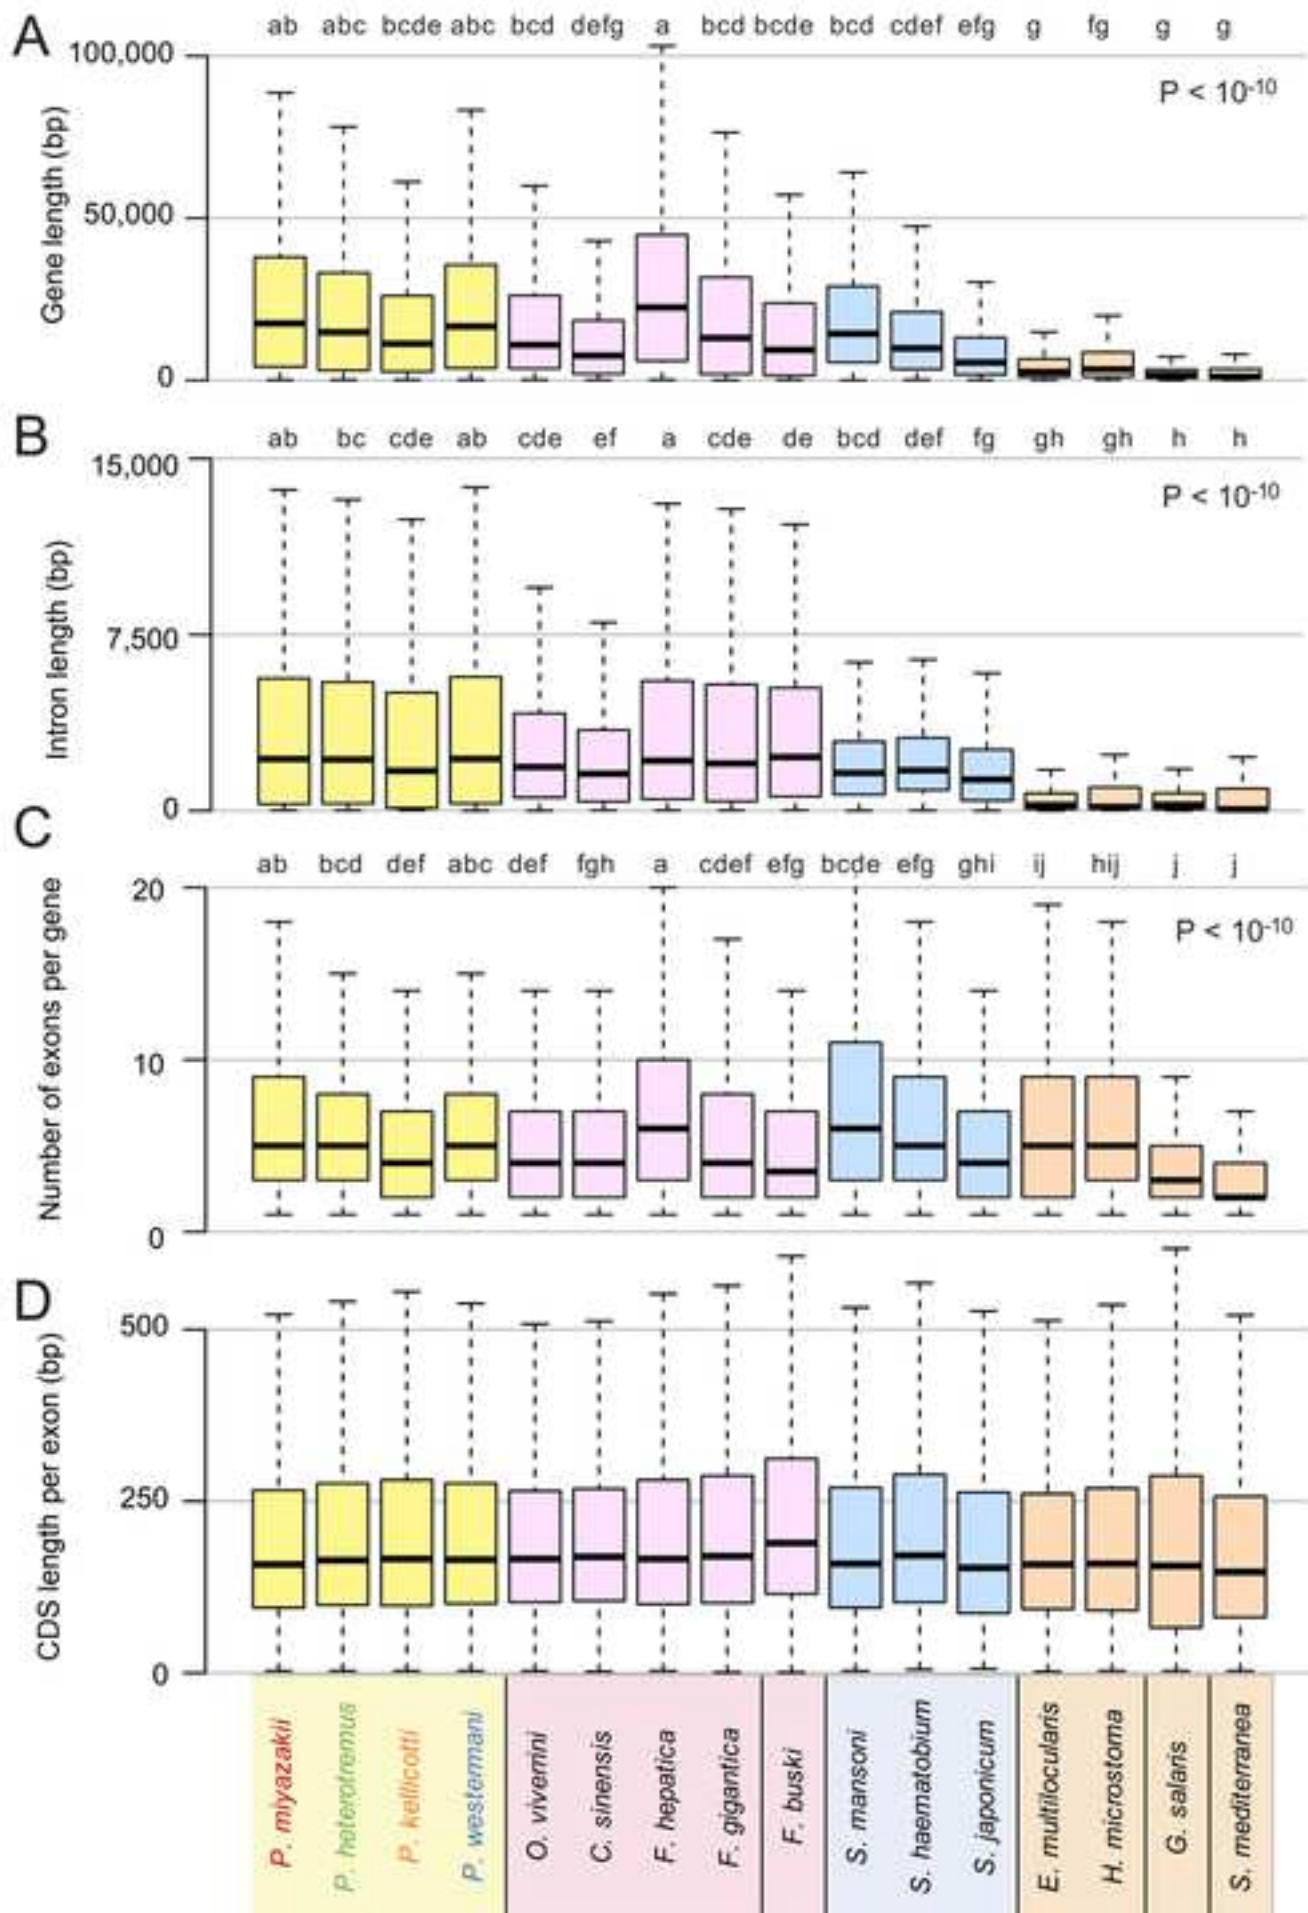

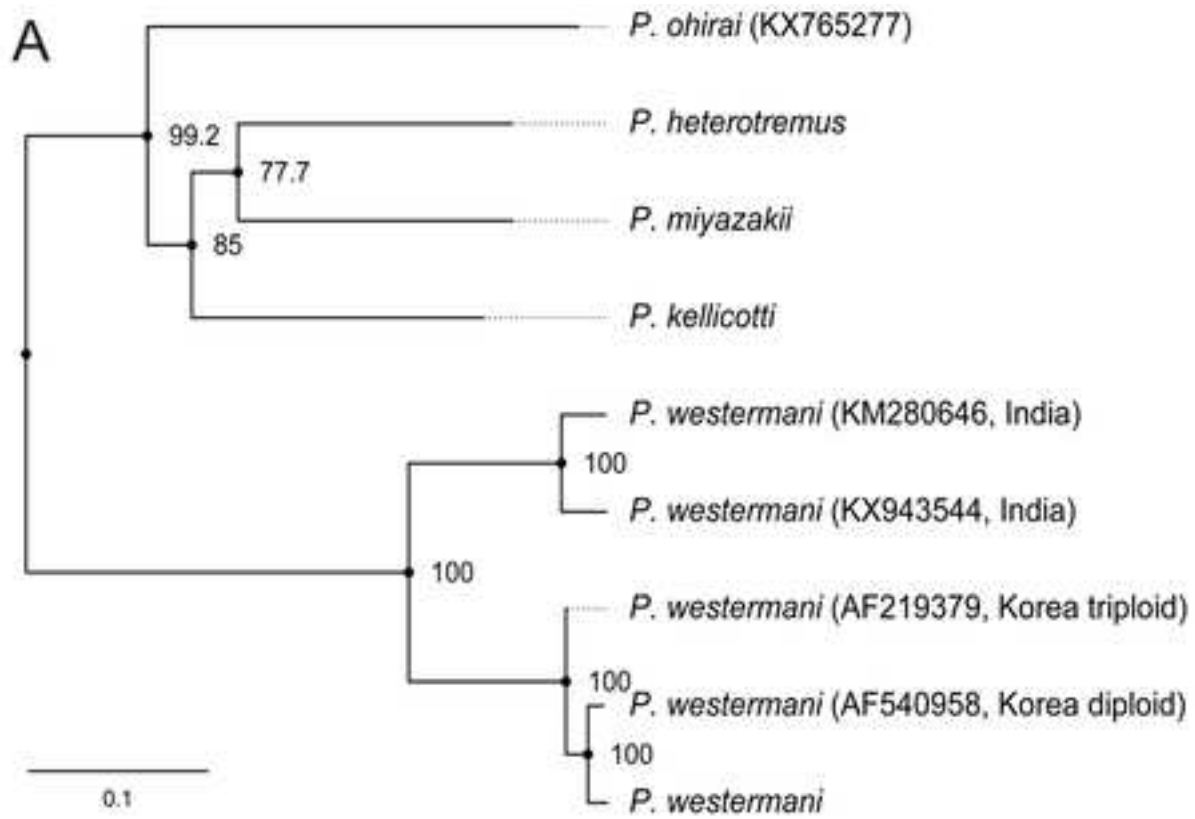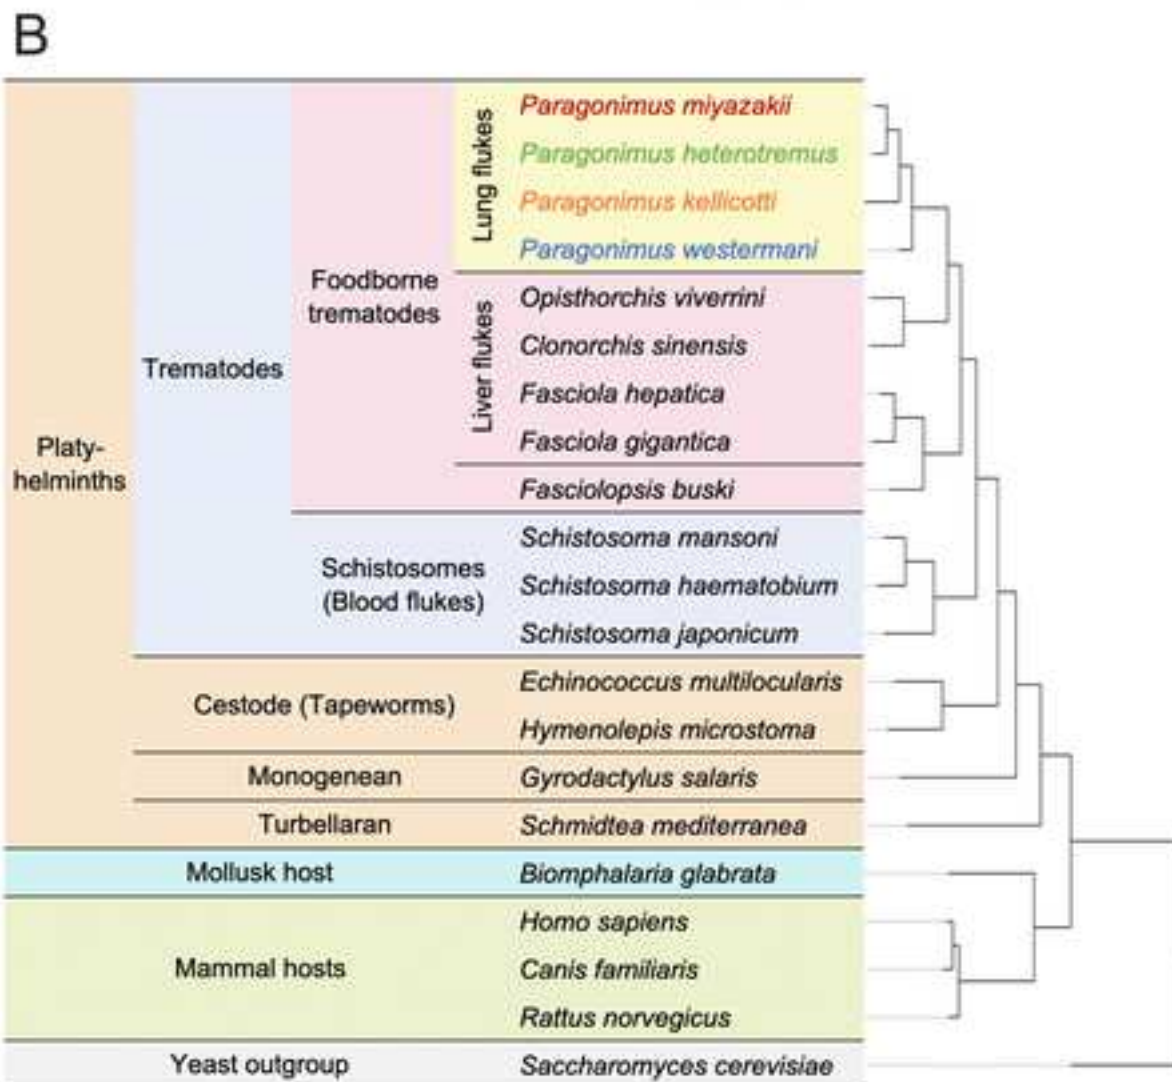



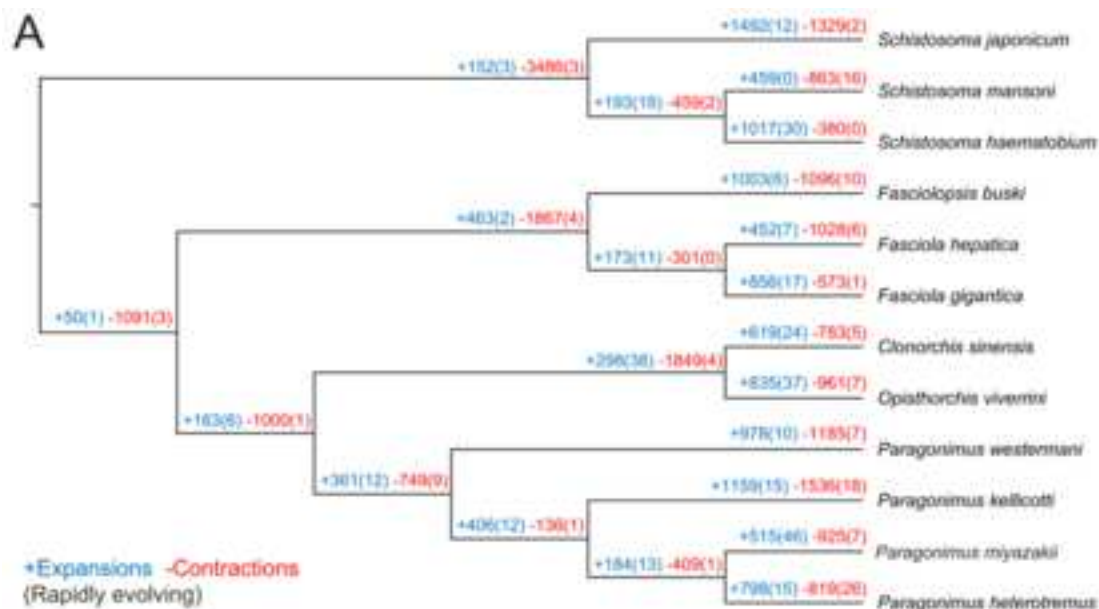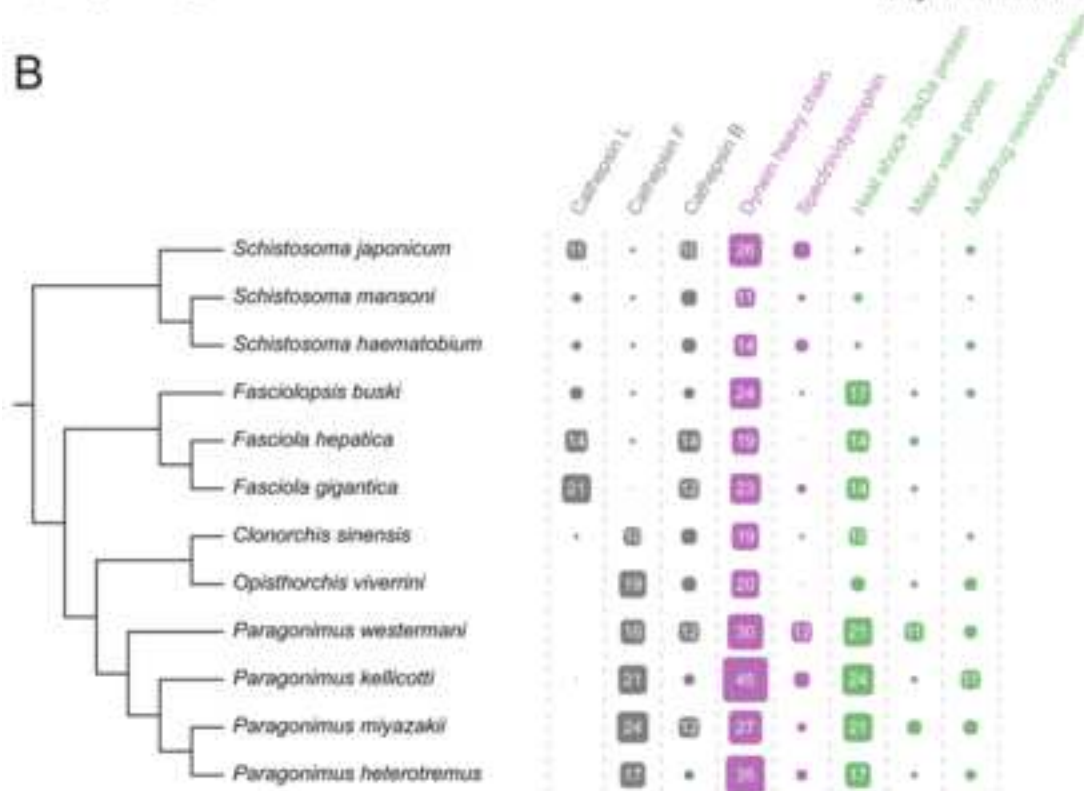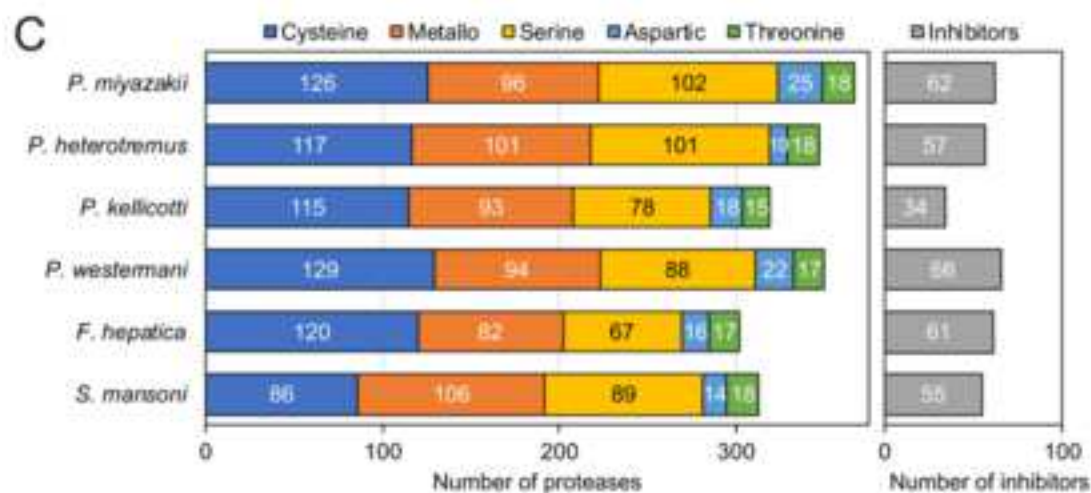



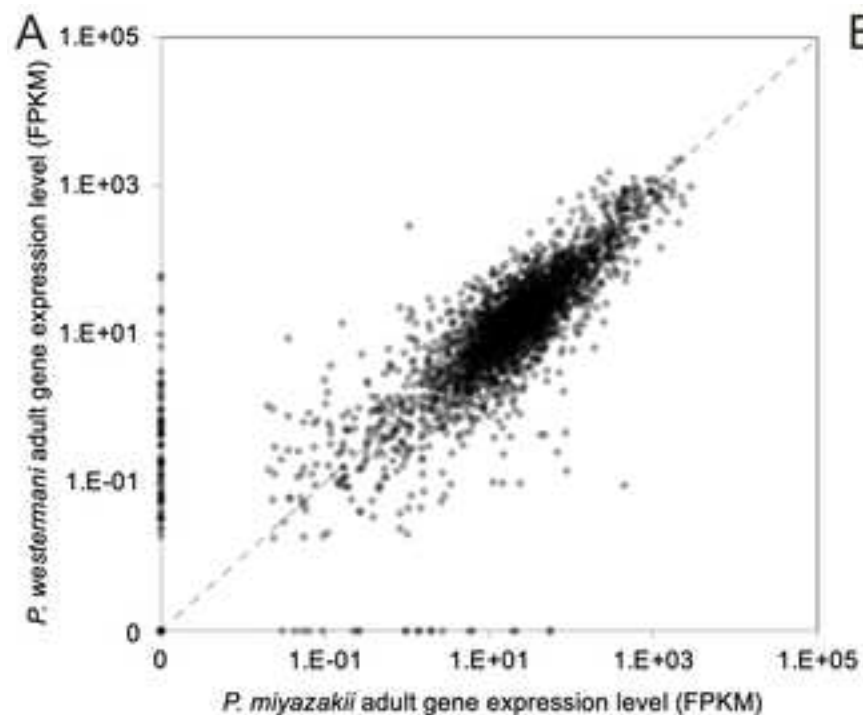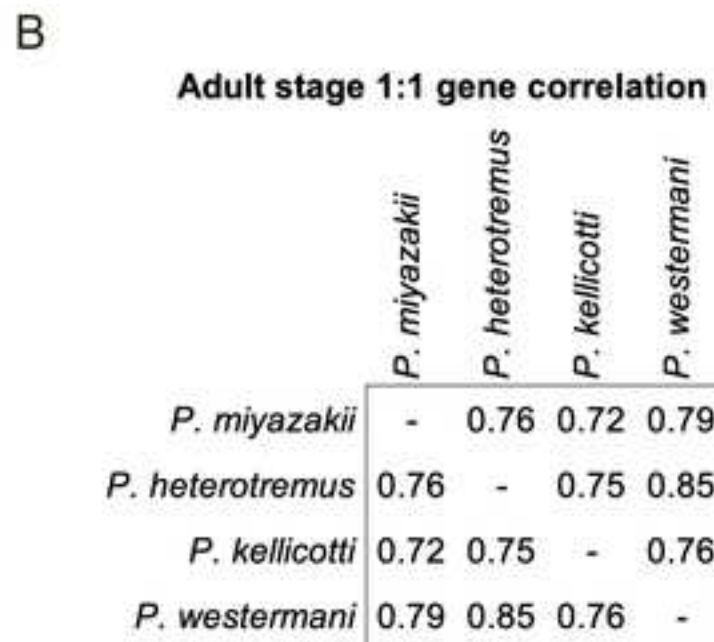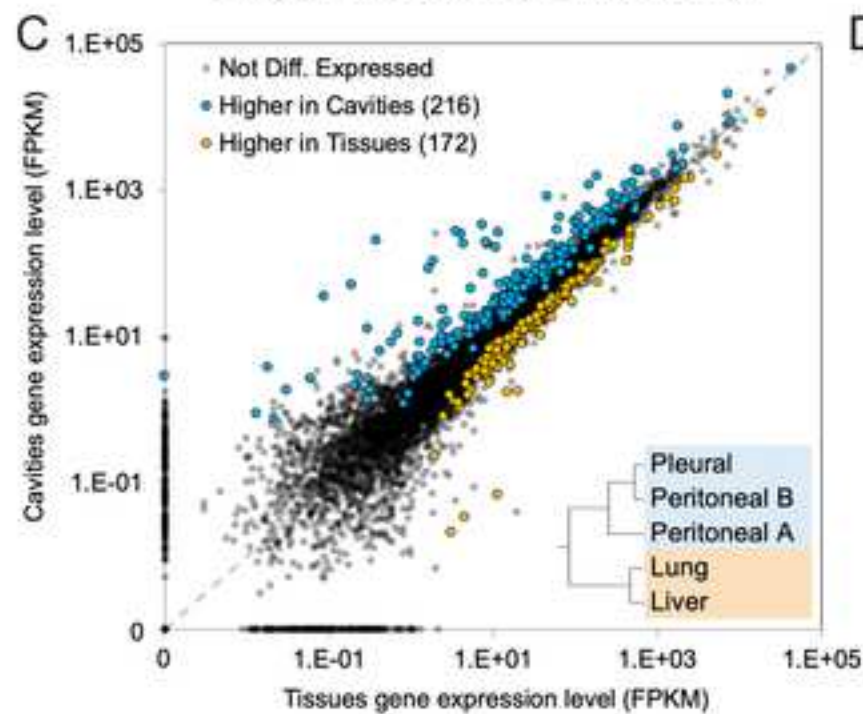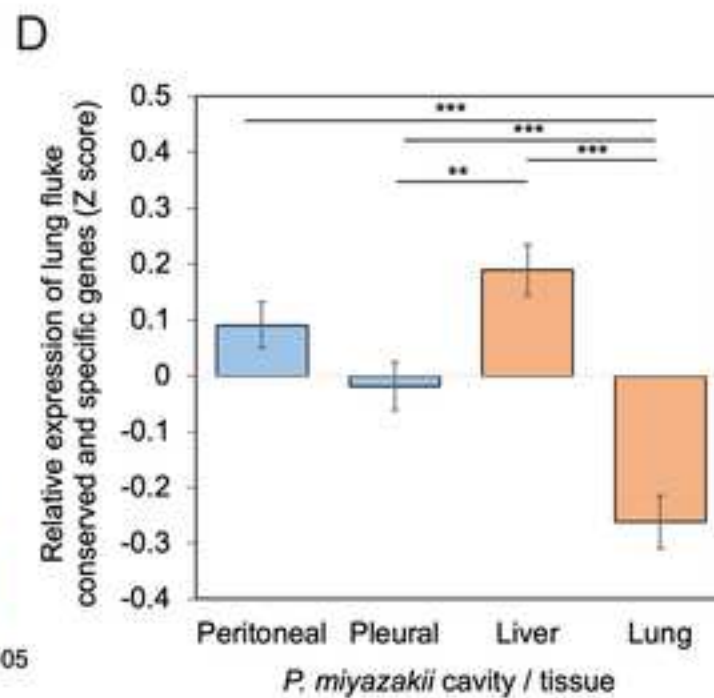



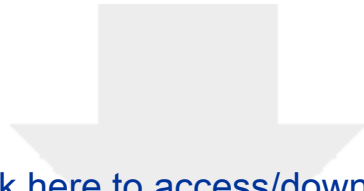

Click here to access/download  
**Supplementary Material**  
Supp Table S1 - Accessions.xlsx

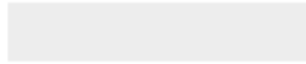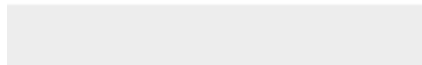





Click here to access/download

**Supplementary Material**

Supp Table S2 - Paragonimus expression data per  
gene.xlsx



Click here to access/download  
**Supplementary Material**  
Supp Table S3 - OGs and FPKM.xlsx

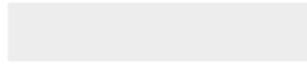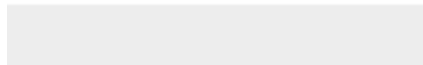

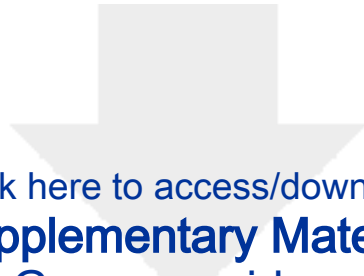

[Click here to access/download](#)

**Supplementary Material**

Supp Table S4 - Genome-wide selection scan.xlsx



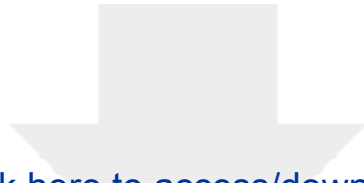

[Click here to access/download](#)

**Supplementary Material**

Supplementary Information (Combined).docx

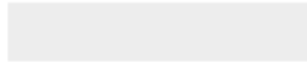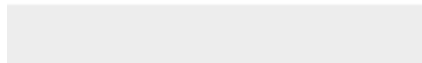

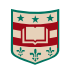

To  
Dr. Laurie Goodman  
Editor-in-Chief  
Gigascience

11/26/2019

Dear Dr. Goodman,

Please accept our manuscript entitled “*Comparative genomics and transcriptomics of four Paragonimus species provide insights into lung fluke parasitism and pathogenesis*” as a candidate for publication in Gigascience.

In this manuscript, we present novel draft genomes, transcriptomes and detailed comparative analyses for four species of *Paragonimus* (lung flukes), which are among the most injurious food-borne helminths, infecting ~23 million people, with ~293 million people at risk for infection. The disease is easily mistaken for tuberculosis due to similar pulmonary symptoms, so there is an urgent need for the development of effective diagnostics, but currently the genomic resources for developing these are lacking.

In addition to characterizing and comparing the four genomes, we also performed orthologous group (OG) analysis spanning 21 species (lung, liver and blood flukes, additional platyhelminths and hosts), to provide insights into lung fluke biology. Among other findings, we identified 256 lung fluke-specific and conserved OGs that were enriched for many parasite-related functions including iron acquisition and immune modulation, and eight “host mimic” OGs including a STOX1 ortholog (proliferation of pulmonary artery cells). Our lung fluke transcriptome analysis identified consistent adult-stage *Paragonimus* expression profiles, and 388 genes differentially expressed between host body cavities and tissues that were enriched for functions including proteolysis, nutrient transport and iron acquisition. In order to accelerate diagnostic antigen research, we matched the new gene sets to previously identified *Paragonimus* diagnostic antigens, providing an opportunity to optimize and ensure consistent cross-reactivity for diagnostic assays.

We anticipate that these novel genomic and transcriptomic resources will be invaluable for future lung fluke research, and flatworm research in general. This report represents a major contribution to ongoing trematode genome sequencing efforts and bootstraps future studies into the biology, evolution and pathogenesis of *Paragonimus* and related food-borne flukes. This study was possible due to the interdisciplinary collaboration among teams across the world (USA, Australia, Japan, Vietnam and Thailand) with expertise in genomics / systems biology, evolutionary genomics and experimental parasitology and pathology.

We believe that our paper is suitable for this journal based on the following:

- The manuscript contains detailed comprehensive analyses of previously unavailable but critically important omics resources for pathogens of importance to human health (the lung flukes).
- We provide accessions for all raw data used in the data production, disseminating all available data to the community.

- We additionally provide supplementary tables formatted as comprehensive Excel databases, that include all gene expression data for every sample in every species, complete functional annotation data for all *P. miyazakii* genes, all calculated differential expression data for all genes, and complete orthologous protein group (OG) data including all gene members spanning 21 species, and the average expression data across the four lung flukes.
- These interactive datasets provide simple open access to all interested researchers, regardless of bioinformatic skill level, and provide all relevant data to reproduce analyses presented in the manuscript.

The manuscript has not been previously published, nor is submitted for publication elsewhere. The authors declare no potential competing interests, and all authors have approved the manuscript for submission. It has been formatted according to the author instructions on the journal's website.

We thank you for your kind consideration.

Yours sincerely,



**Makedonka Mitreva, PhD**

Professor, Department of Medicine and of Genetics,  
Assistant Director, McDonnell Genome Institute,  
Director, Center for Clinical Genomics of Microbial Systems,  
Washington University School of Medicine

We suggest the following reviewers to evaluate the manuscript, based on their research backgrounds:

**James Wasmuth**

[jwasmuth@ucalgary.ca](mailto:jwasmuth@ucalgary.ca)

Associate Professor  
Faculty of Veterinary Medicine  
University of Calgary, Calgary, AB, Canada

**Neil Young**

[nyoung@unimelb.edu.au](mailto:nyoung@unimelb.edu.au)  
NHMRC Career Development Fellow  
Faculty of Veterinary and Agricultural Sciences  
University of Melbourne, Melbourne, Australia

**Aaron Jex**

[ajex@unimelb.edu.au](mailto:ajex@unimelb.edu.au)  
Associate Professor  
Faculty of Veterinary and Agricultural Sciences  
University of Melbourne, Melbourne, Australia

**Philip Loverde**

[loverde@uthscsa.edu](mailto:loverde@uthscsa.edu)  
Professor  
Graduate School of Biomedical Sciences  
UT Health San Antonio, San Antonio, TX, USA

**Tim Anderson**

[tanderso@txbiomed.org](mailto:tanderso@txbiomed.org)  
Professor, Program Co-lead  
Disease Intervention & Prevention  
Texas Biomedical Research Institute, San Antonio, TX, USA
