# Supplementary material for: Comparative genomics and transcriptomics of 4 Paragonimus species provide insights into lung fluke parasitism and pathogenesis
Source: PubMed Central journal article supplement (PMC7370270; doi:10.1093/gigascience/giaa073), 2020-07-20
Supplement: giaa073_giga-d-19-00411_revision_1.pdf [file giaa073_giga-d-19-00411_revision_1.pdf]

# GigaScience

## Comparative genomics and transcriptomics of four *Paragonimus* species provide insights into lung fluke parasitism and pathogenesis

--Manuscript Draft--

|                                                      |                                                                                                                                                                                                                                                                                                                                                                                                                                                                                                                                                                                                                                                                                                                                                                                                                                                                                                                                                                                                                                                                                                                                                                                                                                                                                                                                                                                                                                                                                                                                                                                                                                                                                                                                                                                                                                                                                                                                                                                                                                       |                       |
|------------------------------------------------------|---------------------------------------------------------------------------------------------------------------------------------------------------------------------------------------------------------------------------------------------------------------------------------------------------------------------------------------------------------------------------------------------------------------------------------------------------------------------------------------------------------------------------------------------------------------------------------------------------------------------------------------------------------------------------------------------------------------------------------------------------------------------------------------------------------------------------------------------------------------------------------------------------------------------------------------------------------------------------------------------------------------------------------------------------------------------------------------------------------------------------------------------------------------------------------------------------------------------------------------------------------------------------------------------------------------------------------------------------------------------------------------------------------------------------------------------------------------------------------------------------------------------------------------------------------------------------------------------------------------------------------------------------------------------------------------------------------------------------------------------------------------------------------------------------------------------------------------------------------------------------------------------------------------------------------------------------------------------------------------------------------------------------------------|-----------------------|
| <b>Manuscript Number:</b>                            | GIGA-D-19-00411R1                                                                                                                                                                                                                                                                                                                                                                                                                                                                                                                                                                                                                                                                                                                                                                                                                                                                                                                                                                                                                                                                                                                                                                                                                                                                                                                                                                                                                                                                                                                                                                                                                                                                                                                                                                                                                                                                                                                                                                                                                     |                       |
| <b>Full Title:</b>                                   | Comparative genomics and transcriptomics of four <i>Paragonimus</i> species provide insights into lung fluke parasitism and pathogenesis                                                                                                                                                                                                                                                                                                                                                                                                                                                                                                                                                                                                                                                                                                                                                                                                                                                                                                                                                                                                                                                                                                                                                                                                                                                                                                                                                                                                                                                                                                                                                                                                                                                                                                                                                                                                                                                                                              |                       |
| <b>Article Type:</b>                                 | Research                                                                                                                                                                                                                                                                                                                                                                                                                                                                                                                                                                                                                                                                                                                                                                                                                                                                                                                                                                                                                                                                                                                                                                                                                                                                                                                                                                                                                                                                                                                                                                                                                                                                                                                                                                                                                                                                                                                                                                                                                              |                       |
| <b>Funding Information:</b>                          | National Institutes of Health - National Human Genome Research Institute (U54HG003079)                                                                                                                                                                                                                                                                                                                                                                                                                                                                                                                                                                                                                                                                                                                                                                                                                                                                                                                                                                                                                                                                                                                                                                                                                                                                                                                                                                                                                                                                                                                                                                                                                                                                                                                                                                                                                                                                                                                                                | Dr. Makedonka Mitreva |
|                                                      | National Institutes of Health - National Institute of Allergy and Infectious Diseases (AI081803)                                                                                                                                                                                                                                                                                                                                                                                                                                                                                                                                                                                                                                                                                                                                                                                                                                                                                                                                                                                                                                                                                                                                                                                                                                                                                                                                                                                                                                                                                                                                                                                                                                                                                                                                                                                                                                                                                                                                      | Dr. Makedonka Mitreva |
|                                                      | National Institutes of Health - National Institute of General Medical Sciences (GM097435)                                                                                                                                                                                                                                                                                                                                                                                                                                                                                                                                                                                                                                                                                                                                                                                                                                                                                                                                                                                                                                                                                                                                                                                                                                                                                                                                                                                                                                                                                                                                                                                                                                                                                                                                                                                                                                                                                                                                             | Dr. Makedonka Mitreva |
|                                                      | Thailand Research Fund (TH) - Distinguished Research Professor Grant (DPG6280002)                                                                                                                                                                                                                                                                                                                                                                                                                                                                                                                                                                                                                                                                                                                                                                                                                                                                                                                                                                                                                                                                                                                                                                                                                                                                                                                                                                                                                                                                                                                                                                                                                                                                                                                                                                                                                                                                                                                                                     | Dr. Wanchai Maleewong |
| <b>Abstract:</b>                                     | <p><b>Background</b></p> <p><i>Paragonimus</i> spp. (lung flukes) are among the most injurious food-borne helminths, infecting ~23 million people, (~293 million with infection risk). Paragonimiasis is acquired from infected undercooked crustaceans and primarily affects the lungs, but often causes lesions elsewhere including the brain. The disease is easily mistaken for tuberculosis due to similar pulmonary symptoms, and accordingly, diagnostics are in demand.</p> <p><b>Results</b></p> <p>We assembled, annotated and compared draft genomes of four prevalent and distinct <i>Paragonimus</i> species: <i>P. miyazakii</i>, <i>P. westermani</i>, <i>P. kellicotti</i> and <i>P. heterotremus</i>. Genomes ranged from 697 to 923 Mb, included 12,072 to 12,853 genes, and were 87% to 96% complete according to BUSCO. Orthologous group (OG) analysis spanning 21 species (lung, liver and blood flukes, additional platyhelminths and hosts) provided insights into lung fluke biology, including identifying 256 lung fluke-specific and conserved OGs enriched for iron acquisition, immune modulation and other parasite functions. Transcriptome analysis identified consistent adult-stage <i>Paragonimus</i> expression profiles, and 388 genes differentially expressed between stages in the host body cavities and tissues, enriched for functions including proteolysis, nutrient transport and iron acquisition. Previously identified <i>Paragonimus</i> diagnostic antigens were matched to genes, providing an opportunity to optimize and ensure pan-<i>Paragonimus</i>-reactivity for diagnostic assays.</p> <p><b>Conclusions</b></p> <p>We anticipate that these novel genomic and transcriptomic resources will be invaluable for future lung fluke research. This report represents a major contribution to ongoing trematode genome sequencing efforts and underpins future studies into the biology, evolution and pathogenesis of <i>Paragonimus</i> and related food-borne flukes.</p> |                       |
| <b>Corresponding Author:</b>                         | Makedonka Mitreva                                                                                                                                                                                                                                                                                                                                                                                                                                                                                                                                                                                                                                                                                                                                                                                                                                                                                                                                                                                                                                                                                                                                                                                                                                                                                                                                                                                                                                                                                                                                                                                                                                                                                                                                                                                                                                                                                                                                                                                                                     |                       |
|                                                      | UNITED STATES                                                                                                                                                                                                                                                                                                                                                                                                                                                                                                                                                                                                                                                                                                                                                                                                                                                                                                                                                                                                                                                                                                                                                                                                                                                                                                                                                                                                                                                                                                                                                                                                                                                                                                                                                                                                                                                                                                                                                                                                                         |                       |
| <b>Corresponding Author Secondary Information:</b>   |                                                                                                                                                                                                                                                                                                                                                                                                                                                                                                                                                                                                                                                                                                                                                                                                                                                                                                                                                                                                                                                                                                                                                                                                                                                                                                                                                                                                                                                                                                                                                                                                                                                                                                                                                                                                                                                                                                                                                                                                                                       |                       |
| <b>Corresponding Author's Institution:</b>           |                                                                                                                                                                                                                                                                                                                                                                                                                                                                                                                                                                                                                                                                                                                                                                                                                                                                                                                                                                                                                                                                                                                                                                                                                                                                                                                                                                                                                                                                                                                                                                                                                                                                                                                                                                                                                                                                                                                                                                                                                                       |                       |
| <b>Corresponding Author's Secondary Institution:</b> |                                                                                                                                                                                                                                                                                                                                                                                                                                                                                                                                                                                                                                                                                                                                                                                                                                                                                                                                                                                                                                                                                                                                                                                                                                                                                                                                                                                                                                                                                                                                                                                                                                                                                                                                                                                                                                                                                                                                                                                                                                       |                       |

|                                                                                                                                                                                                                                                                                                  |                                                                           |
|--------------------------------------------------------------------------------------------------------------------------------------------------------------------------------------------------------------------------------------------------------------------------------------------------|---------------------------------------------------------------------------|
| <b>First Author:</b>                                                                                                                                                                                                                                                                             | Bruce A Rosa                                                              |
| <b>First Author Secondary Information:</b>                                                                                                                                                                                                                                                       |                                                                           |
| <b>Order of Authors:</b>                                                                                                                                                                                                                                                                         | Bruce A Rosa                                                              |
|                                                                                                                                                                                                                                                                                                  | Young-Jun Choi                                                            |
|                                                                                                                                                                                                                                                                                                  | Samantha N McNulty                                                        |
|                                                                                                                                                                                                                                                                                                  | Hyeim Jung                                                                |
|                                                                                                                                                                                                                                                                                                  | John Martin                                                               |
|                                                                                                                                                                                                                                                                                                  | Takeshi Agatsuma                                                          |
|                                                                                                                                                                                                                                                                                                  | Hiromu Sugiyama                                                           |
|                                                                                                                                                                                                                                                                                                  | Thanh Le Hoa                                                              |
|                                                                                                                                                                                                                                                                                                  | Pham Ngoc Doanh                                                           |
|                                                                                                                                                                                                                                                                                                  | Wanchai Maleewong                                                         |
|                                                                                                                                                                                                                                                                                                  | David Blair                                                               |
|                                                                                                                                                                                                                                                                                                  | Paul J. Brindley                                                          |
|                                                                                                                                                                                                                                                                                                  | Peter U. Fischer                                                          |
|                                                                                                                                                                                                                                                                                                  | Makedonka Mitreva                                                         |
| <b>Order of Authors Secondary Information:</b>                                                                                                                                                                                                                                                   |                                                                           |
| <b>Response to Reviewers:</b>                                                                                                                                                                                                                                                                    | Please see attached point-by-point response file (at the end of the PDF). |
| <b>Additional Information:</b>                                                                                                                                                                                                                                                                   |                                                                           |
| <b>Question</b>                                                                                                                                                                                                                                                                                  | <b>Response</b>                                                           |
| Are you submitting this manuscript to a special series or article collection?                                                                                                                                                                                                                    | No                                                                        |
| <b>Experimental design and statistics</b>                                                                                                                                                                                                                                                        | Yes                                                                       |
| Full details of the experimental design and statistical methods used should be given in the Methods section, as detailed in our <a href="#">Minimum Standards Reporting Checklist</a> . Information essential to interpreting the data presented should be made available in the figure legends. |                                                                           |
| Have you included all the information requested in your manuscript?                                                                                                                                                                                                                              |                                                                           |
| <b>Resources</b>                                                                                                                                                                                                                                                                                 | Yes                                                                       |
| A description of all resources used, including antibodies, cell lines, animals and software tools, with enough information to allow them to be uniquely identified, should be included in the                                                                                                    |                                                                           |

|                                                                                                                                                                                                                                                                                                                                                                                                                                                                                                                                                         |            |
|---------------------------------------------------------------------------------------------------------------------------------------------------------------------------------------------------------------------------------------------------------------------------------------------------------------------------------------------------------------------------------------------------------------------------------------------------------------------------------------------------------------------------------------------------------|------------|
| <p>Methods section. Authors are strongly encouraged to cite <a href="#">Research Resource Identifiers</a> (RRIDs) for antibodies, model organisms and tools, where possible.</p> <p>Have you included the information requested as detailed in our <a href="#">Minimum Standards Reporting Checklist</a>?</p>                                                                                                                                                                                                                                           |            |
| <p><b>Availability of data and materials</b></p> <p>All datasets and code on which the conclusions of the paper rely must be either included in your submission or deposited in <a href="#">publicly available repositories</a> (where available and ethically appropriate), referencing such data using a unique identifier in the references and in the “Availability of Data and Materials” section of your manuscript.</p> <p>Have you have met the above requirement as detailed in our <a href="#">Minimum Standards Reporting Checklist</a>?</p> | <p>Yes</p> |

1 **Comparative genomics and transcriptomics of four *Paragonimus* species provide insights into lung**  
2 **fluke parasitism and pathogenesis**

3 Bruce A. Rosa<sup>1\*</sup>, Young-Jun Choi<sup>1\*</sup>, Samantha N. McNulty<sup>2</sup>, Hyeim Jung<sup>1</sup>, John Martin<sup>1</sup>, Takeshi Agatsuma<sup>3</sup>,  
4 Hiromu Sugiyama<sup>4</sup>, Thanh Le Hoa<sup>5</sup>, Pham Ngoc Doanh<sup>6,7</sup>, Wanchai Maleewong<sup>8</sup>, David Blair<sup>9</sup>, Paul J. Brindley<sup>10</sup>,  
5 Peter U. Fischer<sup>1</sup>, Makedonka Mitreva<sup>1,2†</sup>

6 <sup>1</sup>Department of Internal Medicine, Washington University School of Medicine, St. Louis, MO 63110, USA

7 <sup>2</sup>The McDonnell Genome Institute at Washington University, School of Medicine, St. Louis, MO 63108, USA

8 <sup>3</sup>Department of Environmental Health Sciences, Kochi Medical School, Oko, Nankoku City, Kochi 783-8505,  
9 Japan

10 <sup>4</sup>Laboratory of Helminthology, Department of Parasitology, National Institute of Infectious Diseases, Tokyo 162-  
11 8640, Japan

12 <sup>5</sup>Department of Immunology, Institute of Biotechnology, Vietnam Academy of Science and Technology, Hanoi,  
13 Vietnam

14 <sup>6</sup>Institute of Ecology and Biological Resources, Vietnam Academy of Science and Technology, Hanoi, Vietnam

15 <sup>7</sup>Graduate University of Science and Technology, Vietnam Academy of Science and Technology, Hanoi, Vietnam

16 <sup>8</sup>Research and Diagnostic Center for Emerging Infectious Diseases, Khon Kaen University, Khon Kaen,  
17 Thailand, Department of Parasitology, Faculty of Medicine, Khon Kaen University, Khon Kaen, Thailand

18 <sup>9</sup>College of Marine and Environmental Sciences, James Cook University, Townsville, Queensland 4811,  
19 Australia

20 <sup>10</sup>Departments of Microbiology, Immunology and Tropical Medicine, and Research Center for Neglected  
21 Diseases of Poverty, and Pathology School of Medicine & Health Sciences, George Washington University,  
22 Washington, DC 20037, USA

23 \*Authors contributed equally to this work

24 †Correspondence should be addressed to Makedonka Mitreva. Tel. +1-314-285-2005,

25 Fax +1-314-286-1800, Email: [mmitreva@wustl.edu](mailto:mmitreva@wustl.edu)

26

27

28 **Emails:**

29 Bruce A. Rosa: [barosa@wustl.edu](mailto:barosa@wustl.edu)

30 Young-Jun Choi: [choi.y@wustl.edu](mailto:choi.y@wustl.edu)

31 Samantha N. McNulty: [samantha.n.mcnulty@gmail.com](mailto:samantha.n.mcnulty@gmail.com)

32 Hyeim Jung: [jungh@wustl.edu](mailto:jungh@wustl.edu)

33 John Martin: [jmartin@wustl.edu](mailto:jmartin@wustl.edu)

34 Takeshi Agatsuma: [agatsuma@kochi-u.ac.jp](mailto:agatsuma@kochi-u.ac.jp)

35 Hiromu Sugiyama: [hsugi@niid.go.jp](mailto:hsugi@niid.go.jp)

36 Thanh Le Hoa: [imibtvn@gmail.com](mailto:imibtvn@gmail.com)

37 Pham Ngoc Doanh: [pndoanh@yahoo.com](mailto:pndoanh@yahoo.com)

38 Wanchai Maleewong: [wanch\\_ma@kku.ac.th](mailto:wanch_ma@kku.ac.th)

39 David Blair: [david.blair@jcu.edu.au](mailto:david.blair@jcu.edu.au)

40 Paul J. Brindley: [pbrindley@gwu.edu](mailto:pbrindley@gwu.edu)

41 Peter U. Fischer: [pufischer@wustl.edu](mailto:pufischer@wustl.edu)

42 Makedonka Mitreva: [mmitreva@wustl.edu](mailto:mmitreva@wustl.edu)

43

44 **Keywords**

45 Lung flukes, genomics, transcriptomics, paragonimiasis, infectious disease, trematodes

46

47

48

49

50

51

52

53

54

55

56 **Abstract**

57 Background

58 *Paragonimus* spp. (lung flukes) are among the most injurious food-borne helminths, infecting ~23 million people,  
59 (~293 million with infection risk). Paragonimiasis is acquired from infected undercooked crustaceans and  
60 primarily affects the lungs, but often causes lesions elsewhere including the brain. The disease is easily mistaken  
61 for tuberculosis due to similar pulmonary symptoms, and accordingly, diagnostics are in demand.

62 Results

63 We assembled, annotated and compared draft genomes of four prevalent and distinct *Paragonimus* species: *P.*  
64 *miyazakii*, *P. westermani*, *P. kellicotti* and *P. heterotremus*. Genomes ranged from 697 to 923 Mb, included  
65 12,072 to 12,853 genes, and were 87% to 96% complete according to BUSCO. Orthologous group (OG) analysis  
66 spanning 21 species (lung, liver and blood flukes, additional platyhelminths and hosts) provided insights into  
67 lung fluke biology, including identifying 256 lung fluke-specific and conserved OGs enriched for iron acquisition,  
68 immune modulation and other parasite functions. Transcriptome analysis identified consistent adult-stage  
69 *Paragonimus* expression profiles, and 388 genes differentially expressed between stages in the host body  
70 cavities and tissues, enriched for functions including proteolysis, nutrient transport and iron acquisition.  
71 Previously identified *Paragonimus* diagnostic antigens were matched to genes, providing an opportunity to  
72 optimize and ensure pan-*Paragonimus*-reactivity for diagnostic assays.

73 Conclusions

74 We anticipate that these novel genomic and transcriptomic resources will be invaluable for future lung fluke research.  
75 This report represents a major contribution to ongoing trematode genome sequencing efforts and underpins  
76 future studies into the biology, evolution and pathogenesis of *Paragonimus* and related food-borne flukes.

77

78

79

80

81

## 82 **Background**

83 The trematode genus *Paragonimus*, the lung flukes, is among the most injurious taxon of food-borne  
84 helminths. About 23 million people are infected with lung flukes [1], an estimated 292 million people are at-risk,  
85 mainly in eastern Asia [2] , and billions of people live in areas where *Paragonimus* infections of animals are endemic.  
86 The life-cycle of *Paragonimus* species involves freshwater snails, crustacean intermediate hosts and mammals in  
87 Asia, parts of Africa, and the Americas [3]. Human paragonimiasis is acquired by consuming raw or undercooked  
88 shrimp and crabs containing the metacercaria, which is the infective stage. Although primarily affecting the lungs,  
89 lesions can occur at other sites, including the brain [4], and pulmonary paragonimiasis is frequently mistaken for  
90 tuberculosis due to similar respiratory symptoms [4].

91 Pathogenesis ensues because of the migration of the newly invading juveniles from the gut to the lungs  
92 and through not-infrequent ectopic migration to the brain, reproductive organs, and subcutaneous sites at the  
93 extremities, and because of toxins and other mediators released by the parasites during the larval migration [4,  
94 5]. The presence of the flukes in the lung causes hemorrhage, inflammation with leukocytic infiltration and  
95 necrosis of lung parenchyma that gradually proceeds to the development of fibrotic encapsulation except for a  
96 fistula from the evolving lesion to the respiratory tract. Eggs of the lung fluke exit the encapsulated lesion through  
97 the fistula to reach the sputum and/or feces of the host, where they pass to the external environment,  
98 accomplishing transmission of the parasite [6]. There are signs and symptoms that allow characterization of  
99 acute and chronic stages of paragonimiasis. In pulmonary paragonimiasis, for example, the most noticeable  
100 clinical symptom of an infected individual is a chronic cough with gelatinous, rusty brown, pneumonia-like, blood-  
101 streaked sputum [6]. Heavy work commonly induces hemoptysis. Pneumothorax, empyema from secondary  
102 bacterial infection and pleural effusion might also be presented. When symptoms include only a chronic cough,  
103 the disease may be misinterpreted as chronic bronchitis and bronchiectasis or bronchial asthma. Pulmonary  
104 paragonimiasis is frequently confused with pulmonary tuberculosis [7]. The symptoms of extra-pulmonary  
105 paragonimiasis vary depending on the location of the fluke, including cerebral [5] and abdominal paragonimiasis  
106 [6].

107 *Paragonimus* is a large genus that includes more than 50 nominal species [8]. Seven of these species or  
108 species complexes of *Paragonimus* are known to infect humans [3]. This is also an ancient genus, thought to have  
109 originated before the breakup of Gondwana [9], but possibly also dispersing as colonists from the original East

110 Asian clade, based on the distribution of host species [10]. To improve our understanding of pathogens across  
111 this genus at the molecular level, we have assembled, annotated and compared draft genomes of four of these,  
112 three from Asia (*P. westermani* from Japan, *P. heterotremus*, *P. miyazakii*) and one from North America (*P.*  
113 *kelllicotti*). Among them, *P. westermani* is the best-known species causing pulmonary paragonimiasis. This name  
114 has been applied to a genetically and geographically diverse complex of lung fluke populations differing widely in  
115 biological features including infectivity to humans [11]. The complex extends from India and Sri Lanka eastwards to  
116 Siberia, Korea and Japan, and southwards into Vietnam, Indonesia and the Philippines. However, human infections  
117 are reported primarily from China, Korea, Japan and the Philippines. Until this study, an Indian member of the *P.*  
118 *westermani* complex was the only lung fluke species for which a genome sequence was available [12].  
119 *Paragonimus heterotremus* is the most common cause of pulmonary paragonimiasis in southern China, Lao PDR,  
120 Vietnam, northeastern India and Thailand [6, 8]. *Paragonimus miyazakii* is a member of the *P. skrjabini* complex,  
121 to which Blair and co-workers accorded sub-specific status [13]. Flukes of this complex tend not to mature in  
122 humans but frequently cause ectopic disease at diverse sites, including the brain. In North America, infection with  
123 *P. kelllicotti* is primarily a disease of native, crayfish-eating mammals including the otter and mink. The occasional  
124 human infections can be severe, and thoracic involvement is typical [14, 15].

125 These four species represent a broad sampling of the phylogenetic diversity of the genus. Most of the  
126 known diversity, as revealed by DNA sequences from portions of the mitochondrial genome and the nuclear  
127 ribosomal genes, resides in Asia [16]. Analysis of the ITS2 marker by Blair et al [16] indicates that each of the  
128 species sequenced occupies a distinct clade within the phylogenetic tree.

129 In addition to a greater understanding of the genome contents of this group of food-borne trematodes, the  
130 findings presented here provide new information to assist development of diagnostic tools and recognition of  
131 potential drug targets. The findings will facilitate evolutionary, zoogeographical and phylogenetic investigation of the  
132 genus *Paragonimus* and its host-parasite relationships through the comparative analysis of gene content relative to  
133 other sequenced platyhelminth and host species, as well as through a comparative transcriptomic analysis.



## 138 Results and Discussion

### 139 Genome features

140 The sizes of the four novel *Paragonimus* genomes range from 697 to 923 Mb, containing between 12,072  
141 and 12,853 genes. These draft genomes are estimated to be between 87% and 96% complete, according to  
142 BUSCO completeness estimates that include complete and fragmented eukaryote genes [17], with the new *P.*  
143 *westermani* genome produced from a sample collected from Japan being slightly more complete than the  
144 previously-sequenced genome produced from a sample collected from India [12] (96.4% vs 94.1%, respectively;  
145 **Table 1**). Here, statements about *P. westermani* apply to the new Japanese genome, unless otherwise stated.  
146 The total genome lengths of the *Paragonimus* spp. are larger than those of the Schistosomatidae and  
147 Opisthorchiidae, but smaller than those of Fasciolidae. However, the total numbers of protein-coding genes are  
148 comparable (**Table 1**). Repetitive sequences occupy between 49% and 54% of the *Paragonimus* genomes  
149 (**Figure 1A**). The repeat landscapes, depicting the relative abundance of repeat classes in the genome, versus  
150 the Kimura divergence from the consensus, revealed that *P. kellicotti* in particular has a significant number of  
151 copies of transposable elements (TE) with high similarity to consensus (Kimura substitution level: 0-5), indicating  
152 recent and current TE activity (**Figure 1B**). In a recent study [18], TE activity in the Fasciolidae was found to be  
153 low. TEs are potent sources of mutation that can rapidly create genetic variance, especially following genetic  
154 bottlenecks and environmental changes, providing bursts of allelic and phenotypic diversity upon which selection  
155 can act [19, 20]. Therefore, changes in TE activity, modulated by environmentally induced physiological or  
156 genomic stress, may have a major effect on adaptation of populations and species facing novel habitats and  
157 large environmental perturbations [21].

158 Focusing on the gene content, *P. kellicotti* had the shortest average total gene length among the species,  
159 and the lung flukes overall had similar gene lengths to other flukes, while platyhelminth species other than  
160 trematodes have shorter genes overall (**Figure 2A**). The variability in gene lengths observed between species  
161 results from differences in both average intron lengths (**Figure 2B**) and the average number of exons per gene  
162 (**Figure 2C**) while the average coding sequence (CDS) lengths of the exons across all the platyhelminth species  
163 were similar to each other (**Figure 2D**). Whereas there was species-to-species variability in gene lengths and  
164 exon counts, consistent patterns among the types of flukes were not apparent. Some of this variability may have

165 arisen due to the variation in quality of the assemblies, but these differences were minimized by only using  
166 complete gene models with a start and stop codon identified in the same frame.

167 Mitochondrial whole genome-based clustering was performed for the four *Paragonimus* species plus  
168 some additional existing mitochondrial genome assemblies for *P. ohirai* and four for *P. westermani*, including  
169 previously-sequenced mitochondrial genomes of *Paragonimus* (**Figure 3A**). This indicated that our Japanese *P.*  
170 *westermani* sample clustered with the existing known *P. westermani* samples from eastern Asia, and that all the  
171 other three newly sequenced species were distinct from *P. ohirai*.

172 We generated a PacBio long-read based mitochondrial assembly for *P. kellicotti*. The fully circularized  
173 complete genome was 17.3 kb in length, including a 3.7 kb non-coding repeat region between *tRNA<sup>Gly</sup>* and *cox3*  
174 (**Supplementary Figure S1**). There are seven copies of long repeats (378 bp) and 9.5 copies of short repeats  
175 (111 bp). The long repeats overlap with six copies of *tRNA<sup>Glu</sup>*. This structural organization of repeat sequences  
176 does not resemble those found in *Paragonimus ohirai* [12] and *P. westermani* [12] where the non-coding region  
177 is partitioned by *tRNA<sup>Glu</sup>* into two parts.

178 Clustering of the four new lung fluke genomes, four liver fluke genomes, three blood fluke genomes, five  
179 other platyhelminth species, four host species and a yeast outgroup was performed based on the shared  
180 phylogeny among orthologous protein groups. These findings mirrored the mitochondrial clustering results for  
181 the lung fluke species (**Figure 3B**), indicating that *P. westermani* is the earlier-diverging taxon, as previously  
182 suggested based on ribosomal RNA [22].

183 Although our *P. westermani* reference genome was assembled using samples collected from Japan  
184 (Amakusa, Kyusyu). We compared the genomic sequences of our East Asian *P. westermani* to the recently  
185 published *P. westermani* genome from India (Changlang, Arunachal Pradesh) [12] to estimate the genetic  
186 divergence between geographically diverse samples. This analysis identified an average nucleotide sequence  
187 identity of 87.6%.

### 188 Gene-family dynamics identify expanded functions distinguishing lung fluke species

189 We investigated large-scale differences in gene complements among families of digenetic trematodes  
190 (**Figure 4A**) and modeled gene gain and loss while accounting for the phylogenetic history of species [23]. Gene  
191 families of interest that displayed pronounced differential expansion or contraction (**Figure 4B**) included the  
192

193 papain-family cysteine proteases, cathepsins L, B and F, dynein heavy chain, spectrin/dystrophin, heat shock  
194 70 kDa protein, major vault protein, and multidrug resistance protein. Total protease and protease inhibitor  
195 counts are shown in **Figure 4C**.

196 Lineage-specific expansion was observed in cathepsin F genes in *Paragonimus* spp. *Paragonimus*  
197 *miyazakii* RNA-seq reads showed that nine cathepsin F genes (out of 24 total) were differentially expressed, with  
198 expression levels in (peritoneal and pleural) cavity stage parasites significantly higher than in the tissue (lung  
199 and liver) developmental stages. Gene expression levels for each gene are provided in **Supplementary Table**  
200 **S2**. This suggested that (1) these enzymes are highly expressed during parasite penetration of the intestinal wall  
201 and invasion and migration through the abdominal and thoracic cavities (1- to 7-week-old immature stages), and  
202 (2) they might participate in metacercarial excystment, tissue invasion/migration and immune evasion. The  
203 remaining 15 constitutively expressed cathepsin F genes may have roles in nutrient digestion and remodeling of  
204 other physiologically active molecules. Ahn et al. [24] also reported differential expression of cathepsin F genes  
205 during development of *P. westermani*, and showed that most are highly immunogenic. This flagged them as  
206 prospective diagnostic targets. The importance of cathepsin F for *Paragonimus* contrasts with its function in the  
207 fasciolids, where cathepsin L genes are expanded and are thought to play a more critical role in host invasion  
208 [18, 25].

209 Differential expansion of cytoskeletal molecules is of interest in the context of tegument physiology [26].  
210 Dynein is a microtubule motor protein, which transports intracellular cargo. Spectrin is an actin-binding protein,  
211 with a key role in maintenance of integrity of the plasma membrane. Dystrophin links microfilaments with  
212 extracellular matrix. The syncytial tegument of the surface of flatworms is a complex structure and a major  
213 adaptation to parasitism, and plays critical roles in nutrient uptake, immune response modulation and evasion,  
214 and other processes [26].

215 In *Paragonimus* spp., expanded gene families included heat shock proteins (HSPs), major vault proteins,  
216 and multidrug resistance proteins that play roles in maintaining cellular homeostasis under stress conditions.  
217 HSPs of flatworm parasites play a key role as molecular chaperones in the maintenance of protein homeostasis.  
218 They also are immunogenic and immunomodulatory. HSP is the most abundant family of proteins in the immature  
219 and mature egg of *Schistosoma mansoni*, and in the miracidium [27] and is highly abundant in the tegument of  
220 the adult schistosome [28]. In addition, HSP is abundant in the excretory/secretory products of the adult

221 *Schistosoma japonicum* blood fluke [29]. HSP stimulates diverse immune cells, eliciting release of pro- and anti-  
222 inflammatory cytokines [30], binds human LDL (the purpose of which is unknown but may be associated with  
223 transport of apoprotein B or in lipid trafficking [31]) and, given these properties, HSP represents a promising  
224 vaccine and diagnostic candidate [32]. Vaults, ribonucleoprotein complexes, are highly conserved in eukaryotes.  
225 Although their exact function remains unclear, it may be associated with multidrug resistance phenotypes and  
226 with signal transduction. In *S. mansoni*, up-regulation of major vault protein has been observed during the  
227 transition from cercaria to schistosomulum and in praziquantel-resistant adult worms [33]. ATP-binding cassette  
228 transporters (ABC transporters) are essential components of cellular physiological machinery, and some ABC  
229 transporters, including P-glycoproteins, pump toxins and xenobiotics out of the cell. Overexpression of P-  
230 glycoprotein has been reported in a praziquantel-resistant *S. mansoni* [34].

#### 232 Tetraspanin sequence evolution in *P. kellicotti*

233 We searched for genes that evolved under positive selection in the four *Paragonimus* spp. based on the  
234 non-synonymous to synonymous substitution rate ratio ( $d_N/d_S$ ). We conducted the branch-site test of positive  
235 selection to identify adaptive gene variants that became fixed in each species [35] (**Supplementary Table S3**).  
236 A tetraspanin from *P. kellicotti* (PKEL\_00573) reached statistical significance after correction for multiple testing  
237 ( $d_N/d_S = 9.9$ , FDR = 0.018). Tetraspanins are small integral proteins bearing four transmembrane domains which  
238 form two extracellular loops [36]. In trematodes, they are major components of the tegument at the host-parasite  
239 interface [37], are highly immunogenic vaccine antigens [38, 39], and may play a role in immune evasion [40]. In  
240 the tetraspanin sequence of *P. kellicotti*, we detected six amino acid sites under positive selection  
241 (**Supplementary Figure S2**). Five of the six sites were predicted to be located within the extracellular loops  
242 believed to interact with the immune system of the host. A similar pattern of positive selection within regions that  
243 code for extracellular loops has been reported in tetraspanin-23 from African *Schistosoma* species [41].

#### 245 Gene phylogeny analysis identifies functions conserved and specific to fluke groups

246 We classified orthologous groups (OGs) based on phlogenetic distribution of proteins from each of the  
247 21 species (**Figure 3B**). Complete gene counts and lists per species and per OG are provided in **Supplementary**  
248 **Table S4**. These results were parsed to identify the OGs containing members among the platyhelminth species,

249 and those that were conserved across all members of each group (lung, liver, and blood flukes, and other  
250 platyhelminth species (**Figure 5A**). This analysis identified 256 OGs that were conserved among, and exclusive  
251 to, the lung flukes (**Figures 5A and 5B**). The lung fluke-conserved and -specific genes were significantly  
252 enriched for several gene ontology (GO) terms (**Table 2**; using *P. miyazakii* genes to test significance), most of  
253 which were related to peptidase activity (including serine proteases which are involved in host tissue invasion,  
254 anticoagulation, and immune evasion [42]), as well as “iron binding” (which may be related to novel iron  
255 acquisition mechanisms from host tissue, which is not well understood in most metazoan parasites, but has been  
256 described in schistosomes [43]).

257       Expansion of unique aspartic proteases (including those predicted to be retropepsins) and other  
258 peptidases in the lung flukes may be associated with digestion of ingested blood, given the key role of this  
259 category of hydrolases and their inhibitors in nutrition and digestion of hemoglobin by schistosomes, and indeed  
260 other blood-feeding worms including hookworms [44, 45]. Given that pulmonary hemorrhage and hemoptysis  
261 are cardinal signs of lung fluke infection, it can be anticipated that the lung flukes ingest host blood when localized  
262 at the ulcerous lesion induced in the pulmonary parenchyma by infection. Overall, protease counts across  
263 species were similar (**Figure 4C**) although *P. kellicotti* had substantially fewer protease inhibitors compared to  
264 the other *Paragonimus* species (34 vs 57, 62 and 66), *F. hepatica* (61) and *S. mansoni* (55). Protease inhibitors  
265 in flukes are thought to be important for creating a safe environment for the parasite inside the host by inhibiting  
266 and regulating protease activity and immunomodulation [91], so this may suggest a novel host interaction  
267 strategy by *P. kellicotti*.

268       Analysis of the adult-stage gene expression levels of the discrete protease classes (**Supplementary**  
269 **Figure S3**) did not identify substantial differences among the *Paragonimus* species, except for a lower  
270 expression of threonine proteases in *P. kellicotti*. During the adult stage, cysteine proteases in all *Paragonimus*  
271 species exhibited significantly higher expression overall compared to *F. hepatica*, but similar expression levels  
272 to *S. mansoni*. A previous study identified immunodominant excretory-secretory cysteine proteases of adult  
273 *Paragonimus westermani* involved in immune evasion [46] and another study identified critical roles for  
274 excretory-secretory cysteine proteases during tissue invasion by newly excysted metacercariae of *P. westermani*  
275 [47]. The rapid diversification and critical host-interaction functions of the proteases highlights their importance,  
276 both in terms of understanding *Paragonimus* biology and in terms of identifying targets for control.

277 Functional enrichment analysis among the lung, liver and blood fluke conserved-and-exclusive OGs  
278 (**Figure 5C**) indicated that each family of fluke has evolved a distinct set of aspartic peptidases, trematode  
279 eggshell synthesis genes and saposin-like genes (which interact with lipids and are strongly immunogenic during  
280 fascioliasis [48]). The lung flukes, meanwhile, have uniquely expanded sets of serine proteases, as well as other  
281 genes families with functions including FAR1 DNA binding (a class of proteins which are important secreted  
282 host-interacting proteins in some parasitic nematodes [49]), fatty-acid binding, and ferritin-like functions  
283 (intracellular proteins involved in iron metabolism, localized in vitelline follicles and eggs [50]).

#### 284 Gene expression analysis identifies stage-specific lung fluke functions

285 Lung (adult) stage RNA-Seq datasets were collected for each of the four lung fluke species (accessions  
286 in **Supplementary Table S1**), and reads were mapped to each of their respective genomes. Based on the 1:1  
287 gene orthologs (as defined by the previously described OG dataset), the orthologous genes across the lung  
288 flukes had consistent adult-stage gene expression levels, with Pearson correlations ranging from 0.72 to 0.85  
289 (**Figure 6A, 6B**). Worms from additional life cycle stages were collected for *P. miyazakii*, including samples  
290 sequenced from cavities (peritoneal and pleural cavities) and tissues (lung and liver). Based on gene expression  
291 profiles across all genes, the cavity samples clustered and correlated more closely with each other than with the  
292 peritoneal samples (and vice versa; **Supplementary Figure S1**). Differential expression analysis comparing  
293 tissue and cavity stages identified 216 genes significantly overexpressed in the cavities relative to the tissues,  
294 and 172 genes significantly overexpressed in the tissues relative to the cavities (**Figure 6C**). Functional  
295 enrichment among these gene sets (**Table 3**) indicates that within the cavities, *P. miyazakii* overexpresses genes  
296 related to cysteine peptidase activity (critical for larval migration through host tissues [51]), iron ion binding  
297 (related to oxygen scavenging), and sulfotransferase (responsible for anthelmintic resistance in *S. mansoni* [52]).  
298 Within the tissues, *P. miyazakii* overexpresses genes related to cytoskeleton and microtubules, lyases and  
299 phosphatases, carbon-oxygen lyase and ribonucleotide binding.

300  
301 The *P. miyazakii* genes belonging to the lung fluke-conserved and -exclusive OGs (described above) on  
302 average had significantly higher expression levels in the liver stage compared to the pleural cavity and lung  
303 stages, and significantly lower expression in the lung stage compared to all of the other stages. These results  
304 suggest that most of these OGs contain genes that are actively expressed during the transit through the host

mammal, en route to the lungs (**Figure 6D**), although some were more highly expressed in the lung stage (**Table 4**), and these genes had annotated functions including serine and aspartic peptidases and an MFS transporter gene (transports nutrients and ions between cells and the environment [53]). However, to confirm these gene expression patterns for specific larval stages, followup studies with additional biological replicates are needed. Gene expression levels and orthologous group identifiers for each gene in each of the four species are provided in **Supplementary Table S2**, along with detailed functional annotations for each of the *P. miyazakii* genes.

This stage-specific gene expression offers insight into known and novel biological functions of lung flukes at different developmental stages and within different organs and tissues of the mammalian host and represents a sophisticated new resource for study of specific genes of the lung fluke.

#### Treatments, vaccine targets and diagnostics

The World Health Organization (WHO) currently recommends the use of praziquantel or, as a backup, triclabendazole for the treatment of paragonimiasis; both are highly effective for curing infections [54]. However, there are concerns about the development of resistance to these drugs; triclabendazole resistance of *P. westermani* was reported in a human case from Korea [55]. Furthermore, there is widespread resistance to triclabendazole in liver flukes in cattle in Australia and South America [56], and praziquantel resistance is anticipated in the future due to its widespread use as a single treatment for schistosomiasis, a worrisome situation which has encouraged the search for novel drugs [57]. The comparative analysis presented here identifies valuable putative protein targets for drug development, including *Paragonimus*-specific proteins and trematode-conserved proteins which do not share orthology to human proteins. The protein annotation data available in **Supplementary Table S2** also will enable prioritization including biological functional annotations [58, 59], protein weight and pi predictions [60], predictions of signal peptides and transmembrane domains [61] and cellular compartment localization [58], and sequence similarity matches to targets in the ChEMBL database [62]. This information can provide a starting point for future bioinformatic prioritization and drug testing (**Supplementary Tables S2 and S3**).

Vaccination to prevent future infections would offer an attractive alternative to treatment, but development of vaccine protection against trematode infection has so far been unsuccessful and is unlikely to be practical for

332 paragonimiasis in the near future [63]. However, the complete genome sequences and comparative analysis of  
333 the gene sets presented here provide valuable resources for future vaccine target development.

334 Pulmonary paragonimiasis is frequently mistaken for tuberculosis or pneumonia, and often patients do  
335 not shed eggs, which leads to false positive diagnoses of other conditions such as malaria or pneumonia [4, 64,  
336 65]. This highlights a pressing need for accurate, rapid and affordable diagnostic approaches for paragonimiasis,  
337 a topic which has been the focus of numerous reports. We performed BLAST sequence similarity searches of  
338 previously identified *Paragonimus* diagnostic antigen targets among the four species (**Supplementary Figure**  
339 **S5**). These included: (i) *P. westermani* and *P. pseudoheterotremus* cysteine proteases identified in two previous  
340 studies [66, 67] (matching to the same protein targets from both studies in *P. heterotremus* and *P. kellicotti*), one  
341 of which had high adult-stage expression levels in all four species [66]; (ii) three different tyrosine kinases (one  
342 of which was identified in two different studies, in *Clonorchis sinensis* and in *P. westermani* [68, 69]), all of which  
343 had relatively low gene expression levels in adult stages; (iii) a previously unannotated *P. heterotremus* ELISA  
344 antigen [70] with low expression across life cycle stages, which we now annotate as a saposin protein (which  
345 we found to rapidly evolve among flukes [**Figure 5C**], and which is strongly immunogenic in fascioliasis [48]);  
346 (iv) eggshell proteins of *P. westermani* [71], for which we now provide full-length sequences. We observed that  
347 this gene was conserved across and specific to the lung flukes, with lower gene expression in the young adult  
348 stage (*P. heterotremus*), but higher expression in the adult stages of all species; (v) among serodiagnostic *P.*  
349 *kellicotti* antigens based on a transcriptome assembly and proteomic evidence [72], we identified the top 10 of  
350 the 25 prioritized transcripts that best matched between the transcript sequence and the newly annotated draft  
351 genome of *P. kellicotti*. Thereafter, the full-length gene sequence in *P. kellicotti* was employed to query the other  
352 species. Several of these were highly expressed in the adult stage of all four species, including one that is fluke  
353 specific (PKEL\_05597). However, not all of these had high sequence conservation across all species, with two  
354 only having weak hits in *P. heterotremus* (PKEL\_00171 and PKEL\_01872).

355 As a result of this newly developed genomic resource for the lung flukes, previously identified diagnostic  
356 targets were identified with full gene sequences across all four species. The complete gene sequences,  
357 conservation information and transcriptomic gene expression data for these target proteins can allow for  
358 optimization of the targets for diagnostic testing that is effective on species spanning the genus (**Supplementary**



359 **Figure S5**). This is noteworthy given the absence of a standardized, commercially-available test for  
360 serodiagnosis for human paragonimiasis.

## 362 **Conclusion**

363 To substantially improve our understanding of the lung flukes at the molecular level, we sequenced,  
364 assembled, annotated and compared draft genomes of four species of *Paragonimus*, three from Asia (*P.*  
365 *miyazakii*, *P. westermani* from Japan, *P. heterotremus*) and one from North America (*P. kellicotti*), thereby  
366 providing novel and valuable genomic resources across these important parasites for the first time. We have  
367 utilized these new resources to compare and analyze phylogenies, to identify gene sets and biological functions  
368 associated with parasitism in lung flukes, and to contribute a key resource for future investigation into host-  
369 parasite interactions for these poorly-understood agents of neglected tropical disease. Our identification of  
370 previously prioritized *Paragonimus* diagnostic markers in each of the four lung fluke species revealed that the same  
371 protein targets were identified in multiple studies, and hence the availability of full gene sequences now should  
372 facilitate diagnostic assays aiming for reactivity across all species of lung fluke. Overall, the novel genomic and  
373 transcriptomic resources developed here will be invaluable for research on paragonimiasis, guiding experimental  
374 design and generation of novel hypotheses.

## 376 **Methods**

### 377 Parasite specimens

378 Samples of DNA and RNA of *Paragonimus westermani* were sourced in Japan. *Paragonimus heterotremus*  
379 (LC strain, Vietnam) were recovered from a cat experimentally infected with metacercariae from Lai Chau province,  
380 northern Vietnam (70% ethanol preserved; whole worm). *Paragonimus miyazakii* metacercariae were recovered  
381 from freshwater crabs (*Geothelphusa dehaani*), collected in Shizuoka Prefecture, central Japan [15], and were raised  
382 to adulthood in rats. DNA and RNA samples were prepared for each of the (pre-)adult flukes recovered from the  
383 lungs and from the pleural and peritoneal cavities of experimentally infected rats. *Paragonimus kellicotti* adult worms  
384 for genome sequencing were recovered from the lungs of Mongolian gerbils infected in the laboratory with  
385 metacercariae recovered from Missouri crayfish [73].

## Genome sequencing, assembly and annotation

DNA and RNA samples were collected from adult-stage parasites of four distinct *Paragonimus* species: *P. miyazakii* (Japan), *P. heterotremus* (LC strain, Vietnam), *P. kellicotti* (Missouri, USA) and *Paragonimus westermani* (Japan). Illumina DNA sequencing produced fragments, 3kb- and 8kb-insert whole-genome shotgun libraries, and PacBio reads were generated for *P. kellicotti*. The sequences were generated on the Illumina platform and assembled using Allpaths\_LG [74]. Scaffolding was improved using an in-house tool called Pygap (gap closure tool), the Pyramid assembler with Illumina paired reads to close gaps and extend contigs, and L\_RNA\_scaffolder [75] which uses transcript alignments to improve contiguity. For *P. kellicotti*, PacBio reads were assembled using PBJelly [76], utilizing the Illumina allpaths assembly as the reference. Nanocorr was used to perform error correction on the PacBio data. The nuclear genomes were annotated using the MAKER pipeline v2.31.8 [77]. Repetitive elements were softmasked with RepeatMasker v4.0.6 using a species-specific repeat library created by RepeatModeler v1.0.8, RepBase repeat libraries [78], and a list of known transposable elements provided by MAKER [77]. RNA-seq reads were aligned to their respective genome assemblies and assembled using StringTie v1.2.4 [79] (*P. miyazakii* samples collected from stages in the liver, peritoneal cavity [2 replicates], lung (adult) and pleural cavity; *P. heterotremus* samples from adults and young adults [2 replicates]; *P. westermani* [72] and *P. kellicotti* [80] adult-stage transcriptomic reads were retrieved from published reports). The resulting alignments and transcript assemblies were used by BRAKER [81] and MAKER pipelines, respectively, as extrinsic evidence. In addition, mRNA and EST sequences for each species were retrieved from NCBI, and were provided to MAKER as protein homology evidence along with protein sequences from UniRef100 [82] (Trematoda-specific, n=205,161) and WormBase ParaSite WBPS7 [83]. *Ab initio* gene predictions from BRAKER v2 [81] and AUGUSTUS v3.2.2 (trained by BRAKER and run within MAKER) were refined using the transcript and protein evidence. Previously unpredicted exons and UTRs were added, and split models were merged. The best-supported gene models were chosen based on Annotation Edit Distance (AED) [84]. To reduce false positives, gene predictions without supporting evidence were excluded in the final annotation build, with the exception of those encoding Pfam domains, as detected by InterProScan v5.19 [58]. These Pfam encoding domains were rescued in order to improve the annotation accuracy overall by balancing sensitivity and specificity [77, 85]. Gene products were named using PANNZER2 [86] and sma3s v2 [87].

**Supplementary Table S1** provides details of database accessions for the genomes. The completeness of

415 annotated gene sets was assessed using BUSCO v3.0, eukaryota\_odb9 [17]. Gene Ontology (GO), KEGG and  
416 protease annotations were performed using InterProScan v5.19 [58], GhostKOALA [59], and MEROPS [88],  
417 respectively. ExPASy was used to perform protein weight and pi predictions [60], SignalP was used to predict  
418 predictions signal peptides and transmembrane domains [61], and gene product localization was predicted using  
419 the “cellular component” Gene Ontology annotations provided by InterProScan [58].

420 Functional enrichment testing was performed using GOSTATS [89] for GO enrichment and negative  
421 binomial distribution tests for InterPro domain enrichment (minimum 3 annotated genes required for significant  
422 enrichment). Ribosomal RNAs and tRNAs were annotated using RNAmmer v1.2.1 [90] and tRNAscan-SE v1.23  
423 [91], respectively. Genome characteristics and statistics including CDS, numbers and lengths of genes, exons  
424 and introns were defined using the longest complete mRNA (with start and stop codon) for each gene. Across  
425 the four species of *Paragonimus*, complete mRNAs were found for an average of 86.2% of all annotated genes.

426 Assembly of the mitochondrial genome of *P. kellicotti* was achieved using CANU [92] to align PacBio  
427 long-reads, followed by error-correction using Pilon [93].

428 MUMmer v4.0 [94] was used to estimate the level of genetic divergence between *P. westermani* samples  
429 from Japan and India. Nucmerum was run first to generate genome alignments using draft assembly sequences.  
430 Dnadiff was then used to calculate the average sequence identity between the genomes considering only 1-to-  
431 1 alignments.

#### 432 Transcriptome datasets and gene functional annotations

433 RNA-seq datasets were trimmed for adapters [95] and aligned [96] to their respective genome  
434 assemblies, and gene expression levels (FPKM) were quantified per gene per sample in each of the four species  
435 [97]. For *P. miyazakii*, differential gene expression analysis [98] identified genes significantly differentially  
436 expressed between the cavity and tissue samples. Interpro domains and Gene Ontology (GO) terms [58], KEGG  
437 enzymes [59], and protease [88] annotations of the genes were used to identify putative functions of genes of  
438 interest and perform pathway enrichment [89]. All raw RNA-Seq fastq files were uploaded to the NCBI Sequence  
439 Read Archive (SRA [99]), and complete sample metadata and accession information are provided in  
440 **Supplementary Table S1. Supplementary Table S2** provides, for each of the species, complete gene lists and  
441

442 gene expression levels for each of the RNA-Seq samples. Complete functional annotations for every gene and  
443 the differential gene expression dataset are also provided for *P. miyazakii* in this table.

#### 445 Repeat analysis

446 RepeatModeler v1.0.8 (with WU-BLAST as its search engine) was used to build, refine and classify  
447 consensus models of putative interspersed repeats for each species. With the resulting repeat libraries, genomic  
448 sequences were screened using RepeatMasker v4.0.6 in “slow search” mode to generate a detailed annotation  
449 of the interspersed and simple repeats. Per-copy distances to consensus were calculated (Kimura 2-parameter  
450 model, excluding CpG sites) and were plotted as repeat landscapes where divergence distribution reflected the  
451 activity of transposable elements (TE) on a relative time scale per genome using the calcDivergenceFromAlign.pl  
452 and createRepeatLandscape.pl scripts included in the RepeatMasker package.

#### 454 Gene family evolution

455 Orthologous groups (OG) of genes of 21 species were inferred with OrthoFinder v1.1.4 [100] using the longest  
456 isoform for each gene (*Paragonimus* genome source information in **Supplementary Table S1**; Worm gene sets  
457 were retrieved from WormBase ParaSite in June 2017 [83]; Outgroup species gene sets were retrieved from  
458 Ensembl in June 2017 [101]). CAFE method [23] was employed to model gene gain and loss while accounting  
459 for the species’ phylogenetic history based on an ultrametric species tree and the number of gene copies found  
460 in each species for each gene family. Birth-death ( $\lambda$ ) parameters were estimated and the statistical significance  
461 of the observed family size differences among taxa were assessed. Results from OrthoFinder [100] were parsed  
462 to identify the OGs of interest based on conservation, including the lung fluke-conserved, liver fluke-conserved  
463 and blood fluke-conserved OGs and gene sets per species. **Supplementary Table S4** provides details of full  
464 OG counts per species and gene membership.

465 We used PosiGene [102] to search genome-wide for genes that evolved under positive selection based  
466 on the non-synonymous to synonymous substitution ratio. TMMOD [103] and Protter [104] were used for  
467 transmembrane helical topology prediction and visualization, respectively. We searched for genes that evolved  
468 under positive selection in the four *Paragonimus* spp. based on the non-synonymous to synonymous substitution

469 rate ratio ( $d_N/d_S$ ). We conducted the branch-site test of positive selection to identify adaptive gene variants that  
470 became fixed in each species [35].

#### 472 Previously identified *Paragonimus* diagnostic antigen search

473 Nucleotide sequences (or, if unavailable, amino acid sequences) were retrieved from each of the cited  
474 publications (**Supplementary Figure S5**). Diamond blastx (nucleotides; v0.9.9.110) or Diamond blastp (amino  
475 acids; v0.9.9.110) were used to identify the top hit gene in each *Paragonimus* genome annotation (default  
476 settings). The best BLAST E-value was used to identify the top match, followed by top bitscore, length and % ID  
477 in the case of ties. For the top 25 *P. kellicotti* immunodominant antigen transcripts identified in McNulty et al,  
478 2014 [80], matches were identified between the assembled transcript and the annotated gene. For the other  
479 three species, the BLAST searches are performed against the identified *P. kellicotti* gene, and not the original  
480 transcript sequence.

#### 482 RNAseq-based gene expression profiling

483 After adapter trimming using Trimmomatic v0.36 [95], RNA-seq reads were aligned to their respective  
484 genome assemblies using the STAR aligner [96] (2-pass mode, basic). All raw RNA-Seq fastq files were  
485 uploaded to the NCBI Sequence Read Archive (SRA [99]), and complete sample metadata and accession  
486 information are provided in **Supplementary Table S1**. Read fragments (read pairs or single reads) were  
487 quantified per gene per sample using featureCounts (version 1.5.1) [97]. FPKM (fragments per kilobase of gene  
488 length per million reads mapped) normalization was also performed. For *P. miyazakii*, significantly differentially  
489 expressed genes between the cavity and tissue sample sets were identified using DESeq2 (version 1.4.5) [98]  
490 with default settings, and a minimum *P*-value significance threshold of 0.05 (after False Discovery Rate [FDR  
491 [105]] correction for the number of tests). Pearson correlation-based RNA-Seq sample clustering was performed  
492 in R (using the hclust package, complete linkage).

#### 494 Statistics

495 ANOVA analysis followed by Tukey's HSD post-hoc testing was performed to compare genome statistics  
496 and protease expression between species (**Figure 2, Supplementary Figure S3**). Because comparisons for the

497 genome statistics by *t* tests involved large numbers of values, which can falsely indicate positive statistical  
498 significance, a random selection of 100 values from each species was used (excluding the upper and lower 1%  
499 of data to avoid outliers). Letter labels above the species indicate statistical groups, i.e., if two species share the  
500 same letter then they were not statistically significant from each other.

### 503 **Availability of supporting data and materials**

504 Genomic raw reads, genome assemblies, genome annotations, and raw transcriptomic (RNA-Seq) fastq  
505 files were uploaded and are available for download from the NCBI Sequence Read Archive (SRA [99]), with all  
506 accession numbers and relevant metadata provided in **Supplementary Table S1**. **Supplementary Table S2**  
507 provides, for each of the species, complete gene lists and gene expression levels for each of the RNA-Seq  
508 samples. Complete functional annotations for every gene and the differential gene expression dataset are also  
509 provided for *P. miyazakii* in this table. All results of the genome-wide selection scan are provided in  
510 **Supplementary Table S3**. For each orthologous group identified, **Supplementary Table S4** provides complete  
511 gene lists, counts of genes per species, and average gene expression levels from each the *Paragonimus*  
512 transcriptome datasets described above. All relevant software versions, and commands specifying the  
513 parameters used are presented in **Supplementary Text S1**.

### 515 **Declarations**

#### 517 List of Abbreviations

518 FPKM - Fragments Per Kilobase of gene length per Million reads mapped (gene expression level)

519 OG - Orthologous Group

520 TE – Transposable Elements

#### 522 Consent for Publication

523 Not Applicable.

525 Competing Interests

526 The authors declare that they have no competing interests.

527

528 Funding

529 Sequencing of the genomes was supported by the ‘Sequencing the etiological agents of the Food-Borne  
530 Trematodiasis’ project (National Institutes of Health - National Human Genome Research Institute award  
531 number U54HG003079). Comparative genome analysis was funded by grants National Institutes of Health -  
532 National Institute of Allergy and Infectious Diseases AI081803 and National Institutes of Health - National  
533 Institute of General Medical Sciences GM097435 to M.M. Parasite material from Thailand was supported by  
534 Distinguished Research Professor Grant (WM), Thailand Research Fund (Grant no. DPG6280002).

535

536 Author’s Contributions

- 537 1. **Conceptualization:** MM PJB.
- 538 2. **Formal analysis:** BAR YJC SNM HJ JM.
- 539 3. **Funding acquisition:** PJB MM.
- 540 4. **Methodology:** PJB PUF DB MM.
- 541 5. **Resources:** MM TA HS TLH PND WM DB PUF.
- 542 6. **Visualization:** BAR YJC.
- 543 7. **Writing – original draft:** BAR YJC MM.
- 544 8. **Writing – review & editing:** DB PJB PUF MM.

545

546 Acknowledgements

547 We gratefully acknowledge assistance provided by Xu Zhang and Kymberlie Pepin with genome assembly and  
548 annotation and by Rahul Tyagi for figure graphics. We thank Kurt Curtis for his help generating *P. kellicotti*  
549 parasite material.

550

1. Furst T, Keiser J and Utzinger J. Global burden of human food-borne trematodiasis: a systematic review and meta-analysis. *Lancet Infect Dis.* 2012;12 3:210-21. doi:10.1016/S1473-3099(11)70294-8.
2. Utzinger J, Becker SL, Knopp S, Blum J, Neumayr AL, Keiser J, et al. Neglected tropical diseases: diagnosis, clinical management, treatment and control. *Swiss Med Wkly.* 2012;142:w13727. doi:10.4414/smw.2012.13727.
3. Blair D. Paragonimiasis. *Adv Exp Med Biol.* 2014;766:115-52. doi:10.1007/978-1-4939-0915-5\_5.
4. Furst T, Sayasone S, Odermatt P, Keiser J and Utzinger J. Manifestation, diagnosis, and management of foodborne trematodiasis. *BMJ.* 2012;344:e4093. doi:10.1136/bmj.e4093.
5. Lv S, Zhang Y, Steinmann P, Zhou XN and Utzinger J. Helminth infections of the central nervous system occurring in Southeast Asia and the Far East. *Adv Parasitol.* 2010;72:351-408. doi:S0065-308X(10)72012-1 [pii] 10.1016/S0065-308X(10)72012-1.
6. Sripa B, Kaewkes S, Intapan PM, Maleewong W and Brindley PJ. Food-borne trematodiasis in Southeast Asia epidemiology, pathology, clinical manifestation and control. *Adv Parasitol.* 2010;72:305-50. doi:S0065-308X(10)72011-X [pii] 10.1016/S0065-308X(10)72011-X.
7. Liu Q, Wei F, Liu W, Yang S and Zhang X. Paragonimiasis: an important food-borne zoonosis in China. *Trends Parasitol.* 2008;24 7:318-23. doi:S1471-4922(08)00137-2 [pii] 10.1016/j.pt.2008.03.014.
8. Blair D, Xu ZB and Agatsuma T. Paragonimiasis and the genus *Paragonimus*. *Adv Parasitol.* 1999;42:113-222.
9. Blair D, Davis GM and Wu B. Evolutionary relationships between trematodes and snails emphasizing schistosomes and paragonimids. *Parasitology.* 2001;123:S229-S43. doi:Doi 10.1017/S003118200100837x.
10. Attwood SW, Upatham ES, Meng XH, Qiu DC and Southgate VR. The phylogeography of Asian *Schistosoma* (Trematoda: Schistosomatidae). *Parasitology.* 2002;125 Pt 2:99-112. doi:10.1017/s0031182002001981.
11. Doanh NP, Tu AL, Bui TD, Loan TH, Nonaka N, Horii Y, et al. Molecular and morphological variation of *Paragonimus westermani* in Vietnam with records of new second intermediate crab hosts and a new locality in a northern province. *Parasitology.* 2016;143 12:1639-46. doi:10.1017/S0031182016001219.
12. Oey H, Zakrzewski M, Narain K, Devi KR, Agatsuma T, Nawaratna S, et al. Whole-genome sequence of the oriental lung fluke *Paragonimus westermani*. *Gigascience.* 2019;8 1 doi:10.1093/gigascience/giy146.
13. Blair D, Chang Z, Chen M, Cui A, Wu B, Agatsuma T, et al. *Paragonimus skrjabini* Chen, 1959 (Digenea: Paragonimidae) and related species in eastern Asia: a combined molecular and morphological approach to identification and taxonomy. *Syst Parasitol.* 2005;60 1:1-21. doi:10.1007/s11230-004-1378-5.
14. Lane MA, Marcos LA, Onen NF, Demertzis LM, Hayes EV, Davila SZ, et al. *Paragonimus kellicotti* flukes in Missouri, USA. *Emerg Infect Dis.* 2012;18 8:1263-7. doi:10.3201/eid1808.120335.
15. Fischer PU and Weil GJ. North American paragonimiasis: epidemiology and diagnostic strategies. *Expert Rev Anti-Infe.* 2015;13 6:779-86. doi:10.1586/14787210.2015.1031745.
16. Blair D, Nawa Y, Mitreva M and Doanh PN. Gene diversity and genetic variation in lung flukes (genus *Paragonimus*). *Trans R Soc Trop Med Hyg.* 2016;110 1:6-12. doi:10.1093/trstmh/trv101.
17. Waterhouse RM, Seppey M, Simao FA, Manni M, Ioannidis P, Klioutchnikov G, et al. BUSCO applications from quality assessments to gene prediction and phylogenomics. *Mol Biol Evol.* 2017; doi:10.1093/molbev/msx319.
18. Choi YJ, Fontenla S, Fischer PU, Le TH, Costabile A, Blair D, et al. Adaptive Radiation of the Flukes of the Family Fasciolidae Inferred from Genome-Wide Comparisons of Key Species. *Mol Biol Evol.* 2020;37 1:84-99. doi:10.1093/molbev/msz204.
19. Stapley J, Santure AW and Dennis SR. Transposable elements as agents of rapid adaptation may explain the genetic paradox of invasive species. *Mol Ecol.* 2015;24 9:2241-52. doi:10.1111/mec.13089.
20. Schrader L and Schmitz J. The impact of transposable elements in adaptive evolution. *Mol Ecol.* 2018; doi:10.1111/mec.14794.



- 603 21. Chenais B, Caruso A, Hiard S and Casse N. The impact of transposable elements on eukaryotic  
604 genomes: from genome size increase to genetic adaptation to stressful environments. *Gene*. 2012;509  
605 1:7-15. doi:10.1016/j.gene.2012.07.042.
- 606 22. Prasad PK, Tandon V, Biswal DK, Goswami LM and Chatterjee A. Phylogenetic reconstruction using  
607 secondary structures and sequence motifs of ITS2 rDNA of *Paragonimus westermani* (Kerbert, 1878)  
608 Braun, 1899 (Digenea: Paragonimidae) and related species. *BMC Genomics*. 2009;10 Suppl 3:S25.  
609 doi:10.1186/1471-2164-10-S3-S25.
- 610 23. Han MV, Thomas GW, Lugo-Martinez J and Hahn MW. Estimating gene gain and loss rates in the  
611 presence of error in genome assembly and annotation using CAFE 3. *Mol Biol Evol*. 2013;30 8:1987-  
612 97. doi:10.1093/molbev/mst100.
- 613 24. Ahn CS, Na BK, Chung DL, Kim JG, Kim JT and Kong Y. Expression characteristics and specific  
614 antibody reactivity of diverse cathepsin F members of *Paragonimus westermani*. *Parasitol Int*. 2015;64  
615 1:37-42. doi:10.1016/j.parint.2014.09.012.
- 616 25. McNulty SN, Tort JF, Rinaldi G, Fischer K, Rosa BA, Smircich P, et al. Genomes of *Fasciola hepatica*  
617 from the Americas Reveal Colonization with Neorickettsia Endobacteria Related to the Agents of  
618 Potomac Horse and Human Sennetsu Fevers. *PLoS Genet*. 2017;13 1:e1006537.  
619 doi:10.1371/journal.pgen.1006537.
- 620 26. Jones MK, Gobert GN, Zhang L, Sunderland P and McManus DP. The cytoskeleton and motor proteins  
621 of human schistosomes and their roles in surface maintenance and host-parasite interactions.  
622 *Bioessays*. 2004;26 7:752-65. doi:10.1002/bies.20058.
- 623 27. Mathieson W and Wilson RA. A comparative proteomic study of the undeveloped and developed  
624 *Schistosoma mansoni* egg and its contents: the miracidium, hatch fluid and secretions. *Int J Parasitol*.  
625 2010;40 5:617-28. doi:10.1016/j.ijpara.2009.10.014.
- 626 28. Sotillo J, Pearson M, Becker L, Mulvenna J and Loukas A. A quantitative proteomic analysis of the  
627 tegumental proteins from *Schistosoma mansoni* schistosomula reveals novel potential therapeutic  
628 targets. *Int J Parasitol*. 2015;45 8:505-16. doi:10.1016/j.ijpara.2015.03.004.
- 629 29. Liu F, Cui SJ, Hu W, Feng Z, Wang ZQ and Han ZG. Excretory/secretory proteome of the adult  
630 developmental stage of human blood fluke, *Schistosoma japonicum*. *Mol Cell Proteomics*. 2009;8  
631 6:1236-51. doi:10.1074/mcp.M800538-MCP200.
- 632 30. Kolinski T, Marek-Trzonkowska N, Trzonkowski P and Siebert J. Heat shock proteins (HSPs) in the  
633 homeostasis of regulatory T cells (Tregs). *Cent Eur J Immunol*. 2016;41 3:317-23.  
634 doi:10.5114/ceji.2016.63133.
- 635 31. Pereira AS, Cavalcanti MG, Zingali RB, Lima-Filho JL and Chaves ME. Isoforms of Hsp70-binding  
636 human LDL in adult *Schistosoma mansoni* worms. *Parasitol Res*. 2015;114 3:1145-52.  
637 doi:10.1007/s00436-014-4292-z.
- 638 32. He S, Yang L, Lv Z, Hu W, Cao J, Wei J, et al. Molecular and functional characterization of a mortalin-  
639 like protein from *Schistosoma japonicum* (SjMLP/hsp70) as a member of the HSP70 family. *Parasitol*  
640 *Res*. 2010;107 4:955-66. doi:10.1007/s00436-010-1960-5.
- 641 33. Reis EV, Pereira RV, Gomes M, Jannotti-Passos LK, Baba EH, Coelho PM, et al. Characterisation of  
642 major vault protein during the life cycle of the human parasite *Schistosoma mansoni*. *Parasitol Int*.  
643 2014;63 1:120-6. doi:10.1016/j.parint.2013.10.005.
- 644 34. Messerli SM, Kasinathan RS, Morgan W, Spranger S and Greenberg RM. *Schistosoma mansoni* P-  
645 glycoprotein levels increase in response to praziquantel exposure and correlate with reduced  
646 praziquantel susceptibility. *Mol Biochem Parasitol*. 2009;167 1:54-9.  
647 doi:10.1016/j.molbiopara.2009.04.007.
- 648 35. Yang Z. PAML 4: phylogenetic analysis by maximum likelihood. *Mol Biol Evol*. 2007;24 8:1586-91.  
649 doi:10.1093/molbev/msm088.
- 650 36. Huang S, Yuan S, Dong M, Su J, Yu C, Shen Y, et al. The phylogenetic analysis of tetraspanins  
651 projects the evolution of cell-cell interactions from unicellular to multicellular organisms. *Genomics*.  
652 2005;86 6:674-84. doi:10.1016/j.ygeno.2005.08.004.
- 653 37. Chaiyadet S, Krueajampa W, Hipkaeo W, Plosan Y, Piratae S, Sotillo J, et al. Suppression of mRNAs  
654 encoding CD63 family tetraspanins from the carcinogenic liver fluke *Opisthorchis viverrini* results in  
655 distinct tegument phenotypes. *Sci Rep*. 2017;7 1:14342. doi:10.1038/s41598-017-13527-5.
- 656 38. Krautz-Peterson G, Debatis M, Tremblay JM, Oliveira SC, Da'dara AA, Skelly PJ, et al. *Schistosoma*  
657 *mansoni* Infection of Mice, Rats and Humans Elicits a Strong Antibody Response to a Limited Number

- 658 of Reduction-Sensitive Epitopes on Five Major Tegumental Membrane Proteins. *PLoS Negl Trop Dis*.  
659 2017;11 1:e0005306. doi:10.1371/journal.pntd.0005306.
- 660 39. Tran MH, Pearson MS, Bethony JM, Smyth DJ, Jones MK, Duke M, et al. Tetraspanins on the surface  
661 of *Schistosoma mansoni* are protective antigens against schistosomiasis. *Nat Med*. 2006;12 7:835-40.  
662 doi:10.1038/nm1430.
- 663 40. Wu C, Cai P, Chang Q, Hao L, Peng S, Sun X, et al. Mapping the binding between the tetraspanin  
664 molecule (Sjc23) of *Schistosoma japonicum* and human non-immune IgG. *PLoS One*. 2011;6  
665 4:e19112. doi:10.1371/journal.pone.0019112.
- 666 41. Sealey KL, Kirk RS, Walker AJ, Rollinson D and Lawton SP. Adaptive radiation within the vaccine  
667 target tetraspanin-23 across nine *Schistosoma* species from Africa. *Int J Parasitol*. 2013;43 1:95-103.  
668 doi:10.1016/j.ijpara.2012.11.007.
- 669 42. Yang Y, Wen Y, Cai YN, Vallee I, Boireau P, Liu MY, et al. Serine proteases of parasitic helminths.  
670 *Korean J Parasitol*. 2015;53 1:1-11. doi:10.3347/kjp.2015.53.1.1.
- 671 43. Glanfield A, McManus DP, Anderson GJ and Jones MK. Pumping iron: a potential target for novel  
672 therapeutics against schistosomes. *Trends Parasitol*. 2007;23 12:583-8. doi:10.1016/j.pt.2007.08.018.
- 673 44. Brindley PJ, Kalinna BH, Wong JY, Bogitsh BJ, King LT, Smyth DJ, et al. Proteolysis of human  
674 hemoglobin by schistosome cathepsin D. *Mol Biochem Parasitol*. 2001;112 1:103-12.
- 675 45. Williamson AL, Brindley PJ, Abbenante G, Prociv P, Berry C, Girdwood K, et al. Cleavage of  
676 hemoglobin by hookworm cathepsin D aspartic proteases and its potential contribution to host  
677 specificity. *FASEB J*. 2002;16 11:1458-60. doi:10.1096/fj.02-0181fje.
- 678 46. Lee EG, Na BK, Bae YA, Kim SH, Je EY, Ju JW, et al. Identification of immunodominant excretory-  
679 secretory cysteine proteases of adult *Paragonimus westermani* by proteome analysis. *Proteomics*.  
680 2006;6 4:1290-300. doi:10.1002/pmic.200500399.
- 681 47. Na BK, Kim SH, Lee EG, Kim TS, Bae YA, Kang I, et al. Critical roles for excretory-secretory cysteine  
682 proteases during tissue invasion of *Paragonimus westermani* newly excysted metacercariae. *Cell*  
683 *Microbiol*. 2006;8 6:1034-46. doi:10.1111/j.1462-5822.2006.00685.x.
- 684 48. Caban-Hernandez K and Espino AM. Differential expression and localization of saposin-like protein 2 of  
685 *Fasciola hepatica*. *Acta Trop*. 2013;128 3:591-7. doi:10.1016/j.actatropica.2013.08.012.
- 686 49. Basavaraju SV, Zhan B, Kennedy MW, Liu Y, Hawdon J and Hotez PJ. Ac-FAR-1, a 20 kDa fatty acid-  
687 and retinol-binding protein secreted by adult *Ancylostoma caninum* hookworms: gene transcription  
688 pattern, ligand binding properties and structural characterisation. *Mol Biochem Parasitol*. 2003;126  
689 1:63-71.
- 690 50. Jones MK, McManus DP, Sivadorai P, Glanfield A, Moertel L, Belli SI, et al. Tracking the fate of iron in  
691 early development of human blood flukes. *Int J Biochem Cell Biol*. 2007;39 9:1646-58.  
692 doi:10.1016/j.biocel.2007.04.017.
- 693 51. Grote A, Caffrey CR, Rebello KM, Smith D, Dalton JP and Lustigman S. Cysteine proteases during  
694 larval migration and development of helminths in their final host. *PLoS Negl Trop Dis*. 2018;12  
695 8:e0005919. doi:10.1371/journal.pntd.0005919.
- 696 52. Taylor AB, Roberts KM, Cao X, Clark NE, Holloway SP, Donati E, et al. Structural and Enzymatic  
697 Insights into Species-specific Resistance to Schistosome Parasite Drug Therapy. 2017;  
698 doi:10.1074/jbc.M116.766527.
- 699 53. Pao SS, Paulsen IT and Saier MH, Jr. Major facilitator superfamily. *Microbiol Mol Biol Rev*. 1998;62  
700 1:1-34.
- 701 54. World Health Organization. 2019. Accessed August 25, 2019.
- 702 55. Kyung SY, Cho YK, Kim YJ, Park JW, Jeong SH, Lee JI, et al. A paragonimiasis patient with allergic  
703 reaction to praziquantel and resistance to triclabendazole: successful treatment after desensitization to  
704 praziquantel. *Korean J Parasitol*. 2011;49 1:73-7. doi:10.3347/kjp.2011.49.1.73.
- 705 56. Kelley JM, Elliott TP, Beddoe T, Anderson G, Skuce P and Spithill TW. Current Threat of  
706 Triclabendazole Resistance in *Fasciola hepatica*. *Trends Parasitol*. 2016; doi:10.1016/j.pt.2016.03.002.
- 707 57. Mader P, Rennar GA, Ventura AMP, Grevelding CG and Schlitzer M. Chemotherapy for Fighting  
708 Schistosomiasis: Past, Present and Future. *ChemMedChem*. 2018;13 22:2374-89.  
709 doi:10.1002/cmdc.201800572.
- 710 58. Jones P, Binns D, Chang HY, Fraser M, Li W, McAnulla C, et al. InterProScan 5: genome-scale protein  
711 function classification. *Bioinformatics*. 2014;30 9:1236-40. doi:10.1093/bioinformatics/btu031 [pii].

- 712 59. Kanehisa M, Sato Y and Morishima K. BlastKOALA and GhostKOALA: KEGG Tools for Functional  
713 Characterization of Genome and Metagenome Sequences. *J Mol Biol.* 2016;428 4:726-31.  
714 doi:10.1016/j.jmb.2015.11.006.
- 715 60. Artimo P, Jonnalagedda M, Arnold K, Baratin D, Csardi G, de Castro E, et al. ExPASy: SIB  
716 bioinformatics resource portal. *Nucleic Acids Res.* 2012;40 Web Server issue:W597-603.  
717 doi:10.1093/nar/gks400.
- 718 61. Almagro Armenteros JJ, Tsirigos KD, Sonderby CK, Petersen TN, Winther O, Brunak S, et al. SignalP  
719 5.0 improves signal peptide predictions using deep neural networks. *Nat Biotechnol.* 2019;37 4:420-3.  
720 doi:10.1038/s41587-019-0036-z.
- 721 62. Mendez D, Gaulton A, Bento AP, Chambers J, De Veij M, Félix E, et al. ChEMBL: towards direct  
722 deposition of bioassay data. *Nucleic Acids Res.* 2019;47 D1:D930-D40. doi:10.1093/nar/gky1075.
- 723 63. Stutzer C, Richards SA, Ferreira M, Baron S and Maritz-Olivier C. Metazoan Parasite Vaccines:  
724 Present Status and Future Prospects. *Front Cell Infect Microbiol.* 2018;8:67.  
725 doi:10.3389/fcimb.2018.00067.
- 726 64. Radzikowska E, Chabowski M and Bestry I. Tuberculosis mimicry. *Eur Respir J.* 2006;27 3:652; author  
727 reply doi:10.1183/09031936.06.00121205.
- 728 65. Eapen S, Espinal E and Firstenberg M. Delayed diagnosis of paragonimiasis in Southeast Asian  
729 immigrants: A need for global awareness. 2018;4 2:173-7. doi:10.4103/ijam.ljam\_2\_18.
- 730 66. Yang SH, Park JO, Lee JH, Jeon BH, Kim WS, Kim SI, et al. Cloning and characterization of a new  
731 cysteine proteinase secreted by *Paragonimus westermani* adult worms. *Am J Trop Med Hyg.* 2004;71  
732 1:87-92.
- 733 67. Yoonuan T, Nuamtanong S, Dekumyoy P, Phuphisut O and Adisakwattana P. Molecular and  
734 immunological characterization of cathepsin L-like cysteine protease of *Paragonimus*  
735 *pseudoheterotremus*. *Parasitol Res.* 2016;115 12:4457-70. doi:10.1007/s00436-016-5232-x.
- 736 68. Kim SH and Bae YA. Lineage-specific expansion and loss of tyrosinase genes across platyhelminths  
737 and their induction profiles in the carcinogenic oriental liver fluke, *Clonorchis sinensis*. *Parasitology.*  
738 2017;144 10:1316-27. doi:10.1017/S003118201700083X.
- 739 69. Bae YA, Kim SH, Ahn CS, Kim JG and Kong Y. Molecular and biochemical characterization of  
740 *Paragonimus westermani* tyrosinase. *Parasitology.* 2015;142 6:807-15.  
741 doi:10.1017/S0031182014001942.
- 742 70. Pothong K, Komalamisra C, Kalambaheti T, Watthanakulpanich D, Yoshino TP and Dekumyoy P.  
743 ELISA based on a recombinant *Paragonimus heterotremus* protein for serodiagnosis of human  
744 paragonimiasis in Thailand. *Parasit Vectors.* 2018;11 1:322. doi:10.1186/s13071-018-2878-5.
- 745 71. Bae YA, Kim SH, Cai GB, Lee EG, Kim TS, Agatsuma T, et al. Differential expression of *Paragonimus*  
746 *westermani* eggshell proteins during the developmental stages. *Int J Parasitol.* 2007;37 3-4:295-305.  
747 doi:10.1016/j.ijpara.2006.10.006.
- 748 72. Li BW, McNulty SN, Rosa BA, Tyagi R, Zeng QR, Gu KZ, et al. Conservation and diversification of the  
749 transcriptomes of adult *Paragonimus westermani* and *P. skrjabini*. *Parasit Vectors.* 2016;9:497.  
750 doi:10.1186/s13071-016-1785-x.
- 751 73. Fischer PU, Curtis KC, Marcos LA and Weil GJ. Molecular characterization of the North American lung  
752 fluke *Paragonimus kellicotti* in Missouri and its development in Mongolian gerbils. *Am J Trop Med Hyg.*  
753 2011;84 6:1005-11. doi:10.4269/ajtmh.2011.11-0027.
- 754 74. Gnerre S, Maccallum I, Przybylski D, Ribeiro FJ, Burton JN, Walker BJ, et al. High-quality draft  
755 assemblies of mammalian genomes from massively parallel sequence data. *Proc Natl Acad Sci U S A.*  
756 2011;108 4:1513-8. doi:10.1073/pnas.1017351108.
- 757 75. Xue W, Li JT, Zhu YP, Hou GY, Kong XF, Kuang YY, et al. L\_RNA\_scaffolder: scaffolding genomes  
758 with transcripts. *BMC Genomics.* 2013;14:604. doi:10.1186/1471-2164-14-604.
- 759 76. English AC, Richards S, Han Y, Wang M, Vee V, Qu J, et al. Mind the gap: upgrading genomes with  
760 Pacific Biosciences RS long-read sequencing technology. *PLoS One.* 2012;7 11:e47768.  
761 doi:10.1371/journal.pone.0047768.
- 762 77. Holt C and Yandell M. MAKER2: an annotation pipeline and genome-database management tool for  
763 second-generation genome projects. *BMC Bioinformatics.* 2011;12:491. doi:10.1186/1471-2105-12-  
764 491.
- 765 78. Bao W, Kojima KK and Kohany O. Repbase Update, a database of repetitive elements in eukaryotic  
766 genomes. *Mob DNA.* 2015;6:11. doi:10.1186/s13100-015-0041-9.

- 767 79. Perteua M, Perteua GM, Antonescu CM, Chang TC, Mendell JT and Salzberg SL. StringTie enables  
768 improved reconstruction of a transcriptome from RNA-seq reads. *Nat Biotechnol.* 2015;33 3:290-5.  
769 doi:10.1038/nbt.3122.
- 770 80. McNulty SN, Fischer PU, Townsend RR, Curtis KC, Weil GJ and Mitreva M. Systems biology studies of  
771 adult paragonimus lung flukes facilitate the identification of immunodominant parasite antigens. *PLoS*  
772 *Negl Trop Dis.* 2014;8 10:e3242. doi:10.1371/journal.pntd.0003242.
- 773 81. Hoff KJ, Lange S, Lomsadze A, Borodovsky M and Stanke M. BRAKER1: Unsupervised RNA-Seq-  
774 Based Genome Annotation with GeneMark-ET and AUGUSTUS. *Bioinformatics.* 2016;32 5:767-9.  
775 doi:10.1093/bioinformatics/btv661.
- 776 82. The UniProt C. UniProt: the universal protein knowledgebase. *Nucleic Acids Res.* 2017;45 D1:D158-  
777 D69. doi:10.1093/nar/gkw1099.
- 778 83. Howe KL, Bolt BJ, Shafie M, Kersey P and Berriman M. WormBase ParaSite - a comprehensive  
779 resource for helminth genomics. *Mol Biochem Parasitol.* 2017;215:2-10.  
780 doi:10.1016/j.molbiopara.2016.11.005.
- 781 84. Eilbeck K, Moore B, Holt C and Yandell M. Quantitative measures for the management and comparison  
782 of annotated genomes. *BMC Bioinformatics.* 2009;10:67. doi:10.1186/1471-2105-10-67.
- 783 85. Campbell MS, Law M, Holt C, Stein JC, Moghe GD, Hufnagel DE, et al. MAKER-P: a tool kit for the  
784 rapid creation, management, and quality control of plant genome annotations. *Plant Physiol.* 2014;164  
785 2:513-24. doi:10.1104/pp.113.230144.
- 786 86. Koskinen P, Toronen P, Nokso-Koivisto J and Holm L. PANNZER: high-throughput functional  
787 annotation of uncharacterized proteins in an error-prone environment. *Bioinformatics.* 2015;31 10:1544-  
788 52. doi:10.1093/bioinformatics/btu851.
- 789 87. Casimiro-Soriguer CS, Munoz-Merida A and Perez-Pulido AJ. Sma3s: A universal tool for easy  
790 functional annotation of proteomes and transcriptomes. *Proteomics.* 2017;17 12  
791 doi:10.1002/pmic.201700071.
- 792 88. Rawlings ND, Barrett AJ and Finn R. Twenty years of the MEROPS database of proteolytic enzymes,  
793 their substrates and inhibitors. *Nucleic Acids Res.* 2016;44 D1:D343-50. doi:10.1093/nar/gkv1118.
- 794 89. Falcon S and Gentleman R. Using GOstats to test gene lists for GO term association. *Bioinformatics.*  
795 2007;23 2:257-8. doi:10.1093/bioinformatics/btl567.
- 796 90. Lagesen K, Hallin P, Rodland EA, Staerfeldt HH, Rognes T and Ussery DW. RNAmmer: consistent and  
797 rapid annotation of ribosomal RNA genes. *Nucleic Acids Res.* 2007;35 9:3100-8.  
798 doi:10.1093/nar/gkm160.
- 799 91. Lowe TM and Eddy SR. tRNAscan-SE: a program for improved detection of transfer RNA genes in  
800 genomic sequence. *Nucleic Acids Res.* 1997;25 5:955-64.
- 801 92. Koren S, Walenz BP, Berlin K, Miller JR, Bergman NH and Phillippy AM. Canu: scalable and accurate  
802 long-read assembly via adaptive k-mer weighting and repeat separation. *Genome Res.* 2017;27 5:722-  
803 36. doi:10.1101/gr.215087.116.
- 804 93. Walker BJ, Abeel T, Shea T, Priest M, Abouelliel A, Sakthikumar S, et al. Pilon: an integrated tool for  
805 comprehensive microbial variant detection and genome assembly improvement. *PLoS One.* 2014;9  
806 11:e112963. doi:10.1371/journal.pone.0112963.
- 807 94. Marcais G, Delcher AL, Phillippy AM, Coston R, Salzberg SL and Zimin A. MUMmer4: A fast and  
808 versatile genome alignment system. *PLoS Comput Biol.* 2018;14 1:e1005944.  
809 doi:10.1371/journal.pcbi.1005944.
- 810 95. Bolger AM, Lohse M and Usadel B. Trimmomatic: a flexible trimmer for Illumina sequence data.  
811 *Bioinformatics.* 2014;30 15:2114-20. doi:10.1093/bioinformatics/btu170.
- 812 96. Dobin A, Davis CA, Schlesinger F, Drenkow J, Zaleski C, Jha S, et al. STAR: ultrafast universal RNA-  
813 seq aligner. *Bioinformatics.* 2013;29 1:15-21. doi:10.1093/bioinformatics/bts635.
- 814 97. Liao Y, Smyth GK and Shi W. featureCounts: an efficient general purpose program for assigning  
815 sequence reads to genomic features. *Bioinformatics.* 2014;30 7:923-30.  
816 doi:10.1093/bioinformatics/btt656.
- 817 98. Anders S and Huber W. Differential expression analysis for sequence count data. *Genome Biol.*  
818 2010;11 10:R106. doi:10.1186/gb-2010-11-10-r106.
- 819 99. Leinonen R, Sugawara H, Shumway M and on behalf of the International Nucleotide Sequence  
820 Database C. The Sequence Read Archive. *Nucleic Acids Res.* 2011;39 Database issue:D19-D21.  
821 doi:10.1093/nar/gkq1019.

822 100. Emms DM and Kelly S. OrthoFinder: solving fundamental biases in whole genome comparisons  
823 dramatically improves orthogroup inference accuracy. *Genome Biol.* 2015;16:157. doi:10.1186/s13059-  
824 015-0721-2.

825 101. Zerbino DR, Achuthan P, Akanni W, Amode MR, Barrell D, Bhai J, et al. Ensembl 2018. *Nucleic Acids*  
826 *Res.* 2018;46 D1:D754-D61. doi:10.1093/nar/gkx1098.

827 102. Sahm A, Bens M, Platzer M and Szafranski K. PosiGene: automated and easy-to-use pipeline for  
828 genome-wide detection of positively selected genes. *Nucleic Acids Res.* 2017;45 11:e100.  
829 doi:10.1093/nar/gkx179.

830 103. Kahsay RY, Gao G and Liao L. An improved hidden Markov model for transmembrane protein  
831 detection and topology prediction and its applications to complete genomes. *Bioinformatics.* 2005;21  
832 9:1853-8. doi:10.1093/bioinformatics/bti303.

833 104. Omasits U, Ahrens CH, Muller S and Wollscheid B. Protter: interactive protein feature visualization and  
834 integration with experimental proteomic data. *Bioinformatics.* 2014;30 6:884-6.  
835 doi:10.1093/bioinformatics/btt607.

836 105. Benjamini Y and Hochberg Y. Controlling the False Discovery Rate: A Practical and Powerful Approach  
837 to Multiple Testing. *Journal of the Royal Statistical Society Series B (Methodological).* 1995;57 1:289-  
838 300. doi:10.2307/2346101.

839

840

841 **Figure Captions**

842

843 **Figure 1.** Comparisons of the overall content of the assembled *Paragonimus* genome assemblies. Comparisons  
844 are based on **(A)** length (including statistics for other sequenced trematode genomes) and **(B)** Repeat  
845 landscapes, measured using the Kimura substitution level, which indicates how much a repeat sequence has  
846 degenerated since its incorporation into the genome (i.e., how recently the repeat sequence was added). The  
847 high peak at the far left of *P. kellicotti* indicates a recent incorporation or active transposable element activity.

848

849 **Figure 2:** Comparison of genome annotation characteristics and attributes among several species of flatworms.  
850 Attributes characterized included **(A)** Full gene lengths, including coding and noncoding sequences, **(B)** Average  
851 intron lengths per gene, **(C)** Number of exons per gene, and **(D)** Coding sequence (CDS) length per exon. *P*  
852 values and letter groupings indicating significant differences among species, as calculated using ANOVA with  
853 Tukey's HSD post-hoc test.

854

855 **Figure 3.** Clustering of *Paragonimus* species. **(A)** Mitochondrial whole genome-based phylogeny, including  
856 previously-sequenced *Paragonimus* mitochondrial genomes (with accessions indicated). **(B)** Species clustering  
857 based on single-member OPF sequences. 262,720 genes (85% of all genes across the species) were assigned  
858 to 17,953 OPFs; 2,493 genes are in 326 species-specific OPFs.

859

860 **Figure 4.** Gene-family dynamics among platyhelminth species. **(A)** Rapidly evolving families of interest are  
861 quantified at each stage of the phylogeny, including genes gained (blue) and lost (red) relative to other species.  
862 The number of rapidly evolving genes are indicated in parentheses. **(B)** Functionally annotated gene families of  
863 interest that displayed most pronounced differential expansions or contractions. **(C)** Overall protease and  
864 protease inhibitor abundance per species.

865

866 **Figure 5.** Orthologous Group (OG) distribution analysis. **(A)** OGs identified among groups of flukes. The OGs  
867 conserved in at least one of the species from each group are indicated in black, and the OGs conserved among  
868 all the species in the overlapping groups are indicated in red. **(B)** Counts of OGs among the four *Paragonimus*

869 species, with *Paragonimus*-specific gene sets indicated in red text. The 256 *Paragonimus* conserved-and-  
870 specific genes are indicated with highlight (Table 4). **(C)** Significant functional enrichment (Interpro domains)  
871 among the gene sets conserved among, and specific to, each major group of flukes (256, 758 and 270 OPFs in  
872 lung, liver and blood flukes, respectively), relative to the functions in the complete gene sets.

873  
874 **Figure 6:** Analysis of gene expression data for species of lung flukes of the genus *Paragonimus*. **(A)** Comparison  
875 of adult-stage gene expression levels among 1:1 orthologs shared by *P. westermani* and *P. miyazakii*. Pearson  
876 correlation = 0.79. **(B)** Pearson correlation values between all lung fluke species for the adult-stage expression  
877 levels of all 1:1 orthologous genes. **(C)** Differential gene expression between cavities (blue) and tissues (orange)  
878 in *P. miyazakii*. Clustering based on FPKM value across all genes is indicated in the bottom right (Pearson  
879 clustering, complete linkage). **(D)** A comparison of the average relative expression of the lung fluke-specific and  
880 -conserved genes in each *P. miyazakii* tissue type. \*\* P < 0.01, \*\*\* P < 0.001, according to an ANOVA test of all  
881 Z-score values.

897 **Table 1:** The draft genome of *Paragonimus*: assembly, size and annotation characteristics

| Statistic                                            | <i>Paragonimus miyazakii</i> | <i>Paragonimus heterotremus</i> | <i>Paragonimus kelicotti</i> | <i>Paragonimus westermani</i> (Japan) | <i>Paragonimus westermani</i> (India) |
|------------------------------------------------------|------------------------------|---------------------------------|------------------------------|---------------------------------------|---------------------------------------|
| <b>Assembly statistics</b>                           |                              |                                 |                              |                                       |                                       |
| Total genome length (Mb)                             | 915.8                        | 841.2                           | 696.5                        | 923.3                                 | 922.8                                 |
| Number of contigs                                    | 22,318                       | 27,557                          | 29,377                       | 22,477                                | 30,455                                |
| Mean contig size (kb)                                | 41                           | 30.5                            | 23.7                         | 41.1                                  | 30.3                                  |
| Median contig size (kb)                              | 15.1                         | 9.3                             | 10.2                         | 17.2                                  | 4.8                                   |
| Max. contig size (kb)                                | 919.8                        | 715.6                           | 826                          | 829                                   | 809.4                                 |
| N50 length (kb)                                      | 108.8                        | 92.5                            | 56.0                         | 100.8                                 | 135.2                                 |
| N50 number                                           | 2,320                        | 2,506                           | 3,316                        | 2,664                                 | 1,943                                 |
| <b>BUSCO completeness (303 genes, eukarota_odb9)</b> |                              |                                 |                              |                                       |                                       |
| Complete, single copy                                | 84.5%                        | 82.5%                           | 70.3%                        | 88.78%                                | 76.90%                                |
| Complete, duplicated                                 | 1.3%                         | 0.0%                            | 1.3%                         | 1.32%                                 | 2.31%                                 |
| Fragmented                                           | 7.6%                         | 10.9%                           | 15.2%                        | 6.27%                                 | 14.85%                                |
| Missing                                              | 6.6%                         | 6.6%                            | 13.2%                        | 3.63%                                 | 5.94%                                 |
| Overall completeness                                 | 93.4%                        | 93.4%                           | 86.8%                        | 96.37%                                | 94.06%                                |
| <b>Gene statistics</b>                               |                              |                                 |                              |                                       |                                       |
| Number of genes                                      | 12,652                       | 12,490                          | 12,853                       | 12,072                                | 12,771                                |
| Avg gene length (kb)                                 | 25.9                         | 22.6                            | 17.6                         | 24.1                                  | 18.0                                  |
| Avg CDS length (kb)                                  | 1.5                          | 1.4                             | 1.1                          | 1.4                                   | 1.4                                   |
| Avg intron length (kb)                               | 4.2                          | 4                               | 3.6                          | 4.2                                   | 4.0                                   |
| Avg # exons per gene                                 | 6.7                          | 6.2                             | 5.3                          | 6.3                                   | 5.2                                   |
| % annotated InterPro                                 | 82%                          | 85%                             | 81%                          | 87%                                   | 82%                                   |
| % annotated KEGG                                     | 40%                          | 41%                             | 34%                          | 43%                                   | 43%                                   |



901

**Table 2.** "Molecular Function" Gene Ontology terms enriched among *P. miyazakii* genes that are conserved among and exclusive to lung flukes.

| GO ID      | GO term name                                        | P value | # Conserved and Specific | Total # in genome |
|------------|-----------------------------------------------------|---------|--------------------------|-------------------|
| GO:0004175 | endopeptidase activity                              | 5.2E-05 | 8                        | 132               |
| GO:0008236 | serine-type peptidase activity                      | 5.6E-05 | 6                        | 67                |
| GO:0017171 | serine hydrolase activity                           | 5.6E-05 | 6                        | 67                |
| GO:0004252 | serine-type endopeptidase activity                  | 1.6E-04 | 5                        | 51                |
| GO:0070011 | peptidase activity, acting on L-amino acid peptides | 6.1E-04 | 9                        | 237               |
| GO:0008233 | peptidase activity                                  | 8.7E-04 | 9                        | 249               |
| GO:0004568 | chitinase activity                                  | 2.1E-03 | 2                        | 7                 |
| GO:0004190 | aspartic-type endopeptidase activity                | 1.1E-02 | 2                        | 16                |
| GO:0070001 | aspartic-type peptidase activity                    | 1.1E-02 | 2                        | 16                |
| GO:0008199 | ferric iron binding                                 | 1.1E-02 | 2                        | 16                |

902

903

904

905

906  
907  
908**Table 3.** "Molecular Function" Gene Ontology terms enriched among the 216 *P. miyazakii* genes that are overexpressed in cavities (peritoneal, pleural) relative to tissues (lung, liver), and among the 172 overexpressed in tissues relative to cavities.

| Sample group | GO term    | Term                                                        | FDR-corrected P value | Number of genes over-expressed |
|--------------|------------|-------------------------------------------------------------|-----------------------|--------------------------------|
| Cavities     | GO:0008234 | cysteine-type peptidase activity                            | 1.0E-05               | 8                              |
|              | GO:0005509 | calcium ion binding                                         | 1.1E-05               | 13                             |
|              | GO:0008233 | peptidase activity                                          | 3.0E-04               | 11                             |
|              | GO:0046872 | metal ion binding                                           | 6.6E-04               | 17                             |
|              | GO:0043169 | cation binding                                              | 7.6E-04               | 17                             |
|              | GO:0070011 | peptidase activity, acting on L-amino acid peptides         | 8.3E-04               | 10                             |
|              | GO:0008375 | acetylglucosaminyltransferase activity                      | 8.4E-04               | 3                              |
|              | GO:0008194 | UDP-glycosyltransferase activity                            | 1.5E-03               | 3                              |
|              | GO:0008146 | sulfotransferase activity                                   | 2.4E-03               | 2                              |
|              | GO:0016787 | hydrolase activity                                          | 2.4E-03               | 21                             |
|              | GO:0005544 | calcium-dependent phospholipid binding                      | 5.6E-03               | 2                              |
|              | GO:0016782 | transferase activity, transferring sulfur-containing groups | 6.9E-03               | 2                              |
|              | GO:0005506 | iron ion binding                                            | 7.2E-03               | 3                              |
| Tissues      | GO:0005200 | structural constituent of cytoskeleton                      | 1.1E-07               | 8                              |
|              | GO:0016829 | lyase activity                                              | 2.7E-04               | 6                              |
|              | GO:0017111 | nucleoside-triphosphatase activity                          | 5.5E-04               | 14                             |
|              | GO:0016462 | pyrophosphatase activity                                    | 6.9E-04               | 14                             |
|              | GO:0016818 | hydrolase activity, acting on acid anhydrides...            | 7.6E-04               | 14                             |
|              | GO:0004634 | phosphopyruvate hydratase activity                          | 8.2E-04               | 2                              |
|              | GO:0016817 | hydrolase activity, acting on acid anhydrides               | 8.3E-04               | 14                             |
|              | GO:0003924 | GTPase activity                                             | 1.6E-03               | 8                              |
|              | GO:0003824 | catalytic activity                                          | 2.0E-03               | 48                             |
|              | GO:0016836 | hydro-lyase activity                                        | 2.1E-03               | 3                              |
|              | GO:0016835 | carbon-oxygen lyase activity                                | 2.6E-03               | 3                              |
|              | GO:0003777 | microtubule motor activity                                  | 3.1E-03               | 5                              |
|              | GO:0016830 | carbon-carbon lyase activity                                | 3.6E-03               | 3                              |
|              | GO:0016491 | oxidoreductase activity                                     | 3.6E-03               | 10                             |
|              | GO:0003774 | motor activity                                              | 4.6E-03               | 5                              |
|              | GO:0005198 | structural molecule activity                                | 6.6E-03               | 8                              |
|              | GO:0032561 | guanyl ribonucleotide binding                               | 6.8E-03               | 8                              |
|              | GO:0032550 | purine ribonucleoside binding                               | 6.8E-03               | 8                              |
|              | GO:0001883 | purine nucleoside binding                                   | 6.8E-03               | 8                              |
|              | GO:0005525 | GTP binding                                                 | 6.8E-03               | 8                              |
|              | GO:0032549 | ribonucleoside binding                                      | 7.3E-03               | 8                              |
|              | GO:0001882 | nucleoside binding                                          | 7.6E-03               | 8                              |
|              | GO:0019001 | guanyl nucleotide binding                                   | 8.1E-03               | 8                              |
|              | GO:0008017 | microtubule binding                                         | 9.9E-03               | 4                              |

909

910  
911  
912**Table 4:** *Paragonimus*-conserved and -specific genes with relatively high expression levels in the *P. miyazakii* lung (adult) stage relative to other stages (minimum 1.5-fold expression difference compared to all other stages).

| Gene       | Gene function (InterPro)                           | Expression level (FPKM) |         |       |       |
|------------|----------------------------------------------------|-------------------------|---------|-------|-------|
|            |                                                    | Peritoneal              | Pleural | Liver | Lung  |
| PMIY_10706 | -                                                  | 0                       | 0       | 0     | 1.00  |
| PMIY_04932 | -                                                  | 0                       | 0       | 0     | 0.50  |
| PMIY_04199 | -                                                  | 0                       | 0       | 0     | 0.23  |
| PMIY_05623 | IPR009003: Peptidase S1, PA clan (Serine protease) | 0                       | 0       | 0     | 0.03  |
| PMIY_05645 | -                                                  | 0.03                    | 0       | 0     | 1.08  |
| PMIY_10421 | -                                                  | 0                       | 0       | 0     | 0.03  |
| PMIY_10154 | -                                                  | 0.03                    | 0.17    | 0.25  | 2.10  |
| PMIY_10315 | -                                                  | 0.30                    | 0.26    | 0     | 1.67  |
| PMIY_07404 | IPR028089: Domain of unknown function DUF4455      | 0.05                    | 0       | 0     | 0.22  |
| PMIY_06071 | IPR035914: Spermadhesin, CUB domain superfamily    | 0.16                    | 0.11    | 0.20  | 0.80  |
| PMIY_09494 | -                                                  | 1.61                    | 1.76    | 0.08  | 5.88  |
| PMIY_01683 | -                                                  | 0.24                    | 0.18    | 0.05  | 0.79  |
| PMIY_12118 | IPR021109: Aspartic peptidase domain superfamily   | 0.02                    | 0       | 0     | 0.04  |
| PMIY_06957 | -                                                  | 0.87                    | 1.68    | 1.65  | 3.55  |
| PMIY_00756 | -                                                  | 14.75                   | 20.66   | 16.12 | 43.07 |
| PMIY_01507 | -                                                  | 0.23                    | 0.38    | 0.39  | 0.79  |
| PMIY_11874 | -                                                  | 0.05                    | 0.05    | 0     | 0.10  |
| PMIY_05793 | -                                                  | 0.03                    | 0.06    | 0.26  | 0.47  |
| PMIY_05272 | -                                                  | 5.44                    | 4.20    | 4.22  | 9.67  |
| PMIY_12189 | IPR036259: MFS transporter superfamily             | 1.84                    | 1.72    | 1.73  | 3.25  |
| PMIY_12491 | -                                                  | 0.63                    | 0       | 0.18  | 1.08  |
| PMIY_08946 | -                                                  | 0                       | 0.06    | 0.00  | 0.10  |
| PMIY_12111 | -                                                  | 1.23                    | 0.35    | 1.04  | 2.04  |
| PMIY_02371 | IPR016024: Armadillo-type fold                     | 10.30                   | 9.68    | 12.40 | 20.06 |
| PMIY_11682 | -                                                  | 4.36                    | 6.64    | 5.66  | 10.58 |
| PMIY_12247 | IPR036236: Zinc finger C2H2 superfamily            | 2.84                    | 3.22    | 4.16  | 6.60  |
| PMIY_06566 | -                                                  | 0.63                    | 1.02    | 1.04  | 1.64  |
| PMIY_02942 | -                                                  | 5.32                    | 5.71    | 8.45  | 13.11 |
| PMIY_11404 | -                                                  | 2.40                    | 2.82    | 2.58  | 4.36  |
| PMIY_07606 | IPR009060: UBA-like superfamily                    | 1.33                    | 0.12    | 0.49  | 2.03  |

913

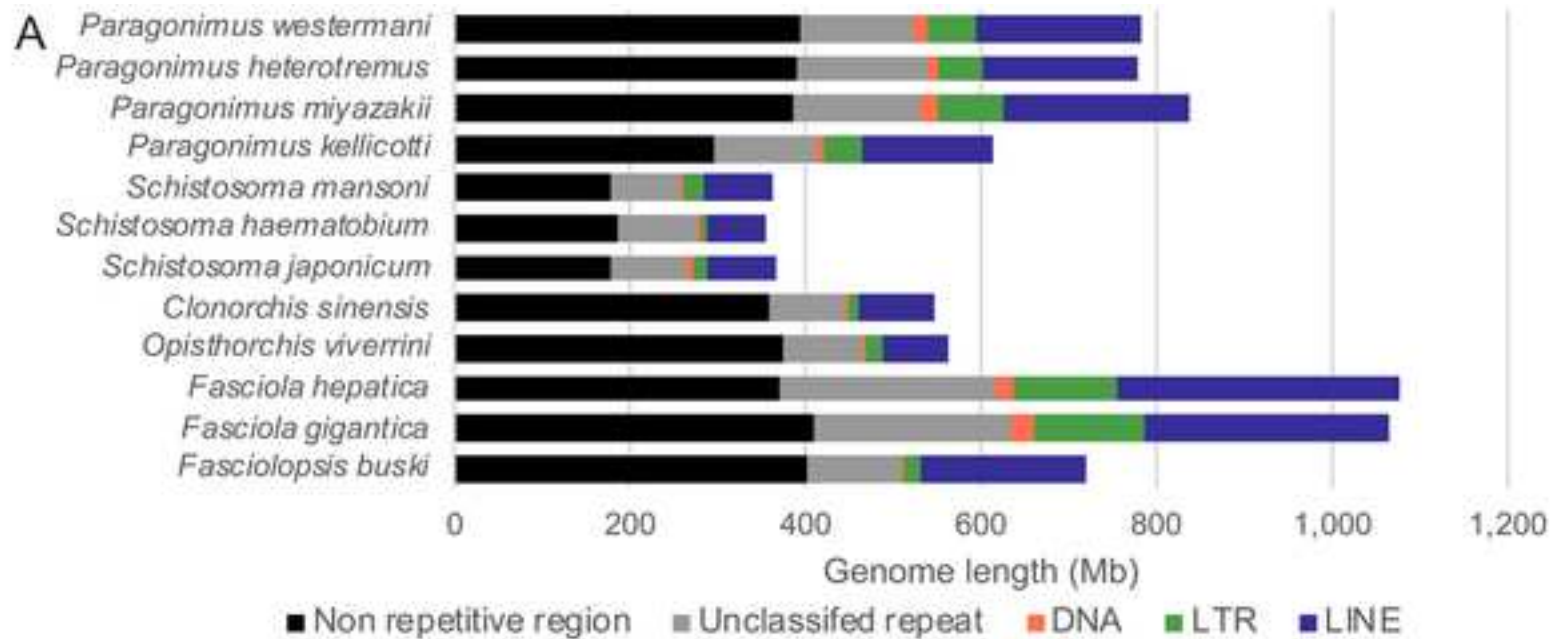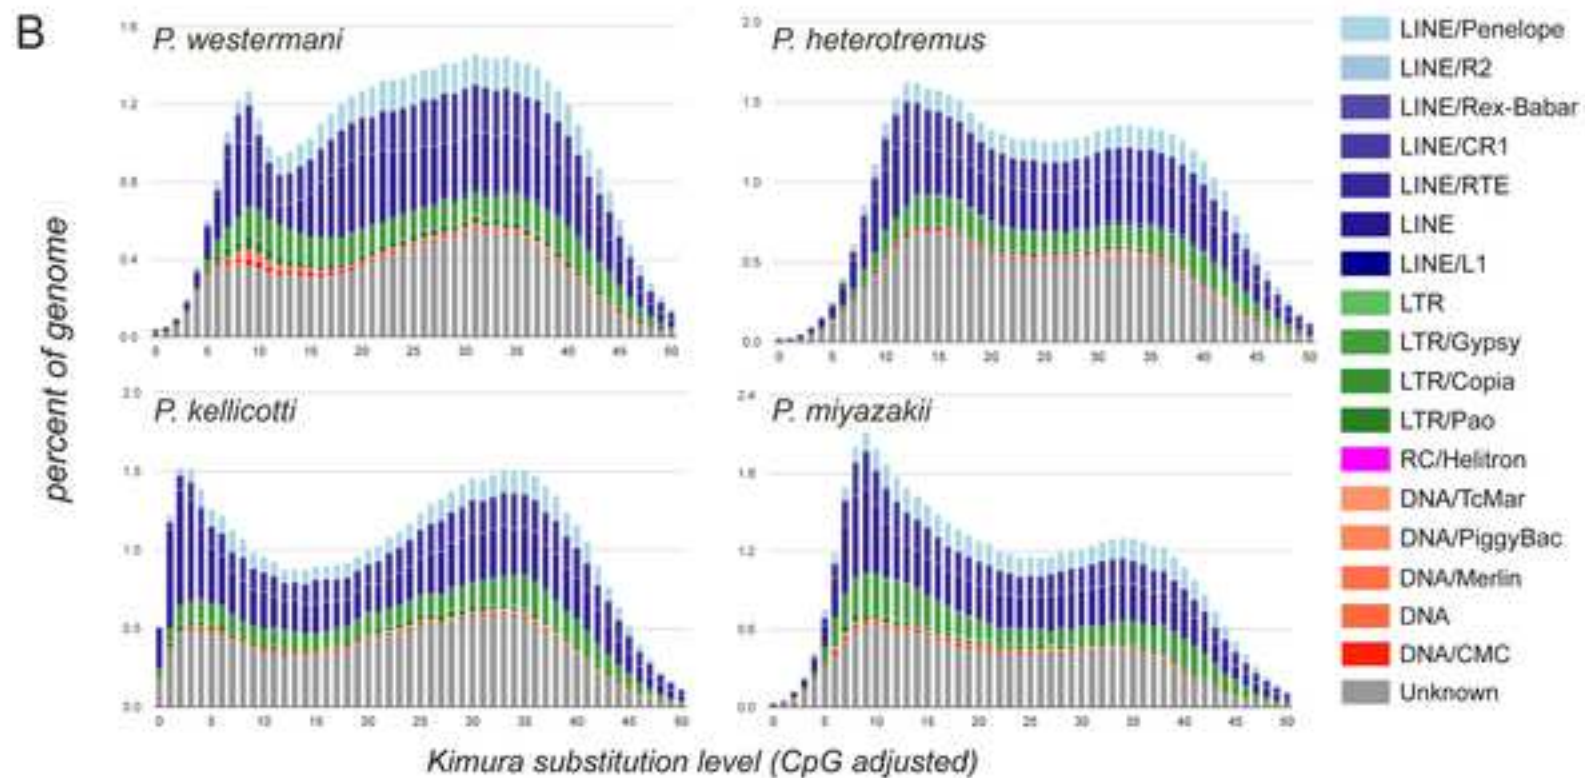

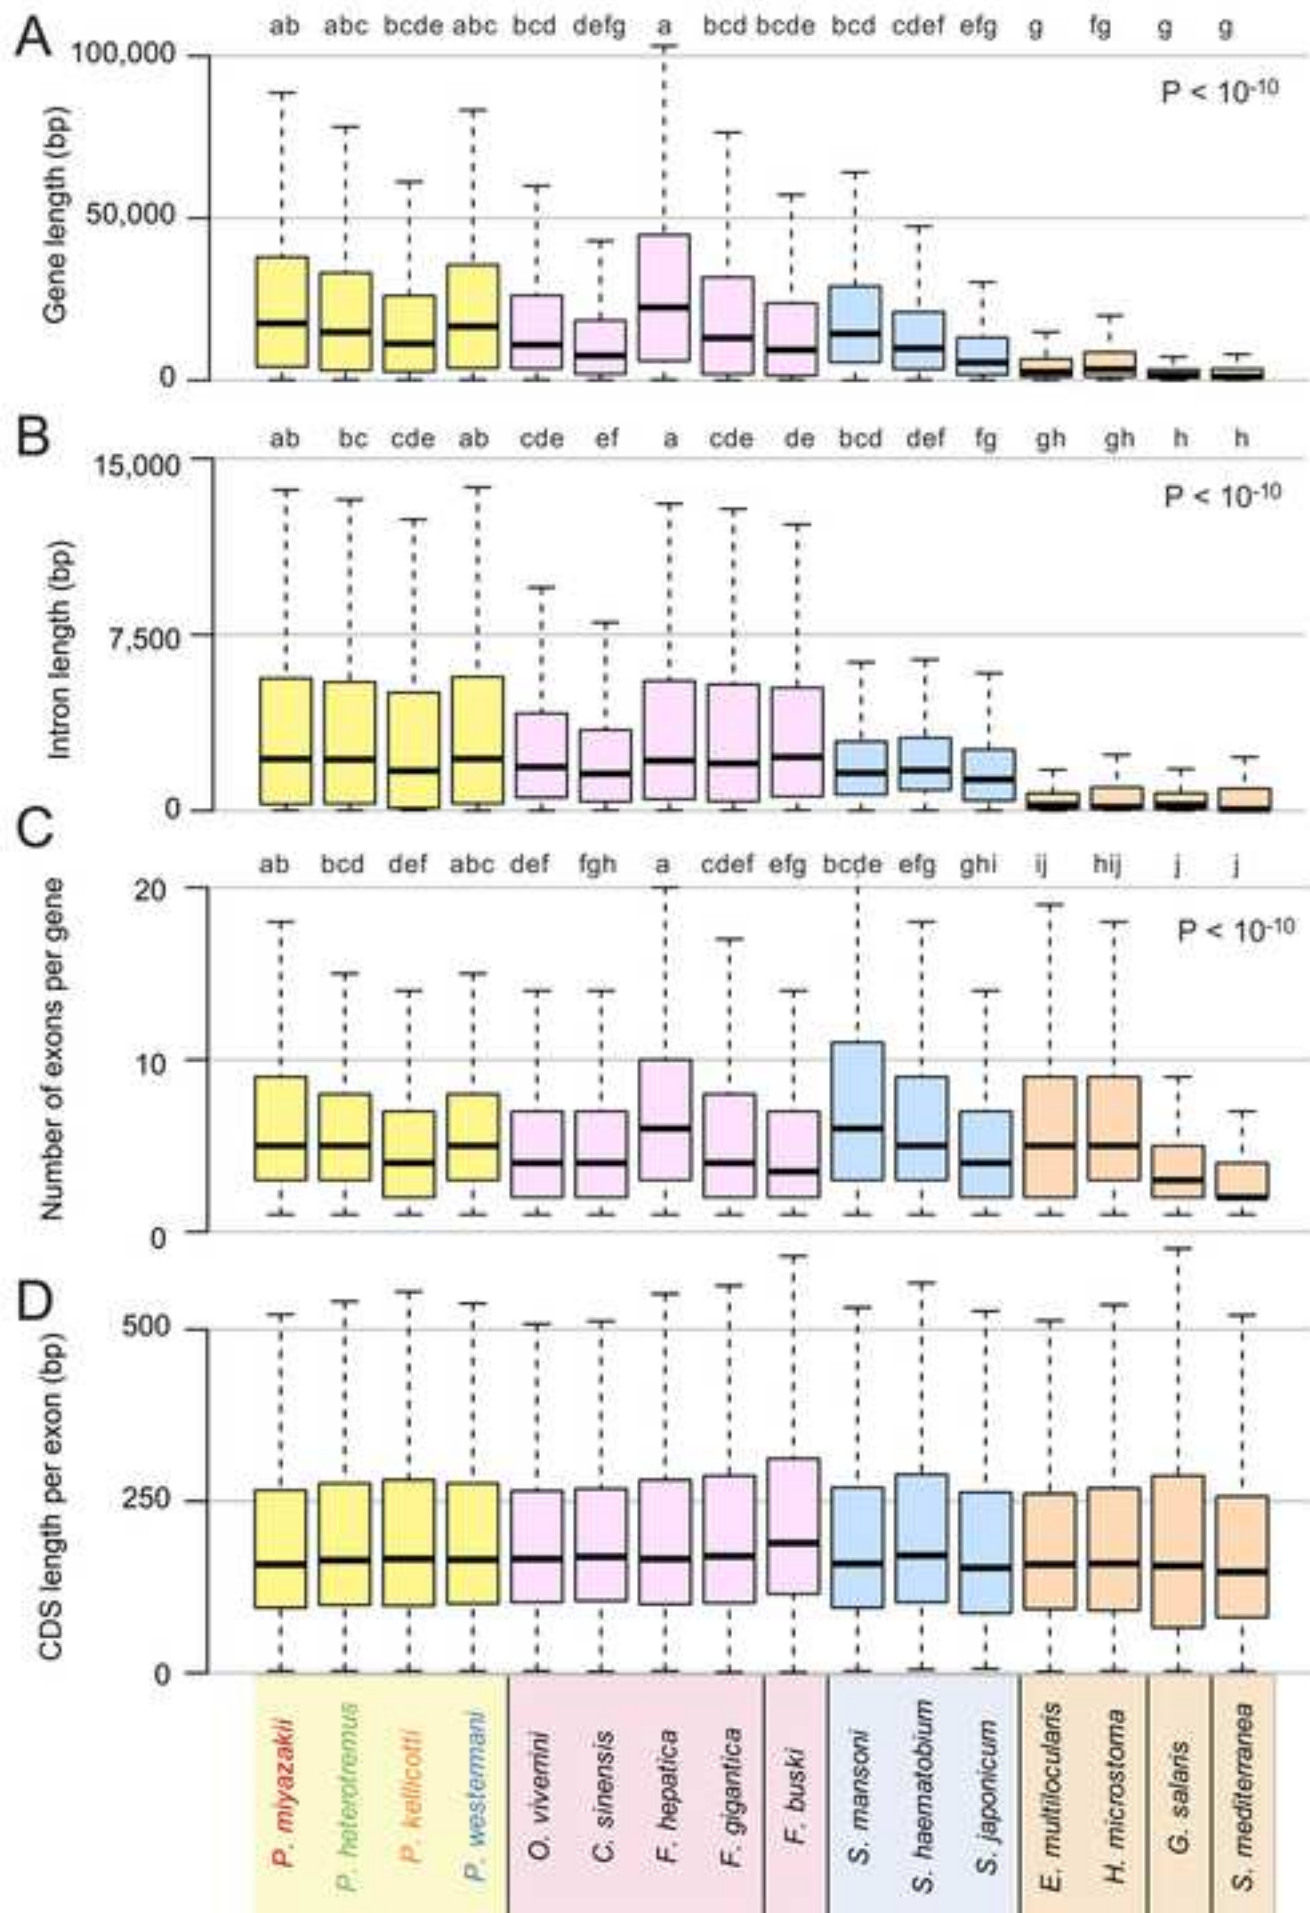

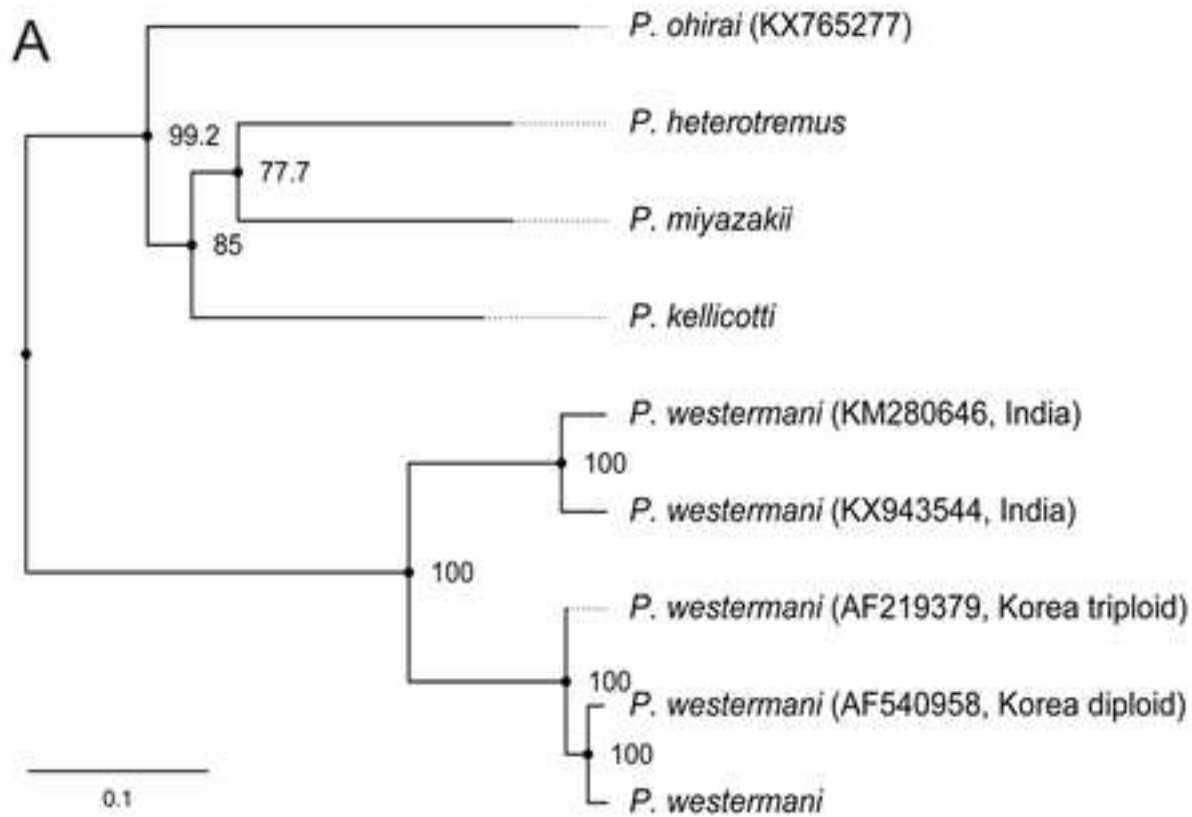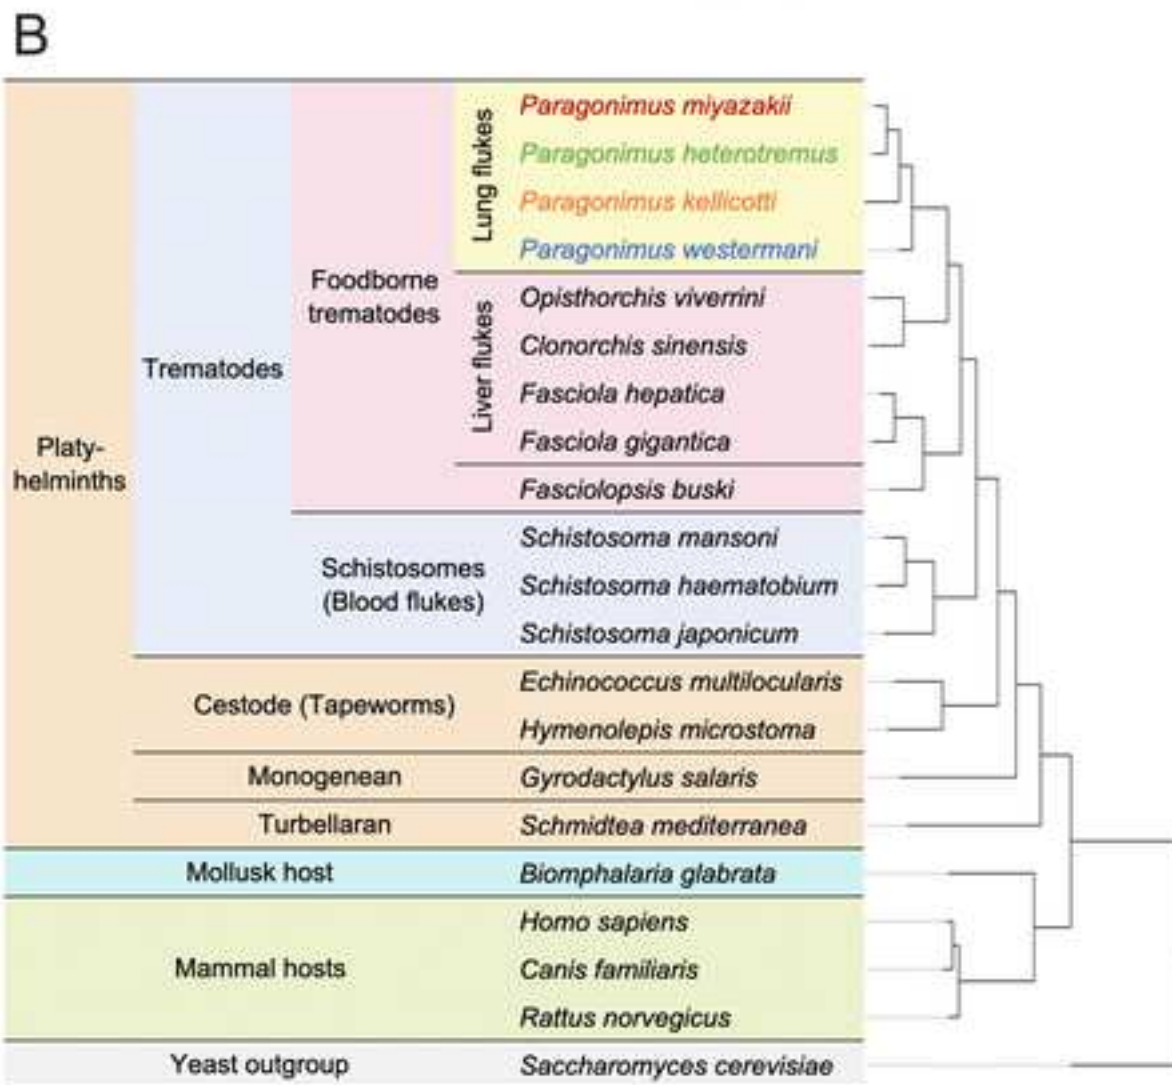



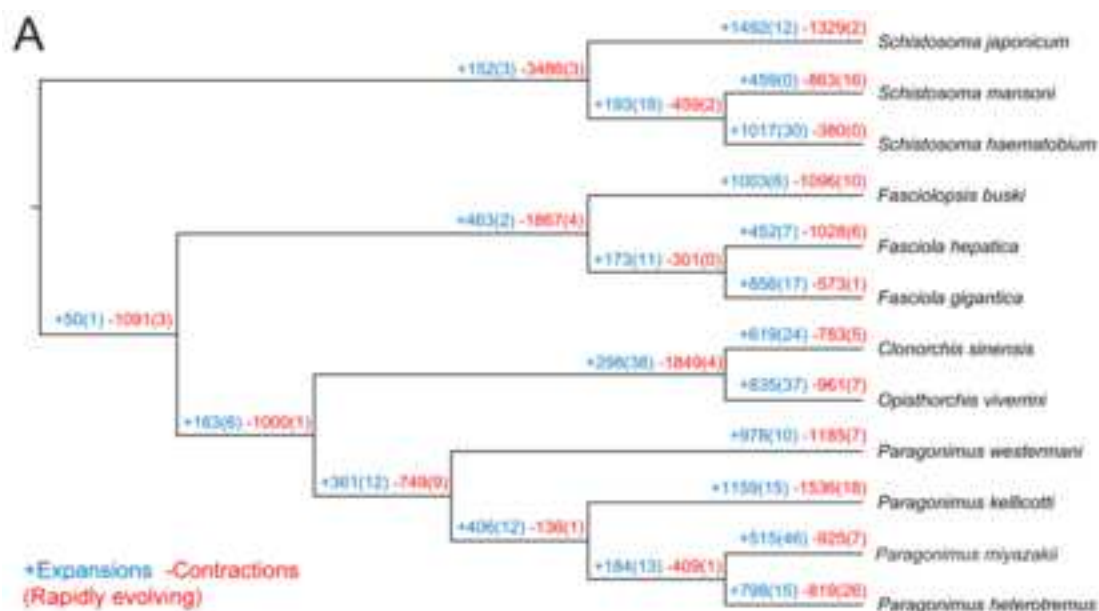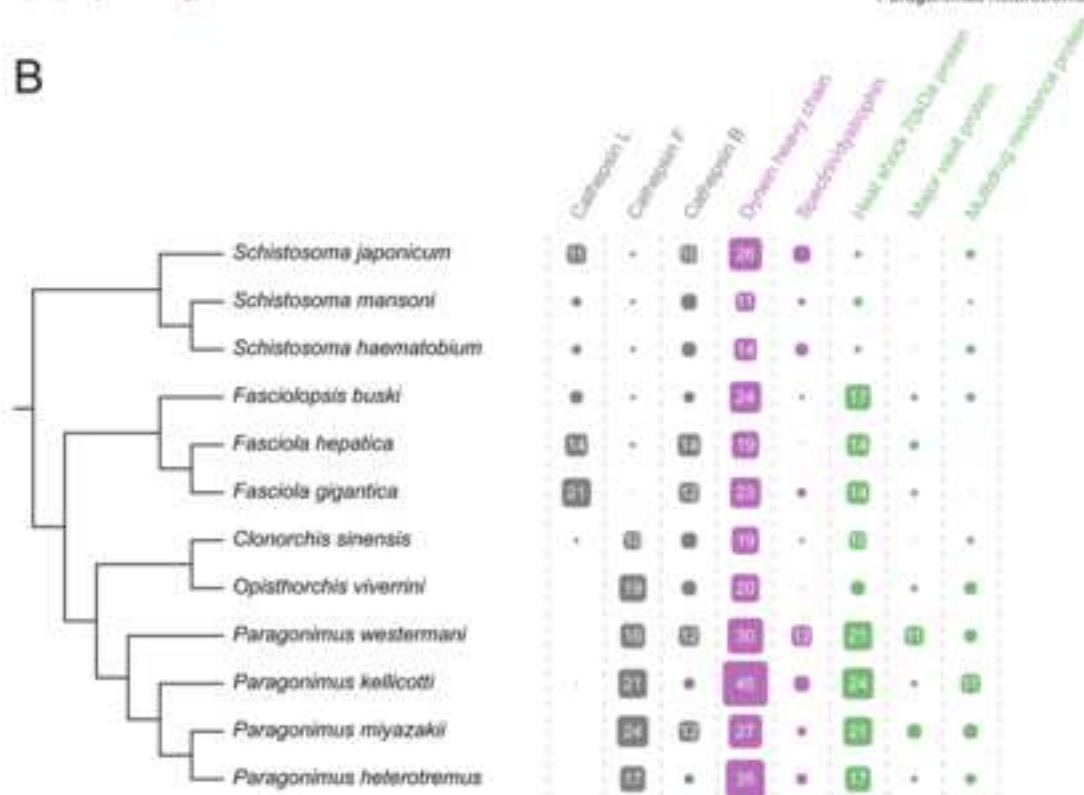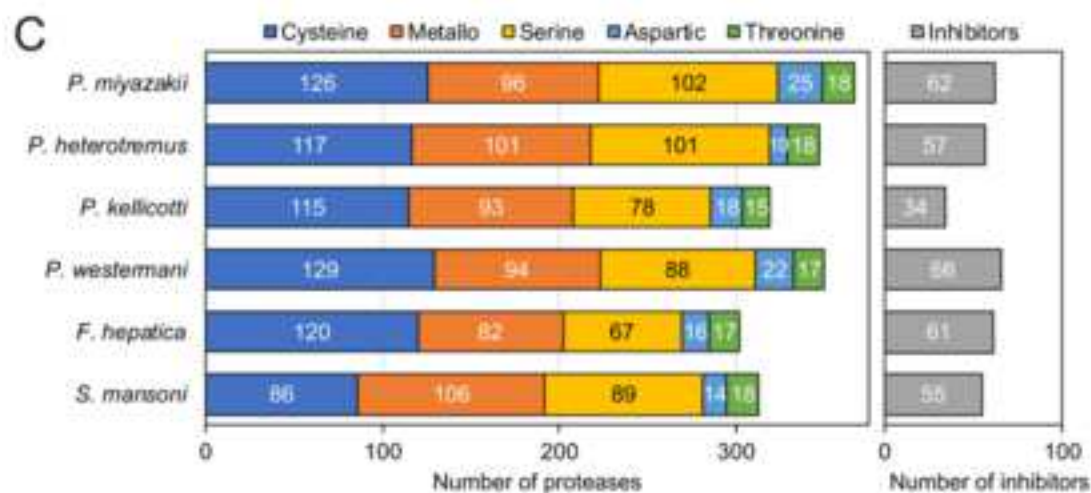

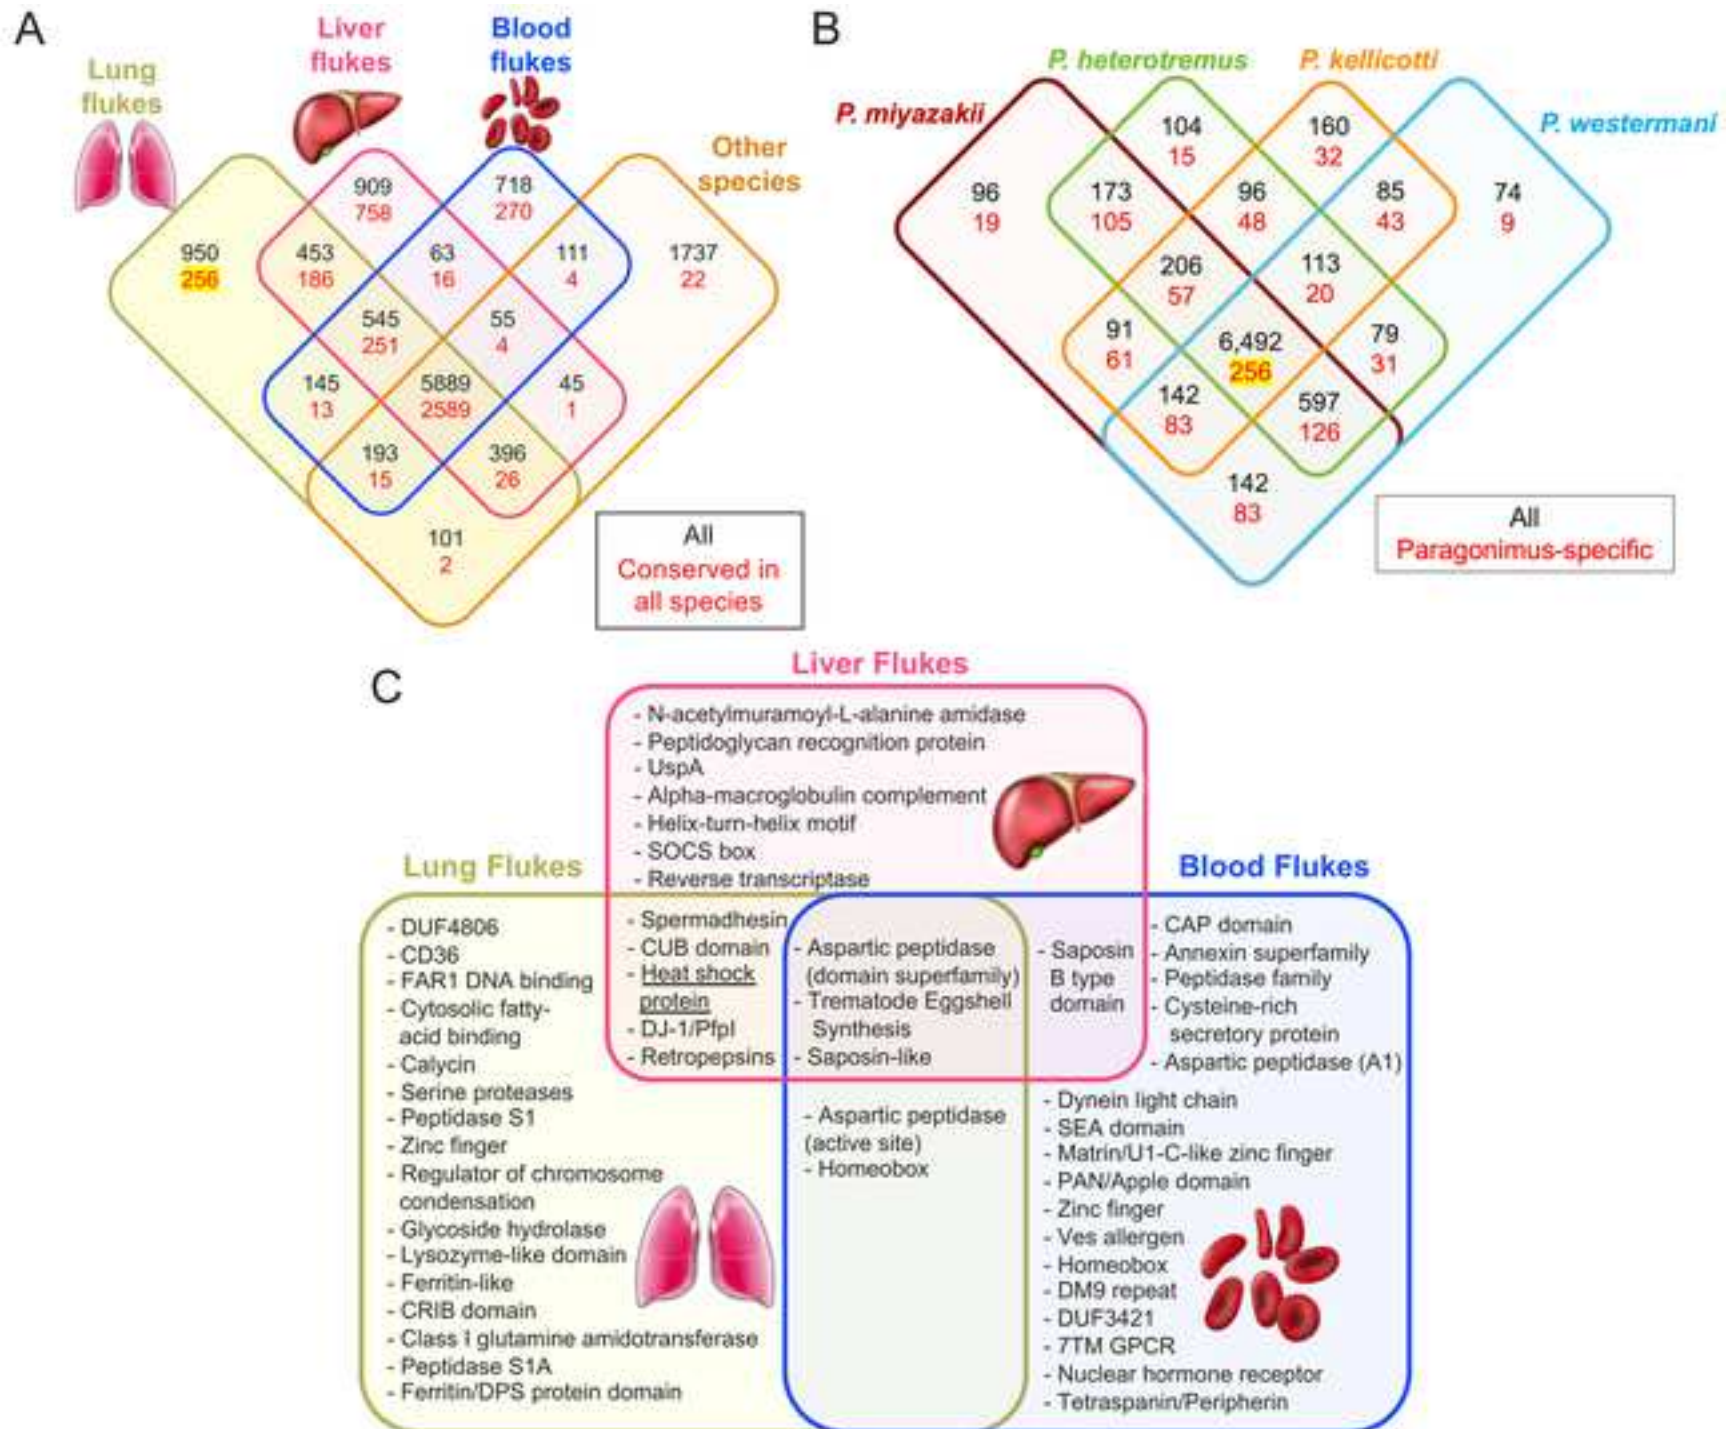



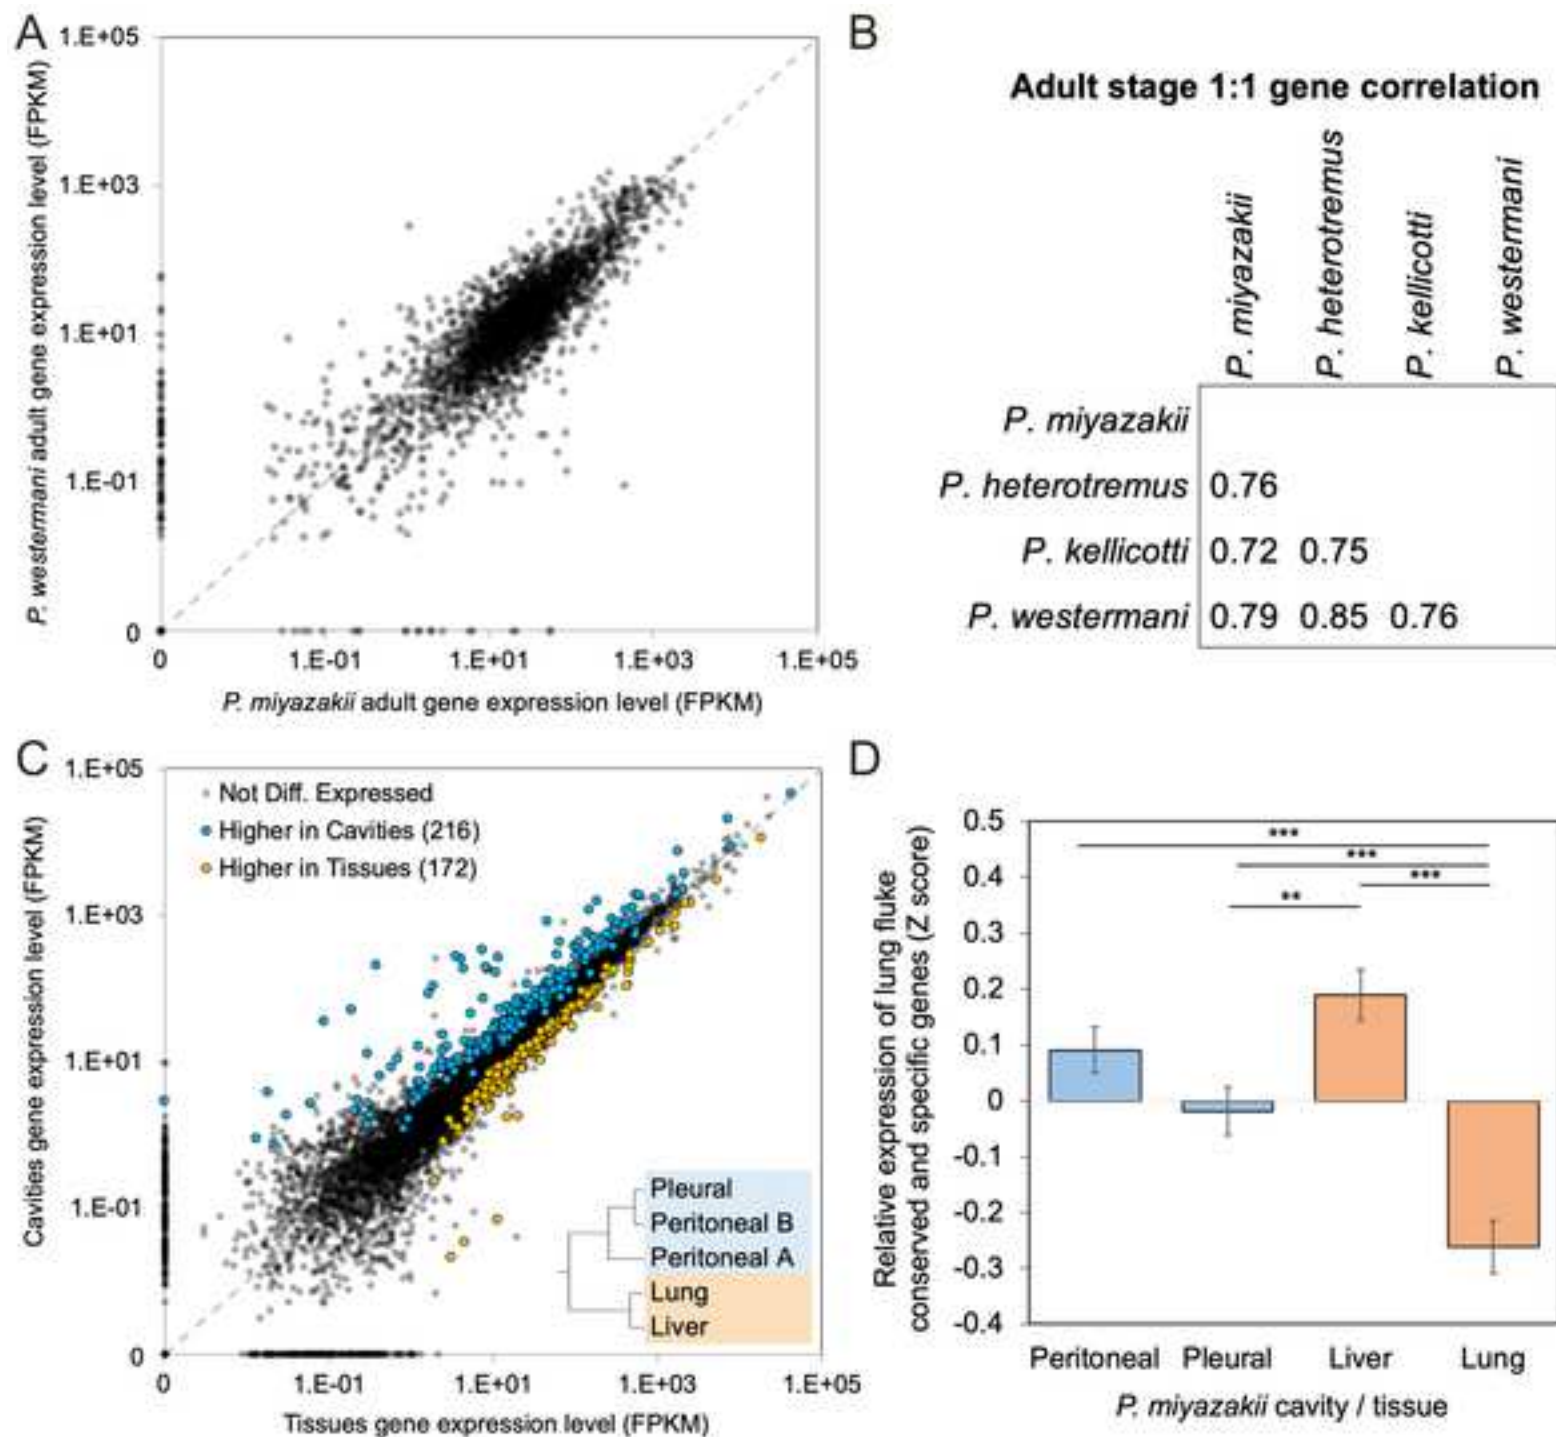

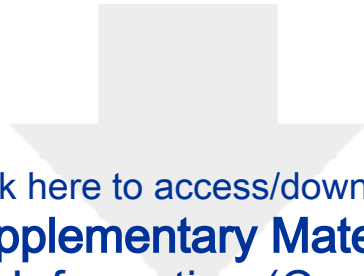

[Click here to access/download](#)

**Supplementary Material**

**Supplementary Information (Combined) V5.docx**

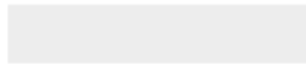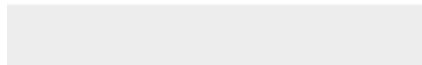

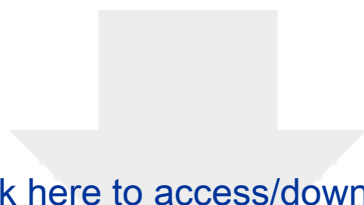

Click here to access/download  
**Supplementary Material**  
Supp Table S1 - Accessions.xlsx

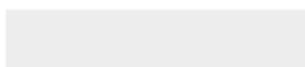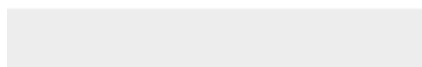



Click here to access/download

**Supplementary Material**

Supp Table S2 - Paragonimus expression data per  
gene.xlsx

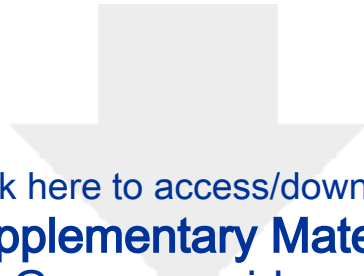

[Click here to access/download](#)

**Supplementary Material**

Supp Table S3 - Genome-wide selection scan.xlsx

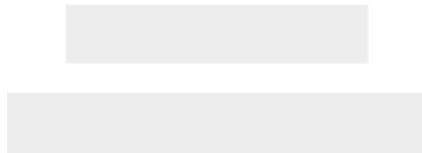

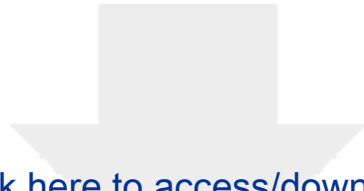

Click here to access/download  
**Supplementary Material**  
Supp Table S4 - OGs and FPKM.xlsx

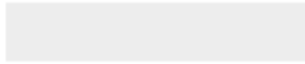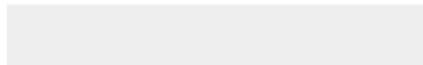

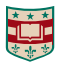

To  
Dr. Nicole Nogoy  
Editor  
Gigascience

3/18/2019

Re: **GIGA-D-19-00411** revision

Dear Dr. Nogoy,

Thank you for inviting us to submit a revised version of our manuscript: "*Comparative genomics and transcriptomics of four Paragonimus species provide insights into lung fluke parasitism and pathogenesis*" (GIGA-D-19-00411).

We appreciate the reviewer suggestions for improving the manuscript, and as our point-by-point response to the reviewer document shows, we have now comprehensively addressed all of the concerns and revised the manuscript in accordance with the reviewer's recommendations. We very much appreciate the efforts of the referee in recommending how to best revise this manuscript. We have followed their advice especially closely and are hopeful that the paper will now pass muster and we trust you will find it suitable for publication in Gigascience.

Thank you for your consideration.

Yours sincerely,

**Makedonka Mitreva, PhD**

Professor, Department of Medicine and of Genetics,  
Assistant Director, McDonnell Genome Institute,  
Director, Center for Clinical Genomics of Microbial Systems,  
Washington University School of Medicine

**GIGA-D-19-00411**

Point-by Point Response to reviewers' comments

Blue text: author's response.

Green text: Edited text on the manuscript.

**Reviewer 1**

The manuscript entitled "Comparative genomics and transcriptomics of four *Paragonimus* species provide insights into lung fluke parasitism and pathogenesis" provides four new draft genomes for the genus, which are a great contribution for the field. Overall, the group did a great job in the whole paper, using mostly good method strategies and were very descriptive. Here are some comments:

1-1. The data description section seems to be a poor "method" section which seems redundant. The software names are missing (just their citations are shown) and is basically the same information provided in the methods section, which is well written. If any information on this section is important to be kept, I would fit this information in the methods section and delete the whole section.

Author response: As suggested, we have removed the "data description" section and moved some of relevant details into the "methods" section.

1-2. The Analysis section should be renamed to Results and Discussion

Author response: This change has now been made.

1-3. Line 185-186 - the authors mentioned the draft genome sizes obtained and their respective completeness. Is this based in which expected complete genome size? Is there any complete genome of the genus complete (no gaps, physical evidence, telomere to telomere)? I understand that this is an estimation, but the authors should be careful and at least mention the expected "complete" genome size. Since we are talking about different species, these sizes should vary for each species.

Author response: "Completeness" is based on BUSCO completeness scores, which quantify the number of conserved genes identified among the genomes. We have changed this sentence to clarify in the results and discussion, and we have updated Table 1 to Include additional BUSCO statistics (see also response 2-3 to reviewer 2):

**Section: Results and Discussion**

"These draft genomes are estimated to be between 87% and 96% complete, according to BUSCO completeness estimates that include complete and fragmented eukaryote genes [17], with the new *P. westermani* genome produced from a sample collected from Japan being slightly more complete than the previously-sequenced genome produced from a sample collected from India [12] (96.4% vs 94.1%, respectively; Table 1)."

1-4. Line 205 - the group mentioned that some Orthologs vary in intron lengths and number of exons. Genomes that are highly repetitive (>50% repetitive) are usually very fragmented or have their most complex regions poorly assembled by short reads. Besides the group method using two libraries sizes for the Illumina applied using AllPaths, which I consider one of the best approaches for Illumina only assembly for this kind of complex genomes, there is a chance that these variations are due to problems in the assembly or frameshifts. Please provide how all these variations were validates to be real (Alignment support, etc).

Author response: In order to minimize the effect of gene fragmentation on calculating the gene/exon/intron length statistics, as stated already in the methods, these statistics "were defined using only the longest and only the complete mRNA (with identified start and stop codon) for each gene". This ensured that the genes used for the analysis were all complete and would exclude those split by repeats or short contigs. However, we



do still recognize the potential for some of the species-to-species differences to arise due to different assembly read lengths and qualities. We have appended this text acknowledging this potential issue:

### Section: Results and Discussion, genome features

“Focusing on the gene content, *P. kellicotti* had the shortest average total gene length among the species, and the lung flukes overall had similar gene lengths to other flukes, while platyhelminth species other than trematodes have shorter genes overall (Figure 2A). The variability in gene lengths observed between species results from differences in both average intron lengths (Figure 2B) and the average number of exons per gene (Figure 2C) while the average coding sequence (CDS) lengths of the exons across all the platyhelminth species were similar to each other (Figure 2D). Whereas there was species-to-species variability in gene lengths and exon counts, consistent patterns among the types of flukes were not apparent. **Some of this variability may have arisen due to the variation in quality of the assemblies, but these differences were minimized by only using complete gene models with a start and stop codon identified in the same frame.**

1-5. Line 422 - There is no need to mention the method in the Result and Discussion section. This was also observed in other lines in the Results section (eg. Line 291, 355,etc).

Author response: We have removed references to the tools used at these lines in the text, since they are indeed mentioned already in the methods section (Interpro, Orthofinder and DESeq2, respectively).

1-6. Line 231-2 - How the identity was calculated? WGS or Orthologs? Amino-acid or Nucleotide level? This is really important when comparing identities between species, since assembly bias could be detected. This information should be added in the methods.

Author response: We reported the sequence identity between the geographically diverse *P. westermani* samples at the nucleotide level. We have revised the text to clarify this point, and expanded the methods section to describe the approach that was used to estimate the genome-wide mean divergence rate.

### Section: Results and Discussion

“Although our *P. westermani* reference genome was assembled using samples collected from Japan (Amakusa, Kyusyu). We compared the genomic sequences of our East Asian *P. westermani* to the recently published *P. westermani* genome from India (Changlang, Arunachal Pradesh) [12] to estimate the genetic divergence between geographically diverse samples. This analysis identified an average nucleotide sequence identity of 87.6%.”

### Section: Methods

“MUMmer v4.0 [95] was used to estimate the level of genetic divergence between *P. westermani* samples from Japan and India. Nucmerum was run first to generate genome alignments using draft assembly sequences. Dnadiff was then used to calculate the average sequence identity between the genomes considering only 1-to-1 alignments.”

1-7. Line 383-6 - I understand the idea of the group to give the organism-specific conserved orthologs for potential drug targeting, but when doing this I would recommend adding more information about these proteins, like localization, protein weight, TM and signal peptides, is that any hit in ChEMBL, etc. This would save time for the community that will read the paper to remove possible noise before starting to test the screening.

Author response: We have now added additional annotation data to Table S2, including (i) localization predictions by PANNZER gene ontology (cellular component category), (ii) TM and signal peptide predictions by Phobius, (iii) protein weight predictions and pi values (ExPASy) and (iv) hits to ChEMBL. This is in addition to the existing annotations that included Interpro domains, GO categorizations, MEROPS protease predictions, and KEGG enzyme predictions. We have added the following to the text:

## Section: Results and Discussion

“The comparative analysis presented here identifies valuable putative protein targets for drug development, including *Paragonimus*-specific proteins and trematode-conserved proteins which do not share orthology to human proteins. The protein annotation data available in Supplementary Table S2 also will enable prioritization including biological functional annotations [58, 59], protein weight and pi predictions [60], predictions of signal peptides and transmembrane domains [61] and cellular compartment localization [58], and sequence similarity matches to targets in the ChEMBL database [62].”

## Section: Methods

“The completeness of annotated gene sets was assessed using BUSCO v3.0, eukaryota\_odb9 [17]. Gene Ontology (GO), KEGG and protease annotations were performed using InterProScan v5.19 [59], GhostKOALA [60], and MEROPS [89], respectively. ExPASy was used to perform protein weight and pi predictions [61], SignalP was used to predict signal peptides and transmembrane domains [62], and gene product localization was predicted using the “cellular component” Gene Ontology annotations provided by InterProScan [59].”

1-8. Line 419 - Discussion should change to Conclusion

Author response: This has been changed.

1-9. Line 435-443 - Fresh *Paragonimus* (never frozen or stored for a long time) should be better for long sequencing, since there is less chance to have their DNA broken. This could affect differences in contiguity of some genomes.

Author response: Most of the samples that were used for PacBio sequencing were prepared fresh, but if storage was required they were flash frozen at -80°C to minimize degradation.

1-10. Line 446-454 - Why the group didn't try a hybrid approach for the assembly using long and short reads together? Why PBJELLY (usually reported to be used as gap filler tool for PacBio) was used for assembly of the long reads (CANU, HGAP and FALCON are much better), maybe it should be revised.

Author response: We generated PacBio reads primarily for the purpose of assembly improvement, such as gap-closing and scaffolding. The depth of coverage was adequate (43x) to perform PBJelly-based genome improvements, but too shallow to try other approaches. At the time, long-read sequencing was still too costly to perform de novo assembly of ~1GB genome (using CANU, HGAP or FALCON).

1-11. Besides Pilon being a good choice for basecall polishing, I would recommend ICORN for the mitochondrial polishing. From my personal experience it usually corrects more regions than Pilon.

Author response: We have manually confirmed the validity of the corrections made by Pilon by critically assessing any inconsistencies between the assembly and the evidence in the reads. We have had a good experience using Pilon, and it can outperform iCORN for certain datasets (Walker et al., 2014, PMID:25409509).

1-12. There is no coverage obtained in the text about the sequencing datasets (Illumina/PacBio #X coverage). This is important to check how good was the basecall and polishing.

Author response: The coverage statistics are now included in the supplementary table:

**Supplementary Table S1:** *Paragonimus* genome and RNA-Seq accessions

**Genome assemblies, annotations and raw reads**

| Species                         | NCBI accession | Bioproject ID | Genome coverage (x) |
|---------------------------------|----------------|---------------|---------------------|
| <i>Paragonimus miyazakii</i>    | JTDE00000000   | PRJNA245325   | 162                 |
| <i>Paragonimus heterotremus</i> | LUCH00000000   | PRJNA284523   | 81                  |
| <i>Paragonimus kellicotti</i>   | LOND00000000   | PRJNA179523   | 77 (43*)            |
| <i>Paragonimus westermani</i>   | JTDF00000000   | PRJNA219632   | 152                 |

\*Pacbio dataset coverage

1-13. And here are some minor points: Line 113 - *P. westermani* is not in italic;

Author response: This has been fixed.

1-14. Line 513 - change 3 for "three";

Author response: This has been fixed.

1-15. Figures are in low resolution.

Author response: The PDF displays the figures in low resolution, but they are all the maximum width and resolution specified (6.693 inches wide, 300 dpi) in their uploaded format, which can be accessed by clicking the top-right of each page.

## Reviewer 2

The submitted manuscript describes the sequencing, assembly, annotated and analysis of four species of the genus *Paragonimus*. The sequencing was predominantly Illumina short reads, with PacBio long reads generated for *P. kellicotti*. The authors conduct different gene family analyses, propose molecular components of host-parasite interactions, and identify proteins which are potential targets for vaccines or diagnostics. The authors also generate some RNA-Seq data for each species.

The generation and presentation of genomic assemblies for these four species will be useful in understanding their biology and developing new treatment. For the most part the manuscript is well written and easy to understand, for which the authors should be commended. However, I do have major concerns with the manuscript as presented.

2-1: I tried to download much of the data to repeat the analyses but the speed of connection was slow. Therefore, I have looked into one section in more detail, the prediction of mimicry between *Paragonimus* proteins and their hosts. From lines 330 to 347, the authors describe orthologous genes (OGs) which are shared between at least one species of *Paragonimus* and their host to the exclusion of other trematodes (Figure 5D). The authors then speculate that these "may have evolved uniquely in lung flukes to mimic host factors[.]" Unfortunately, this is an artefact of sampling bias. I used BLAST to compare human STOX1, Zip67, and C5orf63 with *Paragonimus*, *Schmidtea mediterranea* and *Caenorhabditis elegans* proteins. For the first two, it is clear sequence similarity is similar or greater in *S. mediterranea* and *C. elegans*, raising reasonable doubt on specific mimicry between *Paragonimus* and human proteins. For C5orf63, the evaluate of the alignment with a *P. westermani* protein was 0.041 and over only 40 amino acids. This suggests that it is an artifact of the clustering process in the OG generation.

```
blastp -outfmt 6 -max_hsps 1 -query STOX1.pep.fsa -db ../data/all.protein.fa | head -5
STOX1_HUMAN F53B2.6 33.758 157 102 1 33 189 16 170 3.44e-28 120
STOX1_HUMAN SMEST040264001 29.348 184 130 0 19 202 15 198 2.75e-22 103
STOX1_HUMAN PKEL_11588 35.088 114 71 2 33 144 28 140 2.39e-13 71.6
STOX1_HUMAN PMIY_01855 33.043 115 74 2 32 144 27 140 3.42e-12 72.0
STOX1_HUMAN PWES_01040 33.628 113 72 2 34 144 29 140 1.20e-09 63.2
```

```
blastp -outfmt 6 -max_hsps 1 -query Zip67.pep.fsa -db ../data/all.protein.fa | head -6
ZN653_HUMAN F45B8.4 33.918 171 106 4 442 612 101 264 7.44e-22 98.6
```

|             |                |        |     |    |   |     |     |     |     |          |      |
|-------------|----------------|--------|-----|----|---|-----|-----|-----|-----|----------|------|
| ZN653_HUMAN | SMEST004840001 | 44.048 | 84  | 47 | 0 | 496 | 579 | 211 | 294 | 1.50e-18 | 89.0 |
| ZN653_HUMAN | SMEST060422001 | 36.607 | 112 | 68 | 2 | 469 | 577 | 464 | 575 | 2.11e-18 | 91.7 |
| ZN653_HUMAN | SMEST058261001 | 35.484 | 155 | 92 | 5 | 460 | 614 | 77  | 223 | 1.63e-17 | 86.7 |
| ZN653_HUMAN | SMEST042630001 | 36.885 | 122 | 73 | 2 | 490 | 611 | 183 | 300 | 6.75e-17 | 84.3 |
| ZN653_HUMAN | PMIY_03311     | 46.988 | 83  | 44 | 0 | 496 | 578 | 200 | 282 | 7.00e-17 | 83.6 |

Query= YD286\_HUMAN Glutaredoxin-like protein C5orf63 OS=Homo sapiens  
OX=9606 GN=C5orf63 PE=2 SV=3  
Length=138

|                                                                              | Score | E     | (Bits) | Value |
|------------------------------------------------------------------------------|-------|-------|--------|-------|
| Sequences producing significant alignments:                                  |       |       |        |       |
| PWES_06707                                                                   | 33.5  | 0.041 |        |       |
| >PWES_06707                                                                  |       |       |        |       |
| Length=136                                                                   |       |       |        |       |
| Score = 33.5 bits (75), Expect = 0.041, Method: Compositional matrix adjust. |       |       |        |       |
| Identities = 17/43 (40%), Positives = 23/43 (53%), Gaps = 2/43 (5%)          |       |       |        |       |
| Query 16 FGLFLRNCSASKTTLPVLTFTKDPCLCDEAKEVLKPYENRQ 58                        |       |       |        |       |
| G ++ S +K LP L +FTK C LC A L+PY N+                                           |       |       |        |       |
| Sbjct 26 LGQYISTISIAK--LPTLIVFTKPDCLCKAAIVQLQPYYVNHK 66                      |       |       |        |       |

I recommend that the authors rethink their strategy for identifying molecular mimicry or remove the section entirely.

Author response: We acknowledge that OrthoFinder's classification system may produce false positives in terms of species-restricted orthology, since in some cases such as those described here, similar genes may be divided into several orthogroups. In order to avoid overstating the significance of these particular orthologous groups, we have taken the reviewer's suggestion and removed this section from the manuscript, along with the accompanying Figure 5D and Table 3, and other mentions throughout the text.

2-2. The authors generated several RNA-Seq datasets for each species. Most of these were done single copies. Where replication was done, the authors note that they are 'technical replicates', from which I understand that the samples are from the same biological source but run sequenced twice. These data are great for genome annotation, i.e. the identification of gene models. But, the accurate identification differentially expressed genes requires biological replicates. The authors' use of DESeq is not appropriate given the available data. Further, they should not be comparing FPKM as a statistically robust method to determine differential gene expression. Traditionally, people have asked for three biological replicates, though in depth modelling has shown that one needs to consider sequencing depth in addition to replication. I encourage the authors to read Schurch et al. <https://www.ncbi.nlm.nih.gov/pubmed/27022035>. I do appreciate that getting sufficient number of biological replicates in parasite systems is a challenge. However, this cannot justify having insufficient power in an analysis. Better not to conduct the analysis at all. I recommend that all references to differentially expressed genes is removed from the manuscript.

Author response: The "technical replicates" are only indicated in order to clarify that there are two accessions on NCBI for the same samples. For all downstream analysis, mapped read counts were summed for technical replicates to generate a single biological replicate. We recognize that these should never be used for statistical purposes. As the reviewer acknowledges, it is difficult to obtain biological samples. Given the limitations of the dataset, we have made the best possible use of the data and treated the three samples from the "cavities" as "replicates" (one pleural cavity, two biological replicates from the peritoneal cavity), and the two samples from the "tissues" as "replicates" (one from the lung, one from the liver). See the bottom-right corner of Figure 6C for how those samples cluster and how they were used. Using these different sample types as replicates will increase noise since they will vary within groups, which is why we see a relatively low number of differentially expressed genes (216 higher in cavities, 172 higher in tissues), but we feel that as long as it is not misrepresented in the text as direct biological replicates of the exact same tissues, there is nothing statistically incorrect about performing the analysis this way, especially when the alternative is having very little analysis of these rare and valuable samples.

FPKM values were only calculated for providing normalized expression values (normalized to library size and gene length), for the purposes of visualization (Figure 6) and data presentation (Table 4). DESeq2 was run using raw read counts per gene per sample, as indicated in its manual, since it uses a negative binomial

statistic. Supplementary Table S2 also provides both the raw read counts and the normalized expression values, so that readers can run additional analyses using either value. The relevant DESeq output (FDR-adjusted P values and log2 fold changes) are also provided in that table, for every gene, so that the analysis process is as transparent as possible.

We recognize that more biological replicates from each tissue would be ideal, but since these are very difficult to obtain and since this analysis is not the main focus of the manuscript (just two paragraphs in results/discussion), we feel that it is still valuable to provide a preliminary analysis of the transcriptional differences during parasitism in *Paragonimus*.

To more clearly demonstrate the correlation values between the sample sets, we have now added **Supplementary Figure S4**, which shows the complete correlation table in addition to the clustering:

### Section: Supplementary Information

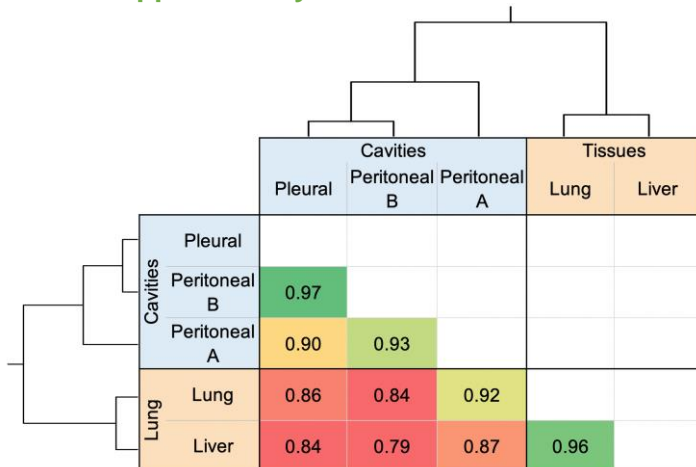

**Supplementary Figure S4:** Pearson correlation values between *Paragonimus miyazakii* RNA-seq samples, based on overall gene expression patterns.

We also now reference this more directly in the text:

### Section: Results and Discussion - Gene expression analysis identifies stage-specific lung fluke functions

“Worms from additional life cycle stages were collected for *P. miyazakii*, including samples sequenced from cavities (peritoneal and pleural cavities) and tissues (lung and liver). Based on gene expression profiles across all genes, the cavity samples clustered and correlated more closely with each other than with the peritoneal samples (and vice versa; Supplementary Figure S1).”

Unlike with the differential expression data, the expression data for conserved-and-exclusive orthologous groups did use single replicate data. We have now added the following to directly acknowledge the lack of replication used for this approach:

### Section: Results and Discussion - Gene expression analysis identifies stage-specific lung fluke functions

“However, to confirm these gene expression patterns for specific larval stages, followup studies with additional biological replicates are needed.”

2-3: The reported BUSCO scores are between 86% and 96% (Table 1). When comparing to parasite.wormbase, three of these *Paragonimus* assemblies would have the highest BUSCO score for any platyhelminth species and all are far above the best trematode, a reference quality assembly of *S. mansoni*. Further, in Table 1, the authors report a BUSCO score of 94.1% for *P. westermani* (India) previously sequenced (Oey et al.). However, Oey reports a BUSCO score of 65.3%. I ran BUSCO on *P. westermani*



(Japan) using the eukayota orthologue set (-l eukaryota\_odb9) and got "C:77.9%[S:76.9%,D:1.0%],F:8.9%,M:13.2%,n:303". I presume that the authors used a different orthologue set for the "--lineage", but they do not state which one. Please can the authors provide further clarification.

Author response: We ran BUSCO v 3.0 using the eukaryota\_odb9. This was ran against the gene set to better reflect the quality of both the assembly and the annotation. However, in our estimates of completeness, we had included the "fragmented" genes as being present. Since these may or may not be considered "complete", we have now expanded Table 1 to include the classifications of BUSCO genes (complete single copy, complete duplicated, fragmented, missing, and overall completeness that includes the complete + fragmented, as before). Our numbers for *P. westermani* (Japan) are slightly higher than the numbers provided by the reviewer here because our assembly has been updated (88.78% complete, singly copy, vs 77.9%). Both Oey and WormBase Parasite use the metazoan lineage dataset (n = 978) rather than eukaryota (n = 303), and according to Wormbase's release notes, they are still using BUSCO 2.0 (Dec 2018 update). Using WormBase Parasite's approach, even *Schistosoma mansoni*, which has a chromosome-scale assembly (PMID: 22253936) has only 78.9% completeness (71.2% complete single, 3.5% duplicated, 4.2% fragmented), so we feel that using eukaryote is more reflective of accurate genome completeness. This same approach has been used for other helminth species including *Heterohabditis bacteriophora* in Gigascience, 2019 (PMID: 29617768).

In addition to updating Table 1 (below), we have added additional clarification in the text:

### Section: Results and Discussion

"These draft genomes are estimated to be between 87% and 96% complete (according to BUSCO completeness estimates that include complete and fragmented eukaryote genes [17]), with the new *P. westermani* genome produced from a sample collected from Japan being slightly more complete than the previously-sequenced genome produced from a sample collected from India [12] (96.4% vs 94.1%, respectively; Table 1)."

### Section: Methods

"The completeness of annotated gene sets was assessed using BUSCO v3.0, eukaryota\_odb9 [17]."

**Table 1: The draft genome of *Paragonimus*: assembly, size and annotation characteristics**

| Statistic                                            | <i>Paragonimus miyazakii</i> | <i>Paragonimus heterotremus</i> | <i>Paragonimus kelicotti</i> | <i>Paragonimus westermani</i> (Japan) | <i>Paragonimus westermani</i> (India) |
|------------------------------------------------------|------------------------------|---------------------------------|------------------------------|---------------------------------------|---------------------------------------|
| <b>Assembly statistics</b>                           |                              |                                 |                              |                                       |                                       |
| Total genome length (Mb)                             | 915.8                        | 841.2                           | 696.5                        | 923.3                                 | 922.8                                 |
| Number of contigs                                    | 22,318                       | 27,557                          | 29,377                       | 22,477                                | 30,455                                |
| Mean contig size (kb)                                | 41                           | 30.5                            | 23.7                         | 41.1                                  | 30.3                                  |
| Median contig size (kb)                              | 15.1                         | 9.3                             | 10.2                         | 17.2                                  | 4.8                                   |
| Max. contig size (kb)                                | 919.8                        | 715.6                           | 826                          | 829                                   | 809.4                                 |
| N50 length (kb)                                      | 108.8                        | 92.5                            | 56.0                         | 100.8                                 | 135.2                                 |
| N50 number                                           | 2,320                        | 2,506                           | 3,316                        | 2,664                                 | 1,943                                 |
| <b>BUSCO completeness (303 genes, eukarota_odb9)</b> |                              |                                 |                              |                                       |                                       |
| Complete, single copy                                | 84.5%                        | 82.5%                           | 70.3%                        | 88.78%                                | 76.90%                                |
| Complete, duplicated                                 | 1.3%                         | 0.0%                            | 1.3%                         | 1.32%                                 | 2.31%                                 |
| Fragmented                                           | 7.6%                         | 10.9%                           | 15.2%                        | 6.27%                                 | 14.85%                                |
| Missing                                              | 6.6%                         | 6.6%                            | 13.2%                        | 3.63%                                 | 5.94%                                 |
| Overall completeness                                 | 93.4%                        | 93.4%                           | 86.8%                        | 96.37%                                | 94.06%                                |
| <b>Gene statistics</b>                               |                              |                                 |                              |                                       |                                       |
| Number of genes                                      | 12,652                       | 12,490                          | 12,853                       | 12,072                                | 12,771                                |

|                        |      |      |      |      |      |
|------------------------|------|------|------|------|------|
| Avg gene length (kb)   | 25.9 | 22.6 | 17.6 | 24.1 | 18.0 |
| Avg CDS length (kb)    | 1.5  | 1.4  | 1.1  | 1.4  | 1.4  |
| Avg intron length (kb) | 4.2  | 4    | 3.6  | 4.2  | 4.0  |
| Avg # exons per gene   | 6.7  | 6.2  | 5.3  | 6.3  | 5.2  |
| % annotated InterPro   | 82%  | 85%  | 81%  | 87%  | 82%  |
| % annotated KEGG       | 40%  | 41%  | 34%  | 43%  | 43%  |

2-4. On reviewing the methods, I could not find sufficient detail to rerun many of the analyses properly. I recommend that the authors provide a file with all the commands, options and software versions. This file serves two purposes. The first is so that replication of the work will support its robustness. The second is so that other researchers can implement these methods for their own species of interest.

Author response: Following the reviewer's recommendation, we have provided the complete commands and parameters used to perform the analyses as Supplementary Text S1.

We have also added the following text to indicate that this information is available:

**Sections: Methods, and 'Availability of supporting data and materials'**

"All relevant software versions, and commands specifying the parameters used are presented in **Supplementary Text S1.**"
