# Supplementary material for: Comparative genomics and transcriptomics of 4 Paragonimus species provide insights into lung fluke parasitism and pathogenesis
Source: PubMed Central journal article supplement (PMC7370270; doi:10.1093/gigascience/giaa073), 2020-07-20
Supplement: giaa073_giga-d-19-00411_revision_2.pdf [file giaa073_giga-d-19-00411_revision_2.pdf]

## Comparative genomics and transcriptomics of four *Paragonimus* species provide insights into lung fluke parasitism and pathogenesis

--Manuscript Draft--

|                             |                                                                                                                                                                                                                                                                                                                                                                                                                                                                                                                                                                                                                                                                                                                                                                                                                                                                                                                                                                                                                                                                                                                                                                                                                                                                                                                                                                                                                                                                                                                                                                                                                                                                                                                                                                                                                                               |                       |
|-----------------------------|-----------------------------------------------------------------------------------------------------------------------------------------------------------------------------------------------------------------------------------------------------------------------------------------------------------------------------------------------------------------------------------------------------------------------------------------------------------------------------------------------------------------------------------------------------------------------------------------------------------------------------------------------------------------------------------------------------------------------------------------------------------------------------------------------------------------------------------------------------------------------------------------------------------------------------------------------------------------------------------------------------------------------------------------------------------------------------------------------------------------------------------------------------------------------------------------------------------------------------------------------------------------------------------------------------------------------------------------------------------------------------------------------------------------------------------------------------------------------------------------------------------------------------------------------------------------------------------------------------------------------------------------------------------------------------------------------------------------------------------------------------------------------------------------------------------------------------------------------|-----------------------|
| <b>Manuscript Number:</b>   | GIGA-D-19-00411R2                                                                                                                                                                                                                                                                                                                                                                                                                                                                                                                                                                                                                                                                                                                                                                                                                                                                                                                                                                                                                                                                                                                                                                                                                                                                                                                                                                                                                                                                                                                                                                                                                                                                                                                                                                                                                             |                       |
| <b>Full Title:</b>          | Comparative genomics and transcriptomics of four <i>Paragonimus</i> species provide insights into lung fluke parasitism and pathogenesis                                                                                                                                                                                                                                                                                                                                                                                                                                                                                                                                                                                                                                                                                                                                                                                                                                                                                                                                                                                                                                                                                                                                                                                                                                                                                                                                                                                                                                                                                                                                                                                                                                                                                                      |                       |
| <b>Article Type:</b>        | Research                                                                                                                                                                                                                                                                                                                                                                                                                                                                                                                                                                                                                                                                                                                                                                                                                                                                                                                                                                                                                                                                                                                                                                                                                                                                                                                                                                                                                                                                                                                                                                                                                                                                                                                                                                                                                                      |                       |
| <b>Funding Information:</b> | National Institutes of Health - National Human Genome Research Institute (U54HG003079)                                                                                                                                                                                                                                                                                                                                                                                                                                                                                                                                                                                                                                                                                                                                                                                                                                                                                                                                                                                                                                                                                                                                                                                                                                                                                                                                                                                                                                                                                                                                                                                                                                                                                                                                                        | Dr. Makedonka Mitreva |
|                             | National Institutes of Health - National Institute of Allergy and Infectious Diseases (AI081803)                                                                                                                                                                                                                                                                                                                                                                                                                                                                                                                                                                                                                                                                                                                                                                                                                                                                                                                                                                                                                                                                                                                                                                                                                                                                                                                                                                                                                                                                                                                                                                                                                                                                                                                                              | Dr. Makedonka Mitreva |
|                             | National Institutes of Health - National Institute of General Medical Sciences (GM097435)                                                                                                                                                                                                                                                                                                                                                                                                                                                                                                                                                                                                                                                                                                                                                                                                                                                                                                                                                                                                                                                                                                                                                                                                                                                                                                                                                                                                                                                                                                                                                                                                                                                                                                                                                     | Dr. Makedonka Mitreva |
|                             | Thailand Research Fund (TH) - Distinguished Research Professor Grant (DPG6280002)                                                                                                                                                                                                                                                                                                                                                                                                                                                                                                                                                                                                                                                                                                                                                                                                                                                                                                                                                                                                                                                                                                                                                                                                                                                                                                                                                                                                                                                                                                                                                                                                                                                                                                                                                             | Dr. Wanchai Maleewong |
| <b>Abstract:</b>            | <p><b>Background</b></p> <p><i>Paragonimus</i> spp. (lung flukes) are among the most injurious food-borne helminths, infecting ~23 million people, (~293 million with infection risk). Paragonimiasis is acquired from infected undercooked crustaceans and primarily affects the lungs, but often causes lesions elsewhere including the brain. The disease is easily mistaken for tuberculosis due to similar pulmonary symptoms, and accordingly, diagnostics are in demand.</p> <p><b>Results</b></p> <p>We assembled, annotated and compared draft genomes of four prevalent and distinct <i>Paragonimus</i> species: <i>P. miyazakii</i>, <i>P. westermani</i>, <i>P. kellicotti</i> and <i>P. heterotremus</i>. Genomes ranged from 697 to 923 Mb, included 12,072 to 12,853 genes, and were 71.6% to 90.1% complete according to BUSCO. Orthologous group (OG) analysis spanning 21 species (lung, liver and blood flukes, additional platyhelminths and hosts) provided insights into lung fluke biology, including identifying 256 lung fluke-specific and conserved OGs enriched for iron acquisition, immune modulation and other parasite functions. Transcriptome analysis identified consistent adult-stage <i>Paragonimus</i> expression profiles, and previously identified <i>Paragonimus</i> diagnostic antigens were matched to genes, providing an opportunity to optimize and ensure pan-<i>Paragonimus</i>-reactivity for diagnostic assays.</p> <p><b>Conclusions</b></p> <p>This report provides advances in molecular understanding of <i>Paragonimus</i> and underpins future studies into the biology, evolution and pathogenesis of <i>Paragonimus</i> and related food-borne flukes. We anticipate that these novel genomic and transcriptomic resources will be invaluable for future lung fluke research.</p> |                       |

|                                                      |                                                                                                                                                                                                                                                                                                                                                                                                                                                                                                                                                                                                                                                                                                                                                                                                                                                                                                                                                                                                                                                                                                                                                                                                                                                                                                                       |
|------------------------------------------------------|-----------------------------------------------------------------------------------------------------------------------------------------------------------------------------------------------------------------------------------------------------------------------------------------------------------------------------------------------------------------------------------------------------------------------------------------------------------------------------------------------------------------------------------------------------------------------------------------------------------------------------------------------------------------------------------------------------------------------------------------------------------------------------------------------------------------------------------------------------------------------------------------------------------------------------------------------------------------------------------------------------------------------------------------------------------------------------------------------------------------------------------------------------------------------------------------------------------------------------------------------------------------------------------------------------------------------|
| <b>Corresponding Author:</b>                         | Makedonka Mitreva<br>UNITED STATES                                                                                                                                                                                                                                                                                                                                                                                                                                                                                                                                                                                                                                                                                                                                                                                                                                                                                                                                                                                                                                                                                                                                                                                                                                                                                    |
| <b>Corresponding Author Secondary Information:</b>   |                                                                                                                                                                                                                                                                                                                                                                                                                                                                                                                                                                                                                                                                                                                                                                                                                                                                                                                                                                                                                                                                                                                                                                                                                                                                                                                       |
| <b>Corresponding Author's Institution:</b>           |                                                                                                                                                                                                                                                                                                                                                                                                                                                                                                                                                                                                                                                                                                                                                                                                                                                                                                                                                                                                                                                                                                                                                                                                                                                                                                                       |
| <b>Corresponding Author's Secondary Institution:</b> |                                                                                                                                                                                                                                                                                                                                                                                                                                                                                                                                                                                                                                                                                                                                                                                                                                                                                                                                                                                                                                                                                                                                                                                                                                                                                                                       |
| <b>First Author:</b>                                 | Bruce A Rosa                                                                                                                                                                                                                                                                                                                                                                                                                                                                                                                                                                                                                                                                                                                                                                                                                                                                                                                                                                                                                                                                                                                                                                                                                                                                                                          |
| <b>First Author Secondary Information:</b>           |                                                                                                                                                                                                                                                                                                                                                                                                                                                                                                                                                                                                                                                                                                                                                                                                                                                                                                                                                                                                                                                                                                                                                                                                                                                                                                                       |
| <b>Order of Authors:</b>                             | Bruce A Rosa<br>Young-Jun Choi<br>Samantha N McNulty<br>Hyeim Jung<br>John Martin<br>Takeshi Agatsuma<br>Hiromu Sugiyama<br>Thanh Le Hoa<br>Pham Ngoc Doanh<br>Wanchai Maleewong<br>David Blair<br>Paul J. Brindley<br>Peter U. Fischer<br>Makedonka Mitreva                                                                                                                                                                                                                                                                                                                                                                                                                                                                                                                                                                                                                                                                                                                                                                                                                                                                                                                                                                                                                                                          |
| <b>Order of Authors Secondary Information:</b>       |                                                                                                                                                                                                                                                                                                                                                                                                                                                                                                                                                                                                                                                                                                                                                                                                                                                                                                                                                                                                                                                                                                                                                                                                                                                                                                                       |
| <b>Response to Reviewers:</b>                        | GIGA-D-19-00411R1<br><br>Point-by Point Response to editor and reviewers' comments<br><br>Editor:<br><br>We appreciate your email and your reasons for keeping this as a Research paper; however, we strongly suggest that this falls within our Data Note criteria - as the analysis you present is the validation that we ask for in a Data Note. So with this round of review, I'd like you to consider Reviewer #2's comments, as well as ours, and decide whether to change this into a Data Note or keep it as Research - removing the RNA-seq data for the specie, P. miyazakii.<br><br>Response:<br><br>We have completely removed the cavity vs tissue RNAseq analysis for the species, P. miyazakii. RNAseq analyses of the other species are presented in relevant sections. The key analyses include: i) validation of gene expression of all lung fluke-specific and conserved orthologous protein families (highly relevant analysis related to evolutionary adaptations in the genus Paragonimus), and ii) characterization of orthology among genes across this genus. The outcome confirmed consistent levels of expression of adult-stage genes supported by high Pearson correlations values.<br><br>Editor:<br><br>I would also like to point out that our Data Notes are indexed the same way as |

Research papers, and they are also half the cost of publishing a Research paper. If you choose to keep your paper as Research, we will however have to send it for a third round of review with an Editorial Board member.

Response:

With regard to the suggestion to reassign the manuscript to Data Note, we have re-reviewed the scope of both manuscript types. The 'Research Article' type is for "Manuscripts containing more detailed biological, medical or technical analyses of data" whereas Data Notes "focus on a particular dataset, and provide detailed methodology on data production, validation, and potential reuse." The rationale and findings of our manuscript are clearly within the ambit of the journal's Research Article, and indeed better fit there than in the Data Note section. By contrast, the Data Note type is intended "to incentivize and more rapidly release data before subsequent detailed analysis has been carried out." Specifically, this is because we first strategically choose four species spanning the genus *Paragonimus* to facilitate the presented analysis. Hence, in addition of presenting four novel genomes of neglected tropical disease pathogens, and transcriptomes for three of the species, we undertook detailed technical comparative analyses for four species of *Paragonimus* (lung flukes) and 17 other phylogenetically relevant species. The endeavor revealed key evolutionary genetic changes underlying diversification with the genus *Paragonimus* (e.g., gene family evolution and positive selection), which has provided novel biological knowledge about the tissue tropism of these medically important pathogens, which are among the most injurious food-borne helminths, infecting ~23 million people, with ~293 million people at risk for infection. Furthermore, the disease is frequently misdiagnosed as tuberculosis due to similar pulmonary symptoms (and maybe even for COVID-19), so there is an urgent need for the development of effective diagnostics. Because we strategically selected to sequence and analyze these 4 species that span the genus *Paragonimus*, we were able to match the new gene sets to previously identified single species-based *Paragonimus* diagnostic antigens, providing an opportunity to optimize and ensure consistent cross-reactivity for diagnostic assays, which is of a direct clinical. Thus, we have performed a thorough and extensive analysis of the available datasets for *Paragonimus* to provide insights of biological and clinical relevance. The manuscript provides far, far more than (to paraphrase the Data Note type) 'a rapid release of a novel dataset that we wish to incentivize'.

Reviewer 1:

The group answered all questions posted before and made the changes properly to make the manuscript more clear. Just two minor points:

1.1. Line 429 - maybe a typo. I believe that the author wanted to mention "Ncmer" instead of "Nucmerum";

Response: This has been fixed.

1.2. Line 394 - The authors reported well why they use PBJelly, but my point is that PBJELLY is not an assembler. " For *P. kellicotti*, PacBio were assembled using PBJelly". PBJelly, is a polishing tool to upgrade draft assemblies. Using it was correct, but the word assembler should be removed.

Response: This has been fixed.

Reviewer 2:

2.1. I thank the authors for the detailed response to my concerns. Regarding the RNA-Seq data, I appreciate that these samples are precious. However, that does not compensate for the lack biological replicates. If insufficient material cannot be obtained than the experiment should be considered. I am unable to support the strategy to consider the pleural and two peritoneal samples as replicates for the "cavities", nor lung and liver to be considered replicates for "tissues". Figure S4 doesn't provide strong support for this division; the pearson correlation values are nearly identical for peritoneal B vs peritoneal A (0.93), as peritoneal A vs lung (0.92). Even if one were to

|                                                                                                                                                                                                                                                                                                                                                                                                                                    |                                                                                                                                                                                                                                                                                                                                                                                                                                                                                                                                                                                                                                                                                                                                                                                                                                                                                                                                                                                                                                                                                                                                                                                                                                                                                                                                                                                                                                                                                                                                                                                                                                                                                                                                                                                                                                                                                                                                                                                                           |
|------------------------------------------------------------------------------------------------------------------------------------------------------------------------------------------------------------------------------------------------------------------------------------------------------------------------------------------------------------------------------------------------------------------------------------|-----------------------------------------------------------------------------------------------------------------------------------------------------------------------------------------------------------------------------------------------------------------------------------------------------------------------------------------------------------------------------------------------------------------------------------------------------------------------------------------------------------------------------------------------------------------------------------------------------------------------------------------------------------------------------------------------------------------------------------------------------------------------------------------------------------------------------------------------------------------------------------------------------------------------------------------------------------------------------------------------------------------------------------------------------------------------------------------------------------------------------------------------------------------------------------------------------------------------------------------------------------------------------------------------------------------------------------------------------------------------------------------------------------------------------------------------------------------------------------------------------------------------------------------------------------------------------------------------------------------------------------------------------------------------------------------------------------------------------------------------------------------------------------------------------------------------------------------------------------------------------------------------------------------------------------------------------------------------------------------------------------|
|                                                                                                                                                                                                                                                                                                                                                                                                                                    | <p>ignore this, there remains the problem that "tissues" has only two replicates. Further, single samples are used to make claims as to expression, for example in line 302 and table 4. My resolute stance on the shortcomings of this analysis, is because the work presented will be cited by others with confidence and may lead to a snow-balling of over-interpretation that can have significant and negative impact on research into these important parasites. Due to the problems I list, I recommend that the expression section is removed from the analysis.</p> <p>Response: The RNAseq analysis of the cavities vs tissue of <i>P. miyazakii</i> has been removed.</p> <p>2.2. Regarding the measures of completeness, I thank the authors for providing more details. I agree with their use of the eukaryotic set of conserved genes in BUSCO. I disagree with the claim that "fragmented" genes "may or may not be considered complete." I challenge the authors to provide published examples of this. The paper on the <i>Heterohabditis</i> genome does also use the eukaryote set, but does not claim fragmented genes are complete. The authors, in their response, offer <i>S. mansoni</i>'s completeness of 73.8% as a comparison. In Wormbase-Parasite, all of the <i>Schistosoma</i> species have relative low scores on both CEGMA and BUSCO. It has been hypothesised that the blood flukes have lost a suite of genes previously thought to be highly conserved. Perhaps more impressive for the presented <i>Paragonimus</i> assemblies is the low proportion of duplicated complete genes. This suggests a low level of mis-assembly due to heterozygosity. I strongly encourage the authors to remove the fragmented genes from this "overall completeness" score in Table 1 and throughout the text.</p> <p>Response: We have modified the R2 text along the lines suggested by the reviewer. We also removed the "overall completeness" category from the Table 1.</p> |
| <b>Additional Information:</b>                                                                                                                                                                                                                                                                                                                                                                                                     |                                                                                                                                                                                                                                                                                                                                                                                                                                                                                                                                                                                                                                                                                                                                                                                                                                                                                                                                                                                                                                                                                                                                                                                                                                                                                                                                                                                                                                                                                                                                                                                                                                                                                                                                                                                                                                                                                                                                                                                                           |
| <b>Question</b>                                                                                                                                                                                                                                                                                                                                                                                                                    | <b>Response</b>                                                                                                                                                                                                                                                                                                                                                                                                                                                                                                                                                                                                                                                                                                                                                                                                                                                                                                                                                                                                                                                                                                                                                                                                                                                                                                                                                                                                                                                                                                                                                                                                                                                                                                                                                                                                                                                                                                                                                                                           |
| Are you submitting this manuscript to a special series or article collection?                                                                                                                                                                                                                                                                                                                                                      | No                                                                                                                                                                                                                                                                                                                                                                                                                                                                                                                                                                                                                                                                                                                                                                                                                                                                                                                                                                                                                                                                                                                                                                                                                                                                                                                                                                                                                                                                                                                                                                                                                                                                                                                                                                                                                                                                                                                                                                                                        |
| <p><b>Experimental design and statistics</b></p> <p>Full details of the experimental design and statistical methods used should be given in the Methods section, as detailed in our <a href="#">Minimum Standards Reporting Checklist</a>. Information essential to interpreting the data presented should be made available in the figure legends.</p> <p>Have you included all the information requested in your manuscript?</p> | Yes                                                                                                                                                                                                                                                                                                                                                                                                                                                                                                                                                                                                                                                                                                                                                                                                                                                                                                                                                                                                                                                                                                                                                                                                                                                                                                                                                                                                                                                                                                                                                                                                                                                                                                                                                                                                                                                                                                                                                                                                       |
| <p><b>Resources</b></p> <p>A description of all resources used, including antibodies, cell lines, animals and software tools, with enough information to allow them to be uniquely identified, should be included in the</p>                                                                                                                                                                                                       | Yes                                                                                                                                                                                                                                                                                                                                                                                                                                                                                                                                                                                                                                                                                                                                                                                                                                                                                                                                                                                                                                                                                                                                                                                                                                                                                                                                                                                                                                                                                                                                                                                                                                                                                                                                                                                                                                                                                                                                                                                                       |

|                                                                                                                                                                                                                                                                                                                                                                                                                                                                                                                                                         |            |
|---------------------------------------------------------------------------------------------------------------------------------------------------------------------------------------------------------------------------------------------------------------------------------------------------------------------------------------------------------------------------------------------------------------------------------------------------------------------------------------------------------------------------------------------------------|------------|
| <p>Methods section. Authors are strongly encouraged to cite <a href="#">Research Resource Identifiers</a> (RRIDs) for antibodies, model organisms and tools, where possible.</p> <p>Have you included the information requested as detailed in our <a href="#">Minimum Standards Reporting Checklist</a>?</p>                                                                                                                                                                                                                                           |            |
| <p><b>Availability of data and materials</b></p> <p>All datasets and code on which the conclusions of the paper rely must be either included in your submission or deposited in <a href="#">publicly available repositories</a> (where available and ethically appropriate), referencing such data using a unique identifier in the references and in the “Availability of Data and Materials” section of your manuscript.</p> <p>Have you have met the above requirement as detailed in our <a href="#">Minimum Standards Reporting Checklist</a>?</p> | <p>Yes</p> |

1 **Comparative genomics and transcriptomics of four *Paragonimus* species provide insights into lung**  
2 **fluke parasitism and pathogenesis**

3 Bruce A. Rosa<sup>1\*</sup>, Young-Jun Choi<sup>1\*</sup>, Samantha N. McNulty<sup>2</sup>, Hyeim Jung<sup>1</sup>, John Martin<sup>1</sup>, Takeshi Agatsuma<sup>3</sup>,  
4 Hiromu Sugiyama<sup>4</sup>, Thanh Le Hoa<sup>5</sup>, Pham Ngoc Doanh<sup>6,7</sup>, Wanchai Maleewong<sup>8</sup>, David Blair<sup>9</sup>, Paul J. Brindley<sup>10</sup>,  
5 Peter U. Fischer<sup>1</sup>, Makedonka Mitreva<sup>1,2†</sup>

6 <sup>1</sup>Department of Internal Medicine, Washington University School of Medicine, St. Louis, MO 63110, USA

7 <sup>2</sup>The McDonnell Genome Institute at Washington University, School of Medicine, St. Louis, MO 63108, USA

8 <sup>3</sup>Department of Environmental Health Sciences, Kochi Medical School, Oko, Nankoku City, Kochi 783-8505,  
9 Japan

10 <sup>4</sup>Laboratory of Helminthology, Department of Parasitology, National Institute of Infectious Diseases, Tokyo 162-  
11 8640, Japan

12 <sup>5</sup>Department of Immunology, Institute of Biotechnology, Vietnam Academy of Science and Technology, Hanoi,  
13 Vietnam

14 <sup>6</sup>Institute of Ecology and Biological Resources, Vietnam Academy of Science and Technology, Hanoi, Vietnam

15 <sup>7</sup>Graduate University of Science and Technology, Vietnam Academy of Science and Technology, Hanoi, Vietnam

16 <sup>8</sup>Research and Diagnostic Center for Emerging Infectious Diseases, Khon Kaen University, Khon Kaen,  
17 Thailand, Department of Parasitology, Faculty of Medicine, Khon Kaen University, Khon Kaen, Thailand

18 <sup>9</sup>College of Marine and Environmental Sciences, James Cook University, Townsville, Queensland 4811,  
19 Australia

20 <sup>10</sup>Departments of Microbiology, Immunology and Tropical Medicine, and Research Center for Neglected  
21 Diseases of Poverty, and Pathology School of Medicine & Health Sciences, George Washington University,  
22 Washington, DC 20037, USA

23 \*Authors contributed equally to this work

24 †Correspondence should be addressed to Makedonka Mitreva. Tel. +1-314-285-2005,

25 Fax +1-314-286-1800, Email: [mmitreva@wustl.edu](mailto:mmitreva@wustl.edu)

26

27

28 **Emails:**

29 Bruce A. Rosa: [barosa@wustl.edu](mailto:barosa@wustl.edu)

30 Young-Jun Choi: [choi.y@wustl.edu](mailto:choi.y@wustl.edu)

31 Samantha N. McNulty: [samantha.n.mcnulty@gmail.com](mailto:samantha.n.mcnulty@gmail.com)

32 Hyeim Jung: [jungh@wustl.edu](mailto:jungh@wustl.edu)

33 John Martin: [jmartin@wustl.edu](mailto:jmartin@wustl.edu)

34 Takeshi Agatsuma: [agatsuma@kochi-u.ac.jp](mailto:agatsuma@kochi-u.ac.jp)

35 Hiromu Sugiyama: [hsugi@niid.go.jp](mailto:hsugi@niid.go.jp)

36 Thanh Le Hoa: [imibtvn@gmail.com](mailto:imibtvn@gmail.com)

37 Pham Ngoc Doanh: [pndoanh@yahoo.com](mailto:pndoanh@yahoo.com)

38 Wanchai Maleewong: [wanch\\_ma@kku.ac.th](mailto:wanch_ma@kku.ac.th)

39 David Blair: [david.blair@jcu.edu.au](mailto:david.blair@jcu.edu.au)

40 Paul J. Brindley: [pbrindley@gwu.edu](mailto:pbrindley@gwu.edu)

41 Peter U. Fischer: [pufischer@wustl.edu](mailto:pufischer@wustl.edu)

42 Makedonka Mitreva: [mmitreva@wustl.edu](mailto:mmitreva@wustl.edu)

43

44 **Keywords**

45 Lung flukes, genomics, transcriptomics, paragonimiasis, infectious disease, trematodes

46

47

48

49

50

51

52

53

54

55

56 **Abstract**

57 Background

58 *Paragonimus* spp. (lung flukes) are among the most injurious food-borne helminths, infecting ~23 million people,  
59 (~293 million with infection risk). Paragonimiasis is acquired from infected undercooked crustaceans and  
60 primarily affects the lungs, but often causes lesions elsewhere including the brain. The disease is easily mistaken  
61 for tuberculosis due to similar pulmonary symptoms, and accordingly, diagnostics are in demand.

62 Results

63 We assembled, annotated and compared draft genomes of four prevalent and distinct *Paragonimus* species: *P.*  
64 *miyazakii*, *P. westermani*, *P. kellicotti* and *P. heterotremus*. Genomes ranged from 697 to 923 Mb, included  
65 12,072 to 12,853 genes, and were 71.6% to 90.1% complete according to BUSCO. Orthologous group (OG)  
66 analysis spanning 21 species (lung, liver and blood flukes, additional platyhelminths and hosts) provided insights  
67 into lung fluke biology, including identifying 256 lung fluke-specific and conserved OGs enriched for iron  
68 acquisition, immune modulation and other parasite functions. Transcriptome analysis identified consistent adult-  
69 stage *Paragonimus* expression profiles, and previously identified *Paragonimus* diagnostic antigens were  
70 matched to genes, providing an opportunity to optimize and ensure pan-*Paragonimus*-reactivity for diagnostic  
71 assays.

72 Conclusions

73 This report provides advances in molecular understanding of *Paragonimus* and underpins future studies into the  
74 biology, evolution and pathogenesis of *Paragonimus* and related food-borne flukes. We anticipate that these  
75 novel genomic and transcriptomic resources will be invaluable for future lung fluke research.

76

77

78

79

80

81



## 82 **Background**

83 The trematode genus *Paragonimus*, the lung flukes, is among the most injurious taxon of food-borne  
84 helminths. About 23 million people are infected with lung flukes [1], an estimated 292 million people are at-risk,  
85 mainly in eastern Asia [2] , and billions of people live in areas where *Paragonimus* infections of animals are endemic.  
86 The life-cycle of *Paragonimus* species involves freshwater snails, crustacean intermediate hosts and mammals in  
87 Asia, parts of Africa, and the Americas [3]. Human paragonimiasis is acquired by consuming raw or undercooked  
88 shrimp and crabs containing the metacercaria, which is the infective stage. Although primarily affecting the lungs,  
89 lesions can occur at other sites, including the brain [4], and pulmonary paragonimiasis is frequently mistaken for  
90 tuberculosis due to similar respiratory symptoms [4].

91 Pathogenesis ensues because of the migration of the newly invading juveniles from the gut to the lungs  
92 and through not-infrequent ectopic migration to the brain, reproductive organs, and subcutaneous sites at the  
93 extremities, and because of toxins and other mediators released by the parasites during the larval migration [4,  
94 5]. The presence of the flukes in the lung causes hemorrhage, inflammation with leukocytic infiltration and  
95 necrosis of lung parenchyma that gradually proceeds to the development of fibrotic encapsulation except for a  
96 fistula from the evolving lesion to the respiratory tract. Eggs of the lung fluke exit the encapsulated lesion through  
97 the fistula to reach the sputum and/or feces of the host, where they pass to the external environment,  
98 accomplishing transmission of the parasite [6]. There are signs and symptoms that allow characterization of  
99 acute and chronic stages of paragonimiasis. In pulmonary paragonimiasis, for example, the most noticeable  
100 clinical symptom of an infected individual is a chronic cough with gelatinous, rusty brown, pneumonia-like, blood-  
101 streaked sputum [6]. Heavy work commonly induces hemoptysis. Pneumothorax, empyema from secondary  
102 bacterial infection and pleural effusion might also be presented. When symptoms include only a chronic cough,  
103 the disease may be misinterpreted as chronic bronchitis and bronchiectasis or bronchial asthma. Pulmonary  
104 paragonimiasis is frequently confused with pulmonary tuberculosis [7]. The symptoms of extra-pulmonary  
105 paragonimiasis vary depending on the location of the fluke, including cerebral [5] and abdominal paragonimiasis  
106 [6].

107 *Paragonimus* is a large genus that includes more than 50 nominal species [8]. Seven of these species or  
108 species complexes of *Paragonimus* are known to infect humans [3]. This is also an ancient genus, thought to have  
109 originated before the breakup of Gondwana [9], but possibly also dispersing as colonists from the original East

110 Asian clade, based on the distribution of host species [10]. To improve our understanding of pathogens across  
111 this genus at the molecular level, we have assembled, annotated and compared draft genomes of four of these,  
112 three from Asia (*P. westermani* from Japan, *P. heterotremus*, *P. miyazakii*) and one from North America (*P.*  
113 *kelllicotti*). Among them, *P. westermani* is the best-known species causing pulmonary paragonimiasis. This name  
114 has been applied to a genetically and geographically diverse complex of lung fluke populations differing widely in  
115 biological features including infectivity to humans [11]. The complex extends from India and Sri Lanka eastwards to  
116 Siberia, Korea and Japan, and southwards into Vietnam, Indonesia and the Philippines. However, human infections  
117 are reported primarily from China, Korea, Japan and the Philippines. Until this study, an Indian member of the *P.*  
118 *westermani* complex was the only lung fluke species for which a genome sequence was available [12].  
119 *Paragonimus heterotremus* is the most common cause of pulmonary paragonimiasis in southern China, Lao PDR,  
120 Vietnam, northeastern India and Thailand [6, 8]. *Paragonimus miyazakii* is a member of the *P. skrjabini* complex,  
121 to which Blair and co-workers accorded sub-specific status [13]. Flukes of this complex tend not to mature in  
122 humans but frequently cause ectopic disease at diverse sites, including the brain. In North America, infection with  
123 *P. kelllicotti* is primarily a disease of native, crayfish-eating mammals including the otter and mink. The occasional  
124 human infections can be severe, and thoracic involvement is typical [14, 15].

125         These four species represent a broad sampling of the phylogenetic diversity of the genus. Most of the  
126 known diversity, as revealed by DNA sequences from portions of the mitochondrial genome and the nuclear  
127 ribosomal genes, resides in Asia [16]. Analysis of the ITS2 marker by Blair et al [16] indicates that each of the  
128 species sequenced occupies a distinct clade within the phylogenetic tree.

129         In addition to a greater understanding of the genome contents of this group of food-borne trematodes, the  
130 findings presented here provide new information to assist development of diagnostic tools and recognition of  
131 potential drug targets. The findings will facilitate evolutionary, zoogeographical and phylogenetic investigation of the  
132 genus *Paragonimus* and its host-parasite relationships through the comparative analysis of gene content relative to  
133 other sequenced platyhelminth and host species, and to known *Paragonimus* diagnostic antigen targets.

## Results and Discussion

### Genome features

The sizes of the four novel *Paragonimus* genomes range from 697 to 923 Mb, containing between 12,072 and 12,853 genes. These draft genomes are estimated to be between 71.6% and 90.1% complete, according to the number of complete BUSCO eukaryote genes (single-copy or duplicate) [17], with the new *P. westermani* genome produced from a sample collected from Japan being more complete than the previously-sequenced genome produced from a sample collected from India [12] (90.1% vs 70.2%, respectively; **Table 1**). Here, statements about *P. westermani* apply to the new Japanese genome, unless otherwise stated. The total genome lengths of the *Paragonimus* spp. are larger than those of the Schistosomatidae and Opisthorchiidae, but smaller than those of Fasciolidae. However, the total numbers of protein-coding genes are comparable (**Table 1**). Repetitive sequences occupy between 49% and 54% of the *Paragonimus* genomes (**Figure 1A**). The repeat landscapes, depicting the relative abundance of repeat classes in the genome, versus the Kimura divergence from the consensus, revealed that *P. kellicotti* in particular has a significant number of copies of transposable elements (TE) with high similarity to consensus (Kimura substitution level: 0-5), indicating recent and current TE activity (**Figure 1B**). In a recent study [18], TE activity in the Fasciolidae was found to be low. TEs are potent sources of mutation that can rapidly create genetic variance, especially following genetic bottlenecks and environmental changes, providing bursts of allelic and phenotypic diversity upon which selection can act [19, 20]. Therefore, changes in TE activity, modulated by environmentally induced physiological or genomic stress, may have a major effect on adaptation of populations and species facing novel habitats and large environmental perturbations [21].

Focusing on the gene content, *P. kellicotti* had the shortest average total gene length among the species, and the lung flukes overall had similar gene lengths to other flukes, while platyhelminth species other than trematodes have shorter genes overall (**Figure 2A**). The variability in gene lengths observed between species results from differences in both average intron lengths (**Figure 2B**) and the average number of exons per gene (**Figure 2C**) while the average coding sequence (CDS) lengths of the exons across all the platyhelminth species were similar to each other (**Figure 2D**). Whereas there was species-to-species variability in gene lengths and exon counts, consistent patterns among the types of flukes were not apparent. Some of this variability may have

165 arisen due to the variation in quality of the assemblies, but these differences were minimized by only using  
166 complete gene models with a start and stop codon identified in the same frame.

167 Mitochondrial whole genome-based clustering was performed for the four *Paragonimus* species plus  
168 some additional existing mitochondrial genome assemblies for *P. ohirai* and four for *P. westermani*, including  
169 previously-sequenced mitochondrial genomes of *Paragonimus* (**Figure 3A**). This indicated that our Japanese *P.*  
170 *westermani* sample clustered with the existing known *P. westermani* samples from eastern Asia, and that all the  
171 other three newly sequenced species were distinct from *P. ohirai*.

172 We generated a PacBio long-read based mitochondrial assembly for *P. kellicotti*. The fully circularized  
173 complete genome was 17.3 kb in length, including a 3.7 kb non-coding repeat region between *tRNA<sup>Gly</sup>* and *cox3*  
174 (**Supplementary Figure S1**). There are seven copies of long repeats (378 bp) and 9.5 copies of short repeats  
175 (111 bp). The long repeats overlap with six copies of *tRNA<sup>Glu</sup>*. This structural organization of repeat sequences  
176 does not resemble those found in *Paragonimus ohirai* [12] and *P. westermani* [12] where the non-coding region  
177 is partitioned by *tRNA<sup>Glu</sup>* into two parts.

178 Clustering of the four new lung fluke genomes, four liver fluke genomes, three blood fluke genomes, five  
179 other platyhelminth species, four host species and a yeast outgroup was performed based on the shared  
180 phylogeny among orthologous protein groups. These findings mirrored the mitochondrial clustering results for  
181 the lung fluke species (**Figure 3B**), indicating that *P. westermani* is the earlier-diverging taxon, as previously  
182 suggested based on ribosomal RNA [22].

183 Although our *P. westermani* reference genome was assembled using samples collected from Japan  
184 (Amakusa, Kyusyu). We compared the genomic sequences of our East Asian *P. westermani* to the recently  
185 published *P. westermani* genome from India (Changlang, Arunachal Pradesh) [12] to estimate the genetic  
186 divergence between geographically diverse samples. This analysis identified an average nucleotide sequence  
187 identity of 87.6%.

### 188 Gene-family dynamics identify expanded functions distinguishing lung fluke species

189 We investigated large-scale differences in gene complements among families of digenetic trematodes  
190 (**Figure 4A**) and modeled gene gain and loss while accounting for the phylogenetic history of species [23]. Gene  
191 families of interest that displayed pronounced differential expansion or contraction (**Figure 4B**) included the  
192

193 papain-family cysteine proteases, cathepsins L, B and F, dynein heavy chain, spectrin/dystrophin, heat shock  
194 70 kDa protein, major vault protein, and multidrug resistance protein. Total protease and protease inhibitor  
195 counts are shown in **Figure 4C**. Cathepsin F genes may have roles in nutrient digestion and remodeling of other  
196 physiologically active molecules, and Ahn et al. [24] reported differential expression of cathepsin F genes during  
197 development of *P. westermani*, and showed that most are highly immunogenic. This flagged them as prospective  
198 diagnostic targets. The importance of cathepsin F for *Paragonimus* contrasts with its function in the fasciolids,  
199 where cathepsin L genes are expanded and are thought to play a more critical role in host invasion [18, 25].

200 Differential expansion of cytoskeletal molecules is of interest in the context of tegument physiology [26].  
201 Dynein is a microtubule motor protein, which transports intracellular cargo. Spectrin is an actin-binding protein,  
202 with a key role in maintenance of integrity of the plasma membrane. Dystrophin links microfilaments with  
203 extracellular matrix. The syncytial tegument of the surface of flatworms is a complex structure and a major  
204 adaptation to parasitism, and plays critical roles in nutrient uptake, immune response modulation and evasion,  
205 and other processes [26].

206 In *Paragonimus* spp., expanded gene families included heat shock proteins (HSPs), major vault proteins,  
207 and multidrug resistance proteins that play roles in maintaining cellular homeostasis under stress conditions.  
208 HSPs of flatworm parasites play a key role as molecular chaperones in the maintenance of protein homeostasis.  
209 They also are immunogenic and immunomodulatory. HSP is the most abundant family of proteins in the immature  
210 and mature egg of *Schistosoma mansoni*, and in the miracidium [27] and is highly abundant in the tegument of  
211 the adult schistosome [28]. In addition, HSP is abundant in the excretory/secretory products of the adult  
212 *Schistosoma japonicum* blood fluke [29]. HSP stimulates diverse immune cells, eliciting release of pro- and anti-  
213 inflammatory cytokines [30], binds human LDL (the purpose of which is unknown but may be associated with  
214 transport of apoprotein B or in lipid trafficking [31]) and, given these properties, HSP represents a promising  
215 vaccine and diagnostic candidate [32]. Vaults, ribonucleoprotein complexes, are highly conserved in eukaryotes.  
216 Although their exact function remains unclear, it may be associated with multidrug resistance phenotypes and  
217 with signal transduction. In *S. mansoni*, up-regulation of major vault protein has been observed during the  
218 transition from cercaria to schistosomulum and in praziquantel-resistant adult worms [33]. ATP-binding cassette  
219 transporters (ABC transporters) are essential components of cellular physiological machinery, and some ABC

220 transporters, including P-glycoproteins, pump toxins and xenobiotics out of the cell. Overexpression of P-  
221 glycoprotein has been reported in a praziquantel-resistant *S. mansoni* [34].

### 222 223 Tetraspanin sequence evolution in *P. kellicotti*

224 We searched for genes that evolved under positive selection in the four *Paragonimus* spp. based on the  
225 non-synonymous to synonymous substitution rate ratio ( $d_N/d_S$ ). We conducted the branch-site test of positive  
226 selection to identify adaptive gene variants that became fixed in each species [35] (**Supplementary Table S3**).  
227 A tetraspanin from *P. kellicotti* (PKEL\_00573) reached statistical significance after correction for multiple testing  
228 ( $d_N/d_S = 9.9$ , FDR = 0.018). Tetraspanins are small integral proteins bearing four transmembrane domains which  
229 form two extracellular loops [36]. In trematodes, they are major components of the tegument at the host-parasite  
230 interface [37], are highly immunogenic vaccine antigens [38, 39], and may play a role in immune evasion [40]. In  
231 the tetraspanin sequence of *P. kellicotti*, we detected six amino acid sites under positive selection  
232 (**Supplementary Figure S2**). Five of the six sites were predicted to be located within the extracellular loops  
233 believed to interact with the immune system of the host. A similar pattern of positive selection within regions that  
234 code for extracellular loops has been reported in tetraspanin-23 from African *Schistosoma* species [41].

### 235 236 Gene phylogeny analysis identifies functions conserved and specific to fluke groups

237 We classified orthologous groups (OGs) based on phelogenetic distribution of proteins from each of the  
238 21 species (**Figure 3B**). Complete gene counts and lists per species and per OG are provided in **Supplementary**  
239 **Table S4**. These results were parsed to identify the OGs containing members among the platyhelminth species,  
240 and those that were conserved across all members of each group (lung, liver, and blood flukes, and other  
241 platyhelminth species (**Figure 5A**). This analysis identified 256 OGs that were conserved among, and exclusive  
242 to, the lung flukes (**Figures 5A and 5B**). The lung fluke-conserved and -specific genes were significantly  
243 enriched for several gene ontology (GO) terms (**Table 2**; using *P. miyazakii* genes to test significance), most of  
244 which were related to peptidase activity (including serine proteases which are involved in host tissue invasion,  
245 anticoagulation, and immune evasion [42]), as well as “iron binding” (which may be related to novel iron  
246 acquisition mechanisms from host tissue, which is not well understood in most metazoan parasites, but has been  
247 described in schistosomes [43]). Lung (adult) stage RNA-Seq datasets were collected for each of the four lung

248 fluke species (accessions in **Supplementary Table S1**), and reads were mapped to each of their respective  
249 genomes. Based on the 1:1 gene orthologs (as defined by the previously described OG dataset), the orthologous  
250 genes across the lung flukes had consistent adult-stage gene expression levels, with Pearson correlations  
251 ranging from 0.72 to 0.85 (**Figure 6A, 6B**).

252 Expansion of unique aspartic proteases (including those predicted to be retropepsins) and other  
253 peptidases in the lung flukes may be associated with digestion of ingested blood, given the key role of this  
254 category of hydrolases and their inhibitors in nutrition and digestion of hemoglobin by schistosomes, and indeed  
255 other blood-feeding worms including hookworms [44, 45]. Given that pulmonary hemorrhage and hemoptysis  
256 are cardinal signs of lung fluke infection, it can be anticipated that the lung flukes ingest host blood when localized  
257 at the ulcerous lesion induced in the pulmonary parenchyma by infection. Overall, protease counts across  
258 species were similar (**Figure 4C**) although *P. kellicotti* had substantially fewer protease inhibitors compared to  
259 the other *Paragonimus* species (34 vs 57, 62 and 66), *F. hepatica* (61) and *S. mansoni* (55). Protease inhibitors  
260 in flukes are thought to be important for creating a safe environment for the parasite inside the host by inhibiting  
261 and regulating protease activity and immunomodulation [91], so this may suggest a novel host interaction  
262 strategy by *P. kellicotti*.

263 Analysis of the adult-stage gene expression levels of the discrete protease classes (**Supplementary**  
264 **Figure S3**) did not identify substantial differences among the *Paragonimus* species, except for a lower  
265 expression of threonine proteases in *P. kellicotti*. During the adult stage, cysteine proteases in all *Paragonimus*  
266 species exhibited significantly higher expression overall compared to *F. hepatica*, but similar expression levels  
267 to *S. mansoni*. A previous study identified immunodominant excretory-secretory cysteine proteases of adult  
268 *Paragonimus westermani* involved in immune evasion [46] and another study identified critical roles for  
269 excretory-secretory cysteine proteases during tissue invasion by newly excysted metacercariae of *P. westermani*  
270 [47]. The rapid diversification and critical host-interaction functions of the proteases highlights their importance,  
271 both in terms of understanding *Paragonimus* biology and in terms of identifying targets for control.

272 Functional enrichment analysis among the lung, liver and blood fluke conserved-and-exclusive OGs  
273 (**Figure 5C**) indicated that each family of fluke has evolved a distinct set of aspartic peptidases, trematode  
274 eggshell synthesis genes and saposin-like genes (which interact with lipids and are strongly immunogenic during  
275 fascioliasis [48]). The lung flukes, meanwhile, have uniquely expanded sets of serine proteases, as well as other

276 genes families with functions including FAR1 DNA binding (a class of proteins which are important secreted  
277 host-interacting proteins in some parasitic nematodes [49]), fatty-acid binding, and ferritin-like functions  
278 (intracellular proteins involved in iron metabolism, localized in vitelline follicles and eggs [50]).

### 280 Treatments, vaccine targets and diagnostics

281 The World Health Organization (WHO) currently recommends the use of praziquantel or, as a backup,  
282 triclabendazole for the treatment of paragonimiasis; both are highly effective for curing infections [51]. However,  
283 there are concerns about the development of resistance to these drugs; triclabendazole resistance of *P.*  
284 *westermani* was reported in a human case from Korea [52]. Furthermore, there is widespread resistance to  
285 triclabendazole in liver flukes in cattle in Australia and South America [53], and praziquantel resistance is  
286 anticipated in the future due to its widespread use as a single treatment for schistosomiasis, a worrisome  
287 situation which has encouraged the search for novel drugs [54]. The comparative analysis presented here  
288 identifies valuable putative protein targets for drug development, including *Paragonimus*-specific proteins and  
289 trematode-conserved proteins which do not share orthology to human proteins. The protein annotation data  
290 available in **Supplementary Table S2** also will enable prioritization including biological functional annotations  
291 [55, 56], protein weight and pi predictions [57], predictions of signal peptides and transmembrane domains [58]  
292 and cellular compartment localization [55], and sequence similarity matches to targets in the ChEMBL database  
293 [59]. This information can provide a starting point for future bioinformatic prioritization and drug testing  
294 (**Supplementary Tables S2 and S3**).

295 Vaccination to prevent future infections would offer an attractive alternative to treatment, but development  
296 of vaccine protection against trematode infection has so far been unsuccessful and is unlikely to be practical for  
297 paragonimiasis in the near future [60]. However, the complete genome sequences and comparative analysis of  
298 the gene sets presented here provide valuable resources for future vaccine target development.

299 Pulmonary paragonimiasis is frequently mistaken for tuberculosis or pneumonia, and often patients do  
300 not shed eggs, which leads to false positive diagnoses of other conditions such as malaria or pneumonia [4, 61,  
301 62]. This highlights a pressing need for accurate, rapid and affordable diagnostic approaches for paragonimiasis,  
302 a topic which has been the focus of numerous reports. We performed BLAST sequence similarity searches of  
303 previously identified *Paragonimus* diagnostic antigen targets among the four species (**Supplementary Figure**



304 **S4**). These included: (i) *P. westermani* and *P. pseudoheterotremus* cysteine proteases identified in two previous  
305 studies [63, 64] (matching to the same protein targets from both studies in *P. heterotremus* and *P. kellicotti*), one  
306 of which had high adult-stage expression levels in all four species [63]; (ii) three different tyrosine kinases (one  
307 of which was identified in two different studies, in *Clonorchis sinensis* and in *P. westermani* [65, 66]), all of which  
308 had relatively low gene expression levels in adult stages; (iii) a previously unannotated *P. heterotremus* ELISA  
309 antigen [67] with low expression across life cycle stages, which we now annotate as a saposin protein (which  
310 we found to rapidly evolve among flukes [**Figure 5C**], and which is strongly immunogenic in fascioliasis [48]);  
311 (iv) eggshell proteins of *P. westermani* [68], for which we now provide full-length sequences. We observed that  
312 this gene was conserved across and specific to the lung flukes, with lower gene expression in the young adult  
313 stage (*P. heterotremus*), but higher expression in the adult stages of all species; (v) among serodiagnostic *P.*  
314 *kellicotti* antigens based on a transcriptome assembly and proteomic evidence [69], we identified the top 10 of  
315 the 25 prioritized transcripts that best matched between the transcript sequence and the newly annotated draft  
316 genome of *P. kellicotti*. Thereafter, the full-length gene sequence in *P. kellicotti* was employed to query the other  
317 species. Several of these were highly expressed in the adult stage of all four species, including one that is fluke  
318 specific (PKEL\_05597). However, not all of these had high sequence conservation across all species, with two  
319 only having weak hits in *P. heterotremus* (PKEL\_00171 and PKEL\_01872).

320 As a result of this newly developed genomic resource for the lung flukes, previously identified diagnostic  
321 targets were identified with full gene sequences across all four species. The complete gene sequences,  
322 conservation information and transcriptomic gene expression data for these target proteins can allow for  
323 optimization of the targets for diagnostic testing that is effective on species spanning the genus (**Supplementary**  
324 **Figure S5**). This is noteworthy given the absence of a standardized, commercially-available test for  
325 serodiagnosis for human paragonimiasis.

## 326

### 327 **Conclusion**

328 To substantially improve our understanding of the lung flukes at the molecular level, we sequenced,  
329 assembled, annotated and compared draft genomes of four species of *Paragonimus*, three from Asia (*P.*  
330 *miyazakii*, *P. westermani* from Japan, *P. heterotremus*) and one from North America (*P. kellicotti*), thereby  
331 providing novel and valuable genomic resources across these important parasites for the first time. We have

utilized these new resources to compare and analyze phylogenies, to identify gene sets and biological functions associated with parasitism in lung flukes, and to contribute a key resource for future investigation into host-parasite interactions for these poorly-understood agents of neglected tropical disease. Our identification of previously prioritized *Paragonimus* diagnostic markers in each of the four lung fluke species revealed that the same protein targets were identified in multiple studies, and hence the availability of full gene sequences now should facilitate diagnostic assays aiming for reactivity across all species of lung fluke. Overall, the novel genomic and transcriptomic resources developed here will be invaluable for research on paragonimiasis, guiding experimental design and generation of novel hypotheses.

## Methods

### Parasite specimens

Samples of DNA and RNA of *Paragonimus westermani* were sourced in Japan. *Paragonimus heterotremus* (LC strain, Vietnam) were recovered from a cat experimentally infected with metacercariae from Lai Chau province, northern Vietnam (70% ethanol preserved; whole worm). *Paragonimus miyazakii* metacercariae were recovered from freshwater crabs (*Geothelphusa dehaani*), collected in Shizuoka Prefecture, central Japan [15], and were raised to adulthood in rats. DNA and RNA samples were prepared for each of the (pre-)adult flukes recovered from the lungs and from the pleural and peritoneal cavities of experimentally infected rats. *Paragonimus kellicotti* adult worms for genome sequencing were recovered from the lungs of Mongolian gerbils infected in the laboratory with metacercariae recovered from Missouri crayfish [70].

### Genome sequencing, assembly and annotation

DNA and RNA samples were collected from adult-stage parasites of four distinct *Paragonimus* species: *P. miyazakii* (Japan), *P. heterotremus* (LC strain, Vietnam), *P. kellicotti* (Missouri, USA) and *Paragonimus westermani* (Japan). Illumina DNA sequencing produced fragments, 3kb- and 8kb-insert whole-genome shotgun libraries, and PacBio reads were generated for *P. kellicotti*. The sequences were generated on the Illumina platform and assembled using Allpaths\_LG [71]. Scaffolding was improved using an in-house tool called Pygap (gap closure tool), the Pyramid assembler with Illumina paired reads to close gaps and extend contigs, and L\_RNA\_scaffolder [72] which uses transcript alignments to improve contiguity. For *P. kellicotti*, Nanocorr was

360 used to perform error correction on the PacBio data and PBJelly was used to fill gaps and improve the Illumina  
361 allpaths assembly using the PacBio reads [73]. The nuclear genomes were annotated using the MAKER pipeline  
362 v2.31.8 [74]. Repetitive elements were softmasked with RepeatMasker v4.0.6 using a species-specific repeat  
363 library created by RepeatModeler v1.0.8, RepBase repeat libraries [75], and a list of known transposable  
364 elements provided by MAKER [74]. RNA-seq reads were aligned to their respective genome assemblies and  
365 assembled using StringTie v1.2.4 [76] (*P. miyazakii* samples collected from stages in the liver, peritoneal cavity  
366 [2 replicates], lung (adult) and pleural cavity; *P. heterotremus* samples from adults and young adults [2  
367 replicates]; *P. westermani* [69] and *P. kellicotti* [77] adult-stage transcriptomic reads were retrieved from  
368 published reports). The resulting alignments and transcript assemblies were used by BRAKER [78] and MAKER  
369 pipelines, respectively, as extrinsic evidence. In addition, mRNA and EST sequences for each species were  
370 retrieved from NCBI, and were provided to MAKER as protein homology evidence along with protein sequences  
371 from UniRef100 [79] (Trematoda-specific, n=205,161) and WormBase ParaSite WBPS7 [80]. *Ab initio* gene  
372 predictions from BRAKER v2 [78] and AUGUSTUS v3.2.2 (trained by BRAKER and run within MAKER) were  
373 refined using the transcript and protein evidence. Previously unpredicted exons and UTRs were added, and split  
374 models were merged. The best-supported gene models were chosen based on Annotation Edit Distance (AED)  
375 [81]. To reduce false positives, gene predictions without supporting evidence were excluded in the final  
376 annotation build, with the exception of those encoding Pfam domains, as detected by InterProScan v5.19 [55].  
377 These Pfam encoding domains were rescued in order to improve the annotation accuracy overall by balancing  
378 sensitivity and specificity [74, 82]. Gene products were named using PANNZER2 [83] and sma3s v2 [84].  
379 **Supplementary Table S1** provides details of database accessions for the genomes. The completeness of  
380 annotated gene sets was assessed using BUSCO v3.0, eukaryota\_odb9 [17]. Gene Ontology (GO), KEGG and  
381 protease annotations were performed using InterProScan v5.19 [55], GhostKOALA [56], and MEROPS [85],  
382 respectively. ExpPASy was used to perform protein weight and pi predictions [57], SignalP was used to predict  
383 predictions signal peptides and transmembrane domains [58], and gene product localization was predicted using  
384 the “cellular component” Gene Ontology annotations provided by InterProScan [55].

385 Functional enrichment testing was performed using GOSTATS [86] for GO enrichment and negative  
386 binomial distribution tests for InterPro domain enrichment (minimum 3 annotated genes required for significant  
387 enrichment). Ribosomal RNAs and tRNAs were annotated using RNAmmer v1.2.1 [87] and tRNAscan-SE v1.23

[88], respectively. Genome characteristics and statistics including CDS, numbers and lengths of genes, exons and introns were defined using the longest complete mRNA (with start and stop codon) for each gene. Across the four species of *Paragonimus*, complete mRNAs were found for an average of 86.2% of all annotated genes.

Assembly of the mitochondrial genome of *P. kellicotti* was achieved using CANU [89] to align PacBio long-reads, followed by error-correction using Pilon [90].

MUMmer v4.0 [91] was used to estimate the level of genetic divergence between *P. westermani* samples from Japan and India. Nucmer was run first to generate genome alignments using draft assembly sequences. Dnadiff was then used to calculate the average sequence identity between the genomes considering only 1-to-1 alignments.

### Transcriptome datasets and gene functional annotations

RNA-seq datasets were trimmed for adapters [92] and aligned [93] to their respective genome assemblies, and gene expression levels (FPKM) were quantified per gene per sample in each of the four species [94]. Interpro domains and Gene Ontology (GO) terms [55], KEGG enzymes [56], and protease [85] annotations of the genes were used to identify putative functions of genes of interest and perform pathway enrichment [86]. All raw RNA-Seq fastq files were uploaded to the NCBI Sequence Read Archive (SRA [95]), and complete sample metadata and accession information are provided in **Supplementary Table S1. Supplementary Table S2** provides, for each of the species, complete gene lists and gene expression levels for each of the RNA-Seq samples. Complete functional annotations for every gene are also provided for *P. miyazakii* in this table.

### Repeat analysis

RepeatModeler v1.0.8 (with WU-BLAST as its search engine) was used to build, refine and classify consensus models of putative interspersed repeats for each species. With the resulting repeat libraries, genomic sequences were screened using RepeatMasker v4.0.6 in “slow search” mode to generate a detailed annotation of the interspersed and simple repeats. Per-copy distances to consensus were calculated (Kimura 2-parameter model, excluding CpG sites) and were plotted as repeat landscapes where divergence distribution reflected the activity of transposable elements (TE) on a relative time scale per genome using the calcDivergenceFromAlign.pl and createRepeatLandscape.pl scripts included in the RepeatMasker package.

416  
417  
418  
419  
420  
421  
422  
423  
424  
425  
426  
427  
428  
429  
430  
431  
432  
433  
434  
435  
436  
437  
438  
439  
440  
441  
442  
443

#### Gene family evolution

Orthologous groups (OG) of genes of 21 species were inferred with OrthoFinder v1.1.4 [96] using the longest isoform for each gene (*Paragonimus* genome source information in **Supplementary Table S1**; Worm gene sets were retrieved from WormBase ParaSite in June 2017 [80]; Outgroup species gene sets were retrieved from Ensembl in June 2017 [97]). CAFE method [23] was employed to model gene gain and loss while accounting for the species' phylogenetic history based on an ultrametric species tree and the number of gene copies found in each species for each gene family. Birth-death ( $\lambda$ ) parameters were estimated and the statistical significance of the observed family size differences among taxa were assessed. Results from OrthoFinder [96] were parsed to identify the OGs of interest based on conservation, including the lung fluke-conserved, liver fluke-conserved and blood fluke-conserved OGs and gene sets per species. **Supplementary Table S4** provides details of full OG counts per species and gene membership.

We used PosiGene [98] to search genome-wide for genes that evolved under positive selection based on the non-synonymous to synonymous substitution ratio. TMMOD [99] and Protter [100] were used for transmembrane helical topology prediction and visualization, respectively. We searched for genes that evolved under positive selection in the four *Paragonimus* spp. based on the non-synonymous to synonymous substitution rate ratio ( $d_N/d_S$ ). We conducted the branch-site test of positive selection to identify adaptive gene variants that became fixed in each species [35].

#### Previously identified *Paragonimus* diagnostic antigen search

Nucleotide sequences (or, if unavailable, amino acid sequences) were retrieved from each of the cited publications (**Supplementary Figure S5**). Diamond blastx (nucleotides; v0.9.9.110) or Diamond blastp (amino acids; v0.9.9.110) were used to identify the top hit gene in each *Paragonimus* genome annotation (default settings). The best BLAST E-value was used to identify the top match, followed by top bitscore, length and % ID in the case of ties. For the top 25 *P. kellicotti* immunodominant antigen transcripts identified in McNulty et al, 2014 [77], matches were identified between the assembled transcript and the annotated gene. For the other three species, the BLAST searches are performed against the identified *P. kellicotti* gene, and not the original transcript sequence.

444  
445  
446  
447  
448  
449  
450  
451  
452  
453  
454  
455  
456  
457  
458  
459  
460  
461  
462  
463  
464  
465  
466  
467  
468  
469  
470

### RNAseq-based gene expression profiling

After adapter trimming using Trimmomatic v0.36 [92], RNA-seq reads were aligned to their respective genome assemblies using the STAR aligner [93] (2-pass mode, basic). All raw RNA-Seq fastq files were uploaded to the NCBI Sequence Read Archive (SRA [95]), and complete sample metadata and accession information are provided in **Supplementary Table S1**. Read fragments (read pairs or single reads) were quantified per gene per sample using featureCounts (version 1.5.1) [94]. FPKM (fragments per kilobase of gene length per million reads mapped) normalization was also performed. Pearson correlation-based RNA-Seq sample clustering was performed in R (using the hclust package, complete linkage).

### Statistics

ANOVA analysis followed by Tukey's HSD post-hoc testing was performed to compare genome statistics and protease expression between species (**Figure 2, Supplementary Figure S3**). Because comparisons for the genome statistics by *t* tests involved large numbers of values, which can falsely indicate positive statistical significance, a random selection of 100 values from each species was used (excluding the upper and lower 1% of data to avoid outliers). Letter labels above the species indicate statistical groups, i.e., if two species share the same letter then they were not statistically significant from each other.

### **Availability of supporting data and materials**

Genomic raw reads, genome assemblies, genome annotations, and raw transcriptomic (RNA-Seq) fastq files were uploaded and are available for download from the NCBI Sequence Read Archive (SRA [95]), with all accession numbers and relevant metadata provided in **Supplementary Table S1. Supplementary Table S2** provides, for each of the species, complete gene lists and gene expression levels for each of the RNA-Seq samples. All results of the genome-wide selection scan are provided in **Supplementary Table S3**. For each orthologous group identified, **Supplementary Table S4** provides complete gene lists, counts of genes per species, and average gene expression levels from each the *Paragonimus* transcriptome datasets described

471 above. All relevant software versions, and commands specifying the parameters used are presented in  
472 **Supplementary Text S1.**

473

## 474 **Declarations**

475

### 476 List of Abbreviations

477 FPKM - Fragments Per Kilobase of gene length per Million reads mapped (gene expression level)

478 OG - Orthologous Group

479 TE – Transposable Elements

480

### 481 Consent for Publication

482 Not Applicable.

483

### 484 Competing Interests

485 The authors declare that they have no competing interests.

486

### 487 Funding

488 Sequencing of the genomes was supported by the ‘Sequencing the etiological agents of the Food-Borne  
489 Trematodiasis’ project (National Institutes of Health - National Human Genome Research Institute award  
490 number U54HG003079). Comparative genome analysis was funded by grants National Institutes of Health -  
491 National Institute of Allergy and Infectious Diseases AI081803 and National Institutes of Health - National  
492 Institute of General Medical Sciences GM097435 to M.M. Parasite material from Thailand was supported by  
493 Distinguished Research Professor Grant (WM), Thailand Research Fund (Grant no. DPG6280002).

494

### 495 Author’s Contributions

- 496 1. **Conceptualization:** MM PJB.
- 497 2. **Formal analysis:** BAR YJC SNM HJ JM.
- 498 3. **Funding acquisition:** PJB MM.
- 499 4. **Methodology:** PJB PUF DB MM.

- 500 5. **Resources:** MM TA HS TLH PND WM DB PUF.
- 501 6. **Visualization:** BAR YJC.
- 502 7. **Writing – original draft:** BAR YJC MM.
- 503 8. **Writing – review & editing:** DB PJB PUF MM.
- 504

#### 505 Acknowledgements

506 We gratefully acknowledge assistance provided by Xu Zhang and Kymberlie Pepin with genome assembly and  
507 annotation and by Rahul Tyagi for figure graphics. We thank Kurt Curtis for his help generating *P. kellicotti*  
508 parasite material.



- 512 1. Furst T, Keiser J and Utzinger J. Global burden of human food-borne trematodiasis: a systematic  
513 review and meta-analysis. *Lancet Infect Dis.* 2012;12 3:210-21. doi:10.1016/S1473-3099(11)70294-8.
- 514 2. Utzinger J, Becker SL, Knopp S, Blum J, Neumayr AL, Keiser J, et al. Neglected tropical diseases:  
515 diagnosis, clinical management, treatment and control. *Swiss Med Wkly.* 2012;142:w13727.  
516 doi:10.4414/smw.2012.13727.
- 517 3. Blair D. Paragonimiasis. *Adv Exp Med Biol.* 2014;766:115-52. doi:10.1007/978-1-4939-0915-5\_5.
- 518 4. Furst T, Sayasone S, Odermatt P, Keiser J and Utzinger J. Manifestation, diagnosis, and management  
519 of foodborne trematodiasis. *BMJ.* 2012;344:e4093. doi:10.1136/bmj.e4093.
- 520 5. Lv S, Zhang Y, Steinmann P, Zhou XN and Utzinger J. Helminth infections of the central nervous  
521 system occurring in Southeast Asia and the Far East. *Adv Parasitol.* 2010;72:351-408. doi:S0065-  
522 308X(10)72012-1 [pii]
- 523 6. Sripa B, Kaewkes S, Intapan PM, Maleewong W and Brindley PJ. Food-borne trematodiasis in  
524 Southeast Asia epidemiology, pathology, clinical manifestation and control. *Adv Parasitol.* 2010;72:305-  
525 50. doi:S0065-308X(10)72011-X [pii]
- 526 7. Liu Q, Wei F, Liu W, Yang S and Zhang X. Paragonimiasis: an important food-borne zoonosis in China.  
527 *Trends Parasitol.* 2008;24 7:318-23. doi:S1471-4922(08)00137-2 [pii]
- 528 8. Blair D, Xu ZB and Agatsuma T. Paragonimiasis and the genus *Paragonimus*. *Adv Parasitol.*  
529 1999;42:113-222.
- 530 9. Blair D, Davis GM and Wu B. Evolutionary relationships between trematodes and snails emphasizing  
531 schistosomes and paragonimids. *Parasitology.* 2001;123:S229-S43. doi:Doi  
532 10.1017/S003118200100837x.
- 533 10. Attwood SW, Upatham ES, Meng XH, Qiu DC and Southgate VR. The phylogeography of Asian  
534 *Schistosoma* (Trematoda: Schistosomatidae). *Parasitology.* 2002;125 Pt 2:99-112.  
535 doi:10.1017/s0031182002001981.
- 536 11. Doanh NP, Tu AL, Bui TD, Loan TH, Nonaka N, Horii Y, et al. Molecular and morphological variation of  
537 *Paragonimus westermani* in Vietnam with records of new second intermediate crab hosts and a new  
538 locality in a northern province. *Parasitology.* 2016;143 12:1639-46. doi:10.1017/S0031182016001219.
- 539 12. Oey H, Zakrzewski M, Narain K, Devi KR, Agatsuma T, Nawaratna S, et al. Whole-genome sequence  
540 of the oriental lung fluke *Paragonimus westermani*. *Gigascience.* 2019;8 1  
541 doi:10.1093/gigascience/giy146.
- 542 13. Blair D, Chang Z, Chen M, Cui A, Wu B, Agatsuma T, et al. *Paragonimus skrjabini* Chen, 1959  
543 (Digenea: Paragonimidae) and related species in eastern Asia: a combined molecular and  
544 morphological approach to identification and taxonomy. *Syst Parasitol.* 2005;60 1:1-21.  
545 doi:10.1007/s11230-004-1378-5.
- 546 14. Lane MA, Marcos LA, Onen NF, Demertzis LM, Hayes EV, Davila SZ, et al. *Paragonimus kellicotti*  
547 flukes in Missouri, USA. *Emerg Infect Dis.* 2012;18 8:1263-7. doi:10.3201/eid1808.120335.
- 548 15. Fischer PU and Weil GJ. North American paragonimiasis: epidemiology and diagnostic strategies.  
549 *Expert Rev Anti-Infe.* 2015;13 6:779-86. doi:10.1586/14787210.2015.1031745.
- 550 16. Blair D, Nawa Y, Mitreva M and Doanh PN. Gene diversity and genetic variation in lung flukes (genus  
551 *Paragonimus*). *Trans R Soc Trop Med Hyg.* 2016;110 1:6-12. doi:10.1093/trstmh/trv101.
- 552 17. Waterhouse RM, Seppey M, Simao FA, Manni M, Ioannidis P, Klioutchnikov G, et al. BUSCO  
553 applications from quality assessments to gene prediction and phylogenomics. *Mol Biol Evol.* 2017;  
554 doi:10.1093/molbev/msx319.
- 555 18. Choi YJ, Fontenla S, Fischer PU, Le TH, Costabile A, Blair D, et al. Adaptive Radiation of the Flukes of  
556 the Family Fasciolidae Inferred from Genome-Wide Comparisons of Key Species. *Mol Biol Evol.*  
557 2020;37 1:84-99. doi:10.1093/molbev/msz204.
- 558 19. Stapley J, Santure AW and Dennis SR. Transposable elements as agents of rapid adaptation may  
559 explain the genetic paradox of invasive species. *Mol Ecol.* 2015;24 9:2241-52. doi:10.1111/mec.13089.
- 560 20. Schrader L and Schmitz J. The impact of transposable elements in adaptive evolution. *Mol Ecol.* 2018;  
561 doi:10.1111/mec.14794.

- 562 21. Chenais B, Caruso A, Hiard S and Casse N. The impact of transposable elements on eukaryotic  
563 genomes: from genome size increase to genetic adaptation to stressful environments. *Gene*. 2012;509  
564 1:7-15. doi:10.1016/j.gene.2012.07.042.
- 565 22. Prasad PK, Tandon V, Biswal DK, Goswami LM and Chatterjee A. Phylogenetic reconstruction using  
566 secondary structures and sequence motifs of ITS2 rDNA of *Paragonimus westermani* (Kerbert, 1878)  
567 Braun, 1899 (Digenea: Paragonimidae) and related species. *BMC Genomics*. 2009;10 Suppl 3:S25.  
568 doi:10.1186/1471-2164-10-S3-S25.
- 569 23. Han MV, Thomas GW, Lugo-Martinez J and Hahn MW. Estimating gene gain and loss rates in the  
570 presence of error in genome assembly and annotation using CAFE 3. *Mol Biol Evol*. 2013;30 8:1987-  
571 97. doi:10.1093/molbev/mst100.
- 572 24. Ahn CS, Na BK, Chung DL, Kim JG, Kim JT and Kong Y. Expression characteristics and specific  
573 antibody reactivity of diverse cathepsin F members of *Paragonimus westermani*. *Parasitol Int*. 2015;64  
574 1:37-42. doi:10.1016/j.parint.2014.09.012.
- 575 25. McNulty SN, Tort JF, Rinaldi G, Fischer K, Rosa BA, Smircich P, et al. Genomes of *Fasciola hepatica*  
576 from the Americas Reveal Colonization with Neorickettsia Endobacteria Related to the Agents of  
577 Potomac Horse and Human Sennetsu Fevers. *PLoS Genet*. 2017;13 1:e1006537.  
578 doi:10.1371/journal.pgen.1006537.
- 579 26. Jones MK, Gobert GN, Zhang L, Sunderland P and McManus DP. The cytoskeleton and motor proteins  
580 of human schistosomes and their roles in surface maintenance and host-parasite interactions.  
581 *Bioessays*. 2004;26 7:752-65. doi:10.1002/bies.20058.
- 582 27. Mathieson W and Wilson RA. A comparative proteomic study of the undeveloped and developed  
583 *Schistosoma mansoni* egg and its contents: the miracidium, hatch fluid and secretions. *Int J Parasitol*.  
584 2010;40 5:617-28. doi:10.1016/j.ijpara.2009.10.014.
- 585 28. Sotillo J, Pearson M, Becker L, Mulvenna J and Loukas A. A quantitative proteomic analysis of the  
586 tegumental proteins from *Schistosoma mansoni* schistosomula reveals novel potential therapeutic  
587 targets. *Int J Parasitol*. 2015;45 8:505-16. doi:10.1016/j.ijpara.2015.03.004.
- 588 29. Liu F, Cui SJ, Hu W, Feng Z, Wang ZQ and Han ZG. Excretory/secretory proteome of the adult  
589 developmental stage of human blood fluke, *Schistosoma japonicum*. *Mol Cell Proteomics*. 2009;8  
590 6:1236-51. doi:10.1074/mcp.M800538-MCP200.
- 591 30. Kolinski T, Marek-Trzonkowska N, Trzonkowski P and Siebert J. Heat shock proteins (HSPs) in the  
592 homeostasis of regulatory T cells (Tregs). *Cent Eur J Immunol*. 2016;41 3:317-23.  
593 doi:10.5114/ceji.2016.63133.
- 594 31. Pereira AS, Cavalcanti MG, Zingali RB, Lima-Filho JL and Chaves ME. Isoforms of Hsp70-binding  
595 human LDL in adult *Schistosoma mansoni* worms. *Parasitol Res*. 2015;114 3:1145-52.  
596 doi:10.1007/s00436-014-4292-z.
- 597 32. He S, Yang L, Lv Z, Hu W, Cao J, Wei J, et al. Molecular and functional characterization of a mortalin-  
598 like protein from *Schistosoma japonicum* (SjMLP/hsp70) as a member of the HSP70 family. *Parasitol*  
599 *Res*. 2010;107 4:955-66. doi:10.1007/s00436-010-1960-5.
- 600 33. Reis EV, Pereira RV, Gomes M, Jannotti-Passos LK, Baba EH, Coelho PM, et al. Characterisation of  
601 major vault protein during the life cycle of the human parasite *Schistosoma mansoni*. *Parasitol Int*.  
602 2014;63 1:120-6. doi:10.1016/j.parint.2013.10.005.
- 603 34. Messerli SM, Kasinathan RS, Morgan W, Spranger S and Greenberg RM. *Schistosoma mansoni* P-  
604 glycoprotein levels increase in response to praziquantel exposure and correlate with reduced  
605 praziquantel susceptibility. *Mol Biochem Parasitol*. 2009;167 1:54-9.  
606 doi:10.1016/j.molbiopara.2009.04.007.
- 607 35. Yang Z. PAML 4: phylogenetic analysis by maximum likelihood. *Mol Biol Evol*. 2007;24 8:1586-91.  
608 doi:10.1093/molbev/msm088.
- 609 36. Huang S, Yuan S, Dong M, Su J, Yu C, Shen Y, et al. The phylogenetic analysis of tetraspanins  
610 projects the evolution of cell-cell interactions from unicellular to multicellular organisms. *Genomics*.  
611 2005;86 6:674-84. doi:10.1016/j.ygeno.2005.08.004.
- 612 37. Chaiyadet S, Krueajampa W, Hipkaeo W, Plosan Y, Piratae S, Sotillo J, et al. Suppression of mRNAs  
613 encoding CD63 family tetraspanins from the carcinogenic liver fluke *Opisthorchis viverrini* results in  
614 distinct tegument phenotypes. *Sci Rep*. 2017;7 1:14342. doi:10.1038/s41598-017-13527-5.
- 615 38. Krautz-Peterson G, Debatis M, Tremblay JM, Oliveira SC, Da'dara AA, Skelly PJ, et al. *Schistosoma*  
616 *mansoni* Infection of Mice, Rats and Humans Elicits a Strong Antibody Response to a Limited Number

- 617 of Reduction-Sensitive Epitopes on Five Major Tegumental Membrane Proteins. *PLoS Negl Trop Dis*.  
618 2017;11 1:e0005306. doi:10.1371/journal.pntd.0005306.
- 619 39. Tran MH, Pearson MS, Bethony JM, Smyth DJ, Jones MK, Duke M, et al. Tetraspanins on the surface  
620 of *Schistosoma mansoni* are protective antigens against schistosomiasis. *Nat Med*. 2006;12 7:835-40.  
621 doi:10.1038/nm1430.
- 622 40. Wu C, Cai P, Chang Q, Hao L, Peng S, Sun X, et al. Mapping the binding between the tetraspanin  
623 molecule (Sjc23) of *Schistosoma japonicum* and human non-immune IgG. *PLoS One*. 2011;6  
624 4:e19112. doi:10.1371/journal.pone.0019112.
- 625 41. Sealey KL, Kirk RS, Walker AJ, Rollinson D and Lawton SP. Adaptive radiation within the vaccine  
626 target tetraspanin-23 across nine *Schistosoma* species from Africa. *Int J Parasitol*. 2013;43 1:95-103.  
627 doi:10.1016/j.ijpara.2012.11.007.
- 628 42. Yang Y, Wen Y, Cai YN, Vallee I, Boireau P, Liu MY, et al. Serine proteases of parasitic helminths.  
629 *Korean J Parasitol*. 2015;53 1:1-11. doi:10.3347/kjp.2015.53.1.1.
- 630 43. Glanfield A, McManus DP, Anderson GJ and Jones MK. Pumping iron: a potential target for novel  
631 therapeutics against schistosomes. *Trends Parasitol*. 2007;23 12:583-8. doi:10.1016/j.pt.2007.08.018.
- 632 44. Brindley PJ, Kalinna BH, Wong JY, Bogitsh BJ, King LT, Smyth DJ, et al. Proteolysis of human  
633 hemoglobin by schistosome cathepsin D. *Mol Biochem Parasitol*. 2001;112 1:103-12.
- 634 45. Williamson AL, Brindley PJ, Abbenante G, Prociv P, Berry C, Girdwood K, et al. Cleavage of  
635 hemoglobin by hookworm cathepsin D aspartic proteases and its potential contribution to host  
636 specificity. *FASEB J*. 2002;16 11:1458-60. doi:10.1096/fj.02-0181fje.
- 637 46. Lee EG, Na BK, Bae YA, Kim SH, Je EY, Ju JW, et al. Identification of immunodominant excretory-  
638 secretory cysteine proteases of adult *Paragonimus westermani* by proteome analysis. *Proteomics*.  
639 2006;6 4:1290-300. doi:10.1002/pmic.200500399.
- 640 47. Na BK, Kim SH, Lee EG, Kim TS, Bae YA, Kang I, et al. Critical roles for excretory-secretory cysteine  
641 proteases during tissue invasion of *Paragonimus westermani* newly excysted metacercariae. *Cell*  
642 *Microbiol*. 2006;8 6:1034-46. doi:10.1111/j.1462-5822.2006.00685.x.
- 643 48. Caban-Hernandez K and Espino AM. Differential expression and localization of saposin-like protein 2 of  
644 *Fasciola hepatica*. *Acta Trop*. 2013;128 3:591-7. doi:10.1016/j.actatropica.2013.08.012.
- 645 49. Basavaraju SV, Zhan B, Kennedy MW, Liu Y, Hawdon J and Hotez PJ. Ac-FAR-1, a 20 kDa fatty acid-  
646 and retinol-binding protein secreted by adult *Ancylostoma caninum* hookworms: gene transcription  
647 pattern, ligand binding properties and structural characterisation. *Mol Biochem Parasitol*. 2003;126  
648 1:63-71.
- 649 50. Jones MK, McManus DP, Sivadorai P, Glanfield A, Moertel L, Belli SI, et al. Tracking the fate of iron in  
650 early development of human blood flukes. *Int J Biochem Cell Biol*. 2007;39 9:1646-58.  
651 doi:10.1016/j.biocel.2007.04.017.
- 652 51. World Health Organization. 2019. Accessed August 25, 2019.
- 653 52. Kyung SY, Cho YK, Kim YJ, Park JW, Jeong SH, Lee JI, et al. A paragonimiasis patient with allergic  
654 reaction to praziquantel and resistance to triclabendazole: successful treatment after desensitization to  
655 praziquantel. *Korean J Parasitol*. 2011;49 1:73-7. doi:10.3347/kjp.2011.49.1.73.
- 656 53. Kelley JM, Elliott TP, Beddoe T, Anderson G, Skuce P and Spithill TW. Current Threat of  
657 Triclabendazole Resistance in *Fasciola hepatica*. *Trends Parasitol*. 2016; doi:10.1016/j.pt.2016.03.002.
- 658 54. Mader P, Rennar GA, Ventura AMP, Grevelding CG and Schlitzer M. Chemotherapy for Fighting  
659 Schistosomiasis: Past, Present and Future. *ChemMedChem*. 2018;13 22:2374-89.  
660 doi:10.1002/cmdc.201800572.
- 661 55. Jones P, Binns D, Chang HY, Fraser M, Li W, McAnulla C, et al. InterProScan 5: genome-scale protein  
662 function classification. *Bioinformatics*. 2014;30 9:1236-40. doi:10.1093/bioinformatics/btu031
- 663 56. Kanehisa M, Sato Y and Morishima K. BlastKOALA and GhostKOALA: KEGG Tools for Functional  
664 Characterization of Genome and Metagenome Sequences. *J Mol Biol*. 2016;428 4:726-31.  
665 doi:10.1016/j.jmb.2015.11.006.
- 666 57. Artimo P, Jonnalagedda M, Arnold K, Baratin D, Csardi G, de Castro E, et al. ExPASy: SIB  
667 bioinformatics resource portal. *Nucleic Acids Res*. 2012;40 Web Server issue:W597-603.  
668 doi:10.1093/nar/gks400.
- 669 58. Almagro Armenteros JJ, Tsirigos KD, Sonderby CK, Petersen TN, Winther O, Brunak S, et al. SignalP  
670 5.0 improves signal peptide predictions using deep neural networks. *Nat Biotechnol*. 2019;37 4:420-3.  
671 doi:10.1038/s41587-019-0036-z.

- 672 59. Mendez D, Gaulton A, Bento AP, Chambers J, De Veij M, Felix E, et al. ChEMBL: towards direct  
673 deposition of bioassay data. *Nucleic Acids Res.* 2019;47 D1:D930-D40. doi:10.1093/nar/gky1075.
- 674 60. Stutzer C, Richards SA, Ferreira M, Baron S and Maritz-Olivier C. Metazoan Parasite Vaccines:  
675 Present Status and Future Prospects. *Front Cell Infect Microbiol.* 2018;8:67.  
676 doi:10.3389/fcimb.2018.00067.
- 677 61. Radzikowska E, Chabowski M and Bestry I. Tuberculosis mimicry. *Eur Respir J.* 2006;27 3:652; author  
678 reply doi:10.1183/09031936.06.00121205.
- 679 62. Eapen S, Espinal E and Firstenberg M. Delayed diagnosis of paragonimiasis in Southeast Asian  
680 immigrants: A need for global awareness. 2018;4 2:173-7. doi:10.4103/ijam.ijam\_2\_18.
- 681 63. Yang SH, Park JO, Lee JH, Jeon BH, Kim WS, Kim SI, et al. Cloning and characterization of a new  
682 cysteine proteinase secreted by *Paragonimus westermani* adult worms. *Am J Trop Med Hyg.* 2004;71  
683 1:87-92.
- 684 64. Yoonuan T, Nuamtanong S, Dekumyoy P, Phuphisut O and Adisakwattana P. Molecular and  
685 immunological characterization of cathepsin L-like cysteine protease of *Paragonimus*  
686 *pseudoheterotremus*. *Parasitol Res.* 2016;115 12:4457-70. doi:10.1007/s00436-016-5232-x.
- 687 65. Kim SH and Bae YA. Lineage-specific expansion and loss of tyrosinase genes across platyhelminths  
688 and their induction profiles in the carcinogenic oriental liver fluke, *Clonorchis sinensis*. *Parasitology.*  
689 2017;144 10:1316-27. doi:10.1017/S003118201700083X.
- 690 66. Bae YA, Kim SH, Ahn CS, Kim JG and Kong Y. Molecular and biochemical characterization of  
691 *Paragonimus westermani* tyrosinase. *Parasitology.* 2015;142 6:807-15.  
692 doi:10.1017/S0031182014001942.
- 693 67. Pothong K, Komalamisra C, Kalambaheti T, Watthanakulpanich D, Yoshino TP and Dekumyoy P.  
694 ELISA based on a recombinant *Paragonimus heterotremus* protein for serodiagnosis of human  
695 paragonimiasis in Thailand. *Parasit Vectors.* 2018;11 1:322. doi:10.1186/s13071-018-2878-5.
- 696 68. Bae YA, Kim SH, Cai GB, Lee EG, Kim TS, Agatsuma T, et al. Differential expression of *Paragonimus*  
697 *westermani* eggshell proteins during the developmental stages. *Int J Parasitol.* 2007;37 3-4:295-305.  
698 doi:10.1016/j.ijpara.2006.10.006.
- 699 69. Li BW, McNulty SN, Rosa BA, Tyagi R, Zeng QR, Gu KZ, et al. Conservation and diversification of the  
700 transcriptomes of adult *Paragonimus westermani* and *P. skrjabini*. *Parasit Vectors.* 2016;9:497.  
701 doi:10.1186/s13071-016-1785-x.
- 702 70. Fischer PU, Curtis KC, Marcos LA and Weil GJ. Molecular characterization of the North American lung  
703 fluke *Paragonimus kellicotti* in Missouri and its development in Mongolian gerbils. *Am J Trop Med Hyg.*  
704 2011;84 6:1005-11. doi:10.4269/ajtmh.2011.11-0027.
- 705 71. Gnerre S, Maccallum I, Przybylski D, Ribeiro FJ, Burton JN, Walker BJ, et al. High-quality draft  
706 assemblies of mammalian genomes from massively parallel sequence data. *Proc Natl Acad Sci U S A.*  
707 2011;108 4:1513-8. doi:10.1073/pnas.1017351108.
- 708 72. Xue W, Li JT, Zhu YP, Hou GY, Kong XF, Kuang YY, et al. L\_RNA\_scaffolder: scaffolding genomes  
709 with transcripts. *BMC Genomics.* 2013;14:604. doi:10.1186/1471-2164-14-604.
- 710 73. English AC, Richards S, Han Y, Wang M, Vee V, Qu J, et al. Mind the gap: upgrading genomes with  
711 Pacific Biosciences RS long-read sequencing technology. *PLoS One.* 2012;7 11:e47768.  
712 doi:10.1371/journal.pone.0047768.
- 713 74. Holt C and Yandell M. MAKER2: an annotation pipeline and genome-database management tool for  
714 second-generation genome projects. *BMC Bioinformatics.* 2011;12:491. doi:10.1186/1471-2105-12-  
715 491.
- 716 75. Bao W, Kojima KK and Kohany O. Repbase Update, a database of repetitive elements in eukaryotic  
717 genomes. *Mob DNA.* 2015;6:11. doi:10.1186/s13100-015-0041-9.
- 718 76. Pertea M, Pertea GM, Antonescu CM, Chang TC, Mendell JT and Salzberg SL. StringTie enables  
719 improved reconstruction of a transcriptome from RNA-seq reads. *Nat Biotechnol.* 2015;33 3:290-5.  
720 doi:10.1038/nbt.3122.
- 721 77. McNulty SN, Fischer PU, Townsend RR, Curtis KC, Weil GJ and Mitreva M. Systems biology studies of  
722 adult *paragonimus* lung flukes facilitate the identification of immunodominant parasite antigens. *PLoS*  
723 *Negl Trop Dis.* 2014;8 10:e3242. doi:10.1371/journal.pntd.0003242.
- 724 78. Hoff KJ, Lange S, Lomsadze A, Borodovsky M and Stanke M. BRAKER1: Unsupervised RNA-Seq-  
725 Based Genome Annotation with GeneMark-ET and AUGUSTUS. *Bioinformatics.* 2016;32 5:767-9.  
726 doi:10.1093/bioinformatics/btv661.

- 727 79. The UniProt C. UniProt: the universal protein knowledgebase. *Nucleic Acids Res.* 2017;45 D1:D158-  
728 D69. doi:10.1093/nar/gkw1099.
- 729 80. Howe KL, Bolt BJ, Shafie M, Kersey P and Berriman M. WormBase ParaSite - a comprehensive  
730 resource for helminth genomics. *Mol Biochem Parasitol.* 2017;215:2-10.  
731 doi:10.1016/j.molbiopara.2016.11.005.
- 732 81. Eilbeck K, Moore B, Holt C and Yandell M. Quantitative measures for the management and comparison  
733 of annotated genomes. *BMC Bioinformatics.* 2009;10:67. doi:10.1186/1471-2105-10-67.
- 734 82. Campbell MS, Law M, Holt C, Stein JC, Moghe GD, Hufnagel DE, et al. MAKER-P: a tool kit for the  
735 rapid creation, management, and quality control of plant genome annotations. *Plant Physiol.* 2014;164  
736 2:513-24. doi:10.1104/pp.113.230144.
- 737 83. Koskinen P, Toronen P, Nokso-Koivisto J and Holm L. PANNZER: high-throughput functional  
738 annotation of uncharacterized proteins in an error-prone environment. *Bioinformatics.* 2015;31 10:1544-  
739 52. doi:10.1093/bioinformatics/btu851.
- 740 84. Casimiro-Soriguer CS, Munoz-Merida A and Perez-Pulido AJ. Sma3s: A universal tool for easy  
741 functional annotation of proteomes and transcriptomes. *Proteomics.* 2017;17 12  
742 doi:10.1002/pmic.201700071.
- 743 85. Rawlings ND, Barrett AJ and Finn R. Twenty years of the MEROPS database of proteolytic enzymes,  
744 their substrates and inhibitors. *Nucleic Acids Res.* 2016;44 D1:D343-50. doi:10.1093/nar/gkv1118.
- 745 86. Falcon S and Gentleman R. Using GOstats to test gene lists for GO term association. *Bioinformatics.*  
746 2007;23 2:257-8. doi:10.1093/bioinformatics/btl567.
- 747 87. Lagesen K, Hallin P, Rodland EA, Staerfeldt HH, Rognes T and Ussery DW. RNAmmer: consistent and  
748 rapid annotation of ribosomal RNA genes. *Nucleic Acids Res.* 2007;35 9:3100-8.  
749 doi:10.1093/nar/gkm160.
- 750 88. Lowe TM and Eddy SR. tRNAscan-SE: a program for improved detection of transfer RNA genes in  
751 genomic sequence. *Nucleic Acids Res.* 1997;25 5:955-64.
- 752 89. Koren S, Walenz BP, Berlin K, Miller JR, Bergman NH and Phillippy AM. Canu: scalable and accurate  
753 long-read assembly via adaptive k-mer weighting and repeat separation. *Genome Res.* 2017;27 5:722-  
754 36. doi:10.1101/gr.215087.116.
- 755 90. Walker BJ, Abeel T, Shea T, Priest M, Abouelliel A, Sakthikumar S, et al. Pilon: an integrated tool for  
756 comprehensive microbial variant detection and genome assembly improvement. *PLoS One.* 2014;9  
757 11:e112963. doi:10.1371/journal.pone.0112963.
- 758 91. Marcais G, Delcher AL, Phillippy AM, Coston R, Salzberg SL and Zimin A. MUMmer4: A fast and  
759 versatile genome alignment system. *PLoS Comput Biol.* 2018;14 1:e1005944.  
760 doi:10.1371/journal.pcbi.1005944.
- 761 92. Bolger AM, Lohse M and Usadel B. Trimmomatic: a flexible trimmer for Illumina sequence data.  
762 *Bioinformatics.* 2014;30 15:2114-20. doi:10.1093/bioinformatics/btu170.
- 763 93. Dobin A, Davis CA, Schlesinger F, Drenkow J, Zaleski C, Jha S, et al. STAR: ultrafast universal RNA-  
764 seq aligner. *Bioinformatics.* 2013;29 1:15-21. doi:10.1093/bioinformatics/bts635.
- 765 94. Liao Y, Smyth GK and Shi W. featureCounts: an efficient general purpose program for assigning  
766 sequence reads to genomic features. *Bioinformatics.* 2014;30 7:923-30.  
767 doi:10.1093/bioinformatics/btt656.
- 768 95. Leinonen R, Sugawara H, Shumway M and on behalf of the International Nucleotide Sequence  
769 Database C. The Sequence Read Archive. *Nucleic Acids Res.* 2011;39 Database issue:D19-D21.  
770 doi:10.1093/nar/gkq1019.
- 771 96. Emms DM and Kelly S. OrthoFinder: solving fundamental biases in whole genome comparisons  
772 dramatically improves orthogroup inference accuracy. *Genome Biol.* 2015;16:157. doi:10.1186/s13059-  
773 015-0721-2.
- 774 97. Zerbino DR, Achuthan P, Akanni W, Amode MR, Barrell D, Bhai J, et al. Ensembl 2018. *Nucleic Acids*  
775 *Res.* 2018;46 D1:D754-D61. doi:10.1093/nar/gkx1098.
- 776 98. Sahm A, Bens M, Platzer M and Szafranski K. PosiGene: automated and easy-to-use pipeline for  
777 genome-wide detection of positively selected genes. *Nucleic Acids Res.* 2017;45 11:e100.  
778 doi:10.1093/nar/gkx179.
- 779 99. Kahsay RY, Gao G and Liao L. An improved hidden Markov model for transmembrane protein  
780 detection and topology prediction and its applications to complete genomes. *Bioinformatics.* 2005;21  
781 9:1853-8. doi:10.1093/bioinformatics/bti303.

782 100. Omasits U, Ahrens CH, Muller S and Wollscheid B. Protter: interactive protein feature visualization and  
783 integration with experimental proteomic data. *Bioinformatics*. 2014;30 6:884-6.  
784 doi:10.1093/bioinformatics/btt607.  
785

786

## 787 Figure Captions

788  
789 **Figure 1.** Comparisons of the overall content of the assembled *Paragonimus* genome assemblies. Comparisons  
790 are based on **(A)** length (including statistics for other sequenced trematode genomes) and **(B)** Repeat  
791 landscapes, measured using the Kimura substitution level, which indicates how much a repeat sequence has  
792 degenerated since its incorporation into the genome (i.e., how recently the repeat sequence was added). The  
793 high peak at the far left of *P. kellicotti* indicates a recent incorporation or active transposable element activity.

794  
795 **Figure 2:** Comparison of genome annotation characteristics and attributes among several species of flatworms.  
796 Attributes characterized included **(A)** Full gene lengths, including coding and noncoding sequences, **(B)** Average  
797 intron lengths per gene, **(C)** Number of exons per gene, and **(D)** Coding sequence (CDS) length per exon. *P*  
798 values and letter groupings indicating significant differences among species, as calculated using ANOVA with  
799 Tukey's HSD post-hoc test.

800  
801 **Figure 3.** Clustering of *Paragonimus* species. **(A)** Mitochondrial whole genome-based phylogeny, including  
802 previously-sequenced *Paragonimus* mitochondrial genomes (with accessions indicated). **(B)** Species clustering  
803 based on single-member OPF sequences. 262,720 genes (85% of all genes across the species) were assigned  
804 to 17,953 OPFs; 2,493 genes are in 326 species-specific OPFs.

805  
806 **Figure 4.** Gene-family dynamics among platyhelminth species. **(A)** Rapidly evolving families of interest are  
807 quantified at each stage of the phylogeny, including genes gained (blue) and lost (red) relative to other species.  
808 The number of rapidly evolving genes are indicated in parentheses. **(B)** Functionally annotated gene families of  
809 interest that displayed most pronounced differential expansions or contractions. **(C)** Overall protease and  
810 protease inhibitor abundance per species.

811  
812 **Figure 5.** Orthologous Group (OG) distribution analysis. **(A)** OGs identified among groups of flukes. The OGs  
813 conserved in at least one of the species from each group are indicated in black, and the OGs conserved among  
814 all the species in the overlapping groups are indicated in red. **(B)** Counts of OGs among the four *Paragonimus*

815 species, with *Paragonimus*-specific gene sets indicated in red text. The 256 *Paragonimus* conserved-and-  
816 specific genes are indicated with highlight (Table 4). (C) Significant functional enrichment (Interpro domains)  
817 among the gene sets conserved among, and specific to, each major group of flukes (256, 758 and 270 OPFs in  
818 lung, liver and blood flukes, respectively), relative to the functions in the complete gene sets.

819  
820 **Figure 6:** Analysis of gene expression data for species of lung flukes of the genus *Paragonimus*. (A) Comparison  
821 of adult-stage gene expression levels among 1:1 orthologs shared by *P. westermani* and *P. miyazakii*. Pearson  
822 correlation = 0.79. (B) Pearson correlation values between all lung fluke species for the adult-stage expression  
823 levels of all 1:1 orthologous genes.



827 **Table 1:** The draft genome of *Paragonimus*: assembly, size and annotation characteristics

| Statistic                                            | <i>Paragonimus miyazakii</i> | <i>Paragonimus heterotremus</i> | <i>Paragonimus kellecotti</i> | <i>Paragonimus westermani</i> (Japan) | <i>Paragonimus westermani</i> (India) |
|------------------------------------------------------|------------------------------|---------------------------------|-------------------------------|---------------------------------------|---------------------------------------|
| <b>Assembly statistics</b>                           |                              |                                 |                               |                                       |                                       |
| Total genome length (Mb)                             | 915.8                        | 841.2                           | 696.5                         | 923.3                                 | 922.8                                 |
| Number of contigs                                    | 22,318                       | 27,557                          | 29,377                        | 22,477                                | 30,455                                |
| Mean contig size (kb)                                | 41                           | 30.5                            | 23.7                          | 41.1                                  | 30.3                                  |
| Median contig size (kb)                              | 15.1                         | 9.3                             | 10.2                          | 17.2                                  | 4.8                                   |
| Max. contig size (kb)                                | 919.8                        | 715.6                           | 826                           | 829                                   | 809.4                                 |
| N50 length (kb)                                      | 108.8                        | 92.5                            | 56.0                          | 100.8                                 | 135.2                                 |
| N50 number                                           | 2,320                        | 2,506                           | 3,316                         | 2,664                                 | 1,943                                 |
| <b>BUSCO completeness (303 genes, eukarota_odb9)</b> |                              |                                 |                               |                                       |                                       |
| Complete, single copy                                | 84.5%                        | 82.5%                           | 70.3%                         | 88.78%                                | 76.90%                                |
| Complete, duplicated                                 | 1.3%                         | 0.0%                            | 1.3%                          | 1.32%                                 | 2.31%                                 |
| Fragmented                                           | 7.6%                         | 10.9%                           | 15.2%                         | 6.27%                                 | 14.85%                                |
| Missing                                              | 6.6%                         | 6.6%                            | 13.2%                         | 3.63%                                 | 5.94%                                 |
| <b>Gene statistics</b>                               |                              |                                 |                               |                                       |                                       |
| Number of genes                                      | 12,652                       | 12,490                          | 12,853                        | 12,072                                | 12,771                                |
| Avg gene length (kb)                                 | 25.9                         | 22.6                            | 17.6                          | 24.1                                  | 18.0                                  |
| Avg CDS length (kb)                                  | 1.5                          | 1.4                             | 1.1                           | 1.4                                   | 1.4                                   |
| Avg intron length (kb)                               | 4.2                          | 4                               | 3.6                           | 4.2                                   | 4.0                                   |
| Avg # exons per gene                                 | 6.7                          | 6.2                             | 5.3                           | 6.3                                   | 5.2                                   |
| % annotated InterPro                                 | 82%                          | 85%                             | 81%                           | 87%                                   | 82%                                   |
| % annotated KEGG                                     | 40%                          | 41%                             | 34%                           | 43%                                   | 43%                                   |

828

829

830

**Table 2.** "Molecular Function" Gene Ontology terms enriched among *P. miyazakii* genes that are conserved among and exclusive to lung flukes.

| GO ID      | GO term name                                        | P value | # Conserved and Specific | Total # in genome |
|------------|-----------------------------------------------------|---------|--------------------------|-------------------|
| GO:0004175 | endopeptidase activity                              | 5.2E-05 | 8                        | 132               |
| GO:0008236 | serine-type peptidase activity                      | 5.6E-05 | 6                        | 67                |
| GO:0017171 | serine hydrolase activity                           | 5.6E-05 | 6                        | 67                |
| GO:0004252 | serine-type endopeptidase activity                  | 1.6E-04 | 5                        | 51                |
| GO:0070011 | peptidase activity, acting on L-amino acid peptides | 6.1E-04 | 9                        | 237               |
| GO:0008233 | peptidase activity                                  | 8.7E-04 | 9                        | 249               |
| GO:0004568 | chitinase activity                                  | 2.1E-03 | 2                        | 7                 |
| GO:0004190 | aspartic-type endopeptidase activity                | 1.1E-02 | 2                        | 16                |
| GO:0070001 | aspartic-type peptidase activity                    | 1.1E-02 | 2                        | 16                |
| GO:0008199 | ferric iron binding                                 | 1.1E-02 | 2                        | 16                |

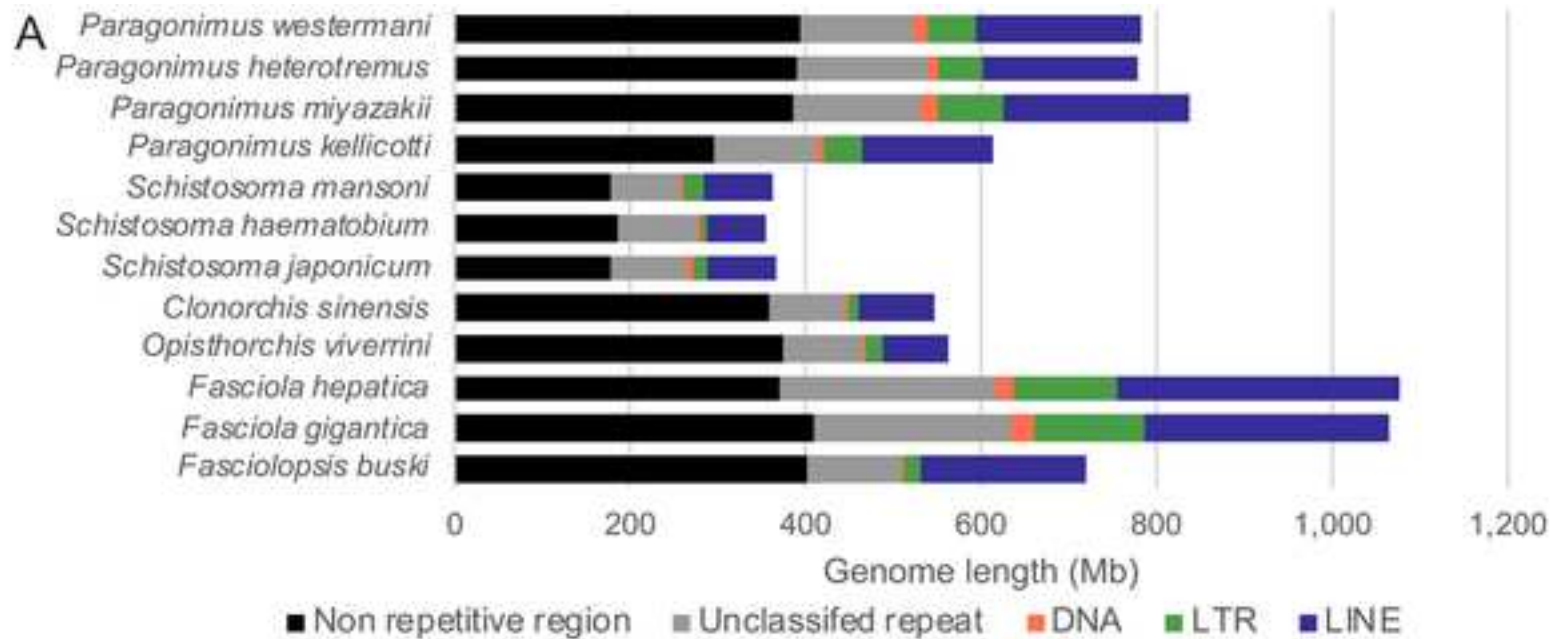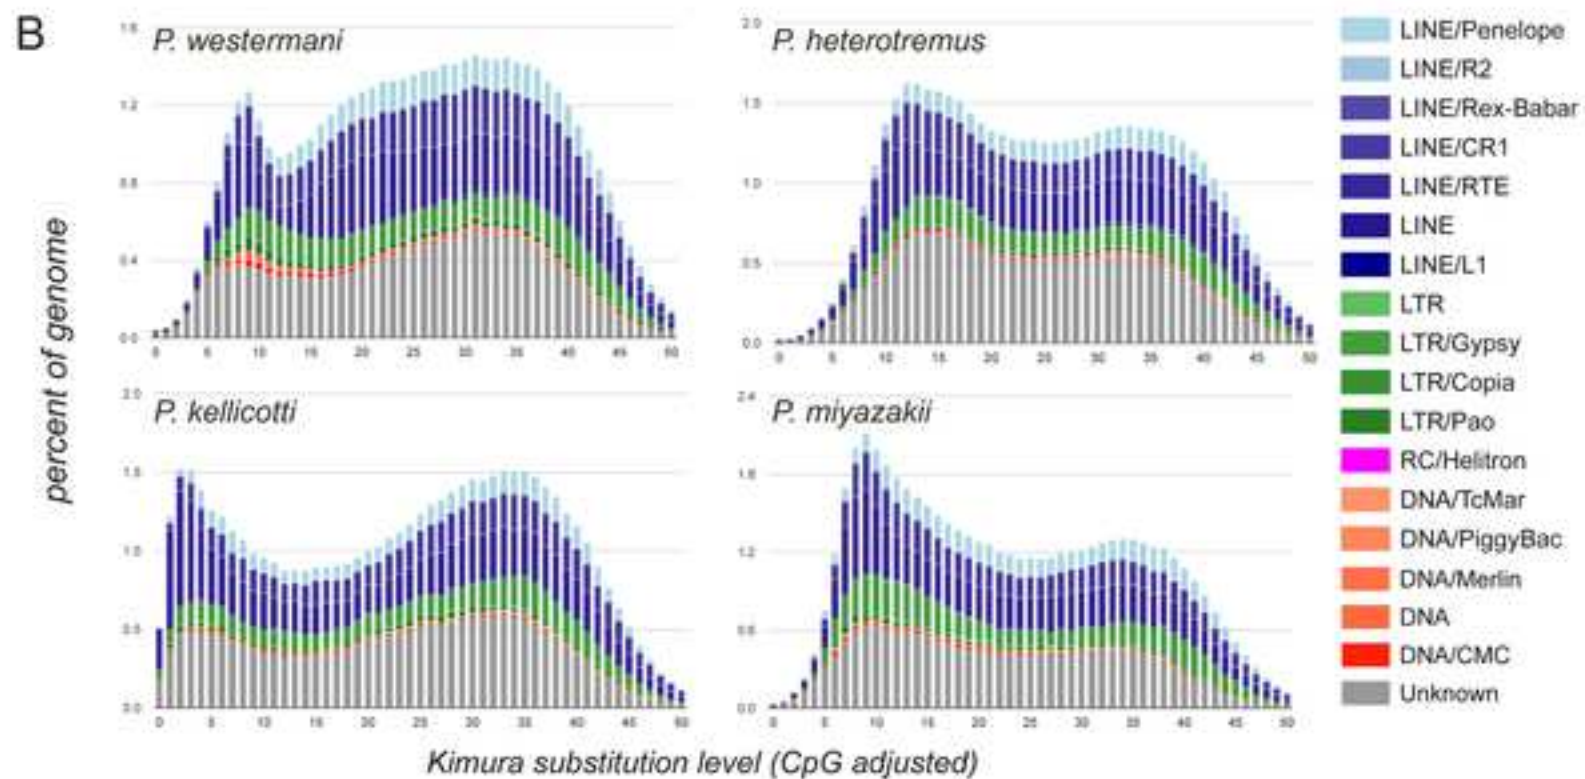

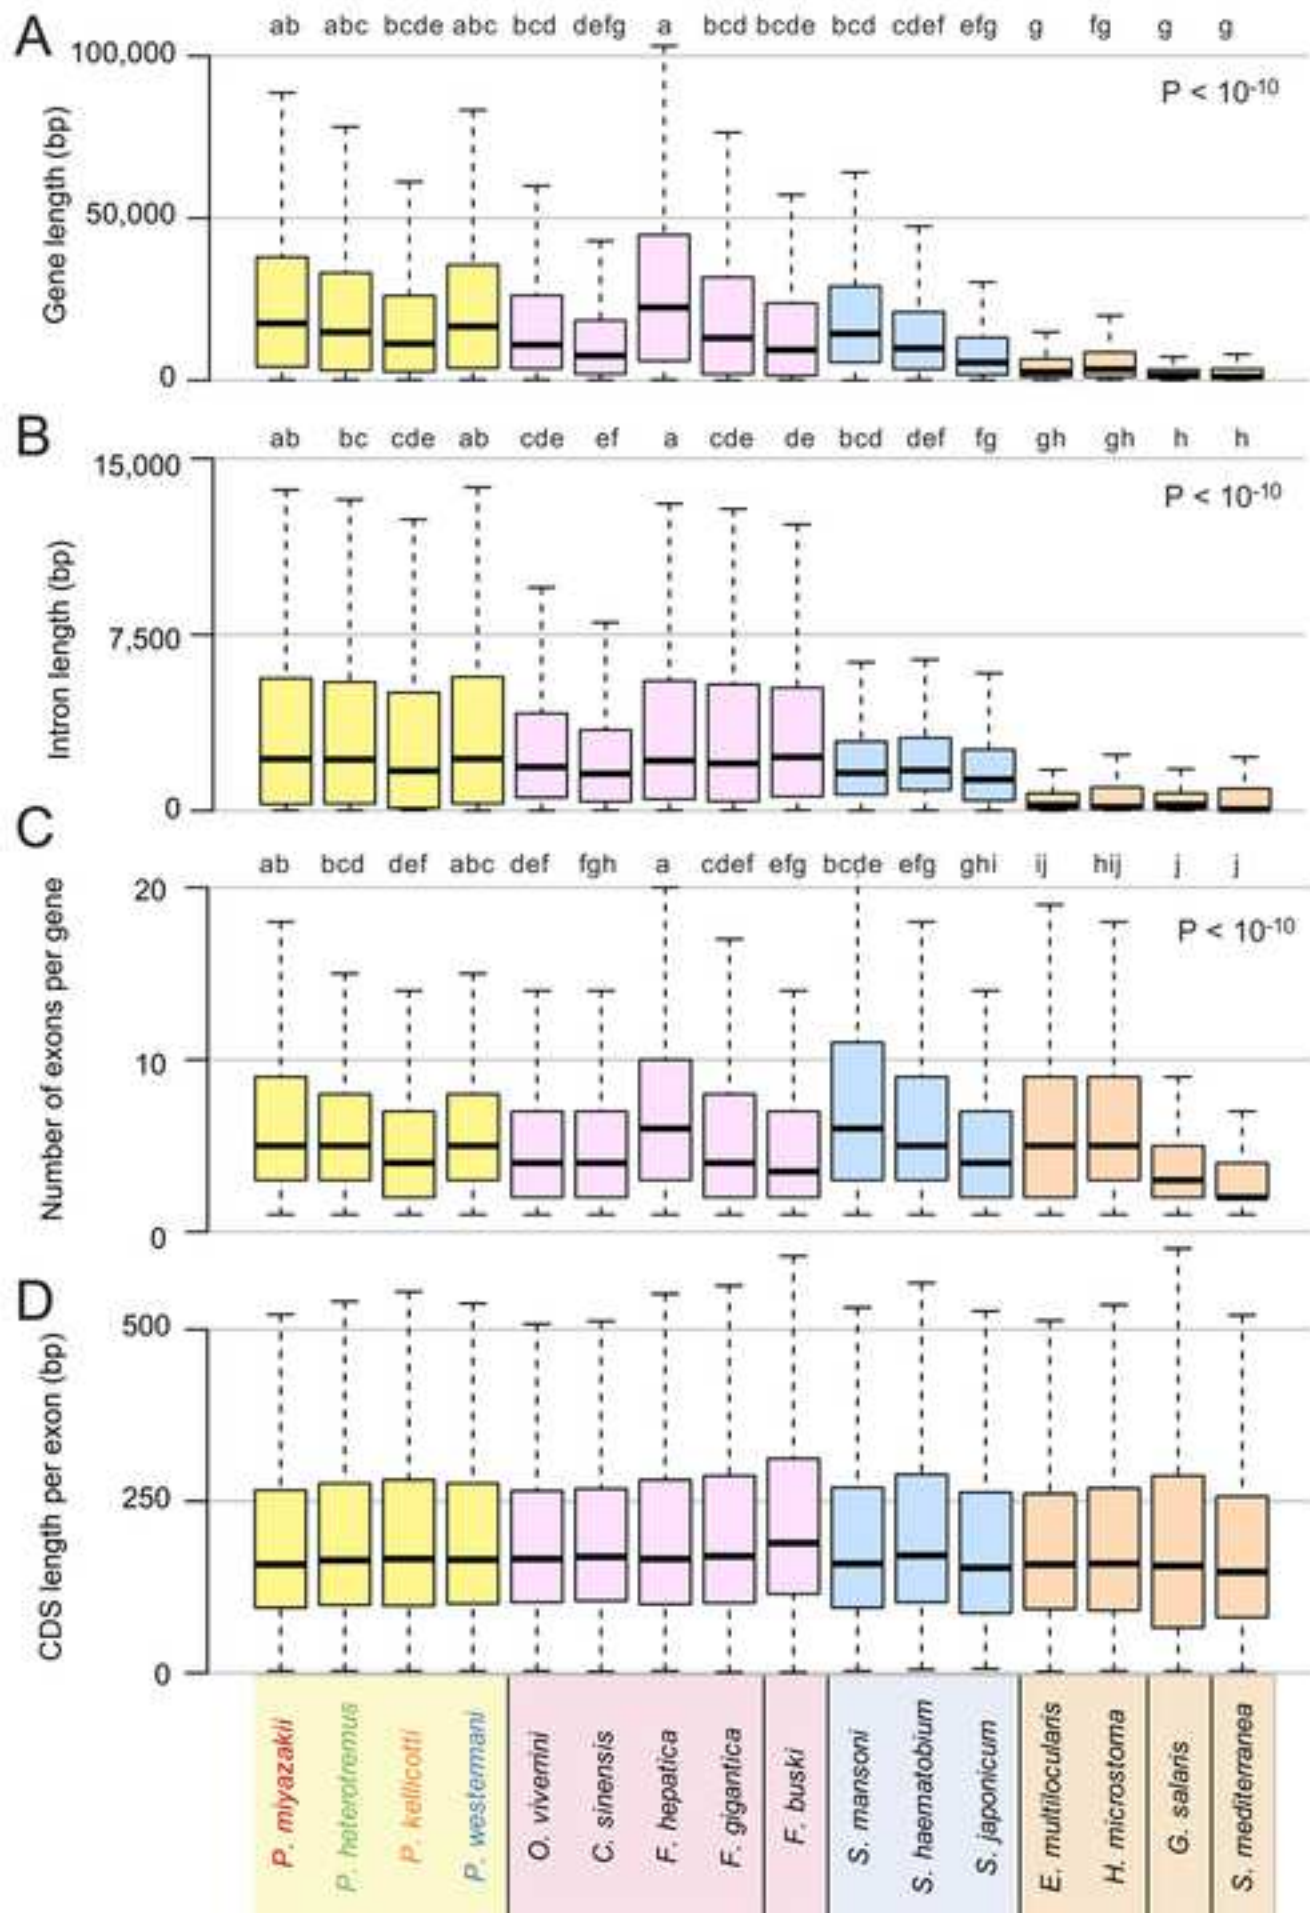

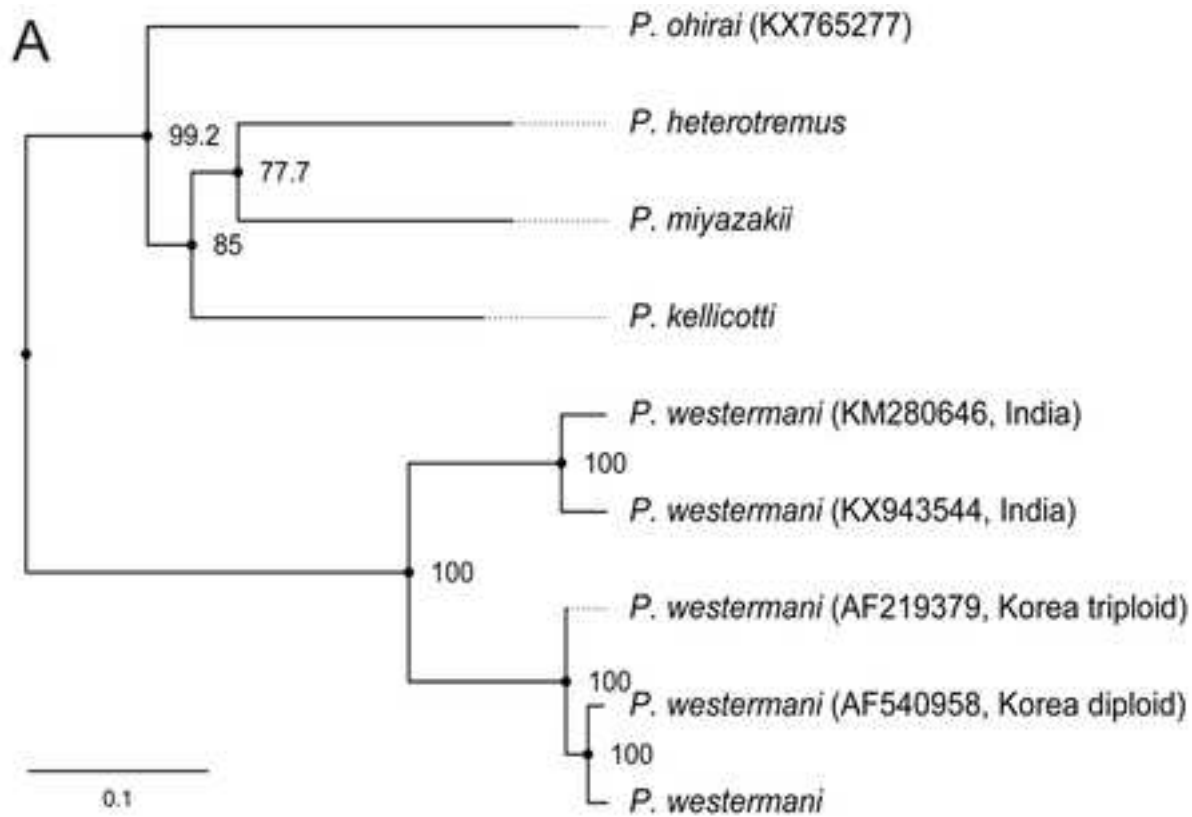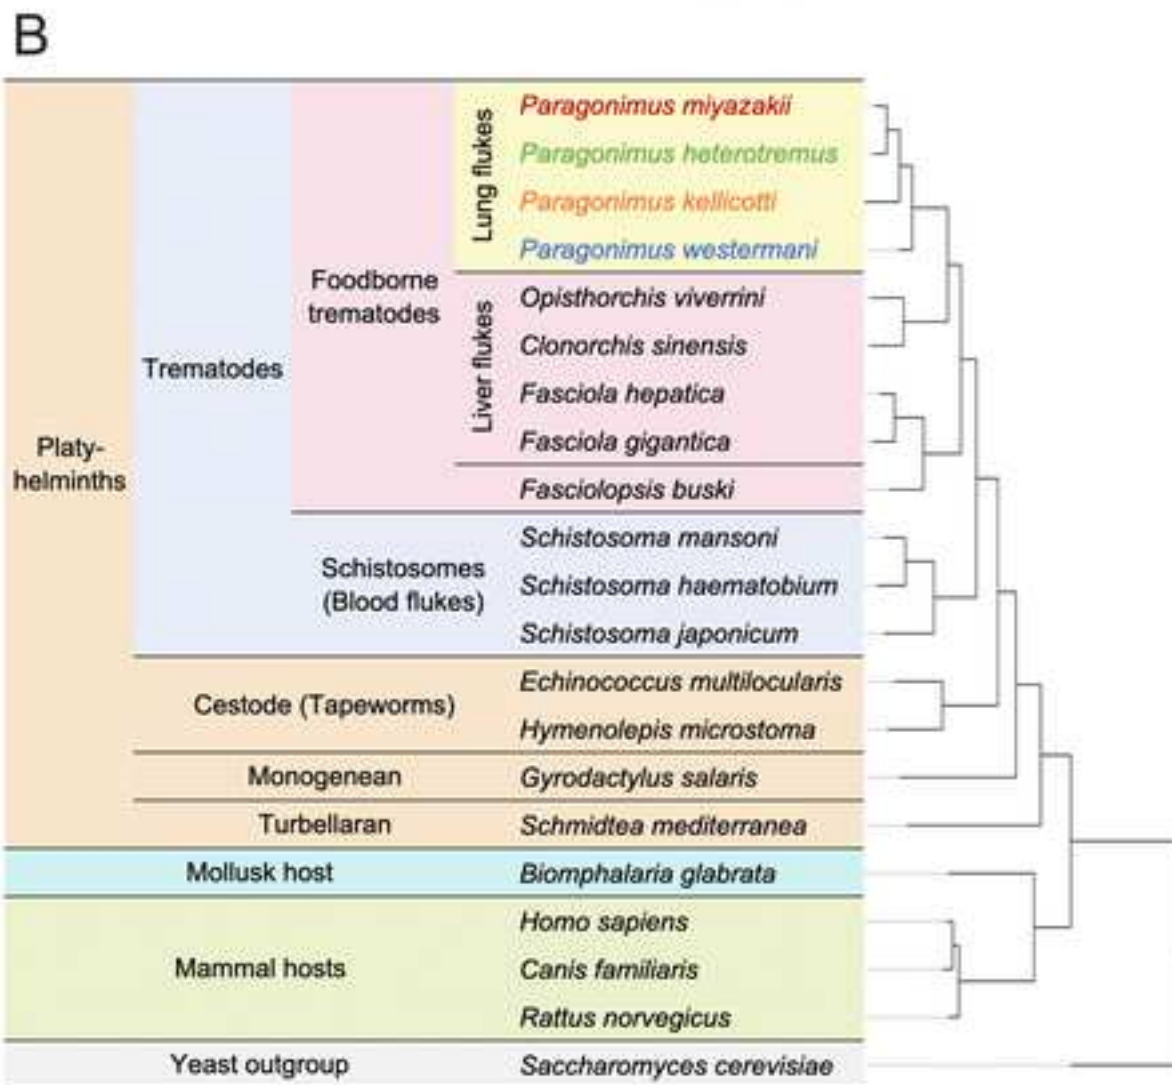



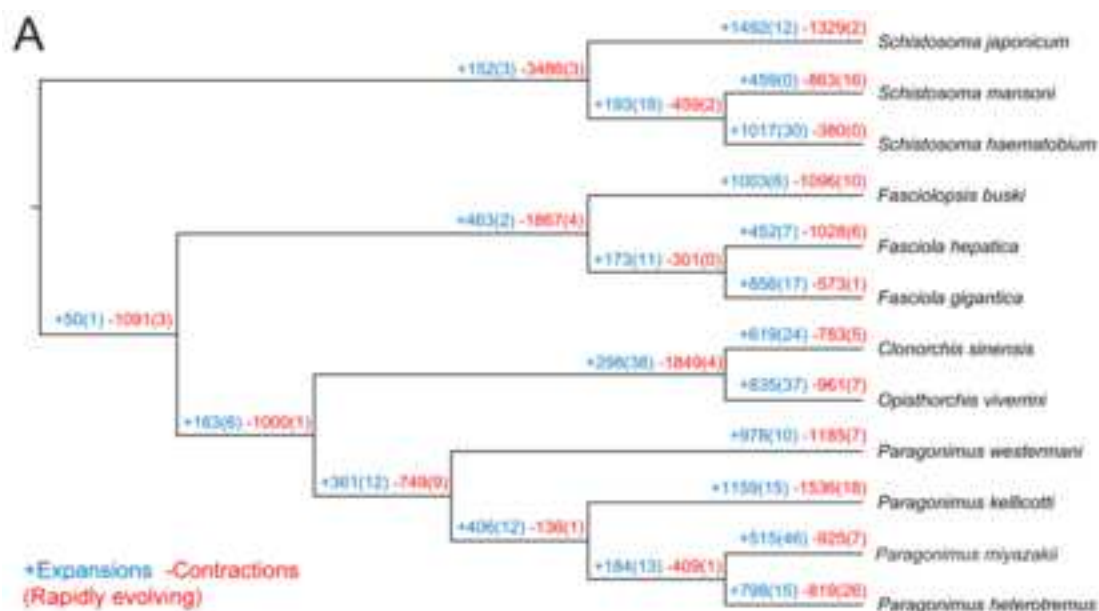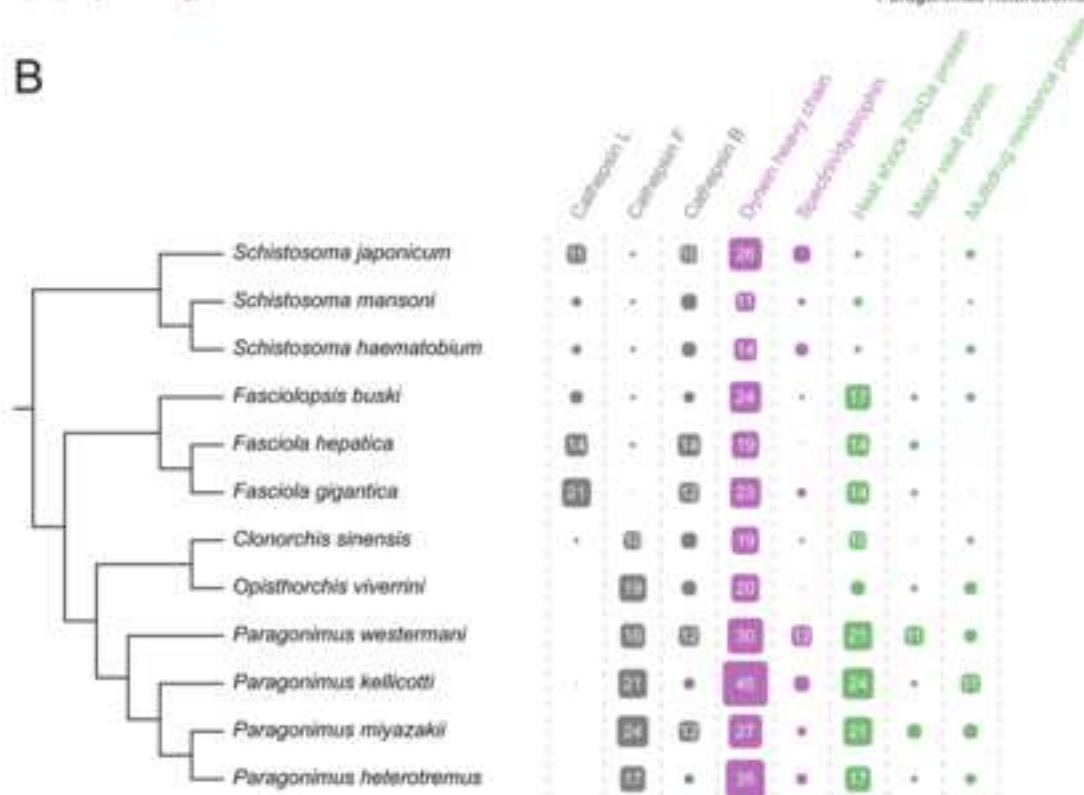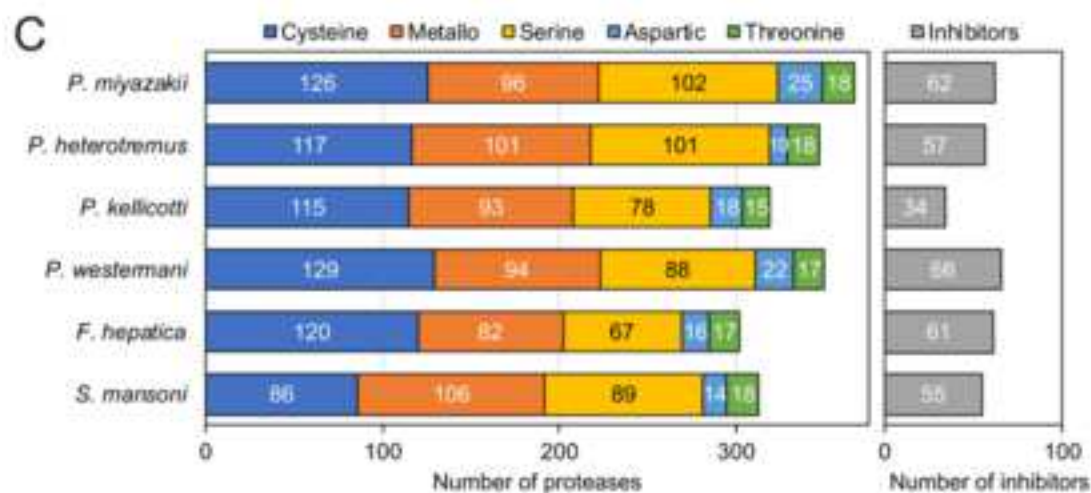

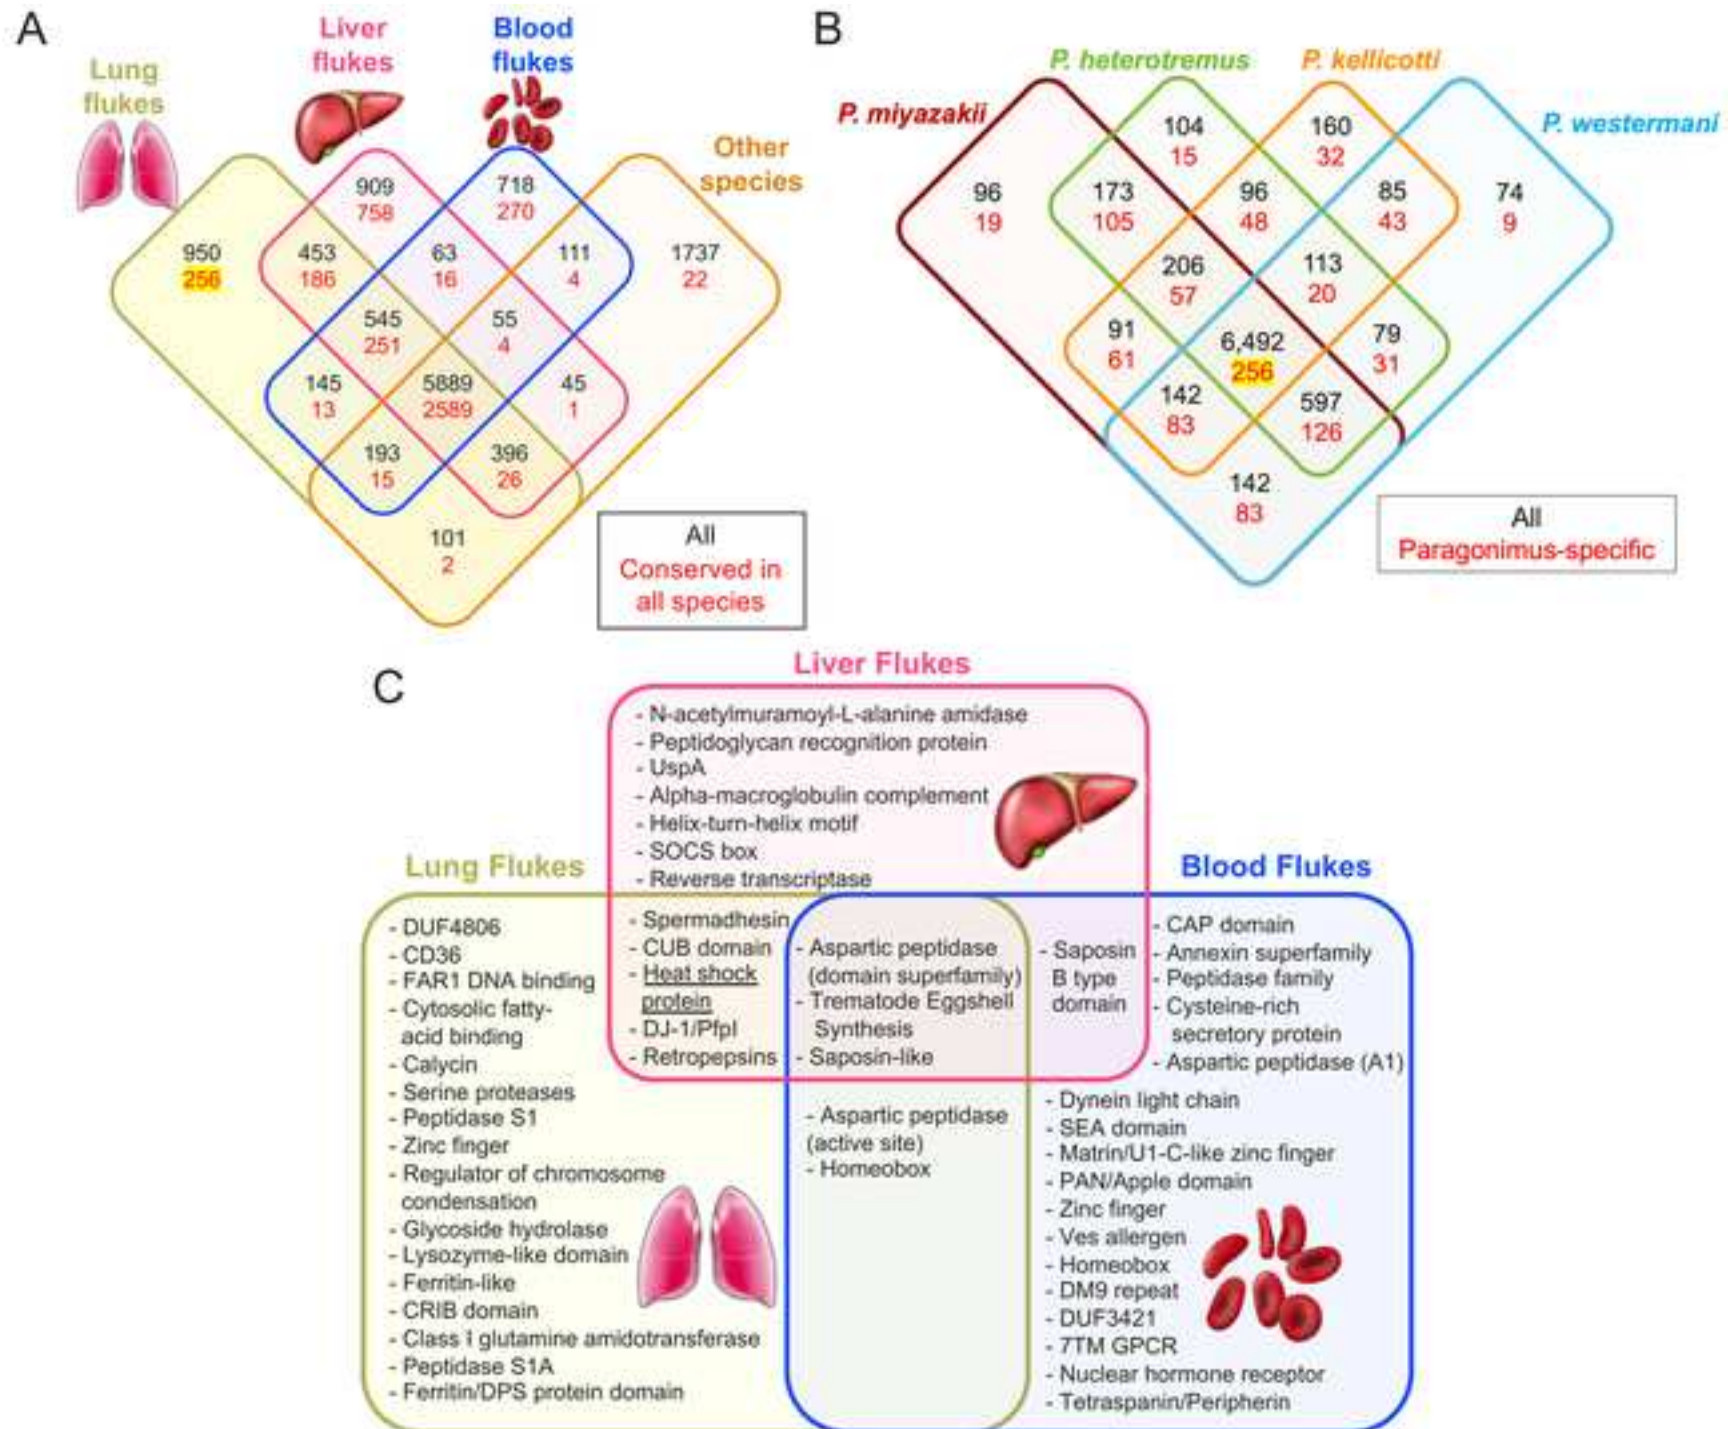

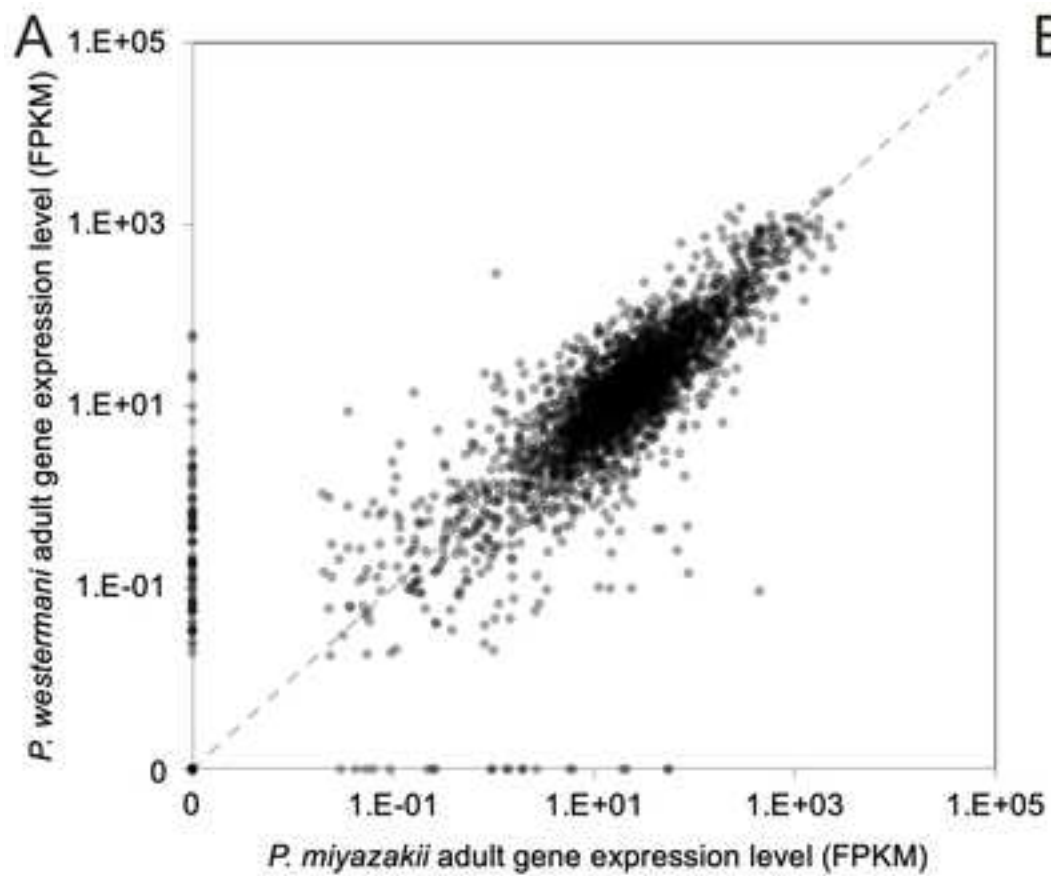**B****Adult stage 1:1 gene correlation**

|                        | <i>P. miyazakii</i> | <i>P. heterotremus</i> | <i>P. kellicotti</i> | <i>P. westermani</i> |
|------------------------|---------------------|------------------------|----------------------|----------------------|
| <i>P. miyazakii</i>    |                     |                        |                      |                      |
| <i>P. heterotremus</i> | 0.76                |                        |                      |                      |
| <i>P. kellicotti</i>   | 0.72                | 0.75                   |                      |                      |
| <i>P. westermani</i>   | 0.79                | 0.85                   | 0.76                 |                      |



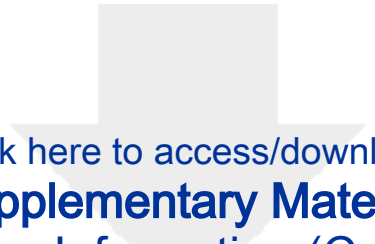

Click here to access/download

**Supplementary Material**

Supplementary Information (Combined) V5 -  
REVISED.docx

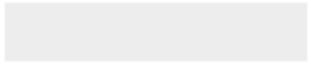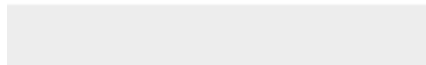

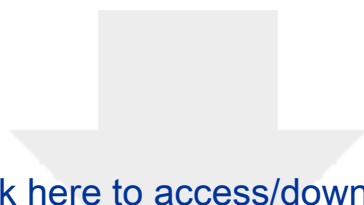

Click here to access/download  
**Supplementary Material**  
Supp Table S1 - Accessions.xlsx

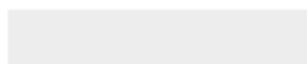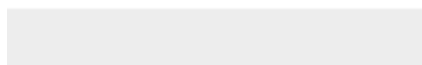



Click here to access/download

**Supplementary Material**

Supp Table S2 - Paragonimus expression data -  
REVISED.xlsx



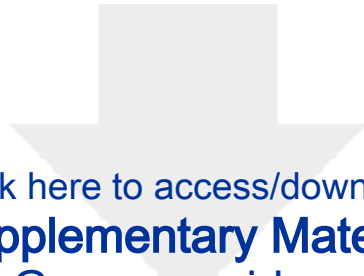

[Click here to access/download](#)

**Supplementary Material**

Supp Table S3 - Genome-wide selection scan.xlsx

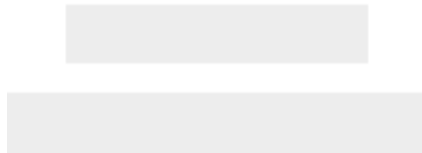

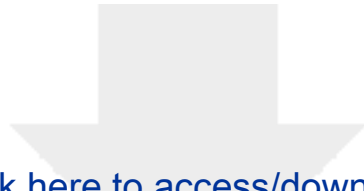

Click here to access/download  
**Supplementary Material**  
Supp Table S4 - OGs and FPKM.xlsx

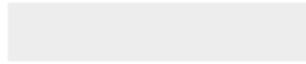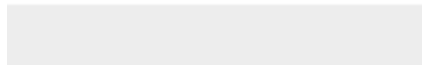



[Click here to access/download](#)

**Supplementary Material**

Reviewer Responses for Gigascience R2\_FINAL.docx

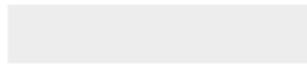

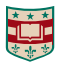

To  
Dr. Nicole Nogoy  
Editor  
Gigascience

4/30/2020

Re: **GIGA-D-19-00411R1** revision

Dear Dr. Nogoy,

Thank you for inviting us to submit a revised version of our manuscript: "*Comparative genomics and transcriptomics of four Paragonimus species provide insights into lung fluke parasitism and pathogenesis*" (GIGA-D-19-00411R1).

We appreciate the suggestions for improving the manuscript. As our point-by-point response document shows we have addressed all of the editorial and reviewers' concerns and we have revised the manuscript in accordance with the recommendations.

We very much appreciate your and the efforts of the referee in recommending how to best revise this manuscript. We have followed the advice especially closely and are hopeful that you will find it suitable for publication in Gigascience as a Research Article.

Thank you for your consideration.  
Yours sincerely,

**Makedonka Mitreva, PhD**

Professor, Department of Medicine and of Genetics,  
Assistant Director, McDonnell Genome Institute,  
Director, Center for Clinical Genomics of Microbial Systems,  
Washington University School of Medicine
