# Supplementary material for: Comparative genomics and transcriptomics of 4 Paragonimus species provide insights into lung fluke parasitism and pathogenesis
Source: PubMed Central journal article supplement (PMC7370270; doi:10.1093/gigascience/giaa073), 2020-07-20
Supplement: giaa073_response_to_reviewer_comments_original_submission.pdf [file giaa073_response_to_reviewer_comments_original_submission.pdf]

## Author's Response To Reviewer Comments

Close

Please see attached point-by-point response file (at the end of the PDF).

Close
